# Supplementary material
Source: publisher figshare collection journal article supplement (https://gsajournals.figshare.com/ndownloader/files/17081516)
Supplement: Supplementary file 1 [file 17081516]

## Sheet: README
DESCRIPTION OF SHEETS
SNP_counts_RADSeq: This sheet contains counts of all reads that mapped to the SNPs.
UniqueSNPs_perStrain: This sheet contains counts for SNPs that are unique to particular strains, including which strains that are unique to , and is also sorted by sample ID (including days of starvation and replicate.)
TraitData_GWAS: This is the processed data resulting from the unique SNPs per strain, and is the data used in GWAS.
GWAS_interval_summary: This is the output from CeNDR as part of the results from GWAS. It includes the number of different types of variants in the associated region.
GWAS_interval_variants: This is output from CeNDR as part of the GWAS results. It includes detailed descriptions of variants in the region.
GWAS_mapping_summary: This is output from CeNDR as part of the GWAS results. It includes all markers used in GWAS and how associated they are with the trait. Rightmost columns are included only if the marker reached significance.
EXPERIMENTAL DESIGN
R1 and R2 denote replicate 1 and 2
indirect denotes that samples were recovered in food after starvation
day indicates how many days samples were starved as L1s prior to recovery
id	replicate.id	experiment	day	total reads RAD-seq data
R1D16ind	R1	indirect	16	59164355
R1D21ind	R1	indirect	21	61384550
R2D1ind	R2	indirect	1	49116876
R2D7ind	R2	indirect	7	117835032
R2D14ind	R2	indirect	14	112517452
R2D21ind	R2	indirect	21	67247717
R2D24ind	R2	indirect	24	123890427

## Sheet: SNP_counts_RADSeq
R2D14ind	R2D1ind	R2D21ind	R2D24ind	R2D7ind	R1D16ind	R1D21ind	snp.idx
409	146	196	567	509	202	208	1
1	0	0	0	0	0	0	2
4508	1216	1580	4085	3479	1058	1347	3
50	34	2	14	70	10	14	4
2157	588	433	627	1573	532	650	5
2	0	1	5	3	0	2	6
0	0	1	1	0	0	0	7
7	0	0	7	4	2	0	8
0	0	0	0	1	0	0	9
0	0	0	0	0	0	0	10
742	210	204	256	1374	206	304	11
0	2	0	2	0	0	6	12
0	0	0	0	0	0	6	13
0	0	0	0	0	0	0	14
0	0	0	0	0	2	2	15
4	0	0	8	2	4	0	16
10	5	15	19	26	30	1	17
0	0	0	0	0	0	0	18
0	0	0	0	1	0	0	19
1583	576	682	1732	539	403	583	20
0	0	0	0	2	0	0	21
4	0	0	0	4	0	0	22
221	128	31	7	374	74	101	23
2	2	3	3	0	0	1	24
0	0	0	0	0	0	0	25
14	2	4	0	32	2	0	26
0	0	0	0	0	0	0	27
0	0	0	0	0	0	0	28
3	3	3	0	0	0	0	29
0	0	0	0	0	0	0	30
6	0	0	3	3	0	3	31
0	1	0	1	0	0	0	32
0	0	0	0	0	0	0	33
0	0	1	0	0	0	0	34
4824	844	923	5494	3741	1484	1932	35
0	0	0	0	0	0	0	36
1556	308	280	844	1516	436	700	37
72	20	24	0	94	0	16	38
0	0	0	0	1	0	0	39
0	0	0	1	0	0	0	40
0	0	1	0	2	0	0	41
2351	572	588	2679	2913	896	948	42
0	0	0	0	0	0	0	43
1	0	0	1	0	0	1	44
0	0	0	0	0	0	0	45
4	2	0	0	13	0	8	46
1268	390	494	1878	1542	592	542	47
1291	398	522	1897	1579	642	556	48
1318	354	333	1156	1422	480	624	49
0	0	0	0	0	0	0	50
2	0	0	2	0	0	0	51
2	0	0	4	0	2	0	52
2	0	0	0	0	0	0	53
16	2	0	6	48	4	30	54
2379	529	581	2477	1919	995	1131	55
0	0	0	0	0	0	2	56
0	0	0	0	0	0	0	57
2472	654	674	2435	1245	1229	1092	58
1	2	0	1	0	0	1	59
2	0	2	2	0	0	0	60
4482	1256	1699	6045	3753	1348	2156	61
0	0	0	0	0	0	0	62
0	0	0	2	0	0	0	63
0	0	0	0	3	3	0	64
5874	1883	1594	6046	9609	2497	2878	65
0	0	0	3	6	3	0	66
424	138	160	292	392	24	112	67
0	0	0	0	0	0	0	68
0	0	0	0	4	0	0	69
52	4	0	0	4	0	0	70
12	5	0	0	19	12	8	71
8349	1572	1964	8339	8644	1726	2172	72
0	8	4	4	4	0	0	73
4	0	0	2	2	0	0	74
0	0	0	6	2	0	0	75
132	122	85	374	85	150	91	76
1	0	0	0	0	0	0	77
256	114	108	295	189	85	168	78
1191	209	307	1489	952	458	542	79
0	0	0	0	0	0	0	80
15	3	0	0	32	0	0	81
0	0	0	3	0	0	3	82
262	77	55	17	407	56	57	83
0	0	0	3	0	0	0	84
1	0	0	0	1	1	0	85
1	0	0	0	2	0	0	86
2	0	0	1	1	0	0	87
815	255	180	83	969	279	193	88
2424	844	933	2710	1877	712	947	89
1263	349	351	1427	1466	336	435	90
0	0	0	0	2	1	0	91
3	0	0	1	1	0	0	92
2859	842	1034	3844	799	689	1174	93
52	30	46	39	12	18	40	94
237	98	108	551	589	93	108	95
1535	355	565	3129	1550	523	597	96
3	0	0	1	0	0	0	97
1	1	0	0	3	6	17	98
800	112	106	791	780	280	347	99
0	2	2	2	8	26	16	100
0	0	0	0	2	0	0	101
0	0	1	0	0	0	0	102
1	0	0	0	0	1	0	103
0	0	0	0	0	0	0	104
0	2	4	5	2	0	0	105
0	0	0	0	0	0	0	106
764	271	295	1174	389	378	526	107
12	1	1	0	4	1	0	108
0	0	0	0	1	0	0	109
0	0	0	0	0	0	0	110
1	0	0	0	0	0	0	111
1	0	0	2	3	1	0	112
0	0	0	2	1	0	2	113
2	0	2	2	2	0	0	114
0	2	0	4	6	0	2	115
6	0	2	2	3	0	4	116
6	0	0	6	6	0	6	117
0	0	0	2	0	0	0	118
10	4	16	6	18	8	2	119
3128	801	878	2923	3599	813	1062	120
2198	770	693	2264	2938	882	926	121
0	0	0	2	0	0	0	122
3337	1210	1188	3705	4126	1234	1874	123
12	6	8	0	18	0	24	124
24	4	6	2	36	20	10	125
48	4	0	0	52	0	84	126
2708	1254	1124	3598	3826	672	1116	127
44	20	8	0	8	24	12	128
52	48	24	68	120	0	4	129
2716	1264	1096	3528	3724	648	1056	130
1258	436	377	1355	2129	500	596	131
2	0	0	0	5	0	1	132
1239	309	255	1681	1573	381	700	133
0	0	0	1	1	0	0	134
0	2	0	0	0	1	0	135
44	2	2	16	20	0	20	136
0	0	0	0	0	0	0	137
5	1	0	5	6	0	0	138
1391	357	404	1535	854	592	690	139
2	0	0	1	2	0	1	140
213	73	66	44	601	62	61	141
1	0	0	2	0	0	0	142
0	0	1	0	1	0	0	143
0	0	0	0	1	0	0	144
340	98	76	219	278	114	176	145
0	2	0	0	0	0	0	146
1533	549	574	1964	2186	581	787	147
1	0	0	0	1	0	0	148
0	0	0	0	2	0	0	149
0	0	0	1	0	0	0	150
0	0	0	1	0	0	0	151
0	1	0	0	0	0	0	152
549	259	293	671	460	182	208	153
612	297	249	150	942	276	189	154
1500	739	744	2146	2146	665	639	155
27	9	27	0	21	6	6	156
2661	786	946	2891	3108	774	978	157
0	0	0	1	0	0	0	158
0	0	0	0	2	0	0	159
608	249	229	675	843	265	270	160
6	0	2	2	16	12	0	161
448	91	86	56	528	250	158	162
752	251	190	203	608	321	326	163
202	30	22	23	110	55	85	164
7	7	3	0	33	7	4	165
2565	529	502	2500	2863	898	1203	166
48	4	12	12	6	21	20	167
0	0	0	0	0	0	0	168
458	64	196	1336	526	158	194	169
3	1	0	7	0	0	1	170
0	0	0	1	0	0	0	171
0	0	0	0	2	0	0	172
0	0	0	0	0	0	0	173
1054	317	362	1324	2265	300	399	174
0	372	348	0	0	0	0	175
1	1	2	1	2	1	0	176
0	1	0	1	0	0	0	177
0	0	0	1	0	0	0	178
0	0	0	1	0	0	1	179
2	0	1	0	1	0	0	180
0	2	0	8	0	0	2	181
38	26	12	0	72	18	66	182
0	0	0	0	0	0	0	183
405	133	264	610	426	161	237	184
34	17	7	0	10	2	9	185
2	0	1	1	2	1	1	186
0	0	0	0	0	0	0	187
0	1	0	0	1	0	0	188
6	2	1	0	19	15	7	189
2	1	2	1	0	1	0	190
0	0	0	0	0	0	1	191
6	0	0	0	0	0	0	192
3106	918	926	3145	4050	1256	1382	193
0	27	36	0	0	0	0	194
2	0	3	4	0	2	0	195
203	21	65	266	162	83	85	196
748	198	247	1223	756	368	444	197
2104	477	549	1700	1973	862	860	198
806	246	244	158	1428	318	248	199
0	3	0	2	2	0	2	200
4	0	0	2	2	0	1	201
1049	334	365	1104	1291	414	481	202
0	0	0	1	0	1	3	203
0	0	0	0	0	0	0	204
33	14	4	7	14	4	16	205
16	20	10	22	6	12	5	206
0	0	0	0	0	0	0	207
4	3	8	4	15	0	9	208
967	222	168	117	1478	322	300	209
28	14	11	1	11	9	10	210
0	0	1	1	2	0	2	211
4138	756	816	4160	4802	1790	1658	212
4168	757	818	4165	4807	1794	1666	213
518	194	212	467	1067	199	209	214
0	0	0	0	0	0	0	215
8	2	0	0	0	0	2	216
2320	482	600	3866	2418	882	1138	217
1	1	0	1	0	1	1	218
1545	293	344	1449	1557	488	578	219
22	8	6	0	78	0	24	220
248	75	26	12	340	60	32	221
0	0	0	1	0	0	1	222
0	0	0	0	1	0	0	223
302	95	49	14	405	69	59	224
0	0	0	0	0	0	0	225
366	113	140	816	328	114	182	226
1694	308	330	210	1956	550	422	227
2532	512	486	290	2690	732	544	228
0	1	0	0	0	0	0	229
27	9	7	0	39	4	22	230
4	0	0	0	1	0	0	231
0	0	0	2	2	0	0	232
0	0	1	0	0	0	0	233
2	4	0	0	0	0	0	234
2	0	0	0	2	0	2	235
19	5	8	0	17	2	2	236
102	20	16	3	298	6	9	237
0	0	0	0	2	0	4	238
0	0	0	0	0	0	0	239
0	0	0	1	1	1	0	240
0	0	0	1	0	0	0	241
1	1	0	3	1	1	0	242
0	0	0	0	0	0	0	243
45	10	18	8	26	8	18	244
0	2	0	0	0	0	0	245
1270	329	387	1511	1873	366	666	246
0	0	0	2	0	0	0	247
1	0	0	0	0	0	0	248
16	0	0	8	0	0	8	249
40	0	24	32	104	28	60	250
8	0	0	0	4	4	0	251
12	0	0	0	8	0	0	252
92	16	10	1	63	39	23	253
3320	1055	1308	3224	3140	1701	1937	254
0	0	0	0	0	0	0	255
63	12	24	0	72	69	9	256
519	36	119	150	183	76	106	257
2	0	0	3	0	0	1	258
16	0	1	2	8	0	5	259
0	0	0	0	0	0	0	260
1819	374	402	2200	1604	497	838	261
2	0	1	2	0	0	2	262
0	2	2	0	0	0	2	263
0	0	1	1	0	0	0	264
1	2	0	0	0	0	0	265
640	142	236	698	134	64	98	266
2395	832	1128	2639	1664	88	256	267
1	3	3	0	0	1	0	268
1	0	0	0	0	0	0	269
4	0	0	0	3	0	3	270
0	0	2	0	0	0	2	271
0	0	0	0	0	0	0	272
2109	671	695	1999	1946	728	1037	273
382	115	114	46	321	102	144	274
2061	408	608	3853	1227	1023	1171	275
0	0	0	0	0	0	0	276
0	0	0	4	0	0	0	277
1159	219	335	1887	1140	522	731	278
0	0	2	0	0	4	9	279
799	173	201	817	983	243	322	280
2	0	0	2	0	0	1	281
0	0	0	0	0	0	2	282
0	0	0	2	0	0	0	283
0	1	0	1	3	0	0	284
4686	1004	972	4712	3424	2208	2612	285
14	0	0	4	10	6	0	286
1	0	0	0	0	1	0	287
2307	1032	1208	2749	2523	758	831	288
76	24	4	0	14	16	8	289
0	0	0	3	0	0	6	290
7	0	0	35	28	0	21	291
21	7	0	35	21	0	28	292
0	0	0	0	14	0	0	293
13432	4239	4362	12232	14580	7140	7579	294
14	7	7	14	7	14	7	295
14	7	7	7	7	0	14	296
13681	4265	4385	12408	14727	7211	7626	297
1188	306	376	1368	1188	488	634	298
0	0	0	0	0	0	0	299
0	0	0	2	0	0	0	300
2405	563	718	2921	2459	1027	1253	301
2385	544	696	2862	2448	1014	1176	302
2701	686	892	3209	3293	1345	1974	303
2	4	2	0	2	2	2	304
7166	1234	1285	6833	4741	2937	3442	305
2074	254	346	220	1666	606	582	306
160	241	88	52	202	89	67	307
9	2	2	1	8	5	5	308
0	0	0	0	0	0	0	309
0	0	0	0	0	0	2	310
0	0	0	0	0	0	0	311
44	4	4	2	24	6	8	312
1	0	0	2	2	0	1	313
1218	303	318	1464	1251	453	495	314
292	102	70	14	590	145	64	315
0	2	0	0	0	0	0	316
1018	335	347	1690	1060	377	755	317
276	44	101	62	239	78	86	318
0	0	0	0	0	0	0	319
0	0	0	0	0	0	0	320
0	0	0	0	0	0	0	321
0	0	6	3	6	0	0	322
3144	1021	1180	4200	999	1155	1201	323
2535	874	1035	4624	904	837	1182	324
11471	2996	3576	12832	4280	4021	4415	325
4	3	0	7	0	0	0	326
7968	1942	2234	8182	2968	2727	2955	327
0	8	24	8	4	0	0	328
4965	1364	1485	6410	1613	1494	2159	329
22	0	24	2	4	24	4	330
0	0	2	2	0	0	0	331
1	0	0	4	3	0	0	332
0	8	0	0	0	0	0	333
4	6	0	0	36	16	24	334
7	0	0	5	3	0	0	335
2789	1249	1918	8733	1350	1288	2000	336
6	6	10	6	3	0	3	337
1467	393	420	1817	531	411	581	338
6	0	0	1	3	0	1	339
0	0	0	0	2	0	0	340
2	0	0	2	2	0	2	341
0	0	0	6	2	0	0	342
7	4	6	0	27	6	2	343
3006	548	536	2679	2809	1127	1575	344
664	324	396	1216	511	408	509	345
245	58	51	3	112	28	39	346
3458	1168	1449	3567	2962	1206	1394	347
0	0	2	2	2	2	0	348
49	14	9	10	61	10	16	349
1593	421	325	257	1045	450	358	350
2901	721	807	3229	1647	881	1056	351
1	0	0	0	1	0	1	352
776	142	278	946	1232	144	294	353
206	33	26	41	425	62	80	354
37	12	9	1	31	2	7	355
271	76	99	445	266	68	100	356
0	2	1	1	0	0	0	357
1291	366	394	1847	1338	532	635	358
10	3	0	1	17	5	6	359
28	2	34	16	28	62	6	360
2	0	0	6	4	2	0	361
0	0	0	0	0	0	0	362
0	0	0	0	0	0	0	363
1	1	1	0	0	0	0	364
261	99	120	421	190	149	176	365
0	0	0	1	0	0	1	366
3	0	0	4	0	0	0	367
4	5	0	0	5	0	0	368
3154	1384	1573	3563	1568	1378	1632	369
84	56	24	64	42	8	0	370
2033	944	951	1959	3697	520	544	371
0	8	0	0	8	0	0	372
0	0	0	0	0	0	0	373
88	56	24	64	55	0	0	374
0	0	0	8	0	0	0	375
0	0	0	0	16	0	0	376
2006	892	999	1978	3674	550	676	377
6	0	0	67	0	0	6	378
4696	930	1000	3823	8642	911	1944	379
0	0	0	0	0	0	0	380
102	0	12	12	378	0	18	381
0	0	0	0	0	0	0	382
84	0	18	0	372	0	18	383
4	4	0	0	4	0	2	384
83	20	20	6	54	12	6	385
0	0	0	0	0	0	0	386
10	4	0	0	1	4	4	387
5	5	0	1	14	6	1	388
8	4	8	2	5	5	4	389
0	0	3	12	4	0	4	390
4116	723	821	560	2539	897	1258	391
4	0	0	0	4	0	0	392
1111	313	328	1129	1016	557	658	393
890	219	136	78	871	351	272	394
0	0	0	0	0	0	0	395
1605	526	629	2356	3834	578	966	396
3	0	0	0	0	0	0	397
0	0	0	0	0	0	0	398
90	12	7	1	33	25	26	399
655	107	101	76	483	146	141	400
0	0	0	0	0	0	0	401
0	0	0	0	0	0	0	402
29	11	3	0	37	9	6	403
1753	360	434	1720	2013	859	948	404
0	4	5	1	0	0	1	405
0	2	4	0	0	0	0	406
14	10	21	0	52	2	0	407
59	19	6	1	70	43	35	408
1634	450	500	2156	2058	603	798	409
2290	676	658	2284	3082	906	1196	410
0	0	0	1	0	0	1	411
1102	330	351	1022	1090	388	527	412
63	5	1	2	14	23	6	413
25	4	3	2	12	5	8	414
0	0	0	0	1	0	0	415
0	0	0	0	2	0	0	416
0	0	0	0	0	0	0	417
58	29	10	0	99	29	3	418
0	648	690	0	2	0	0	419
2	1	0	2	0	1	0	420
304	81	82	45	346	159	119	421
0	0	0	0	0	0	0	422
52	14	8	0	18	8	30	423
1277	299	387	1398	1095	447	654	424
0	2	0	0	0	0	0	425
2	2	0	0	2	0	0	426
462	96	88	6	240	178	154	427
0	0	0	2	0	0	2	428
173	27	78	84	126	159	174	429
9423	1545	1686	8199	8025	3219	3684	430
3	0	0	0	6	3	0	431
2929	871	1012	3382	2785	1213	1397	432
338	130	92	36	240	32	96	433
4812	1124	2083	9492	1958	928	1148	434
236	16	16	20	116	32	12	435
10259	2733	3237	12431	4485	2185	2852	436
0	0	0	0	0	0	0	437
1	0	0	0	0	1	0	438
523	88	141	644	523	175	252	439
0	0	0	0	1	0	0	440
0	0	0	0	0	0	0	441
4	0	0	0	0	0	0	442
317	120	155	419	657	83	141	443
23	8	6	2	60	3	19	444
0	0	0	0	0	0	0	445
1467	455	525	1364	1797	531	705	446
4	8	4	4	12	0	0	447
5253	1444	1540	6285	7304	1890	2355	448
4	4	4	4	0	4	0	449
20	0	0	24	20	4	0	450
186	18	48	6	102	48	30	451
0	0	0	0	0	0	0	452
3138	1074	1290	5380	2634	1740	1956	453
6	0	0	0	0	0	0	454
6	0	0	0	0	0	0	455
0	0	0	0	0	0	0	456
0	0	0	3	0	0	0	457
2	0	0	0	0	6	0	458
1872	528	720	2157	711	756	732	459
4	0	1	10	1	10	2	460
1179	336	464	2064	1095	436	755	461
114	22	18	2	54	24	32	462
79	42	20	16	238	8	56	463
76	12	6	0	172	66	34	464
1163	262	339	1347	713	266	410	465
2096	502	762	3199	1719	651	1057	466
1146	304	276	710	944	432	681	467
0	0	0	0	0	0	4	468
1136	300	276	704	936	432	664	469
1	1	0	0	0	0	0	470
1	0	0	1	0	0	0	471
1606	404	486	1822	2016	414	598	472
2	0	0	0	0	0	0	473
2	0	0	0	2	0	2	474
0	20	0	0	0	0	0	475
3	0	0	0	3	0	0	476
0	0	3	0	0	0	0	477
0	3	4	0	0	0	0	478
402	112	198	732	304	93	145	479
0	0	1	3	1	0	0	480
2990	868	967	2864	3010	900	916	481
4	2	0	2	0	0	0	482
3	1	0	1	2	0	0	483
0	4	2	0	0	0	0	484
0	0	0	0	0	0	0	485
967	312	368	1735	1156	272	358	486
0	0	0	2	0	0	0	487
1246	387	456	1533	1366	463	373	488
0	0	0	0	0	0	0	489
0	0	0	0	0	0	0	490
0	0	0	0	0	0	0	491
182	14	12	3	96	64	58	492
2	0	0	2	2	2	2	493
6	0	0	6	0	0	0	494
14	0	14	0	0	24	2	495
0	0	0	2	2	0	0	496
5	0	0	3	0	0	0	497
102	17	7	1	39	13	29	498
0	0	0	0	0	0	0	499
45	9	0	0	15	9	0	500
3	3	3	11	6	3	0	501
3	12	3	3	6	0	3	502
15	0	2	8	28	10	2	503
2	1	0	4	2	0	0	504
2	0	0	2	0	1	0	505
2	6	4	2	0	0	0	506
0	0	0	2	2	2	0	507
0	0	4	2	2	0	0	508
0	0	0	2	2	2	0	509
26	0	4	0	40	14	2	510
0	0	0	0	4	0	0	511
38	18	0	0	22	26	32	512
0	0	0	0	8	2	0	513
78	4	14	6	68	42	64	514
2	0	0	6	2	0	0	515
2	1	0	1	3	0	1	516
0	0	0	0	0	0	0	517
0	0	0	0	0	0	0	518
72	23	8	0	31	35	0	519
0	0	0	1	1	0	3	520
21	6	3	12	7	6	22	521
10	6	0	10	32	50	22	522
344	142	146	24	528	116	108	523
1011	510	516	1508	1590	708	714	524
0	0	0	2	0	0	0	525
2	0	0	2	2	0	0	526
8	6	2	16	8	6	2	527
2953	1389	1488	3760	1696	1457	1605	528
572	135	139	1433	694	162	339	529
0	0	0	2	0	0	0	530
0	0	0	1	0	0	0	531
0	0	0	0	0	0	0	532
0	0	0	0	0	0	0	533
5	0	0	0	1	0	1	534
0	0	0	0	0	0	0	535
0	2	2	0	2	0	0	536
2	1	0	0	0	1	0	537
0	0	0	0	4	2	6	538
1658	294	238	2438	1520	794	950	539
3635	1375	1632	5251	4098	1870	2476	540
0	0	0	0	0	0	0	541
3	3	0	0	6	0	0	542
0	0	0	0	0	0	0	543
0	0	0	0	0	0	0	544
592	148	191	82	607	150	197	545
0	0	0	2	2	0	0	546
13	2	4	0	9	11	1	547
0	3	0	0	0	9	0	548
4	0	0	2	19	7	0	549
0	0	0	0	0	0	0	550
0	0	0	0	0	0	0	551
0	0	0	0	0	0	0	552
1	1	1	3	4	0	2	553
631	129	161	547	901	160	215	554
325	68	62	30	299	144	87	555
5522	1302	1249	6302	4856	2244	2241	556
0	0	0	0	3	0	0	557
2	0	0	2	4	0	0	558
3513	796	796	3046	4026	1357	1673	559
0	0	0	1	0	0	0	560
781	252	309	784	740	367	382	561
0	0	0	0	0	0	0	562
2	0	0	0	0	0	0	563
1458	342	422	2486	1580	444	624	564
3	1	1	3	3	1	1	565
0	0	0	1	0	0	0	566
2618	692	764	2777	2593	644	842	567
3	0	3	0	0	0	0	568
714	327	195	138	489	225	351	569
3	3	0	3	6	0	3	570
0	0	0	1	0	0	0	571
0	0	1	0	0	0	0	572
0	0	0	0	0	0	0	573
0	0	0	0	0	0	0	574
961	185	259	144	1055	286	278	575
1874	489	567	2418	2382	768	1144	576
709	176	210	1059	616	348	330	577
0	0	0	0	0	0	0	578
0	0	0	0	0	0	0	579
1585	268	345	180	1320	380	525	580
0	0	0	0	0	0	0	581
0	0	0	5	0	0	0	582
0	0	0	5	0	0	0	583
0	0	6	8	8	0	0	584
0	0	0	0	0	0	0	585
0	0	0	0	0	8	0	586
23	0	0	0	8	0	0	587
0	0	0	0	0	8	0	588
8	0	0	0	0	0	0	589
0	0	0	16	0	0	0	590
0	0	0	8	8	8	0	591
3	1	2	1	2	0	1	592
186	51	45	15	258	48	69	593
2133	343	338	168	1771	624	521	594
5653	1245	1267	5045	6632	2577	2495	595
3928	857	844	5250	4859	1270	2094	596
0	0	0	0	6	0	0	597
0	6	0	0	12	0	0	598
0	0	0	0	6	0	0	599
120	30	6	0	276	42	0	600
1514	222	239	270	1370	330	684	601
0	0	0	0	0	0	3	602
45	15	15	0	45	18	42	603
0	0	0	0	0	0	3	604
0	0	8	24	0	8	0	605
264	30	24	0	336	16	40	606
248	30	16	0	368	24	40	607
6960	2206	1992	10580	6632	2502	3054	608
240	30	16	0	344	16	40	609
9875	3007	2905	11307	9787	3654	3884	610
9883	3013	2905	11307	9781	3648	3884	611
16	0	0	40	24	0	8	612
0	6	6	0	6	0	0	613
8584	2498	2669	13433	8246	3632	5184	614
312	618	786	96	162	204	42	615
156	36	6	24	78	126	0	616
150	36	6	30	72	126	0	617
6	0	0	0	12	0	0	618
6216	2212	2303	6621	5600	2639	3164	619
28	35	7	6	21	0	35	620
21	35	7	0	21	0	35	621
7	0	0	7	7	0	0	622
7	0	0	0	0	0	0	623
0	0	0	7	0	7	0	624
14	7	0	7	0	0	0	625
0	0	0	0	9	0	0	626
0	9	0	0	0	0	0	627
11029	3361	3567	11591	16108	4863	5803	628
0	0	0	0	9	0	0	629
0	0	0	0	0	0	0	630
10921	3351	3554	11465	15999	4839	5735	631
0	0	9	9	0	0	7	632
10716	3291	3497	11154	15858	4716	5688	633
0	0	0	0	0	0	0	634
736	163	187	83	398	156	169	635
0	0	1	1	0	0	1	636
907	159	142	101	588	248	261	637
163	61	60	50	272	37	34	638
615	190	163	629	742	172	260	639
10	6	2	0	44	8	0	640
1062	234	260	1292	1948	374	496	641
5	0	0	0	7	3	1	642
0	0	0	0	0	0	0	643
889	175	212	113	874	320	285	644
0	0	0	0	0	1	0	645
0	0	0	0	2	0	0	646
0	0	0	0	0	0	0	647
332	95	109	36	285	99	155	648
5264	1347	1572	4926	5796	2154	2265	649
5260	1347	1568	4922	5792	2158	2269	650
5197	1335	1537	4799	5721	2090	2332	651
5169	1284	1512	4716	5656	2092	2197	652
108	14	13	0	49	43	61	653
4	0	0	4	0	0	0	654
3180	1172	1076	4525	4430	1068	1614	655
2214	900	768	4461	2968	856	1282	656
2082	868	752	4461	2780	784	1230	657
2	6	4	14	28	14	12	658
1106	298	292	1948	1670	420	806	659
483	96	84	43	541	82	116	660
2	2	2	0	0	0	0	661
2	0	2	6	2	0	2	662
0	0	0	1	0	0	0	663
0	0	0	0	0	0	0	664
0	0	0	0	0	0	0	665
0	5	0	0	0	0	0	666
6873	2258	2575	6612	7524	3090	3989	667
6855	2225	2540	6560	7540	3085	3975	668
4468	936	1286	4426	6034	1712	2028	669
186	50	28	16	212	40	76	670
2	1	0	1	2	1	0	671
17809	4773	5037	21971	11004	4563	6312	672
17837	4761	5046	21965	10992	4551	6333	673
18	6	0	6	0	0	0	674
42	0	0	18	12	0	0	675
17738	4773	5050	21845	11003	4587	6356	676
17706	4773	5056	21790	11003	4587	6350	677
0	12	4	4	4	0	0	678
4	4	0	4	4	0	8	679
6917	1992	1884	6598	7963	2614	3104	680
6917	1992	1880	6602	7959	2614	3100	681
0	4	4	8	0	0	0	682
0	0	0	4	0	0	0	683
8106	1684	1680	7244	7747	2832	3539	684
0	0	0	16	0	0	4	685
38	0	0	1	14	5	0	686
2	0	6	14	2	2	0	687
0	0	0	10	0	0	0	688
0	0	0	0	2	0	0	689
1818	807	1023	1831	2100	673	673	690
2	0	0	0	0	0	0	691
0	0	0	0	0	0	0	692
0	0	0	0	0	0	0	693
2737	1584	1404	6728	5048	1422	1674	694
0	18	0	0	0	0	0	695
4308	2304	2422	7126	7400	2075	2079	696
4308	2309	2437	7168	7455	2075	2079	697
4312	2309	2437	7232	7467	2065	2095	698
0	0	0	0	0	0	0	699
0	0	0	0	0	153	99	700
0	0	0	0	0	0	0	701
5	0	0	6	12	0	0	702
6	0	0	0	0	0	0	703
0	0	0	0	0	0	0	704
6	0	0	0	0	0	0	705
6	0	0	0	0	0	0	706
6	6	0	12	0	0	0	707
0	0	0	0	0	0	0	708
0	0	0	0	0	0	0	709
5	0	0	20	0	0	35	710
5	0	0	20	0	0	35	711
0	5	0	0	0	0	0	712
6	2	0	42	0	6	6	713
7446	3198	2846	9171	10731	3087	3268	714
6	6	0	12	12	0	0	715
0	0	0	6	0	0	0	716
5	0	0	17	0	0	0	717
6	0	0	36	0	6	6	718
1837	456	427	1625	1871	791	727	719
0	0	0	0	0	0	0	720
5	0	0	90	10	40	0	721
10	10	10	0	5	0	0	722
10675	2300	2578	11137	13435	3650	4475	723
5	0	0	80	20	40	0	724
0	0	0	0	0	5	0	725
471	115	118	566	428	142	246	726
30	12	24	0	30	0	18	727
0	6	0	0	0	0	0	728
0	0	0	0	3	0	0	729
0	0	0	0	0	0	0	730
6	0	0	0	0	0	0	731
4434	1272	1524	4722	9324	1236	2022	732
19	1	3	32	13	6	6	733
0	4	2	0	12	8	20	734
0	4	2	0	18	8	20	735
1572	681	649	2552	2496	616	838	736
0	0	0	10	2	0	0	737
1	1	1	1	0	0	0	738
0	0	0	0	0	0	0	739
60	5	0	0	0	0	25	740
60	5	0	6	6	0	31	741
0	0	6	6	0	0	0	742
6050	1557	1800	6556	6418	1916	3420	743
18	6	0	0	0	6	12	744
0	0	0	0	0	0	0	745
1	0	0	2	1	0	0	746
2335	488	473	2301	3200	850	999	747
0	0	0	0	0	0	0	748
2309	808	1357	5186	918	392	513	749
4504	1880	1824	7080	7104	1528	2760	750
4504	1888	1832	7095	7104	1528	2760	751
0	0	0	0	0	0	0	752
0	0	0	0	0	0	0	753
0	0	0	80	16	0	0	754
4504	1888	1840	7004	7080	1528	2752	755
8	0	0	0	0	0	0	756
0	9	0	8	0	0	0	757
0	4	0	0	0	0	0	758
4	0	0	8	0	20	0	759
4	0	8	12	0	20	0	760
0	0	0	0	8	0	0	761
29	6	2	2	21	1	16	762
4	0	0	4	8	0	4	763
0	0	12	0	12	0	0	764
979	1011	1020	1028	1083	264	484	765
32	12	12	0	48	0	16	766
28	8	17	19	53	60	33	767
62	22	23	0	95	17	11	768
0	0	0	0	0	0	0	769
84	52	4	12	111	66	9	770
30	12	0	36	6	6	15	771
42	20	16	42	30	12	9	772
0	0	0	0	0	0	0	773
775	150	150	925	806	234	407	774
3642	975	1218	4308	4317	1359	1521	775
6	0	3	3	3	0	0	776
3592	945	1185	4337	4200	1361	1505	777
0	0	0	1	1	0	0	778
0	0	0	0	0	0	0	779
0	0	2	2	0	0	0	780
654	112	138	326	524	124	216	781
1	2	0	2	11	11	7	782
0	0	0	0	0	0	0	783
2	0	0	0	2	0	2	784
1586	500	574	1572	1858	480	538	785
14	5	4	0	3	3	0	786
1318	282	315	1573	1165	463	632	787
0	1	2	0	0	0	0	788
0	0	0	0	0	0	0	789
0	0	0	0	6	0	0	790
0	0	0	3	0	0	0	791
0	0	0	0	3	0	3	792
8	0	2	0	6	4	0	793
0	0	0	2	0	0	0	794
0	0	0	0	0	0	0	795
1	0	0	0	0	1	0	796
0	0	0	0	0	0	0	797
1	0	0	1	0	1	0	798
42	2	0	0	17	2	0	799
4024	938	964	5344	4289	1630	2514	800
28	10	6	2	59	0	30	801
0	0	0	0	0	0	0	802
224	58	72	492	662	184	242	803
2	0	2	0	1	0	1	804
6169	1944	2224	6880	5474	1551	2251	805
104	36	28	10	73	22	38	806
3	0	0	3	3	0	0	807
0	0	0	0	0	0	0	808
0	0	0	0	0	0	0	809
1243	414	548	1830	1540	426	658	810
11226	2110	2561	10124	9503	2786	3845	811
3	0	0	0	0	0	15	812
11222	2123	2553	10131	9453	2798	3844	813
4041	926	1328	3502	3747	1558	1963	814
0	0	0	0	3	3	0	815
0	0	0	0	3	0	0	816
6272	1731	1995	7011	5747	1694	2419	817
0	0	2	0	0	0	0	818
122	35	32	9	76	22	68	819
87	15	42	72	36	90	39	820
1939	674	726	3198	952	654	846	821
15	15	15	5	15	55	30	822
5840	1230	1640	7490	3360	1973	2665	823
5	5	10	0	0	5	5	824
6666	1543	1729	7653	4359	2279	3116	825
0	0	10	0	0	0	0	826
2007	748	873	3133	1571	825	1010	827
2415	875	914	3109	1838	903	1035	828
0	0	0	3	0	0	0	829
1	0	0	0	2	1	0	830
5862	1348	1491	6011	4351	1430	1690	831
4302	1062	1077	5134	3314	1116	1434	832
762	198	220	611	630	174	251	833
380	100	156	1010	111	127	196	834
0	3	0	3	3	0	3	835
1386	369	342	519	1227	402	681	836
1350	357	333	519	1221	393	648	837
0	0	0	0	2	0	0	838
2	0	0	0	0	0	0	839
0	0	0	0	0	0	0	840
0	0	2	2	0	2	0	841
0	0	0	0	0	0	0	842
79	8	33	43	64	95	58	843
414	42	275	4204	220	100	268	844
65	13	9	2	41	5	12	845
1	2	2	3	0	0	2	846
945	244	318	1282	674	314	418	847
2	2	4	2	0	2	4	848
4	2	0	0	0	0	0	849
115	23	53	88	105	15	54	850
3	0	0	4	0	1	1	851
10428	4500	4884	14651	10548	3108	4344	852
7575	3447	3552	12672	8450	2547	2676	853
0	0	0	0	0	0	0	854
600	108	156	0	923	252	72	855
0	0	0	0	0	0	0	856
12	0	0	12	0	0	12	857
588	108	156	24	911	252	72	858
0	0	0	0	0	0	0	859
0	0	0	12	0	0	0	860
12	0	0	0	12	0	0	861
10545	4632	4984	15207	10689	3184	4360	862
0	0	0	0	12	12	0	863
0	0	0	0	0	0	0	864
0	0	0	0	0	0	0	865
0	0	0	0	0	4	0	866
864	464	448	1204	1996	312	560	867
0	0	0	2	0	0	0	868
920	386	440	1053	760	294	460	869
2	0	2	0	4	2	0	870
1672	544	584	2632	2402	708	1078	871
0	0	0	0	0	0	0	872
0	0	0	0	0	0	0	873
0	0	0	2	0	2	0	874
852	328	472	1408	1142	272	514	875
890	340	518	1419	1180	272	530	876
1838	451	519	1864	2384	831	1009	877
2	0	0	4	2	0	2	878
0	0	0	2	2	0	0	879
8	4	0	0	0	20	16	880
4	0	4	0	0	20	16	881
4247	1132	1194	4983	3104	1508	2032	882
4	0	0	0	4	20	20	883
0	0	0	0	2	0	0	884
24	4	9	0	0	16	12	885
0	0	0	0	2	0	0	886
0	216	292	0	0	0	0	887
0	220	292	0	0	0	0	888
4834	1115	1322	5260	2144	1491	1881	889
4914	1133	1329	5223	2176	1482	1884	890
4914	1125	1329	5244	2163	1494	1860	891
40	18	6	0	26	42	6	892
7744	1860	1996	8445	4367	1757	2411	893
55	50	0	15	45	60	20	894
55	50	0	15	45	55	15	895
35	50	0	0	40	55	0	896
9537	1931	2173	8043	5034	1940	2235	897
108	66	16	2	38	6	48	898
700	268	278	392	562	316	314	899
0	3	0	0	0	0	0	900
6537	1742	1850	6479	4171	2770	2781	901
0	3	0	0	3	0	3	902
0	1	1	2	0	0	1	903
3349	679	828	3298	3488	1224	1357	904
0	0	0	0	0	0	0	905
4	0	0	0	0	0	0	906
0	0	0	12	0	32	4	907
0	0	5	0	0	0	5	908
0	10	5	0	0	40	5	909
155	40	61	20	40	60	60	910
5	11	0	4	0	0	15	911
10	0	0	5	5	0	5	912
0	0	0	0	0	0	0	913
0	0	1	1	0	11	1	914
754	164	332	1510	858	234	340	915
0	0	0	0	0	0	0	916
4	0	0	4	2	0	0	917
0	0	0	4	4	4	0	918
0	0	0	0	0	3	15	919
1252	621	506	2011	1959	458	585	920
0	3	0	0	0	0	15	921
0	2	0	0	0	0	2	922
44	0	30	50	60	26	32	923
0	0	0	2	2	0	2	924
2	0	0	0	0	0	0	925
2619	693	677	2957	3139	1017	1067	926
0	0	0	6	0	0	0	927
0	4	3	0	0	0	0	928
4740	1006	1009	5730	6036	1533	1982	929
4557	956	987	5628	5889	1473	1935	930
956	332	350	1153	995	312	411	931
1404	336	368	1325	1678	550	584	932
45	15	15	0	12	30	6	933
2225	780	708	2601	2021	786	1236	934
2208	768	708	2586	2013	789	1239	935
3	0	0	0	0	0	0	936
1266	392	441	1396	1679	435	496	937
0	0	0	0	2	0	1	938
2	0	2	4	2	0	0	939
4	0	0	2	0	0	0	940
124	24	4	6	30	38	40	941
0	0	2	6	6	0	0	942
0	0	0	0	0	0	0	943
2	0	0	3	1	1	1	944
677	149	180	710	630	258	330	945
6	1	15	6	2	21	1	946
21	2	2	0	28	23	33	947
0	0	0	0	0	0	0	948
0	0	0	0	0	0	0	949
962	244	378	1071	1162	476	308	950
462	136	224	902	512	268	180	951
0	0	0	1	1	0	0	952
72	12	8	0	37	8	1	953
847	495	465	1446	1168	318	398	954
0	3	0	0	0	0	0	955
0	3	0	0	0	0	0	956
0	0	0	0	0	0	0	957
740	245	200	1929	1059	323	433	958
715	194	198	1900	1056	320	428	959
1	0	0	2	2	0	2	960
1205	193	196	1412	1462	400	470	961
550	182	203	941	669	239	373	962
2016	648	549	2823	2460	633	1122	963
0	0	0	9	0	3	0	964
3	3	0	3	0	0	0	965
4	0	0	2	0	0	4	966
0	0	0	2	0	2	0	967
0	0	0	4	4	0	0	968
0	0	0	0	0	0	0	969
1920	386	421	1827	1652	649	642	970
1219	469	373	1554	868	488	552	971
0	0	0	4	0	0	0	972
16	0	0	8	0	0	0	973
4	4	0	16	4	0	0	974
4479	1587	1407	6101	4492	1385	1445	975
0	0	0	0	0	0	0	976
398	150	196	662	428	158	148	977
0	2	0	4	0	0	2	978
2	2	0	2	2	0	0	979
1318	286	417	976	841	258	461	980
0	0	0	0	3	3	0	981
96	59	54	0	101	132	65	982
1983	565	549	2508	3194	658	945	983
0	2	0	0	0	0	0	984
1147	205	246	1707	628	471	535	985
0	0	0	0	2	0	0	986
1507	616	543	2053	2300	486	844	987
0	0	0	0	0	0	0	988
546	139	86	98	394	187	331	989
0	0	0	0	0	0	0	990
42	0	14	5	8	11	9	991
1630	322	382	1802	2275	657	666	992
188	52	60	140	460	112	144	993
0	0	0	0	32	0	0	994
2124	596	672	3140	4760	948	1076	995
0	4	4	0	0	0	0	996
65	6	13	0	53	2	5	997
1124	435	488	1386	1714	433	516	998
1	0	0	0	0	0	1	999
0	0	0	2	1	1	1	1000
0	0	0	0	0	0	0	1001
1	0	0	0	0	0	0	1002
711	318	356	870	784	288	290	1003
0	0	0	0	0	0	0	1004
6045	1594	1728	5970	4096	1278	1862	1005
2	0	0	2	4	0	0	1006
1	0	2	1	0	1	0	1007
1600	1411	1544	1829	1816	603	738	1008
3	0	0	2	0	1	3	1009
1842	340	354	1744	1276	550	765	1010
0	0	0	0	0	0	1	1011
3598	600	666	1530	2466	911	1582	1012
10220	1995	2054	8413	8767	3383	4542	1013
10214	2007	2054	8422	8767	3395	4536	1014
335	30	12	0	107	12	0	1015
11	0	0	20	55	21	10	1016
85	0	3	0	30	0	0	1017
3	3	0	5	0	2	0	1018
8	3	0	18	8	0	0	1019
4	0	0	4	2	0	0	1020
60	18	16	0	186	12	8	1021
8	0	1	2	6	5	2	1022
17	6	5	4	21	8	9	1023
0	0	0	0	1	1	0	1024
0	1	0	2	1	0	0	1025
0	0	0	0	4	0	2	1026
0	0	0	4	0	0	0	1027
3	0	3	3	6	0	0	1028
0	0	0	3	0	0	0	1029
0	0	0	0	3	0	0	1030
0	0	0	1	0	0	1	1031
6	0	2	0	0	0	0	1032
0	0	0	0	0	2	0	1033
0	0	0	0	0	0	0	1034
0	0	0	0	0	0	0	1035
2642	824	1016	3552	1686	1314	1248	1036
2	0	0	2	2	0	4	1037
0	0	0	0	0	0	0	1038
1290	526	454	1251	1086	276	558	1039
0	0	0	0	0	0	0	1040
0	0	0	0	0	0	0	1041
3	0	0	3	3	0	0	1042
3	0	0	0	0	0	3	1043
7431	1494	1550	6708	8637	3063	3768	1044
0	0	0	1	1	0	0	1045
1	0	0	0	0	0	0	1046
0	0	0	0	0	0	0	1047
0	0	0	0	0	0	0	1048
174	56	32	3	171	21	57	1049
174	56	32	3	171	21	57	1050
4	0	0	4	0	0	4	1051
3051	852	800	4072	2092	1048	1291	1052
227	76	40	20	248	36	68	1053
8	4	4	4	4	4	0	1054
0	0	0	6	0	0	0	1055
3	33	15	0	3	0	0	1056
0	0	0	3	0	3	3	1057
28	34	8	0	64	18	0	1058
532	428	398	1044	298	232	328	1059
0	2	0	4	0	0	0	1060
5102	1369	1509	6161	4584	2355	2236	1061
5105	1365	1509	6161	4590	2367	2236	1062
0	0	0	0	0	0	0	1063
0	0	0	0	0	0	0	1064
7197	1712	1735	6801	5732	2709	2917	1065
7204	1706	1735	6785	5736	2709	2910	1066
14	21	42	56	28	0	35	1067
7201	1702	1723	6788	5710	2709	2910	1068
14	21	42	56	28	0	35	1069
14	21	42	70	28	0	35	1070
3	3	1	4	3	0	1	1071
3	0	0	12	3	0	0	1072
174	81	30	3	78	39	18	1073
21	0	0	0	14	7	0	1074
154	43	70	0	243	42	21	1075
6969	1277	1413	7583	8103	1618	2100	1076
7018	1320	1448	7565	8269	1646	2107	1077
0	0	0	7	0	0	0	1078
0	0	0	0	0	0	0	1079
7	7	0	21	0	0	7	1080
0	0	0	0	2	0	0	1081
52	56	26	20	110	33	78	1082
780	186	156	0	1024	298	398	1083
6	0	0	6	6	0	0	1084
780	180	156	0	1006	298	406	1085
0	0	0	0	0	0	0	1086
12	0	0	0	0	0	0	1087
6	0	0	6	0	0	0	1088
490	215	120	30	865	120	200	1089
0	0	15	0	0	0	0	1090
5	5	0	0	0	0	0	1091
0	0	0	0	0	0	0	1092
0	5	0	25	12	0	10	1093
0	0	0	0	3	0	0	1094
0	0	0	0	0	0	0	1095
1611	303	312	1734	1617	318	687	1096
504	83	112	0	680	152	232	1097
0	8	0	0	0	0	0	1098
0	0	8	0	0	0	0	1099
8	0	0	0	0	0	0	1100
512	80	112	0	680	152	232	1101
0	0	0	0	0	32	0	1102
504	80	112	0	680	160	232	1103
0	0	0	0	0	0	0	1104
2	0	0	0	2	0	0	1105
4	0	0	4	3	0	0	1106
261	87	60	27	195	126	147	1107
2863	588	720	4512	2725	943	1190	1108
2872	591	720	4513	2723	946	1190	1109
226	56	44	6	198	132	126	1110
0	0	0	4	0	0	0	1111
1146	240	270	1390	1960	382	390	1112
4	2	0	26	12	0	2	1113
2	0	0	0	8	4	6	1114
1301	360	381	1703	2419	330	615	1115
0	0	0	0	0	0	0	1116
0	0	0	1	2	1	0	1117
41	7	8	22	10	17	18	1118
543	218	244	603	1051	252	263	1119
58	5	4	0	37	17	16	1120
1	0	0	0	1	0	6	1121
0	3	0	0	0	0	0	1122
0	0	0	0	0	0	0	1123
0	0	0	0	0	0	0	1124
0	2	0	4	0	2	2	1125
350	138	78	62	230	282	154	1126
0	0	0	33	22	0	11	1127
260	143	33	99	594	264	484	1128
22	0	11	44	22	11	22	1129
260	143	33	99	605	253	484	1130
0	0	0	11	0	11	0	1131
33	33	33	55	22	11	11	1132
22	0	11	11	0	11	11	1133
22	0	0	0	11	0	0	1134
275	143	33	110	627	264	495	1135
15133	4168	4375	17433	20753	6203	6573	1136
15412	4349	4486	17526	21343	6456	7060	1137
390	69	111	70	210	120	155	1138
159	84	40	0	410	120	195	1139
5	0	0	0	10	0	0	1140
6316	1928	1849	6974	8179	2526	2867	1141
0	0	0	0	0	0	0	1142
833	216	310	1113	1082	305	403	1143
8	3	2	0	31	0	0	1144
7490	1305	1495	7825	11875	2220	3010	1145
7485	1305	1495	7810	11865	2210	3014	1146
15	5	0	0	0	0	5	1147
5	0	0	0	15	0	0	1148
20	0	0	0	20	5	0	1149
1	0	0	1	1	0	0	1150
177	60	26	3	141	90	107	1151
645	130	132	99	736	222	258	1152
6573	1479	1638	5430	6381	1947	2412	1153
3450	806	904	3702	2998	1212	1498	1154
16	2	2	4	82	20	0	1155
2885	494	587	2890	2627	659	852	1156
0	0	0	0	0	0	0	1157
1206	398	421	1221	708	493	507	1158
4520	1188	1096	5176	5832	1896	2060	1159
344	92	72	16	419	104	151	1160
4439	1224	1078	5351	5955	1970	2069	1161
0	0	0	0	0	8	0	1162
746	302	450	1332	1984	350	476	1163
760	303	457	1362	2009	353	481	1164
0	0	0	0	0	1	0	1165
0	370	428	0	0	0	0	1166
0	0	0	0	0	0	0	1167
9834	2438	3185	10186	8169	2960	5184	1168
9	0	0	8	0	0	9	1169
9899	2453	3192	10255	8225	2960	5209	1170
9899	2445	3192	10255	8225	2960	5214	1171
63	18	18	9	216	0	198	1172
0	0	0	18	0	18	0	1173
0	20	0	0	18	0	0	1174
12646	3297	3952	12431	11067	4086	6421	1175
0	0	3	0	0	0	0	1176
1467	624	558	2040	1811	456	650	1177
0	1	0	1	0	0	1	1178
2336	530	627	1912	2014	1073	1181	1179
2	0	0	2	2	0	2	1180
66	12	2	0	16	32	28	1181
650	135	154	595	464	213	238	1182
0	0	0	0	0	0	0	1183
1	0	1	0	1	0	1	1184
38	2	2	0	58	12	2	1185
2	0	2	2	0	0	2	1186
1686	325	310	1418	1803	567	609	1187
369	113	132	463	591	81	165	1188
0	0	0	0	0	0	0	1189
0	0	0	4	0	0	0	1190
0	0	0	0	0	0	0	1191
0	0	0	0	0	0	0	1192
2272	426	474	2215	1929	751	1023	1193
1323	417	434	1926	1216	456	550	1194
253	74	66	30	541	180	214	1195
1885	389	407	1938	1940	561	734	1196
3342	856	970	4170	3865	1286	1697	1197
3464	885	995	4067	4027	1432	1748	1198
0	1	1	0	1	0	0	1199
0	0	0	0	0	0	0	1200
3	0	0	0	0	0	0	1201
21	24	3	0	150	42	72	1202
258	57	36	0	774	51	24	1203
0	0	0	0	0	0	0	1204
3	0	0	6	3	0	3	1205
0	3	0	6	0	0	0	1206
8889	1692	1728	10104	5172	3819	4770	1207
2	0	0	0	0	0	0	1208
0	0	0	0	0	0	0	1209
50	39	10	2	71	58	40	1210
0	18	7	0	0	0	0	1211
50	0	2	8	42	8	2	1212
2	2	4	0	2	4	4	1213
168	29	34	34	26	78	82	1214
4	0	0	0	4	0	0	1215
0	0	0	0	2	0	0	1216
0	0	0	2	0	0	0	1217
2	0	0	0	0	0	0	1218
4	0	6	0	2	0	2	1219
2	0	0	1	1	0	0	1220
0	0	0	0	2	0	0	1221
0	0	0	0	0	0	0	1222
1476	378	404	1615	1080	524	486	1223
4	0	0	4	0	0	0	1224
0	0	0	0	2	0	0	1225
64	6	8	0	68	32	6	1226
55	13	4	0	39	21	3	1227
85	23	16	2	97	50	34	1228
12	3	2	0	26	0	17	1229
0	0	0	0	0	0	0	1230
300	94	44	14	300	136	104	1231
304	94	44	14	303	135	106	1232
1	0	0	0	0	0	0	1233
8	0	4	8	6	4	0	1234
226	39	30	18	346	110	102	1235
2	0	0	0	1	0	0	1236
22	6	10	2	16	12	2	1237
1458	414	503	1813	1203	708	585	1238
0	0	0	0	0	0	0	1239
80	26	8	0	118	8	2	1240
0	0	0	0	2	0	0	1241
0	0	0	0	0	0	0	1242
2	0	0	4	2	0	0	1243
6134	1497	1692	6524	4414	1462	1848	1244
1	2	0	2	0	0	0	1245
1622	476	350	220	1070	570	578	1246
6299	1408	1791	5601	4469	1393	1647	1247
12	0	4	0	4	12	0	1248
8	4	12	20	8	8	0	1249
1	0	0	0	1	0	0	1250
1	0	0	0	0	0	0	1251
0	0	0	0	0	1	0	1252
0	3	0	2	6	0	0	1253
3	0	0	3	6	0	3	1254
0	0	0	0	3	0	0	1255
3170	2	1	2408	1794	877	956	1256
44	27	21	13	60	43	42	1257
794	204	252	1142	1044	190	340	1258
0	0	0	0	0	0	0	1259
12	8	8	2	36	22	0	1260
786	416	519	1810	922	438	620	1261
231	94	54	59	177	156	155	1262
26	3	4	2	14	12	4	1263
0	0	0	0	0	0	0	1264
0	0	0	1	0	0	0	1265
1025	446	549	1101	840	270	328	1266
0	0	0	1	1	0	0	1267
1	0	0	1	0	0	1	1268
0	0	0	0	0	0	0	1269
7076	1209	1421	8533	6113	2652	2984	1270
129	0	15	3	78	93	96	1271
30	6	8	8	14	26	26	1272
13	9	4	1	74	5	1	1273
3710	818	850	4357	2240	1016	1512	1274
3682	834	858	4308	2300	978	1450	1275
0	0	0	0	0	0	0	1276
1	0	1	1	1	0	0	1277
0	1	0	0	0	0	0	1278
1	0	0	0	0	0	0	1279
0	0	0	1	2	0	0	1280
1	0	1	0	0	0	1	1281
0	0	1	0	1	1	6	1282
2537	518	609	3165	2875	1015	1310	1283
0	0	0	0	0	0	0	1284
5	8	1	2	9	0	1	1285
27	0	45	15	0	18	11	1286
956	585	849	1466	1424	405	386	1287
0	0	0	6	0	0	0	1288
0	1	0	1	0	0	0	1289
654	140	163	989	1166	207	332	1290
0	0	0	0	0	0	0	1291
0	0	0	0	0	0	0	1292
0	0	0	0	2	0	0	1293
35	9	10	1	34	9	0	1294
1	0	0	1	1	0	0	1295
50	23	11	4	58	37	9	1296
0	0	0	0	0	0	0	1297
4	3	0	5	0	0	0	1298
0	0	0	5	3	0	0	1299
3	0	0	0	0	0	0	1300
0	0	1	0	0	0	0	1301
27	10	7	1	21	3	1	1302
228	53	102	466	369	114	133	1303
0	0	0	0	0	0	0	1304
20	5	10	1	7	26	0	1305
13	6	3	1	42	0	5	1306
0	0	0	0	2	0	0	1307
462	215	133	62	442	172	94	1308
0	0	0	0	0	0	0	1309
0	0	0	1	0	0	0	1310
1	0	0	0	0	0	0	1311
3851	1078	1341	4437	1666	1148	1398	1312
1676	502	426	354	858	562	640	1313
2586	507	649	2551	2783	1291	1383	1314
8	2	0	0	2	0	0	1315
0	0	0	2	0	0	0	1316
0	0	0	2	0	0	0	1317
0	0	0	6	0	0	10	1318
0	1	0	0	0	0	0	1319
1259	315	434	1627	636	414	592	1320
27	28	6	3	9	0	0	1321
54	0	57	96	32	51	29	1322
14	0	0	4	1	0	4	1323
13	5	0	2	14	0	0	1324
0	0	0	0	0	0	0	1325
2105	420	441	2033	2585	942	1133	1326
2424	808	839	3341	1016	1207	1358	1327
0	0	0	0	0	0	0	1328
42	6	15	4	22	15	13	1329
0	0	0	0	0	0	0	1330
0	2	1	0	1	0	0	1331
59	9	15	27	12	34	25	1332
8	3	1	1	8	6	11	1333
5121	1386	1292	4709	6201	1905	2650	1334
0	0	0	0	4	0	2	1335
7456	2496	2196	8016	8454	2900	3344	1336
23	8	4	12	8	0	0	1337
4	0	0	12	8	4	8	1338
1464	426	243	282	1362	395	366	1339
0	0	0	0	0	4	0	1340
0	1	0	2	0	0	0	1341
4	0	0	2	2	0	0	1342
0	0	0	0	0	0	0	1343
0	0	0	0	0	0	0	1344
3214	796	885	3519	2978	1386	1621	1345
1	2	2	0	2	0	0	1346
0	0	0	1	0	0	0	1347
135	28	40	28	142	63	93	1348
150	68	76	4	134	78	100	1349
1064	480	518	1874	1148	518	618	1350
0	0	0	0	4	0	0	1351
154	30	22	6	138	30	4	1352
1449	249	307	1219	1085	394	449	1353
1162	247	273	1304	1127	344	511	1354
0	0	0	4	0	0	0	1355
2	0	0	2	0	2	0	1356
25	0	0	0	9	19	0	1357
0	0	0	0	0	0	0	1358
28	10	10	1	27	2	21	1359
1	0	0	0	1	0	0	1360
3	0	0	6	1	1	1	1361
318	96	87	18	438	138	156	1362
6	0	0	0	0	0	0	1363
30	9	27	6	9	21	33	1364
63	20	5	6	46	48	28	1365
2	0	0	0	0	0	0	1366
22	20	4	0	40	8	14	1367
1	0	0	0	0	0	0	1368
221	32	68	327	207	65	92	1369
0	0	0	2	0	0	0	1370
0	0	0	20	5	0	0	1371
14	0	0	30	30	0	0	1372
2775	515	715	2618	2524	575	735	1373
0	0	0	0	0	0	5	1374
10	0	0	5	5	0	0	1375
5852	1156	1706	5970	4426	1870	1890	1376
6	0	0	6	0	0	0	1377
6	0	0	16	0	0	6	1378
0	0	0	6	0	0	0	1379
0	6	0	0	0	0	0	1380
6	0	0	0	6	0	0	1381
0	0	0	0	0	0	0	1382
320	144	40	38	208	4	96	1383
320	144	40	36	208	4	100	1384
0	0	0	0	0	0	4	1385
0	0	0	0	0	4	2	1386
0	2	0	0	0	0	0	1387
673	127	155	54	263	166	157	1388
2	1	3	1	1	1	2	1389
0	0	0	0	0	0	0	1390
0	0	0	0	0	0	0	1391
611	138	182	672	574	211	328	1392
1	0	0	1	0	0	0	1393
0	0	0	0	0	0	0	1394
943	147	200	890	880	321	398	1395
2659	659	834	2750	3111	1153	2039	1396
0	0	0	0	0	0	0	1397
0	0	0	4	0	0	0	1398
264	132	96	8	416	160	172	1399
56	22	16	32	22	8	22	1400
0	0	0	0	0	0	0	1401
1	1	0	1	0	0	2	1402
21	1	6	4	20	8	5	1403
4	0	5	12	0	0	0	1404
4579	1830	1822	5614	4337	1760	2152	1405
4	0	4	0	0	0	0	1406
4	8	0	0	8	0	0	1407
37	17	4	0	31	11	11	1408
0	0	0	0	0	0	0	1409
0	0	0	0	0	0	0	1410
0	0	0	0	1	0	0	1411
0	1	1	0	0	0	0	1412
0	0	0	0	0	0	0	1413
1704	280	478	1820	1500	364	646	1414
1	0	0	0	0	0	1	1415
0	0	0	2	2	1	0	1416
4	0	0	4	7	0	0	1417
108	30	16	40	236	38	60	1418
52	18	14	6	10	26	80	1419
42	6	2	2	4	0	0	1420
0	0	1	0	0	0	0	1421
26	6	2	1	33	7	14	1422
2206	620	724	2781	1546	612	832	1423
1	0	0	1	0	0	0	1424
3526	1058	1231	3478	4101	1702	1967	1425
3378	1014	1202	3399	4060	1608	1852	1426
1	0	0	1	1	0	1	1427
2	0	0	0	2	0	0	1428
0	0	0	2	0	0	2	1429
0	0	0	1	0	0	0	1430
77	11	6	3	32	49	64	1431
6851	835	974	5758	8108	2156	2652	1432
182	20	12	24	128	92	76	1433
0	0	0	2	2	0	0	1434
0	2	0	2	0	0	0	1435
2	0	0	2	1	0	0	1436
0	0	0	1	0	0	0	1437
0	0	1	1	0	0	0	1438
982	179	244	1103	1534	362	390	1439
69	31	15	3	56	31	70	1440
1	0	0	0	0	0	0	1441
0	0	0	0	0	0	0	1442
1	1	0	2	2	0	2	1443
3132	606	609	5448	2583	861	1077	1444
2394	483	518	5313	1919	603	841	1445
3363	784	683	5466	3062	915	1381	1446
2	0	0	2	2	0	0	1447
0	0	0	0	0	0	0	1448
3	0	0	6	0	3	0	1449
1806	789	857	1944	2040	645	991	1450
1838	810	866	1983	2073	645	989	1451
22	4	2	1	15	3	1	1452
0	0	0	0	0	0	0	1453
23	6	3	0	13	19	3	1454
1368	339	395	1468	911	637	762	1455
2892	596	706	2540	1718	1154	1294	1456
2772	576	678	2542	1668	1074	1240	1457
2	0	0	0	0	0	0	1458
0	0	0	1	0	0	0	1459
1	0	0	0	0	0	1	1460
1133	304	342	1256	1585	449	600	1461
0	224	424	0	0	0	0	1462
33	22	14	0	9	19	14	1463
1	0	0	0	0	2	0	1464
32	6	2	0	12	38	22	1465
0	0	0	0	0	0	0	1466
0	0	0	0	0	0	0	1467
838	140	193	1009	646	270	315	1468
451	229	307	780	312	231	287	1469
12	2	8	0	0	16	28	1470
12	1	1	1	21	9	3	1471
1	0	0	0	0	0	1	1472
1624	480	621	2078	1207	633	928	1473
0	0	0	0	0	0	0	1474
0	0	0	0	0	0	0	1475
1460	396	440	1854	2318	564	538	1476
0	0	0	0	4	0	2	1477
5100	1066	1164	5344	4715	1828	2110	1478
0	0	0	4	0	0	0	1479
9	0	3	6	3	3	3	1480
890	236	276	1047	636	370	367	1481
112	48	114	142	100	82	204	1482
2	0	0	0	0	0	0	1483
5	0	5	10	5	0	10	1484
30	10	0	5	0	0	20	1485
1605	543	596	1013	495	630	787	1486
3331	1033	1010	1580	807	1127	1248	1487
9011	3453	3467	11949	2669	3156	4277	1488
4066	784	826	3548	3526	1338	1704	1489
3582	730	740	3452	3226	1173	1571	1490
2	0	0	2	0	0	2	1491
0	1	0	1	8	4	0	1492
0	0	0	1	1	0	0	1493
0	0	0	1	1	0	1	1494
3510	828	730	3124	5192	1168	1268	1495
2264	580	498	2631	3638	734	814	1496
5	1	0	2	3	0	1	1497
0	0	0	0	0	0	0	1498
0	0	0	0	0	0	0	1499
0	0	0	0	1	0	0	1500
0	0	0	0	0	0	0	1501
0	0	0	0	0	0	0	1502
50	10	1	1	81	23	2	1503
0	0	0	0	0	0	0	1504
629	193	244	949	499	202	288	1505
633	137	163	883	1475	139	316	1506
1621	488	536	2181	1729	479	686	1507
86	38	17	4	94	46	32	1508
3170	548	640	3114	2768	1050	1254	1509
269	110	128	202	271	138	160	1510
9	0	0	3	0	3	0	1511
1227	443	364	600	474	525	611	1512
3805	1044	1082	4509	1260	1901	2094	1513
1	0	0	0	0	0	0	1514
0	0	5	0	5	0	0	1515
0	0	5	0	10	0	0	1516
5249	1517	1601	5222	6309	1788	1969	1517
0	0	0	0	5	0	0	1518
5266	1504	1598	5259	6330	1791	1976	1519
4	0	0	0	2	0	2	1520
2	0	0	0	2	0	2	1521
0	92	117	0	0	0	0	1522
92	31	52	130	88	43	52	1523
0	0	0	1	2	0	0	1524
0	0	0	0	0	0	0	1525
2468	530	578	3162	2018	1064	1106	1526
0	0	0	2	0	2	0	1527
10	3	0	0	2	2	1	1528
435	81	95	237	279	171	215	1529
0	0	0	0	0	0	0	1530
0	2	0	0	0	0	0	1531
2	1	1	1	2	0	0	1532
332	54	108	230	212	120	262	1533
0	0	2	0	0	2	4	1534
0	0	0	2	0	0	0	1535
1307	269	302	1453	1507	398	477	1536
0	0	0	0	0	0	0	1537
0	4	0	2	0	0	0	1538
0	0	0	0	0	0	0	1539
1264	448	400	1760	1628	228	432	1540
1268	440	400	1756	1628	224	436	1541
1808	552	580	2020	2110	344	700	1542
1922	629	650	2075	2375	371	774	1543
0	0	0	0	2	0	0	1544
0	0	0	0	2	0	0	1545
0	0	0	0	0	0	0	1546
0	9	0	0	6	0	0	1547
0	0	0	0	0	0	6	1548
0	0	0	0	0	0	0	1549
1	0	2	0	0	0	1	1550
105	49	28	0	324	42	14	1551
0	7	0	0	0	0	0	1552
840	231	201	567	917	343	371	1553
28	28	42	28	35	14	7	1554
840	231	205	567	917	349	371	1555
847	231	219	560	910	349	371	1556
116	28	33	108	124	24	30	1557
958	306	404	1401	1203	511	564	1558
1657	384	391	2244	1631	759	719	1559
745	307	350	961	593	236	310	1560
0	0	0	2	0	0	0	1561
36	4	12	4	48	14	10	1562
23	7	10	11	70	10	16	1563
1015	292	380	1486	1688	470	425	1564
0	0	0	0	0	0	0	1565
3520	866	1000	4396	4319	1925	2059	1566
0	0	0	0	0	0	0	1567
4202	1076	1476	4886	4065	1196	1525	1568
126	22	20	2	86	10	16	1569
0	1	1	2	0	0	0	1570
3625	480	610	3176	2946	1012	1652	1571
2820	382	462	2411	2284	800	1092	1572
24	12	15	24	42	6	0	1573
0	0	0	3	0	0	0	1574
2168	378	557	2479	2446	758	805	1575
4	0	0	2	4	0	0	1576
0	0	0	2	0	0	0	1577
1634	340	484	1950	1798	796	926	1578
0	0	0	0	0	2	0	1579
40	7	11	0	10	10	7	1580
502	102	154	1068	514	170	232	1581
0	0	0	2	0	0	0	1582
76	22	12	0	90	12	12	1583
386	108	180	494	318	164	196	1584
1	0	0	4	1	0	0	1585
331	109	141	617	621	142	197	1586
4965	861	1041	5241	6078	1752	1875	1587
0	3	0	3	3	3	0	1588
3	3	3	0	9	3	6	1589
0	0	0	0	0	0	0	1590
601	146	166	1186	679	196	208	1591
0	0	0	2	0	0	0	1592
3284	674	823	3256	3192	1145	1499	1593
4	0	0	0	0	0	0	1594
0	0	0	4	0	0	0	1595
2	0	0	6	2	0	0	1596
1417	334	356	1427	1116	562	606	1597
0	2	0	2	0	0	1	1598
3732	720	840	3356	3546	1718	1760	1599
3696	720	828	3362	3525	1689	1715	1600
485	319	245	791	633	178	234	1601
10	6	0	1	30	0	8	1602
204	52	57	275	177	65	76	1603
753	190	213	836	816	249	337	1604
4	0	0	2	16	12	0	1605
0	0	0	0	22	0	2	1606
1536	421	515	1907	1965	459	703	1607
605	147	140	1140	838	202	184	1608
0	0	0	0	0	0	0	1609
2466	632	718	2891	3306	1172	1354	1610
434	112	108	282	254	131	171	1611
0	0	0	0	0	0	0	1612
0	0	0	0	2	2	2	1613
2	0	2	2	18	8	10	1614
536	157	268	1358	291	209	237	1615
1	0	0	0	1	1	0	1616
0	0	0	0	0	0	0	1617
0	1	1	4	1	0	2	1618
0	0	0	1	0	0	0	1619
596	197	240	549	644	192	298	1620
0	0	0	1	0	0	0	1621
41	186	268	73	132	20	22	1622
0	0	0	0	0	0	0	1623
21	16	8	0	100	36	24	1624
416	52	88	48	271	244	256	1625
5184	1163	1148	4967	5183	2132	2932	1626
84	8	8	4	16	20	44	1627
1339	183	261	1334	1261	395	536	1628
0	0	0	2	1	0	0	1629
0	0	1	2	2	0	2	1630
1	1	0	1	1	1	0	1631
2	0	0	3	3	0	2	1632
1401	348	363	1584	1931	546	630	1633
0	0	0	1	0	0	0	1634
1943	366	346	2049	1649	700	927	1635
0	0	0	1	1	1	0	1636
570	128	178	774	666	259	269	1637
0	0	0	0	0	1	0	1638
0	1	0	0	6	0	7	1639
320	50	88	279	267	83	173	1640
1900	490	521	2315	1493	424	744	1641
900	248	256	984	661	171	356	1642
2442	691	762	2640	3082	968	1148	1643
1430	448	476	1964	2210	482	652	1644
2640	660	714	1916	1284	866	1076	1645
2	2	0	2	0	0	0	1646
3423	1146	1092	3744	2649	1362	1323	1647
2538	816	690	2988	1878	1038	933	1648
3410	1178	1078	3746	2667	1374	1330	1649
617	172	202	835	270	174	356	1650
0	1	0	0	0	0	0	1651
0	3	0	0	0	0	0	1652
1086	291	324	654	786	288	474	1653
48	9	3	3	21	18	0	1654
1	0	1	1	3	0	3	1655
6	0	0	8	2	0	0	1656
1994	545	788	2394	1728	1079	1107	1657
2	2	0	0	2	0	0	1658
926	184	264	930	982	198	446	1659
489	96	142	67	373	125	87	1660
21	3	0	0	30	0	0	1661
0	0	3	0	0	0	6	1662
6577	2025	1859	7525	7540	1624	2238	1663
13	5	1	6	46	0	7	1664
0	0	0	0	0	0	0	1665
0	2	0	0	0	0	0	1666
0	0	2	1	1	0	0	1667
156	43	88	92	114	40	52	1668
0	0	0	0	0	0	0	1669
0	0	0	0	0	0	0	1670
2915	1011	859	3321	4856	899	1442	1671
955	450	455	1170	972	231	576	1672
2	0	0	0	0	0	0	1673
0	0	0	1	0	0	0	1674
0	0	0	0	0	0	0	1675
0	2	0	2	2	0	0	1676
0	0	0	2	0	0	0	1677
104	26	17	30	63	14	13	1678
1	0	0	0	0	0	0	1679
0	0	0	2	0	0	0	1680
0	2	0	0	0	0	0	1681
155	38	31	9	91	50	61	1682
0	0	0	3	0	0	0	1683
77	15	12	0	92	12	14	1684
6	0	2	6	6	2	2	1685
2	3	2	0	12	2	0	1686
0	0	2	2	0	0	0	1687
417	93	94	71	415	100	100	1688
0	1	0	0	2	0	0	1689
0	0	0	0	0	0	0	1690
4385	864	985	3548	3335	1575	1898	1691
0	3	8	2	0	3	0	1692
414	84	48	9	339	171	165	1693
8	0	0	1	2	4	0	1694
3814	967	1049	3791	3589	993	1199	1695
2	0	0	3	0	0	2	1696
0	0	0	0	1	1	0	1697
0	1	3	1	2	0	1	1698
54	15	19	1	72	34	36	1699
0	0	0	0	0	0	0	1700
22	24	10	8	40	4	14	1701
178	64	82	272	196	68	50	1702
236	25	21	10	116	151	81	1703
1502	510	468	1312	945	417	484	1704
4	1	2	6	0	0	0	1705
2	0	0	0	0	0	0	1706
511	75	72	6	363	98	138	1707
0	0	0	0	0	0	1	1708
39	5	15	12	25	27	39	1709
0	0	0	6	0	0	0	1710
0	0	2	4	2	0	2	1711
170	152	221	223	260	62	108	1712
0	0	2	2	2	0	0	1713
1	0	0	0	0	0	1	1714
0	2	0	0	0	0	0	1715
1701	659	597	2434	2819	782	808	1716
0	0	0	4	0	0	0	1717
0	0	0	0	0	0	0	1718
188	78	50	64	198	52	60	1719
0	0	0	0	0	0	0	1720
1397	623	683	1704	2096	779	944	1721
188	68	80	484	214	56	228	1722
188	70	76	486	214	56	230	1723
0	0	0	2	2	0	0	1724
0	0	4	5	6	2	0	1725
0	0	1	0	2	1	0	1726
1996	478	474	2052	2257	624	875	1727
2	1	0	2	0	1	0	1728
2	0	0	0	2	0	0	1729
6141	1875	2185	7585	7763	1968	2392	1730
343	88	149	474	430	145	283	1731
40	4	1	0	29	4	1	1732
0	1	0	3	1	0	1	1733
0	0	0	0	1	0	2	1734
0	5	0	0	0	0	0	1735
2	0	0	2	6	0	0	1736
3195	1050	978	3827	3703	1188	1263	1737
2976	987	909	3768	3564	1059	1215	1738
3201	1044	975	3792	3744	1233	1275	1739
0	2	0	0	0	0	4	1740
108	52	16	15	80	74	38	1741
0	0	0	0	0	0	0	1742
0	0	0	0	0	0	0	1743
497	154	186	640	399	208	354	1744
0	0	0	0	0	0	1	1745
0	0	0	0	0	0	0	1746
373	148	107	461	522	107	103	1747
1	0	0	2	0	0	0	1748
0	0	0	0	1	0	1	1749
149	22	21	1	68	21	23	1750
15	8	2	2	16	2	0	1751
0	0	0	0	0	0	0	1752
1	0	0	0	2	0	0	1753
3452	1369	1637	5079	2796	1142	1560	1754
5585	2151	2643	7101	4107	2076	2754	1755
0	0	0	15	6	0	0	1756
0	1	0	0	0	0	0	1757
0	0	0	0	0	0	0	1758
269	85	123	384	330	75	136	1759
2	0	0	4	0	0	0	1760
4	0	2	6	0	0	0	1761
0	0	0	0	0	1	0	1762
0	0	0	0	0	0	0	1763
0	2	0	0	0	0	0	1764
862	224	240	1080	822	220	404	1765
0	0	0	0	0	0	0	1766
1	0	2	4	0	0	1	1767
632	144	162	1083	1007	248	323	1768
1176	286	337	1230	950	463	610	1769
11	1	1	0	7	1	0	1770
1	0	0	3	0	0	0	1771
0	0	1	1	0	0	4	1772
2	4	0	9	0	0	1	1773
4	0	0	0	0	0	0	1774
2750	488	620	3446	2412	882	1010	1775
0	0	1	1	1	0	0	1776
0	0	0	1	2	0	0	1777
1238	407	516	1888	1493	456	542	1778
6	0	3	6	3	0	0	1779
2371	606	438	359	1209	498	871	1780
6935	1628	2055	7979	2890	1381	1952	1781
2	3	3	1	10	7	13	1782
408	146	90	94	376	128	212	1783
812	201	264	963	588	296	303	1784
0	0	0	4	0	2	0	1785
654	136	128	1193	458	239	216	1786
358	104	145	464	569	189	221	1787
829	231	333	1520	1201	336	355	1788
0	0	0	0	0	0	0	1789
31	0	6	11	2	15	7	1790
3	0	0	2	1	0	0	1791
3	0	0	0	0	0	0	1792
2393	653	870	2753	1364	843	985	1793
2351	630	831	2691	1374	849	954	1794
2352	630	837	2694	1374	846	954	1795
1	0	0	1	0	1	0	1796
2	4	0	0	2	0	0	1797
160	10	46	110	48	56	70	1798
108	18	9	0	105	3	12	1799
1055	476	427	441	1058	429	558	1800
0	0	0	0	0	0	3	1801
181	44	33	4	241	52	67	1802
4	0	0	4	2	2	4	1803
4	2	8	2	0	2	0	1804
2494	568	634	2206	1803	1054	1252	1805
16	0	13	10	9	3	7	1806
0	0	0	0	0	5	0	1807
0	0	0	0	0	0	0	1808
5120	1078	1260	7511	4676	1876	2352	1809
5	0	5	5	0	0	0	1810
5	0	0	0	0	0	5	1811
10	4	1	1	39	5	0	1812
0	0	0	0	1	0	0	1813
50	23	5	3	6	6	12	1814
356	77	58	13	64	70	38	1815
3309	988	1116	3340	818	831	1075	1816
2	1	1	1	0	1	0	1817
0	0	0	0	0	0	0	1818
0	0	0	0	0	0	0	1819
1	0	0	0	0	0	1	1820
547	100	120	627	468	136	237	1821
18	2	2	0	12	0	2	1822
1880	468	622	3470	864	868	732	1823
56	19	15	5	55	29	24	1824
1210	669	770	1279	1106	515	461	1825
0	0	0	0	0	2	0	1826
2934	557	918	3900	2151	1047	1316	1827
81	3	19	0	60	9	24	1828
3306	738	1034	3937	2733	1461	1657	1829
1	0	0	0	0	1	0	1830
0	0	1	0	0	0	1	1831
315	74	140	349	376	142	161	1832
0	0	0	0	0	0	0	1833
64	28	14	0	122	24	32	1834
372	98	110	116	324	86	142	1835
372	98	110	117	326	86	143	1836
0	0	0	2	0	0	2	1837
0	0	0	0	2	0	0	1838
551	213	212	819	582	244	335	1839
2012	520	764	4000	1528	1140	1272	1840
4667	1272	1291	4885	3975	2675	2800	1841
354	148	16	0	417	144	108	1842
350	148	16	0	417	144	108	1843
1	1	1	0	0	0	0	1844
62	18	14	24	76	46	20	1845
0	0	0	4	0	0	2	1846
558	170	336	1374	608	210	246	1847
0	2	2	4	4	0	0	1848
25	7	1	1	19	12	0	1849
778	175	124	261	869	341	463	1850
0	0	0	0	0	0	0	1851
682	230	256	689	1646	208	248	1852
4	93	108	0	2	0	0	1853
0	15	51	0	0	0	0	1854
2	0	1	3	1	0	1	1855
0	0	0	0	0	0	0	1856
1782	550	472	740	1206	546	818	1857
0	0	0	0	0	0	0	1858
0	2	6	2	2	0	0	1859
4	0	0	0	0	0	0	1860
2	0	0	2	2	2	0	1861
4744	930	1000	4340	3322	1662	2138	1862
0	0	0	3	1	0	0	1863
1789	543	562	2737	531	452	506	1864
528	245	251	702	314	144	264	1865
864	326	447	1154	905	255	348	1866
111	66	162	364	89	29	55	1867
5145	1730	2341	7145	1638	1434	2076	1868
979	418	231	240	328	438	573	1869
3135	1774	2352	4386	861	952	1383	1870
12	6	3	0	7	0	8	1871
0	0	0	0	0	0	0	1872
0	0	0	0	3	1	0	1873
0	1	1	1	1	0	0	1874
0	0	0	0	0	0	0	1875
0	2	0	0	0	0	0	1876
0	0	0	2	0	0	0	1877
0	0	2	2	0	2	0	1878
0	2	1	1	0	0	0	1879
5528	1206	1594	3234	2181	1252	1814	1880
9782	2389	3060	11626	4969	2259	3139	1881
8	0	0	16	12	0	12	1882
4	0	0	12	4	0	0	1883
57	21	39	45	170	30	54	1884
1794	352	480	2072	3216	612	920	1885
2	2	0	0	0	2	0	1886
400	104	114	1184	578	64	126	1887
398	104	114	1180	578	64	124	1888
2446	646	680	2876	1366	792	1226	1889
2	0	0	0	0	0	0	1890
80	29	60	6	94	70	74	1891
0	15	20	5	0	0	0	1892
0	0	15	15	0	0	0	1893
10	0	0	15	0	0	5	1894
0	0	0	0	0	0	0	1895
1020	262	231	1689	534	526	586	1896
5	0	0	10	0	0	15	1897
0	0	0	10	0	0	0	1898
1330	368	586	3875	1465	480	435	1899
5	0	0	0	10	0	10	1900
4347	1246	1568	5375	5902	1690	2085	1901
0	18	0	0	0	0	0	1902
5984	870	1041	5574	6182	1454	2467	1903
0	0	0	0	0	0	0	1904
4842	624	780	4619	5134	1080	2044	1905
2062	676	752	2266	2468	636	960	1906
3	0	0	10	0	3	3	1907
126	32	88	458	125	56	46	1908
1224	453	342	438	1695	483	711	1909
464	133	138	457	375	166	190	1910
0	5	0	0	0	0	0	1911
0	0	0	0	0	0	2	1912
2	0	0	0	0	0	0	1913
0	0	0	0	0	0	0	1914
88	29	9	1	76	31	24	1915
3423	899	1139	5223	3015	1265	1794	1916
0	0	0	0	0	0	0	1917
255	57	81	2	228	90	162	1918
7446	1725	1956	9124	7715	1824	2563	1919
9044	1995	2514	10372	9157	2160	3203	1920
450	162	105	18	612	207	189	1921
693	300	313	945	1223	294	328	1922
0	0	0	0	0	0	0	1923
2073	575	813	3306	2073	571	895	1924
1	0	1	2	0	0	0	1925
947	181	250	1126	792	310	328	1926
18	21	12	9	48	3	6	1927
2052	576	558	1923	2865	621	795	1928
0	0	0	0	0	0	0	1929
0	0	4	4	2	0	4	1930
681	332	569	1847	706	312	490	1931
47	8	16	50	27	15	27	1932
1	0	0	1	1	0	3	1933
0	0	0	0	0	0	0	1934
0	0	0	0	0	0	0	1935
0	0	2	0	0	0	2	1936
0	2	0	0	0	0	0	1937
142	33	41	138	241	69	50	1938
253	87	64	51	328	84	183	1939
2	1	0	5	1	1	5	1940
0	0	0	1	0	0	0	1941
472	162	208	695	968	158	294	1942
36	12	25	6	105	16	8	1943
3	0	3	4	1	0	2	1944
0	0	1	0	0	0	0	1945
377	104	169	953	351	154	108	1946
3062	738	945	4096	1644	900	1016	1947
2286	568	762	2458	1106	569	894	1948
0	120	172	0	0	0	0	1949
0	0	0	1	0	0	0	1950
6410	1350	1830	6420	7770	2635	2655	1951
7579	1826	1997	6531	9560	3323	3833	1952
5	0	0	0	0	0	0	1953
15	0	5	30	30	0	0	1954
15	0	0	10	9	0	0	1955
0	0	0	0	0	0	0	1956
0	0	0	0	0	0	0	1957
0	0	0	0	0	0	0	1958
0	0	0	0	0	0	4	1959
0	0	0	0	0	0	0	1960
0	4	0	0	0	0	0	1961
0	30	31	0	2	0	0	1962
0	1	0	2	2	0	1	1963
0	1	0	0	0	0	0	1964
3	0	0	2	3	1	1	1965
0	0	0	0	0	0	0	1966
12	212	396	12	68	36	44	1967
4	4	0	0	4	4	4	1968
0	0	0	0	4	0	0	1969
4	0	4	0	0	0	0	1970
4	0	0	0	0	0	0	1971
20	4	0	0	22	0	4	1972
0	2	2	2	0	2	0	1973
2	0	0	2	0	2	0	1974
3911	1319	1474	5189	4001	2171	2715	1975
0	0	0	0	0	0	0	1976
6	3	9	0	0	0	3	1977
285	30	21	9	72	60	81	1978
3441	705	1195	6950	1290	714	795	1979
12	0	0	14	0	0	3	1980
1604	792	695	2016	1036	556	748	1981
4	0	0	0	0	24	0	1982
0	0	0	0	0	0	0	1983
0	4	0	0	4	0	0	1984
902	259	297	758	1009	417	374	1985
1582	524	565	791	1331	678	713	1986
0	0	0	0	0	0	0	1987
0	0	0	4	0	0	0	1988
12	0	0	0	0	8	8	1989
45	4	7	0	11	17	12	1990
1193	291	379	1093	895	473	524	1991
27	8	4	1	18	3	3	1992
2	0	0	0	7	0	0	1993
0	0	3	0	0	0	0	1994
70	3	6	24	12	15	54	1995
527	192	213	140	469	227	168	1996
150	52	42	34	146	26	42	1997
18	6	12	0	26	16	14	1998
1	0	5	9	1	0	0	1999
[truncated: 117,994 more rows]

## Sheet: UniqueSNPs_perStrain
snp.id	total	count	strain	exp.id	snp.idx
963347	2332	10	AB1	R2D14ind	3411
964837	8804	63	AB1	R2D14ind	4901
969233	3592	14	AB1	R2D14ind	9297
973680	4766	44	AB1	R2D14ind	13744
976012	3950	15	AB1	R2D14ind	16076
976716	1848	19	AB1	R2D14ind	16780
987060	1438	18	AB1	R2D14ind	27124
992988	7623	44	AB1	R2D14ind	33052
1006675	1551	10	AB1	R2D14ind	46739
1027889	1232	6	AB1	R2D14ind	67953
1028472	1296	6	AB1	R2D14ind	68536
1031907	1967	21	AB1	R2D14ind	71971
1037654	3356	12	AB1	R2D14ind	77718
1037896	1093	7	AB1	R2D14ind	77960
1050203	2130	19	AB1	R2D14ind	90267
1052892	2855	36	AB1	R2D14ind	92956
1054406	3585	24	AB1	R2D14ind	94470
1057592	1672	12	AB1	R2D14ind	97656
1061273	1336	8	AB1	R2D14ind	101337
1065657	4259	46	AB1	R2D14ind	105721
1066235	3855	0	AB1	R2D14ind	106299
1077099	2512	33	AB1	R2D14ind	117163
1083339	505	7	AB1	R2D1ind	3411
1084829	1670	7	AB1	R2D1ind	4901
1089225	892	6	AB1	R2D1ind	9297
1093672	1327	24	AB1	R2D1ind	13744
1096004	1047	24	AB1	R2D1ind	16076
1096708	431	9	AB1	R2D1ind	16780
1107052	478	6	AB1	R2D1ind	27124
1112980	2348	24	AB1	R2D1ind	33052
1126667	470	0	AB1	R2D1ind	46739
1147881	335	4	AB1	R2D1ind	67953
1148464	531	5	AB1	R2D1ind	68536
1151899	567	1	AB1	R2D1ind	71971
1157646	496	8	AB1	R2D1ind	77718
1157888	235	6	AB1	R2D1ind	77960
1170195	679	8	AB1	R2D1ind	90267
1172884	918	12	AB1	R2D1ind	92956
1174398	638	8	AB1	R2D1ind	94470
1177584	575	6	AB1	R2D1ind	97656
1181265	337	2	AB1	R2D1ind	101337
1185649	843	10	AB1	R2D1ind	105721
1186227	1547	16	AB1	R2D1ind	106299
1197091	680	9	AB1	R2D1ind	117163
1203331	586	1	AB1	R2D21ind	3411
1204821	1875	7	AB1	R2D21ind	4901
1209217	904	4	AB1	R2D21ind	9297
1213664	1573	4	AB1	R2D21ind	13744
1215996	1150	0	AB1	R2D21ind	16076
1216700	450	1	AB1	R2D21ind	16780
1227044	442	1	AB1	R2D21ind	27124
1232972	2724	8	AB1	R2D21ind	33052
1246659	553	3	AB1	R2D21ind	46739
1267873	371	1	AB1	R2D21ind	67953
1268456	518	0	AB1	R2D21ind	68536
1271891	625	1	AB1	R2D21ind	71971
1277638	612	8	AB1	R2D21ind	77718
1277880	264	2	AB1	R2D21ind	77960
1290187	697	1	AB1	R2D21ind	90267
1292876	1116	6	AB1	R2D21ind	92956
1294390	650	3	AB1	R2D21ind	94470
1297576	586	0	AB1	R2D21ind	97656
1301257	351	0	AB1	R2D21ind	101337
1305641	831	6	AB1	R2D21ind	105721
1306219	1452	0	AB1	R2D21ind	106299
1317083	661	5	AB1	R2D21ind	117163
1323323	2440	0	AB1	R2D24ind	3411
1324813	8478	7	AB1	R2D24ind	4901
1329209	3540	4	AB1	R2D24ind	9297
1333656	5082	20	AB1	R2D24ind	13744
1335988	4512	0	AB1	R2D24ind	16076
1336692	1597	0	AB1	R2D24ind	16780
1347036	1740	0	AB1	R2D24ind	27124
1352964	6620	20	AB1	R2D24ind	33052
1366651	1755	0	AB1	R2D24ind	46739
1387865	1405	1	AB1	R2D24ind	67953
1388448	1735	0	AB1	R2D24ind	68536
1391883	2211	1	AB1	R2D24ind	71971
1397630	3349	0	AB1	R2D24ind	77718
1397872	1601	0	AB1	R2D24ind	77960
1410179	2007	0	AB1	R2D24ind	90267
1412868	3255	3	AB1	R2D24ind	92956
1414382	2704	3	AB1	R2D24ind	94470
1417568	2134	2	AB1	R2D24ind	97656
1421249	1645	1	AB1	R2D24ind	101337
1425633	4315	22	AB1	R2D24ind	105721
1426211	4407	0	AB1	R2D24ind	106299
1437075	2262	0	AB1	R2D24ind	117163
1443315	819	11	AB1	R2D7ind	3411
1444805	6611	14	AB1	R2D7ind	4901
1449201	3610	78	AB1	R2D7ind	9297
1453648	6437	72	AB1	R2D7ind	13744
1455980	5281	51	AB1	R2D7ind	16076
1456684	1440	29	AB1	R2D7ind	16780
1467028	1710	22	AB1	R2D7ind	27124
1472956	3004	48	AB1	R2D7ind	33052
1486643	1740	0	AB1	R2D7ind	46739
1507857	1535	17	AB1	R2D7ind	67953
1508440	2770	42	AB1	R2D7ind	68536
1511875	2981	25	AB1	R2D7ind	71971
1517622	2392	36	AB1	R2D7ind	77718
1517864	1193	7	AB1	R2D7ind	77960
1530171	1977	30	AB1	R2D7ind	90267
1532860	651	0	AB1	R2D7ind	92956
1534374	3735	48	AB1	R2D7ind	94470
1537560	2172	52	AB1	R2D7ind	97656
1541241	2571	17	AB1	R2D7ind	101337
1545625	4238	63	AB1	R2D7ind	105721
1546203	4598	108	AB1	R2D7ind	106299
1557067	3651	52	AB1	R2D7ind	117163
1563307	891	12	AB1	RID16ind	3411
1564797	2475	152	AB1	RID16ind	4901
1569193	1598	20	AB1	RID16ind	9297
1573640	2490	24	AB1	RID16ind	13744
1575972	1224	24	AB1	RID16ind	16076
1576676	608	9	AB1	RID16ind	16780
1587020	516	31	AB1	RID16ind	27124
1592948	2332	56	AB1	RID16ind	33052
1606635	606	0	AB1	RID16ind	46739
1627849	371	2	AB1	RID16ind	67953
1628432	305	5	AB1	RID16ind	68536
1631867	831	28	AB1	RID16ind	71971
1637614	1270	38	AB1	RID16ind	77718
1637856	388	17	AB1	RID16ind	77960
1650163	767	38	AB1	RID16ind	90267
1652852	1506	15	AB1	RID16ind	92956
1654366	1461	31	AB1	RID16ind	94470
1657552	420	4	AB1	RID16ind	97656
1661233	622	22	AB1	RID16ind	101337
1665617	1584	26	AB1	RID16ind	105721
1666195	1383	36	AB1	RID16ind	106299
1677059	1183	17	AB1	RID16ind	117163
1683299	1041	24	AB1	RID21ind	3411
1684789	3871	126	AB1	RID21ind	4901
1689185	1934	18	AB1	RID21ind	9297
1693632	2506	28	AB1	RID21ind	13744
1695964	1793	21	AB1	RID21ind	16076
1696668	877	48	AB1	RID21ind	16780
1707012	681	21	AB1	RID21ind	27124
1712940	3820	28	AB1	RID21ind	33052
1726627	742	0	AB1	RID21ind	46739
1747841	448	1	AB1	RID21ind	67953
1748424	479	9	AB1	RID21ind	68536
1751859	1019	13	AB1	RID21ind	71971
1757606	1306	32	AB1	RID21ind	77718
1757848	413	5	AB1	RID21ind	77960
1770155	1050	12	AB1	RID21ind	90267
1772844	1266	42	AB1	RID21ind	92956
1774358	1869	40	AB1	RID21ind	94470
1777544	752	8	AB1	RID21ind	97656
1781225	698	3	AB1	RID21ind	101337
1785609	2135	14	AB1	RID21ind	105721
1786187	1767	21	AB1	RID21ind	106299
1797051	1354	17	AB1	RID21ind	117163
960256	278	0	AB4	R2D14ind	320
962266	3939	66	AB4	R2D14ind	2330
962347	795	0	AB4	R2D14ind	2411
963861	719	0	AB4	R2D14ind	3925
968907	412	0	AB4	R2D14ind	8971
971595	746	0	AB4	R2D14ind	11659
973381	571	0	AB4	R2D14ind	13445
974914	1257	0	AB4	R2D14ind	14978
977269	565	0	AB4	R2D14ind	17333
977368	635	0	AB4	R2D14ind	17432
981836	1109	0	AB4	R2D14ind	21900
984214	1293	0	AB4	R2D14ind	24278
984826	524	0	AB4	R2D14ind	24890
984935	3168	15	AB4	R2D14ind	24999
985198	1498	0	AB4	R2D14ind	25262
987396	449	0	AB4	R2D14ind	27460
987546	1177	0	AB4	R2D14ind	27610
988886	680	0	AB4	R2D14ind	28950
997931	1386	0	AB4	R2D14ind	37995
1050420	923	0	AB4	R2D14ind	90484
1053413	333	0	AB4	R2D14ind	93477
1057635	2337	0	AB4	R2D14ind	97699
1057676	1381	0	AB4	R2D14ind	97740
1059522	1852	0	AB4	R2D14ind	99586
1060948	747	0	AB4	R2D14ind	101012
1061337	556	0	AB4	R2D14ind	101401
1061375	1297	0	AB4	R2D14ind	101439
1061861	536	0	AB4	R2D14ind	101925
1062403	2003	0	AB4	R2D14ind	102467
1062937	1177	0	AB4	R2D14ind	103001
1063151	406	0	AB4	R2D14ind	103215
1063750	1230	0	AB4	R2D14ind	103814
1064989	1751	0	AB4	R2D14ind	105053
1067363	781	0	AB4	R2D14ind	107427
1068219	447	0	AB4	R2D14ind	108283
1069721	712	0	AB4	R2D14ind	109785
1072324	2276	0	AB4	R2D14ind	112388
1072723	871	0	AB4	R2D14ind	112787
1073067	5599	56	AB4	R2D14ind	113131
1073637	722	0	AB4	R2D14ind	113701
1075369	805	0	AB4	R2D14ind	115433
1078014	861	0	AB4	R2D14ind	118078
1078450	2215	0	AB4	R2D14ind	118514
1080248	88	0	AB4	R2D1ind	320
1082258	1208	26	AB4	R2D1ind	2330
1082339	172	0	AB4	R2D1ind	2411
1083853	146	0	AB4	R2D1ind	3925
1088899	109	0	AB4	R2D1ind	8971
1091587	195	0	AB4	R2D1ind	11659
1093373	139	0	AB4	R2D1ind	13445
1094906	328	0	AB4	R2D1ind	14978
1097261	187	0	AB4	R2D1ind	17333
1097360	237	0	AB4	R2D1ind	17432
1101828	262	0	AB4	R2D1ind	21900
1104206	342	0	AB4	R2D1ind	24278
1104818	189	0	AB4	R2D1ind	24890
1104927	1214	60	AB4	R2D1ind	24999
1105190	557	0	AB4	R2D1ind	25262
1107388	171	0	AB4	R2D1ind	27460
1107538	317	0	AB4	R2D1ind	27610
1108878	159	0	AB4	R2D1ind	28950
1117923	319	0	AB4	R2D1ind	37995
1170412	143	0	AB4	R2D1ind	90484
1173405	99	0	AB4	R2D1ind	93477
1177627	949	0	AB4	R2D1ind	97699
1177668	411	2	AB4	R2D1ind	97740
1179514	405	0	AB4	R2D1ind	99586
1180940	149	0	AB4	R2D1ind	101012
1181329	131	0	AB4	R2D1ind	101401
1181367	391	0	AB4	R2D1ind	101439
1181853	219	1	AB4	R2D1ind	101925
1182395	496	0	AB4	R2D1ind	102467
1182929	277	0	AB4	R2D1ind	103001
1183143	119	0	AB4	R2D1ind	103215
1183742	366	0	AB4	R2D1ind	103814
1184981	385	0	AB4	R2D1ind	105053
1187355	231	0	AB4	R2D1ind	107427
1188211	241	0	AB4	R2D1ind	108283
1189713	204	0	AB4	R2D1ind	109785
1192316	1083	0	AB4	R2D1ind	112388
1192715	220	0	AB4	R2D1ind	112787
1193059	1776	44	AB4	R2D1ind	113131
1193629	166	0	AB4	R2D1ind	113701
1195361	379	0	AB4	R2D1ind	115433
1198006	240	0	AB4	R2D1ind	118078
1198442	435	0	AB4	R2D1ind	118514
1200240	129	0	AB4	R2D21ind	320
1202250	1459	8	AB4	R2D21ind	2330
1202331	224	0	AB4	R2D21ind	2411
1203845	216	0	AB4	R2D21ind	3925
1208891	131	0	AB4	R2D21ind	8971
1211579	225	0	AB4	R2D21ind	11659
1213365	188	0	AB4	R2D21ind	13445
1214898	411	0	AB4	R2D21ind	14978
1217253	187	0	AB4	R2D21ind	17333
1217352	235	0	AB4	R2D21ind	17432
1221820	328	0	AB4	R2D21ind	21900
1224198	332	0	AB4	R2D21ind	24278
1224810	187	0	AB4	R2D21ind	24890
1224919	1135	0	AB4	R2D21ind	24999
1225182	568	0	AB4	R2D21ind	25262
1227380	212	0	AB4	R2D21ind	27460
1227530	316	0	AB4	R2D21ind	27610
1228870	173	0	AB4	R2D21ind	28950
1237915	354	0	AB4	R2D21ind	37995
1290404	212	0	AB4	R2D21ind	90484
1293397	108	0	AB4	R2D21ind	93477
1297619	1047	0	AB4	R2D21ind	97699
1297660	419	0	AB4	R2D21ind	97740
1299506	479	0	AB4	R2D21ind	99586
1300932	185	0	AB4	R2D21ind	101012
1301321	164	0	AB4	R2D21ind	101401
1301359	385	0	AB4	R2D21ind	101439
1301845	173	0	AB4	R2D21ind	101925
1302387	512	0	AB4	R2D21ind	102467
1302921	361	0	AB4	R2D21ind	103001
1303135	134	0	AB4	R2D21ind	103215
1303734	416	0	AB4	R2D21ind	103814
1304973	546	0	AB4	R2D21ind	105053
1307347	313	0	AB4	R2D21ind	107427
1308203	250	0	AB4	R2D21ind	108283
1309705	199	0	AB4	R2D21ind	109785
1312308	1295	0	AB4	R2D21ind	112388
1312707	223	0	AB4	R2D21ind	112787
1313051	1684	8	AB4	R2D21ind	113131
1313621	217	0	AB4	R2D21ind	113701
1315353	374	0	AB4	R2D21ind	115433
1317998	260	0	AB4	R2D21ind	118078
1318434	468	0	AB4	R2D21ind	118514
1320232	440	0	AB4	R2D24ind	320
1322242	5300	37	AB4	R2D24ind	2330
1322323	753	0	AB4	R2D24ind	2411
1323837	598	0	AB4	R2D24ind	3925
1328883	418	0	AB4	R2D24ind	8971
1331571	689	0	AB4	R2D24ind	11659
1333357	845	0	AB4	R2D24ind	13445
1334890	1589	0	AB4	R2D24ind	14978
1337245	633	0	AB4	R2D24ind	17333
1337344	1095	0	AB4	R2D24ind	17432
1341812	1291	0	AB4	R2D24ind	21900
1344190	1418	0	AB4	R2D24ind	24278
1344802	548	0	AB4	R2D24ind	24890
1344911	2991	0	AB4	R2D24ind	24999
1345174	1623	0	AB4	R2D24ind	25262
1347372	672	0	AB4	R2D24ind	27460
1347522	1476	0	AB4	R2D24ind	27610
1348862	971	0	AB4	R2D24ind	28950
1357907	1197	1	AB4	R2D24ind	37995
1410396	1067	2	AB4	R2D24ind	90484
1413389	637	0	AB4	R2D24ind	93477
1417611	2437	0	AB4	R2D24ind	97699
1417652	1424	0	AB4	R2D24ind	97740
1419498	1927	0	AB4	R2D24ind	99586
1420924	779	0	AB4	R2D24ind	101012
1421313	770	0	AB4	R2D24ind	101401
1421351	1490	0	AB4	R2D24ind	101439
1421837	578	0	AB4	R2D24ind	101925
1422379	1953	0	AB4	R2D24ind	102467
1422913	1457	0	AB4	R2D24ind	103001
1423127	619	0	AB4	R2D24ind	103215
1423726	1698	0	AB4	R2D24ind	103814
1424965	1889	0	AB4	R2D24ind	105053
1427339	1011	0	AB4	R2D24ind	107427
1428195	701	0	AB4	R2D24ind	108283
1429697	815	0	AB4	R2D24ind	109785
1432300	2905	0	AB4	R2D24ind	112388
1432699	953	0	AB4	R2D24ind	112787
1433043	5296	4	AB4	R2D24ind	113131
1433613	871	0	AB4	R2D24ind	113701
1435345	973	0	AB4	R2D24ind	115433
1437990	825	0	AB4	R2D24ind	118078
1438426	2421	0	AB4	R2D24ind	118514
1440224	396	0	AB4	R2D7ind	320
1442234	1158	12	AB4	R2D7ind	2330
1442315	977	0	AB4	R2D7ind	2411
1443829	1283	0	AB4	R2D7ind	3925
1448875	642	0	AB4	R2D7ind	8971
1451563	867	0	AB4	R2D7ind	11659
1453349	766	0	AB4	R2D7ind	13445
1454882	909	0	AB4	R2D7ind	14978
1457237	433	0	AB4	R2D7ind	17333
1457336	441	0	AB4	R2D7ind	17432
1461804	907	0	AB4	R2D7ind	21900
1464182	1751	0	AB4	R2D7ind	24278
1464794	509	0	AB4	R2D7ind	24890
1464903	4285	100	AB4	R2D7ind	24999
1465166	1719	0	AB4	R2D7ind	25262
1467364	407	0	AB4	R2D7ind	27460
1467514	3158	0	AB4	R2D7ind	27610
1468854	765	0	AB4	R2D7ind	28950
1477899	2271	0	AB4	R2D7ind	37995
1530388	1640	0	AB4	R2D7ind	90484
1533381	605	0	AB4	R2D7ind	93477
1537603	2823	0	AB4	R2D7ind	97699
1537644	1354	0	AB4	R2D7ind	97740
1539490	712	0	AB4	R2D7ind	99586
1540916	1535	0	AB4	R2D7ind	101012
1541305	655	0	AB4	R2D7ind	101401
1541343	1619	0	AB4	R2D7ind	101439
1541829	708	0	AB4	R2D7ind	101925
1542371	2386	0	AB4	R2D7ind	102467
1542905	1124	0	AB4	R2D7ind	103001
1543119	254	0	AB4	R2D7ind	103215
1543718	1292	0	AB4	R2D7ind	103814
1544957	1246	0	AB4	R2D7ind	105053
1547331	561	0	AB4	R2D7ind	107427
1548187	747	0	AB4	R2D7ind	108283
1549689	389	0	AB4	R2D7ind	109785
1552292	656	0	AB4	R2D7ind	112388
1552691	934	0	AB4	R2D7ind	112787
1553035	7156	116	AB4	R2D7ind	113131
1553605	1017	0	AB4	R2D7ind	113701
1555337	1078	0	AB4	R2D7ind	115433
1557982	896	0	AB4	R2D7ind	118078
1558418	2756	0	AB4	R2D7ind	118514
1560216	93	0	AB4	RID16ind	320
1562226	1033	17	AB4	RID16ind	2330
1562307	219	0	AB4	RID16ind	2411
1563821	155	0	AB4	RID16ind	3925
1568867	142	0	AB4	RID16ind	8971
1571555	264	0	AB4	RID16ind	11659
1573341	189	0	AB4	RID16ind	13445
1574874	393	0	AB4	RID16ind	14978
1577229	186	0	AB4	RID16ind	17333
1577328	216	0	AB4	RID16ind	17432
1581796	222	0	AB4	RID16ind	21900
1584174	365	0	AB4	RID16ind	24278
1584786	148	0	AB4	RID16ind	24890
1584895	1011	0	AB4	RID16ind	24999
1585158	348	0	AB4	RID16ind	25262
1587356	138	0	AB4	RID16ind	27460
1587506	306	0	AB4	RID16ind	27610
1588846	179	0	AB4	RID16ind	28950
1597891	441	0	AB4	RID16ind	37995
1650380	236	0	AB4	RID16ind	90484
1653373	154	0	AB4	RID16ind	93477
1657595	1026	0	AB4	RID16ind	97699
1657636	468	0	AB4	RID16ind	97740
1659482	820	0	AB4	RID16ind	99586
1660908	237	0	AB4	RID16ind	101012
1661297	189	0	AB4	RID16ind	101401
1661335	392	0	AB4	RID16ind	101439
1661821	203	0	AB4	RID16ind	101925
1662363	799	0	AB4	RID16ind	102467
1662897	435	0	AB4	RID16ind	103001
1663111	190	0	AB4	RID16ind	103215
1663710	290	0	AB4	RID16ind	103814
1664949	686	0	AB4	RID16ind	105053
1667323	241	0	AB4	RID16ind	107427
1668179	152	0	AB4	RID16ind	108283
1669681	241	0	AB4	RID16ind	109785
1672284	1110	0	AB4	RID16ind	112388
1672683	299	0	AB4	RID16ind	112787
1673027	2131	40	AB4	RID16ind	113131
1673597	277	0	AB4	RID16ind	113701
1675329	332	0	AB4	RID16ind	115433
1677974	259	0	AB4	RID16ind	118078
1678410	811	0	AB4	RID16ind	118514
1680208	111	0	AB4	RID21ind	320
1682218	1637	9	AB4	RID21ind	2330
1682299	425	0	AB4	RID21ind	2411
1683813	259	0	AB4	RID21ind	3925
1688859	129	0	AB4	RID21ind	8971
1691547	205	0	AB4	RID21ind	11659
1693333	261	0	AB4	RID21ind	13445
1694866	514	0	AB4	RID21ind	14978
1697221	175	0	AB4	RID21ind	17333
1697320	313	0	AB4	RID21ind	17432
1701788	492	0	AB4	RID21ind	21900
1704166	455	0	AB4	RID21ind	24278
1704778	165	0	AB4	RID21ind	24890
1704887	1255	35	AB4	RID21ind	24999
1705150	570	0	AB4	RID21ind	25262
1707348	252	0	AB4	RID21ind	27460
1707498	462	0	AB4	RID21ind	27610
1708838	254	0	AB4	RID21ind	28950
1717883	484	0	AB4	RID21ind	37995
1770372	317	0	AB4	RID21ind	90484
1773365	173	0	AB4	RID21ind	93477
1777587	1024	0	AB4	RID21ind	97699
1777628	538	0	AB4	RID21ind	97740
1779474	851	0	AB4	RID21ind	99586
1780900	368	0	AB4	RID21ind	101012
1781289	288	0	AB4	RID21ind	101401
1781327	567	0	AB4	RID21ind	101439
1781813	241	0	AB4	RID21ind	101925
1782355	893	0	AB4	RID21ind	102467
1782889	589	0	AB4	RID21ind	103001
1783103	218	0	AB4	RID21ind	103215
1783702	512	0	AB4	RID21ind	103814
1784941	819	0	AB4	RID21ind	105053
1787315	304	0	AB4	RID21ind	107427
1788171	249	0	AB4	RID21ind	108283
1789673	255	0	AB4	RID21ind	109785
1792276	931	0	AB4	RID21ind	112388
1792675	350	0	AB4	RID21ind	112787
1793019	2156	0	AB4	RID21ind	113131
1793589	405	0	AB4	RID21ind	113701
1795321	351	0	AB4	RID21ind	115433
1797966	350	0	AB4	RID21ind	118078
1798402	969	0	AB4	RID21ind	118514
961960	6769	0	CB4851	R2D14ind	2024
961975	316	0	CB4851	R2D14ind	2039
973423	3570	6	CB4851	R2D14ind	13487
976495	6766	0	CB4851	R2D14ind	16559
977628	3102	3	CB4851	R2D14ind	17692
979132	2571	0	CB4851	R2D14ind	19196
984539	8517	0	CB4851	R2D14ind	24603
988694	1942	0	CB4851	R2D14ind	28758
1004396	1112	0	CB4851	R2D14ind	44460
1007178	2084	0	CB4851	R2D14ind	47242
1016652	8316	4	CB4851	R2D14ind	56716
1031029	3039	1	CB4851	R2D14ind	71093
1039497	357	0	CB4851	R2D14ind	79561
1044219	1193	0	CB4851	R2D14ind	84283
1049969	645	1	CB4851	R2D14ind	90033
1055587	1361	0	CB4851	R2D14ind	95651
1059055	553	5	CB4851	R2D14ind	99119
1060207	1035	0	CB4851	R2D14ind	100271
1067256	2880	2	CB4851	R2D14ind	107320
1067748	640	0	CB4851	R2D14ind	107812
1074805	900	0	CB4851	R2D14ind	114869
1079124	3715	0	CB4851	R2D14ind	119188
1081952	1335	0	CB4851	R2D1ind	2024
1081967	151	0	CB4851	R2D1ind	2039
1093415	1339	3	CB4851	R2D1ind	13487
1096487	1605	0	CB4851	R2D1ind	16559
1097620	496	0	CB4851	R2D1ind	17692
1099124	792	0	CB4851	R2D1ind	19196
1104531	2604	0	CB4851	R2D1ind	24603
1108686	488	0	CB4851	R2D1ind	28758
1124388	308	0	CB4851	R2D1ind	44460
1127170	672	0	CB4851	R2D1ind	47242
1136644	1482	0	CB4851	R2D1ind	56716
1151021	586	0	CB4851	R2D1ind	71093
1159489	164	0	CB4851	R2D1ind	79561
1164211	240	0	CB4851	R2D1ind	84283
1169961	296	0	CB4851	R2D1ind	90033
1175579	291	0	CB4851	R2D1ind	95651
1179047	246	0	CB4851	R2D1ind	99119
1180199	386	0	CB4851	R2D1ind	100271
1187248	781	0	CB4851	R2D1ind	107320
1187740	380	0	CB4851	R2D1ind	107812
1194797	265	0	CB4851	R2D1ind	114869
1199116	1482	0	CB4851	R2D1ind	119188
1201944	1492	0	CB4851	R2D21ind	2024
1201959	189	0	CB4851	R2D21ind	2039
1213407	1191	0	CB4851	R2D21ind	13487
1216479	1755	0	CB4851	R2D21ind	16559
1217612	574	0	CB4851	R2D21ind	17692
1219116	692	0	CB4851	R2D21ind	19196
1224523	2171	0	CB4851	R2D21ind	24603
1228678	559	0	CB4851	R2D21ind	28758
1244380	309	0	CB4851	R2D21ind	44460
1247162	605	0	CB4851	R2D21ind	47242
1256636	1451	2	CB4851	R2D21ind	56716
1271013	668	0	CB4851	R2D21ind	71093
1279481	164	1	CB4851	R2D21ind	79561
1284203	284	0	CB4851	R2D21ind	84283
1289953	263	0	CB4851	R2D21ind	90033
1295571	335	0	CB4851	R2D21ind	95651
1299039	214	0	CB4851	R2D21ind	99119
1300191	462	0	CB4851	R2D21ind	100271
1307240	787	1	CB4851	R2D21ind	107320
1307732	408	0	CB4851	R2D21ind	107812
1314789	237	0	CB4851	R2D21ind	114869
1319108	2234	0	CB4851	R2D21ind	119188
1321936	6901	3	CB4851	R2D24ind	2024
1321951	292	0	CB4851	R2D24ind	2039
1333399	3821	0	CB4851	R2D24ind	13487
1336471	6796	0	CB4851	R2D24ind	16559
1337604	2715	3	CB4851	R2D24ind	17692
1339108	2665	2	CB4851	R2D24ind	19196
1344515	7019	0	CB4851	R2D24ind	24603
1348670	1890	0	CB4851	R2D24ind	28758
1364372	1121	0	CB4851	R2D24ind	44460
1367154	2298	0	CB4851	R2D24ind	47242
1376628	6835	4	CB4851	R2D24ind	56716
1391005	3667	0	CB4851	R2D24ind	71093
1399473	486	0	CB4851	R2D24ind	79561
1404195	955	1	CB4851	R2D24ind	84283
1409945	575	1	CB4851	R2D24ind	90033
1415563	1844	0	CB4851	R2D24ind	95651
1419031	861	5	CB4851	R2D24ind	99119
1420183	1175	0	CB4851	R2D24ind	100271
1427232	2703	3	CB4851	R2D24ind	107320
1427724	920	0	CB4851	R2D24ind	107812
1434781	1053	0	CB4851	R2D24ind	114869
1439100	3507	0	CB4851	R2D24ind	119188
1441928	7057	3	CB4851	R2D7ind	2024
1441943	537	0	CB4851	R2D7ind	2039
1453391	4950	0	CB4851	R2D7ind	13487
1456463	7695	0	CB4851	R2D7ind	16559
1457596	3017	2	CB4851	R2D7ind	17692
1459100	3199	0	CB4851	R2D7ind	19196
1464507	10986	4	CB4851	R2D7ind	24603
1468662	1944	0	CB4851	R2D7ind	28758
1484364	1391	0	CB4851	R2D7ind	44460
1487146	2374	0	CB4851	R2D7ind	47242
1496620	8356	2	CB4851	R2D7ind	56716
1510997	2825	0	CB4851	R2D7ind	71093
1519465	382	0	CB4851	R2D7ind	79561
1524187	1646	1	CB4851	R2D7ind	84283
1529937	747	1	CB4851	R2D7ind	90033
1535555	1261	0	CB4851	R2D7ind	95651
1539023	820	4	CB4851	R2D7ind	99119
1540175	1302	0	CB4851	R2D7ind	100271
1547224	3845	2	CB4851	R2D7ind	107320
1547716	994	0	CB4851	R2D7ind	107812
1554773	1189	0	CB4851	R2D7ind	114869
1559092	4791	3	CB4851	R2D7ind	119188
1561920	2902	0	CB4851	RID16ind	2024
1561935	107	0	CB4851	RID16ind	2039
1573383	1266	0	CB4851	RID16ind	13487
1576455	2930	0	CB4851	RID16ind	16559
1577588	1082	2	CB4851	RID16ind	17692
1579092	1036	0	CB4851	RID16ind	19196
1584499	2804	0	CB4851	RID16ind	24603
1588654	916	0	CB4851	RID16ind	28758
1604356	368	0	CB4851	RID16ind	44460
1607138	898	0	CB4851	RID16ind	47242
1616612	3402	0	CB4851	RID16ind	56716
1630989	811	0	CB4851	RID16ind	71093
1639457	112	0	CB4851	RID16ind	79561
1644179	266	0	CB4851	RID16ind	84283
1649929	238	0	CB4851	RID16ind	90033
1655547	511	0	CB4851	RID16ind	95651
1659015	166	1	CB4851	RID16ind	99119
1660167	262	0	CB4851	RID16ind	100271
1667216	1054	0	CB4851	RID16ind	107320
1667708	252	0	CB4851	RID16ind	107812
1674765	329	0	CB4851	RID16ind	114869
1679084	1809	3	CB4851	RID16ind	119188
1681912	3464	0	CB4851	RID21ind	2024
1681927	139	1	CB4851	RID21ind	2039
1693375	1695	0	CB4851	RID21ind	13487
1696447	3569	0	CB4851	RID21ind	16559
1697580	1229	0	CB4851	RID21ind	17692
1699084	1220	0	CB4851	RID21ind	19196
1704491	3385	0	CB4851	RID21ind	24603
1708646	958	0	CB4851	RID21ind	28758
1724348	466	0	CB4851	RID21ind	44460
1727130	972	0	CB4851	RID21ind	47242
1736604	3636	0	CB4851	RID21ind	56716
1750981	1087	0	CB4851	RID21ind	71093
1759449	223	0	CB4851	RID21ind	79561
1764171	294	0	CB4851	RID21ind	84283
1769921	321	1	CB4851	RID21ind	90033
1775539	529	0	CB4851	RID21ind	95651
1779007	257	1	CB4851	RID21ind	99119
1780159	295	0	CB4851	RID21ind	100271
1787208	1285	1	CB4851	RID21ind	107320
1787700	208	0	CB4851	RID21ind	107812
1794757	366	0	CB4851	RID21ind	114869
1799076	1824	0	CB4851	RID21ind	119188
964426	2020	2	CB4852	R2D14ind	4490
971767	1688	0	CB4852	R2D14ind	11831
971771	1884	20	CB4852	R2D14ind	11835
972984	7054	9	CB4852	R2D14ind	13048
973241	2965	0	CB4852	R2D14ind	13305
974040	2	0	CB4852	R2D14ind	14104
974108	964	2	CB4852	R2D14ind	14172
993703	3722	2	CB4852	R2D14ind	33767
1022867	786	0	CB4852	R2D14ind	62931
1023336	1957	2	CB4852	R2D14ind	63400
1035540	2343	1	CB4852	R2D14ind	75604
1046679	1760	3	CB4852	R2D14ind	86743
1056950	3369	6	CB4852	R2D14ind	97014
1061647	1761	2	CB4852	R2D14ind	101711
1071219	3516	6	CB4852	R2D14ind	111283
1074950	1801	1	CB4852	R2D14ind	115014
1084418	391	9	CB4852	R2D1ind	4490
1091759	378	0	CB4852	R2D1ind	11831
1091763	479	13	CB4852	R2D1ind	11835
1092976	1904	16	CB4852	R2D1ind	13048
1093233	924	0	CB4852	R2D1ind	13305
1094032	632	2	CB4852	R2D1ind	14104
1094100	892	8	CB4852	R2D1ind	14172
1113695	1012	10	CB4852	R2D1ind	33767
1142859	235	4	CB4852	R2D1ind	62931
1143328	780	18	CB4852	R2D1ind	63400
1155532	563	0	CB4852	R2D1ind	75604
1166671	523	0	CB4852	R2D1ind	86743
1176942	1118	4	CB4852	R2D1ind	97014
1181639	340	3	CB4852	R2D1ind	101711
1191211	1188	21	CB4852	R2D1ind	111283
1194942	323	5	CB4852	R2D1ind	115014
1204410	434	0	CB4852	R2D21ind	4490
1211751	433	0	CB4852	R2D21ind	11831
1211755	465	1	CB4852	R2D21ind	11835
1212968	1687	4	CB4852	R2D21ind	13048
1213225	892	1	CB4852	R2D21ind	13305
1214024	712	0	CB4852	R2D21ind	14104
1214092	884	0	CB4852	R2D21ind	14172
1233687	926	2	CB4852	R2D21ind	33767
1262851	268	0	CB4852	R2D21ind	62931
1263320	859	0	CB4852	R2D21ind	63400
1275524	593	0	CB4852	R2D21ind	75604
1286663	565	0	CB4852	R2D21ind	86743
1296934	882	0	CB4852	R2D21ind	97014
1301631	409	1	CB4852	R2D21ind	101711
1311203	1492	3	CB4852	R2D21ind	111283
1314934	462	1	CB4852	R2D21ind	115014
1324402	2047	1	CB4852	R2D24ind	4490
1331743	1476	0	CB4852	R2D24ind	11831
1331747	1954	1	CB4852	R2D24ind	11835
1332960	5825	9	CB4852	R2D24ind	13048
1333217	3135	0	CB4852	R2D24ind	13305
1334016	16	0	CB4852	R2D24ind	14104
1334084	718	0	CB4852	R2D24ind	14172
1353679	3220	0	CB4852	R2D24ind	33767
1382843	975	0	CB4852	R2D24ind	62931
1383312	2247	0	CB4852	R2D24ind	63400
1395516	2585	1	CB4852	R2D24ind	75604
1406655	2496	0	CB4852	R2D24ind	86743
1416926	3498	0	CB4852	R2D24ind	97014
1421623	1730	0	CB4852	R2D24ind	101711
1431195	4123	0	CB4852	R2D24ind	111283
1434926	1708	6	CB4852	R2D24ind	115014
1444394	2382	28	CB4852	R2D7ind	4490
1451735	2267	0	CB4852	R2D7ind	11831
1451739	2541	22	CB4852	R2D7ind	11835
1452952	8868	33	CB4852	R2D7ind	13048
1453209	3228	0	CB4852	R2D7ind	13305
1454008	2	0	CB4852	R2D7ind	14104
1454076	1460	0	CB4852	R2D7ind	14172
1473671	4030	4	CB4852	R2D7ind	33767
1502835	1418	13	CB4852	R2D7ind	62931
1503304	3267	12	CB4852	R2D7ind	63400
1515508	1851	0	CB4852	R2D7ind	75604
1526647	2796	0	CB4852	R2D7ind	86743
1536918	4350	24	CB4852	R2D7ind	97014
1541615	1998	12	CB4852	R2D7ind	101711
1551187	2946	6	CB4852	R2D7ind	111283
1554918	1999	15	CB4852	R2D7ind	115014
1564386	608	3	CB4852	RID16ind	4490
1571727	407	0	CB4852	RID16ind	11831
1571731	665	0	CB4852	RID16ind	11835
1572944	2900	0	CB4852	RID16ind	13048
1573201	643	0	CB4852	RID16ind	13305
1574000	0	0	CB4852	RID16ind	14104
1574068	400	0	CB4852	RID16ind	14172
1593663	1234	0	CB4852	RID16ind	33767
1622827	216	1	CB4852	RID16ind	62931
1623296	1016	0	CB4852	RID16ind	63400
1635500	1022	1	CB4852	RID16ind	75604
1646639	492	0	CB4852	RID16ind	86743
1656910	1035	0	CB4852	RID16ind	97014
1661607	1024	0	CB4852	RID16ind	101711
1671179	1888	0	CB4852	RID16ind	111283
1674910	677	0	CB4852	RID16ind	115014
1684378	1010	5	CB4852	RID21ind	4490
1691719	617	0	CB4852	RID21ind	11831
1691723	776	0	CB4852	RID21ind	11835
1692936	2832	3	CB4852	RID21ind	13048
1693193	1027	0	CB4852	RID21ind	13305
1693992	2	0	CB4852	RID21ind	14104
1694060	288	0	CB4852	RID21ind	14172
1713655	1608	0	CB4852	RID21ind	33767
1742819	256	0	CB4852	RID21ind	62931
1743288	1161	6	CB4852	RID21ind	63400
1755492	1321	0	CB4852	RID21ind	75604
1766631	597	0	CB4852	RID21ind	86743
1776902	1374	0	CB4852	RID21ind	97014
1781599	966	0	CB4852	RID21ind	101711
1791171	1948	0	CB4852	RID21ind	111283
1794902	808	0	CB4852	RID21ind	115014
960114	1067	0	CB4853	R2D14ind	178
970698	1777	0	CB4853	R2D14ind	10762
977394	2041	0	CB4853	R2D14ind	17458
986062	1775	0	CB4853	R2D14ind	26126
986121	363	0	CB4853	R2D14ind	26185
987763	1313	0	CB4853	R2D14ind	27827
988058	4528	0	CB4853	R2D14ind	28122
988704	6434	6	CB4853	R2D14ind	28768
1025628	1929	21	CB4853	R2D14ind	65692
1030558	2440	0	CB4853	R2D14ind	70622
1031723	825	0	CB4853	R2D14ind	71787
1050073	2341	2	CB4853	R2D14ind	90137
1050246	1850	0	CB4853	R2D14ind	90310
1055927	2200	16	CB4853	R2D14ind	95991
1057281	1215	0	CB4853	R2D14ind	97345
1058495	2699	2	CB4853	R2D14ind	98559
1060570	1458	0	CB4853	R2D14ind	100634
1063173	873	5	CB4853	R2D14ind	103237
1068140	1808	1	CB4853	R2D14ind	108204
1068166	5457	0	CB4853	R2D14ind	108230
1076655	5383	6	CB4853	R2D14ind	116719
1077013	1149	0	CB4853	R2D14ind	117077
1080106	397	0	CB4853	R2D1ind	178
1090690	410	0	CB4853	R2D1ind	10762
1097386	731	0	CB4853	R2D1ind	17458
1106054	752	0	CB4853	R2D1ind	26126
1106113	190	0	CB4853	R2D1ind	26185
1107755	541	0	CB4853	R2D1ind	27827
1108050	1076	0	CB4853	R2D1ind	28122
1108696	1619	6	CB4853	R2D1ind	28768
1145620	457	7	CB4853	R2D1ind	65692
1150550	524	4	CB4853	R2D1ind	70622
1151715	216	1	CB4853	R2D1ind	71787
1170065	550	0	CB4853	R2D1ind	90137
1170238	534	0	CB4853	R2D1ind	90310
1175919	572	2	CB4853	R2D1ind	95991
1177273	476	0	CB4853	R2D1ind	97345
1178487	888	0	CB4853	R2D1ind	98559
1180562	401	0	CB4853	R2D1ind	100634
1183165	263	0	CB4853	R2D1ind	103237
1188132	496	0	CB4853	R2D1ind	108204
1188158	1662	6	CB4853	R2D1ind	108230
1196647	1391	0	CB4853	R2D1ind	116719
1197005	328	0	CB4853	R2D1ind	117077
1200098	402	0	CB4853	R2D21ind	178
1210682	508	0	CB4853	R2D21ind	10762
1217378	895	0	CB4853	R2D21ind	17458
1226046	669	0	CB4853	R2D21ind	26126
1226105	222	0	CB4853	R2D21ind	26185
1227747	532	0	CB4853	R2D21ind	27827
1228042	1024	0	CB4853	R2D21ind	28122
1228688	1629	0	CB4853	R2D21ind	28768
1265612	540	9	CB4853	R2D21ind	65692
1270542	620	0	CB4853	R2D21ind	70622
1271707	287	0	CB4853	R2D21ind	71787
1290057	621	0	CB4853	R2D21ind	90137
1290230	639	0	CB4853	R2D21ind	90310
1295911	544	8	CB4853	R2D21ind	95991
1297265	474	0	CB4853	R2D21ind	97345
1298479	750	0	CB4853	R2D21ind	98559
1300554	610	0	CB4853	R2D21ind	100634
1303157	246	0	CB4853	R2D21ind	103237
1308124	690	0	CB4853	R2D21ind	108204
1308150	1668	0	CB4853	R2D21ind	108230
1316639	1541	6	CB4853	R2D21ind	116719
1316997	325	0	CB4853	R2D21ind	117077
1320090	1181	1	CB4853	R2D24ind	178
1330674	2070	0	CB4853	R2D24ind	10762
1337370	2464	0	CB4853	R2D24ind	17458
1346038	2158	0	CB4853	R2D24ind	26126
1346097	381	0	CB4853	R2D24ind	26185
1347739	1395	0	CB4853	R2D24ind	27827
1348034	4601	0	CB4853	R2D24ind	28122
1348680	7430	3	CB4853	R2D24ind	28768
1385604	1942	0	CB4853	R2D24ind	65692
1390534	2684	0	CB4853	R2D24ind	70622
1391699	1003	0	CB4853	R2D24ind	71787
1410049	2324	4	CB4853	R2D24ind	90137
1410222	2028	0	CB4853	R2D24ind	90310
1415903	1972	0	CB4853	R2D24ind	95991
1417257	1404	0	CB4853	R2D24ind	97345
1418471	3537	0	CB4853	R2D24ind	98559
1420546	2140	0	CB4853	R2D24ind	100634
1423149	937	0	CB4853	R2D24ind	103237
1428116	2100	0	CB4853	R2D24ind	108204
1428142	5951	0	CB4853	R2D24ind	108230
1436631	4827	0	CB4853	R2D24ind	116719
1436989	910	1	CB4853	R2D24ind	117077
1440082	528	0	CB4853	R2D7ind	178
1450666	1523	0	CB4853	R2D7ind	10762
1457362	3063	0	CB4853	R2D7ind	17458
1466030	1784	0	CB4853	R2D7ind	26126
1466089	826	0	CB4853	R2D7ind	26185
1467731	2050	0	CB4853	R2D7ind	27827
1468026	5128	0	CB4853	R2D7ind	28122
1468672	4596	6	CB4853	R2D7ind	28768
1505596	2390	19	CB4853	R2D7ind	65692
1510526	2720	16	CB4853	R2D7ind	70622
1511691	804	0	CB4853	R2D7ind	71787
1530041	3034	1	CB4853	R2D7ind	90137
1530214	2908	0	CB4853	R2D7ind	90310
1535895	2060	8	CB4853	R2D7ind	95991
1537249	1829	0	CB4853	R2D7ind	97345
1538463	4490	3	CB4853	R2D7ind	98559
1540538	799	0	CB4853	R2D7ind	100634
1543141	1183	2	CB4853	R2D7ind	103237
1548108	1508	0	CB4853	R2D7ind	108204
1548134	7366	0	CB4853	R2D7ind	108230
1556623	2659	3	CB4853	R2D7ind	116719
1556981	1806	0	CB4853	R2D7ind	117077
1560074	374	0	CB4853	RID16ind	178
1570658	863	0	CB4853	RID16ind	10762
1577354	949	0	CB4853	RID16ind	17458
1586022	712	0	CB4853	RID16ind	26126
1586081	139	0	CB4853	RID16ind	26185
1587723	692	0	CB4853	RID16ind	27827
1588018	1952	0	CB4853	RID16ind	28122
1588664	2073	0	CB4853	RID16ind	28768
1625588	918	7	CB4853	RID16ind	65692
1630518	794	0	CB4853	RID16ind	70622
1631683	379	0	CB4853	RID16ind	71787
1650033	980	1	CB4853	RID16ind	90137
1650206	672	0	CB4853	RID16ind	90310
1655887	688	4	CB4853	RID16ind	95991
1657241	344	0	CB4853	RID16ind	97345
1658455	885	0	CB4853	RID16ind	98559
1660530	552	4	CB4853	RID16ind	100634
1663133	265	0	CB4853	RID16ind	103237
1668100	623	0	CB4853	RID16ind	108204
1668126	2457	0	CB4853	RID16ind	108230
1676615	1988	6	CB4853	RID16ind	116719
1676973	403	0	CB4853	RID16ind	117077
1680066	509	0	CB4853	RID21ind	178
1690650	919	0	CB4853	RID21ind	10762
1697346	1035	0	CB4853	RID21ind	17458
1706014	909	0	CB4853	RID21ind	26126
1706073	159	0	CB4853	RID21ind	26185
1707715	779	0	CB4853	RID21ind	27827
1708010	2220	0	CB4853	RID21ind	28122
1708656	3152	0	CB4853	RID21ind	28768
1745580	1062	0	CB4853	RID21ind	65692
1750510	1114	0	CB4853	RID21ind	70622
1751675	442	1	CB4853	RID21ind	71787
1770025	1237	0	CB4853	RID21ind	90137
1770198	873	0	CB4853	RID21ind	90310
1775879	864	2	CB4853	RID21ind	95991
1777233	482	0	CB4853	RID21ind	97345
1778447	894	3	CB4853	RID21ind	98559
1780522	600	0	CB4853	RID21ind	100634
1783125	437	0	CB4853	RID21ind	103237
1788092	800	0	CB4853	RID21ind	108204
1788118	2647	0	CB4853	RID21ind	108230
1796607	2484	0	CB4853	RID21ind	116719
1796965	504	0	CB4853	RID21ind	117077
960933	2128	65	CB4854	R2D14ind	997
961148	2204	50	CB4854	R2D14ind	1212
961173	1446	22	CB4854	R2D14ind	1237
961196	796	12	CB4854	R2D14ind	1260
961498	1380	36	CB4854	R2D14ind	1562
961953	7344	88	CB4854	R2D14ind	2017
963615	1270	8	CB4854	R2D14ind	3679
965095	3014	55	CB4854	R2D14ind	5159
965199	1652	12	CB4854	R2D14ind	5263
965301	1817	50	CB4854	R2D14ind	5365
965561	3418	60	CB4854	R2D14ind	5625
965607	7247	68	CB4854	R2D14ind	5671
965661	1945	39	CB4854	R2D14ind	5725
965732	923	1	CB4854	R2D14ind	5796
965803	5460	104	CB4854	R2D14ind	5867
969019	8724	227	CB4854	R2D14ind	9083
969099	0	0	CB4854	R2D14ind	9163
969260	4250	122	CB4854	R2D14ind	9324
969952	1207	26	CB4854	R2D14ind	10016
970204	765	4	CB4854	R2D14ind	10268
970340	7339	27	CB4854	R2D14ind	10404
970349	764	10	CB4854	R2D14ind	10413
970720	4065	141	CB4854	R2D14ind	10784
970823	2224	14	CB4854	R2D14ind	10887
971163	2946	32	CB4854	R2D14ind	11227
971167	2487	51	CB4854	R2D14ind	11231
971214	704	11	CB4854	R2D14ind	11278
971645	1699	22	CB4854	R2D14ind	11709
971682	1561	8	CB4854	R2D14ind	11746
971809	768	37	CB4854	R2D14ind	11873
971853	1631	40	CB4854	R2D14ind	11917
971877	1501	18	CB4854	R2D14ind	11941
971888	6969	174	CB4854	R2D14ind	11952
971926	6708	126	CB4854	R2D14ind	11990
971929	5286	84	CB4854	R2D14ind	11993
971986	1140	44	CB4854	R2D14ind	12050
972390	3230	103	CB4854	R2D14ind	12454
972417	550	4	CB4854	R2D14ind	12481
972515	4967	50	CB4854	R2D14ind	12579
972549	1311	4	CB4854	R2D14ind	12613
972642	1793	39	CB4854	R2D14ind	12706
972741	822	9	CB4854	R2D14ind	12805
972757	20495	506	CB4854	R2D14ind	12821
972771	2037	66	CB4854	R2D14ind	12835
972813	932	39	CB4854	R2D14ind	12877
983354	1659	40	CB4854	R2D14ind	23418
986274	1751	68	CB4854	R2D14ind	26338
986911	0	0	CB4854	R2D14ind	26975
986920	508	7	CB4854	R2D14ind	26984
987022	3143	42	CB4854	R2D14ind	27086
991495	1390	35	CB4854	R2D14ind	31559
991510	2708	102	CB4854	R2D14ind	31574
991556	42	1	CB4854	R2D14ind	31620
991911	3846	72	CB4854	R2D14ind	31975
995069	2896	22	CB4854	R2D14ind	35133
995274	1751	56	CB4854	R2D14ind	35338
995285	9809	160	CB4854	R2D14ind	35349
995561	1940	26	CB4854	R2D14ind	35625
995608	6358	48	CB4854	R2D14ind	35672
995623	5818	122	CB4854	R2D14ind	35687
995653	3242	85	CB4854	R2D14ind	35717
995665	1814	28	CB4854	R2D14ind	35729
995709	665	14	CB4854	R2D14ind	35773
999074	2019	24	CB4854	R2D14ind	39138
999257	4194	122	CB4854	R2D14ind	39321
1000310	3312	46	CB4854	R2D14ind	40374
1000407	777	17	CB4854	R2D14ind	40471
1001162	2982	32	CB4854	R2D14ind	41226
1001163	2495	54	CB4854	R2D14ind	41227
1001170	2041	64	CB4854	R2D14ind	41234
1001409	1014	6	CB4854	R2D14ind	41473
1001879	3027	34	CB4854	R2D14ind	41943
1001998	1641	110	CB4854	R2D14ind	42062
1002015	893	27	CB4854	R2D14ind	42079
1002028	703	14	CB4854	R2D14ind	42092
1002200	4055	79	CB4854	R2D14ind	42264
1002496	497	0	CB4854	R2D14ind	42560
1002529	521	5	CB4854	R2D14ind	42593
1002537	7194	24	CB4854	R2D14ind	42601
1002553	1420	27	CB4854	R2D14ind	42617
1002557	888	16	CB4854	R2D14ind	42621
1002757	20503	440	CB4854	R2D14ind	42821
1006625	714	10	CB4854	R2D14ind	46689
1006629	1751	24	CB4854	R2D14ind	46693
1016207	1367	24	CB4854	R2D14ind	56271
1016366	1151	24	CB4854	R2D14ind	56430
1016764	2317	46	CB4854	R2D14ind	56828
1017003	2220	22	CB4854	R2D14ind	57067
1017022	3151	33	CB4854	R2D14ind	57086
1021145	2206	50	CB4854	R2D14ind	61209
1021193	796	10	CB4854	R2D14ind	61257
1021581	3491	78	CB4854	R2D14ind	61645
1021603	2972	48	CB4854	R2D14ind	61667
1021900	3421	20	CB4854	R2D14ind	61964
1025073	1087	53	CB4854	R2D14ind	65137
1025384	1485	81	CB4854	R2D14ind	65448
1025566	2235	36	CB4854	R2D14ind	65630
1025570	2364	92	CB4854	R2D14ind	65634
1025605	6289	0	CB4854	R2D14ind	65669
1025655	1923	39	CB4854	R2D14ind	65719
1025700	3268	84	CB4854	R2D14ind	65764
1025826	2338	23	CB4854	R2D14ind	65890
1025868	314	3	CB4854	R2D14ind	65932
1029367	909	12	CB4854	R2D14ind	69431
1029846	9719	63	CB4854	R2D14ind	69910
1029861	2616	117	CB4854	R2D14ind	69925
1030057	5756	105	CB4854	R2D14ind	70121
1030916	4074	98	CB4854	R2D14ind	70980
1030931	1132	2	CB4854	R2D14ind	70995
1031355	2834	43	CB4854	R2D14ind	71419
1031536	804	9	CB4854	R2D14ind	71600
1031669	1648	23	CB4854	R2D14ind	71733
1032028	844	2	CB4854	R2D14ind	72092
1032056	1870	20	CB4854	R2D14ind	72120
1032439	4988	70	CB4854	R2D14ind	72503
1032446	1378	22	CB4854	R2D14ind	72510
1032779	3400	70	CB4854	R2D14ind	72843
1036604	8030	165	CB4854	R2D14ind	76668
1046092	5399	118	CB4854	R2D14ind	86156
1046209	767	33	CB4854	R2D14ind	86273
1046265	1803	60	CB4854	R2D14ind	86329
1051504	2177	105	CB4854	R2D14ind	91568
1051782	718	36	CB4854	R2D14ind	91846
1051793	1376	21	CB4854	R2D14ind	91857
1051860	1709	28	CB4854	R2D14ind	91924
1055199	683	26	CB4854	R2D14ind	95263
1055226	9124	237	CB4854	R2D14ind	95290
1055240	666	14	CB4854	R2D14ind	95304
1055495	716	24	CB4854	R2D14ind	95559
1055561	682	11	CB4854	R2D14ind	95625
1055566	2340	92	CB4854	R2D14ind	95630
1055572	3728	92	CB4854	R2D14ind	95636
1055696	3283	84	CB4854	R2D14ind	95760
1055810	1430	14	CB4854	R2D14ind	95874
1055888	600	15	CB4854	R2D14ind	95952
1055920	1173	10	CB4854	R2D14ind	95984
1058874	1733	77	CB4854	R2D14ind	98938
1058908	1509	51	CB4854	R2D14ind	98972
1059359	2094	25	CB4854	R2D14ind	99423
1059399	4569	102	CB4854	R2D14ind	99463
1059554	1219	15	CB4854	R2D14ind	99618
1059845	9608	63	CB4854	R2D14ind	99909
1059849	9503	63	CB4854	R2D14ind	99913
1060269	662	4	CB4854	R2D14ind	100333
1060346	1338	0	CB4854	R2D14ind	100410
1060347	1338	4	CB4854	R2D14ind	100411
1060366	540	0	CB4854	R2D14ind	100430
1061160	2493	57	CB4854	R2D14ind	101224
1061162	3520	12	CB4854	R2D14ind	101226
1061163	3532	4	CB4854	R2D14ind	101227
1061164	3532	4	CB4854	R2D14ind	101228
1061711	1434	14	CB4854	R2D14ind	101775
1061946	3971	54	CB4854	R2D14ind	102010
1062030	1218	26	CB4854	R2D14ind	102094
1062037	334	16	CB4854	R2D14ind	102101
1062062	1014	48	CB4854	R2D14ind	102126
1062379	1056	6	CB4854	R2D14ind	102443
1062452	1509	36	CB4854	R2D14ind	102516
1062454	1081	4	CB4854	R2D14ind	102518
1062470	1424	70	CB4854	R2D14ind	102534
1062526	1048	28	CB4854	R2D14ind	102590
1062731	1184	25	CB4854	R2D14ind	102795
1062908	1797	27	CB4854	R2D14ind	102972
1062909	985	31	CB4854	R2D14ind	102973
1064636	4089	8	CB4854	R2D14ind	104700
1066437	775	16	CB4854	R2D14ind	106501
1066620	716	10	CB4854	R2D14ind	106684
1066631	2139	38	CB4854	R2D14ind	106695
1066640	1330	15	CB4854	R2D14ind	106704
1066867	3204	62	CB4854	R2D14ind	106931
1074606	3645	57	CB4854	R2D14ind	114670
1075219	1717	12	CB4854	R2D14ind	115283
1075804	620	32	CB4854	R2D14ind	115868
1076177	2383	37	CB4854	R2D14ind	116241
1076271	2744	62	CB4854	R2D14ind	116335
1076383	2134	42	CB4854	R2D14ind	116447
1076470	1333	58	CB4854	R2D14ind	116534
1076602	8130	166	CB4854	R2D14ind	116666
1076785	2327	45	CB4854	R2D14ind	116849
1076866	2	0	CB4854	R2D14ind	116930
1076973	6224	84	CB4854	R2D14ind	117037
1077102	464	11	CB4854	R2D14ind	117166
1080925	508	6	CB4854	R2D1ind	997
1081140	584	0	CB4854	R2D1ind	1212
1081165	416	6	CB4854	R2D1ind	1237
1081188	418	8	CB4854	R2D1ind	1260
1081490	530	4	CB4854	R2D1ind	1562
1081945	1562	8	CB4854	R2D1ind	2017
1083607	284	14	CB4854	R2D1ind	3679
1085087	720	30	CB4854	R2D1ind	5159
1085191	624	2	CB4854	R2D1ind	5263
1085293	557	8	CB4854	R2D1ind	5365
1085553	696	4	CB4854	R2D1ind	5625
1085599	1718	18	CB4854	R2D1ind	5671
1085653	542	6	CB4854	R2D1ind	5725
1085724	243	2	CB4854	R2D1ind	5796
1085795	1572	8	CB4854	R2D1ind	5867
1089011	2085	30	CB4854	R2D1ind	9083
1089091	254	3	CB4854	R2D1ind	9163
1089252	939	2	CB4854	R2D1ind	9324
1089944	375	0	CB4854	R2D1ind	10016
1090196	138	4	CB4854	R2D1ind	10268
1090332	2666	40	CB4854	R2D1ind	10404
1090341	110	0	CB4854	R2D1ind	10413
1090712	939	9	CB4854	R2D1ind	10784
1090815	682	6	CB4854	R2D1ind	10887
1091155	812	22	CB4854	R2D1ind	11227
1091159	738	6	CB4854	R2D1ind	11231
1091206	240	2	CB4854	R2D1ind	11278
1091637	399	9	CB4854	R2D1ind	11709
1091674	484	2	CB4854	R2D1ind	11746
1091801	205	2	CB4854	R2D1ind	11873
1091845	575	0	CB4854	R2D1ind	11917
1091869	602	2	CB4854	R2D1ind	11941
1091880	1697	9	CB4854	R2D1ind	11952
1091918	2188	12	CB4854	R2D1ind	11990
1091921	1166	14	CB4854	R2D1ind	11993
1091978	487	3	CB4854	R2D1ind	12050
1092382	963	12	CB4854	R2D1ind	12454
1092409	434	3	CB4854	R2D1ind	12481
1092507	1651	35	CB4854	R2D1ind	12579
1092541	446	6	CB4854	R2D1ind	12613
1092634	475	3	CB4854	R2D1ind	12706
1092733	249	2	CB4854	R2D1ind	12805
1092749	4421	33	CB4854	R2D1ind	12821
1092763	464	0	CB4854	R2D1ind	12835
1092805	225	0	CB4854	R2D1ind	12877
1103346	885	22	CB4854	R2D1ind	23418
1106266	1350	14	CB4854	R2D1ind	26338
1106903	498	13	CB4854	R2D1ind	26975
1106912	216	4	CB4854	R2D1ind	26984
1107014	861	15	CB4854	R2D1ind	27086
1111487	535	4	CB4854	R2D1ind	31559
1111502	722	2	CB4854	R2D1ind	31574
1111548	186	0	CB4854	R2D1ind	31620
1111903	1305	12	CB4854	R2D1ind	31975
1115061	815	4	CB4854	R2D1ind	35133
1115266	1046	12	CB4854	R2D1ind	35338
1115277	3212	45	CB4854	R2D1ind	35349
1115553	497	4	CB4854	R2D1ind	35625
1115600	1911	9	CB4854	R2D1ind	35672
1115615	952	12	CB4854	R2D1ind	35687
1115645	510	4	CB4854	R2D1ind	35717
1115657	496	16	CB4854	R2D1ind	35729
1115701	257	1	CB4854	R2D1ind	35773
1119066	510	10	CB4854	R2D1ind	39138
1119249	928	2	CB4854	R2D1ind	39321
1120302	739	12	CB4854	R2D1ind	40374
1120399	245	4	CB4854	R2D1ind	40471
1121154	812	22	CB4854	R2D1ind	41226
1121155	740	6	CB4854	R2D1ind	41227
1121162	399	10	CB4854	R2D1ind	41234
1121401	449	3	CB4854	R2D1ind	41473
1121871	737	10	CB4854	R2D1ind	41943
1121990	632	15	CB4854	R2D1ind	42062
1122007	212	1	CB4854	R2D1ind	42079
1122020	198	2	CB4854	R2D1ind	42092
1122192	567	7	CB4854	R2D1ind	42264
1122488	217	2	CB4854	R2D1ind	42560
1122521	155	0	CB4854	R2D1ind	42593
1122529	2039	7	CB4854	R2D1ind	42601
1122545	404	6	CB4854	R2D1ind	42617
1122549	333	6	CB4854	R2D1ind	42621
1122749	4421	11	CB4854	R2D1ind	42821
1126617	236	2	CB4854	R2D1ind	46689
1126621	1401	10	CB4854	R2D1ind	46693
1136199	444	16	CB4854	R2D1ind	56271
1136358	316	4	CB4854	R2D1ind	56430
1136756	543	6	CB4854	R2D1ind	56828
1136995	528	2	CB4854	R2D1ind	57067
1137014	868	15	CB4854	R2D1ind	57086
1141137	584	0	CB4854	R2D1ind	61209
1141185	424	8	CB4854	R2D1ind	61257
1141573	1181	3	CB4854	R2D1ind	61645
1141595	1014	3	CB4854	R2D1ind	61667
1141892	633	4	CB4854	R2D1ind	61964
1145065	407	11	CB4854	R2D1ind	65137
1145376	231	3	CB4854	R2D1ind	65448
1145558	857	12	CB4854	R2D1ind	65630
1145562	1424	32	CB4854	R2D1ind	65634
1145597	1892	3	CB4854	R2D1ind	65669
1145647	540	9	CB4854	R2D1ind	65719
1145692	1080	16	CB4854	R2D1ind	65764
1145818	519	3	CB4854	R2D1ind	65890
1145860	117	4	CB4854	R2D1ind	65932
1149359	579	12	CB4854	R2D1ind	69431
1149838	1824	18	CB4854	R2D1ind	69910
1149853	675	42	CB4854	R2D1ind	69925
1150049	1691	18	CB4854	R2D1ind	70121
1150908	913	14	CB4854	R2D1ind	70980
1150923	322	10	CB4854	R2D1ind	70995
1151347	658	9	CB4854	R2D1ind	71419
1151528	303	2	CB4854	R2D1ind	71600
1151661	488	7	CB4854	R2D1ind	71733
1152020	282	5	CB4854	R2D1ind	72092
1152048	510	2	CB4854	R2D1ind	72120
1152431	1720	6	CB4854	R2D1ind	72503
1152438	341	2	CB4854	R2D1ind	72510
1152771	1100	6	CB4854	R2D1ind	72843
1156596	2184	21	CB4854	R2D1ind	76668
1166084	1020	8	CB4854	R2D1ind	86156
1166201	0	0	CB4854	R2D1ind	86273
1166257	447	18	CB4854	R2D1ind	86329
1171496	381	6	CB4854	R2D1ind	91568
1171774	232	2	CB4854	R2D1ind	91846
1171785	352	5	CB4854	R2D1ind	91857
1171852	888	14	CB4854	R2D1ind	91924
1175191	219	2	CB4854	R2D1ind	95263
1175218	2035	40	CB4854	R2D1ind	95290
1175232	176	2	CB4854	R2D1ind	95304
1175487	252	2	CB4854	R2D1ind	95559
1175553	177	3	CB4854	R2D1ind	95625
1175558	1414	32	CB4854	R2D1ind	95630
1175564	1492	8	CB4854	R2D1ind	95636
1175688	1105	20	CB4854	R2D1ind	95760
1175802	233	0	CB4854	R2D1ind	95874
1175880	161	1	CB4854	R2D1ind	95952
1175912	540	8	CB4854	R2D1ind	95984
1178866	471	12	CB4854	R2D1ind	98938
1178900	352	2	CB4854	R2D1ind	98972
1179351	1241	15	CB4854	R2D1ind	99423
1179391	1764	0	CB4854	R2D1ind	99463
1179546	416	18	CB4854	R2D1ind	99618
1179837	1815	18	CB4854	R2D1ind	99909
1179841	1809	18	CB4854	R2D1ind	99913
1180261	235	2	CB4854	R2D1ind	100333
1180338	287	0	CB4854	R2D1ind	100410
1180339	287	0	CB4854	R2D1ind	100411
1180358	148	0	CB4854	R2D1ind	100430
1181152	740	6	CB4854	R2D1ind	101224
1181154	1228	12	CB4854	R2D1ind	101226
1181155	1231	12	CB4854	R2D1ind	101227
1181156	1231	12	CB4854	R2D1ind	101228
1181703	511	11	CB4854	R2D1ind	101775
1181938	1320	48	CB4854	R2D1ind	102010
1182022	291	1	CB4854	R2D1ind	102094
1182029	149	8	CB4854	R2D1ind	102101
1182054	374	9	CB4854	R2D1ind	102126
1182371	508	2	CB4854	R2D1ind	102443
1182444	474	4	CB4854	R2D1ind	102516
1182446	275	6	CB4854	R2D1ind	102518
1182462	438	6	CB4854	R2D1ind	102534
1182518	554	6	CB4854	R2D1ind	102590
1182723	409	3	CB4854	R2D1ind	102795
1182900	437	4	CB4854	R2D1ind	102972
1182901	340	6	CB4854	R2D1ind	102973
1184628	2637	58	CB4854	R2D1ind	104700
1186429	236	4	CB4854	R2D1ind	106501
1186612	237	2	CB4854	R2D1ind	106684
1186623	414	6	CB4854	R2D1ind	106695
1186632	350	1	CB4854	R2D1ind	106704
1186859	752	10	CB4854	R2D1ind	106931
1194598	1134	12	CB4854	R2D1ind	114670
1195211	495	8	CB4854	R2D1ind	115283
1195796	308	0	CB4854	R2D1ind	115868
1196169	609	3	CB4854	R2D1ind	116241
1196263	908	4	CB4854	R2D1ind	116335
1196375	1221	20	CB4854	R2D1ind	116447
1196462	773	10	CB4854	R2D1ind	116534
1196594	1599	18	CB4854	R2D1ind	116666
1196777	650	4	CB4854	R2D1ind	116849
1196858	230	2	CB4854	R2D1ind	116930
1196965	1204	26	CB4854	R2D1ind	117037
1197094	126	2	CB4854	R2D1ind	117166
1200917	580	13	CB4854	R2D21ind	997
1201132	712	2	CB4854	R2D21ind	1212
1201157	498	10	CB4854	R2D21ind	1237
1201180	524	8	CB4854	R2D21ind	1260
1201482	522	12	CB4854	R2D21ind	1562
1201937	1661	16	CB4854	R2D21ind	2017
1203599	392	6	CB4854	R2D21ind	3679
1205079	803	26	CB4854	R2D21ind	5159
1205183	656	8	CB4854	R2D21ind	5263
1205285	892	17	CB4854	R2D21ind	5365
1205545	720	6	CB4854	R2D21ind	5625
1205591	1568	27	CB4854	R2D21ind	5671
1205645	598	3	CB4854	R2D21ind	5725
1205716	317	3	CB4854	R2D21ind	5796
1205787	1435	40	CB4854	R2D21ind	5867
1209003	2032	36	CB4854	R2D21ind	9083
1209083	286	4	CB4854	R2D21ind	9163
1209244	885	6	CB4854	R2D21ind	9324
1209936	475	4	CB4854	R2D21ind	10016
1210188	208	8	CB4854	R2D21ind	10268
1210324	2835	20	CB4854	R2D21ind	10404
1210333	168	2	CB4854	R2D21ind	10413
1210704	1050	21	CB4854	R2D21ind	10784
1210807	836	10	CB4854	R2D21ind	10887
1211147	888	10	CB4854	R2D21ind	11227
1211151	822	9	CB4854	R2D21ind	11231
1211198	207	0	CB4854	R2D21ind	11278
1211629	426	5	CB4854	R2D21ind	11709
1211666	595	10	CB4854	R2D21ind	11746
1211793	255	5	CB4854	R2D21ind	11873
1211837	636	10	CB4854	R2D21ind	11917
1211861	578	6	CB4854	R2D21ind	11941
1211872	1786	51	CB4854	R2D21ind	11952
1211910	2569	53	CB4854	R2D21ind	11990
1211913	1174	28	CB4854	R2D21ind	11993
1211970	472	8	CB4854	R2D21ind	12050
1212374	1043	12	CB4854	R2D21ind	12454
1212401	460	8	CB4854	R2D21ind	12481
1212499	1845	55	CB4854	R2D21ind	12579
1212533	440	6	CB4854	R2D21ind	12613
1212626	481	8	CB4854	R2D21ind	12706
1212725	249	3	CB4854	R2D21ind	12805
1212741	6731	110	CB4854	R2D21ind	12821
1212755	478	11	CB4854	R2D21ind	12835
1212797	236	1	CB4854	R2D21ind	12877
1223338	838	16	CB4854	R2D21ind	23418
1226258	1140	18	CB4854	R2D21ind	26338
1226895	472	9	CB4854	R2D21ind	26975
1226904	253	3	CB4854	R2D21ind	26984
1227006	754	18	CB4854	R2D21ind	27086
1231479	531	14	CB4854	R2D21ind	31559
1231494	776	20	CB4854	R2D21ind	31574
1231540	270	2	CB4854	R2D21ind	31620
1231895	1446	42	CB4854	R2D21ind	31975
1235053	814	10	CB4854	R2D21ind	35133
1235258	1116	12	CB4854	R2D21ind	35338
1235269	3196	25	CB4854	R2D21ind	35349
1235545	521	3	CB4854	R2D21ind	35625
1235592	2056	14	CB4854	R2D21ind	35672
1235607	1134	14	CB4854	R2D21ind	35687
1235637	581	8	CB4854	R2D21ind	35717
1235649	574	6	CB4854	R2D21ind	35729
1235693	259	5	CB4854	R2D21ind	35773
1239058	550	4	CB4854	R2D21ind	39138
1239241	868	6	CB4854	R2D21ind	39321
1240294	795	14	CB4854	R2D21ind	40374
1240391	346	1	CB4854	R2D21ind	40471
1241146	899	6	CB4854	R2D21ind	41226
1241147	839	9	CB4854	R2D21ind	41227
1241154	476	25	CB4854	R2D21ind	41234
1241393	398	4	CB4854	R2D21ind	41473
1241863	692	6	CB4854	R2D21ind	41943
1241982	567	36	CB4854	R2D21ind	42062
1241999	217	0	CB4854	R2D21ind	42079
1242012	231	3	CB4854	R2D21ind	42092
1242184	1043	10	CB4854	R2D21ind	42264
1242480	199	5	CB4854	R2D21ind	42560
1242513	191	7	CB4854	R2D21ind	42593
1242521	2152	25	CB4854	R2D21ind	42601
1242537	364	3	CB4854	R2D21ind	42617
1242541	325	3	CB4854	R2D21ind	42621
1242741	6747	88	CB4854	R2D21ind	42821
1246609	266	4	CB4854	R2D21ind	46689
1246613	1760	32	CB4854	R2D21ind	46693
1256191	417	2	CB4854	R2D21ind	56271
1256350	363	6	CB4854	R2D21ind	56430
1256748	549	14	CB4854	R2D21ind	56828
1256987	507	2	CB4854	R2D21ind	57067
1257006	765	18	CB4854	R2D21ind	57086
1261129	714	2	CB4854	R2D21ind	61209
1261177	528	9	CB4854	R2D21ind	61257
1261565	1114	36	CB4854	R2D21ind	61645
1261587	871	12	CB4854	R2D21ind	61667
1261884	695	24	CB4854	R2D21ind	61964
1265057	407	17	CB4854	R2D21ind	65137
1265368	450	3	CB4854	R2D21ind	65448
1265550	1188	3	CB4854	R2D21ind	65630
1265554	1721	20	CB4854	R2D21ind	65634
1265589	2037	0	CB4854	R2D21ind	65669
1265639	594	3	CB4854	R2D21ind	65719
1265684	828	16	CB4854	R2D21ind	65764
1265810	544	7	CB4854	R2D21ind	65890
1265852	134	3	CB4854	R2D21ind	65932
1269351	506	5	CB4854	R2D21ind	69431
1269830	2549	18	CB4854	R2D21ind	69910
1269845	537	9	CB4854	R2D21ind	69925
1270041	1888	15	CB4854	R2D21ind	70121
1270900	976	6	CB4854	R2D21ind	70980
1270915	450	4	CB4854	R2D21ind	70995
1271339	591	7	CB4854	R2D21ind	71419
1271520	356	2	CB4854	R2D21ind	71600
1271653	490	10	CB4854	R2D21ind	71733
1272012	310	7	CB4854	R2D21ind	72092
1272040	483	16	CB4854	R2D21ind	72120
1272423	1970	8	CB4854	R2D21ind	72503
1272430	381	4	CB4854	R2D21ind	72510
1272763	1203	18	CB4854	R2D21ind	72843
1276588	2481	33	CB4854	R2D21ind	76668
1286076	1036	16	CB4854	R2D21ind	86156
1286193	0	0	CB4854	R2D21ind	86273
1286249	480	12	CB4854	R2D21ind	86329
1291488	558	21	CB4854	R2D21ind	91568
1291766	258	2	CB4854	R2D21ind	91846
1291777	416	5	CB4854	R2D21ind	91857
1291844	1128	28	CB4854	R2D21ind	91924
1295183	249	2	CB4854	R2D21ind	95263
1295210	2463	69	CB4854	R2D21ind	95290
1295224	192	6	CB4854	R2D21ind	95304
1295479	309	12	CB4854	R2D21ind	95559
1295545	262	7	CB4854	R2D21ind	95625
1295550	1710	16	CB4854	R2D21ind	95630
1295556	1708	8	CB4854	R2D21ind	95636
1295680	848	12	CB4854	R2D21ind	95760
1295794	284	7	CB4854	R2D21ind	95874
1295872	171	3	CB4854	R2D21ind	95952
1295904	416	10	CB4854	R2D21ind	95984
1298858	539	12	CB4854	R2D21ind	98938
1298892	370	5	CB4854	R2D21ind	98972
1299343	1306	20	CB4854	R2D21ind	99423
1299383	2392	27	CB4854	R2D21ind	99463
1299538	543	15	CB4854	R2D21ind	99618
1299829	2543	18	CB4854	R2D21ind	99909
1299833	2526	18	CB4854	R2D21ind	99913
1300253	252	5	CB4854	R2D21ind	100333
1300330	357	16	CB4854	R2D21ind	100410
1300331	357	16	CB4854	R2D21ind	100411
1300350	274	0	CB4854	R2D21ind	100430
1301144	832	9	CB4854	R2D21ind	101224
1301146	1515	16	CB4854	R2D21ind	101226
1301147	1530	16	CB4854	R2D21ind	101227
1301148	1530	16	CB4854	R2D21ind	101228
1301695	441	13	CB4854	R2D21ind	101775
1301930	1386	42	CB4854	R2D21ind	102010
1302014	329	8	CB4854	R2D21ind	102094
1302021	162	7	CB4854	R2D21ind	102101
1302046	368	9	CB4854	R2D21ind	102126
1302363	562	10	CB4854	R2D21ind	102443
1302436	418	7	CB4854	R2D21ind	102516
1302438	302	3	CB4854	R2D21ind	102518
1302454	480	4	CB4854	R2D21ind	102534
1302510	516	6	CB4854	R2D21ind	102590
1302715	359	9	CB4854	R2D21ind	102795
1302892	400	6	CB4854	R2D21ind	102972
1302893	324	5	CB4854	R2D21ind	102973
1304620	2675	44	CB4854	R2D21ind	104700
1306421	288	7	CB4854	R2D21ind	106501
1306604	268	4	CB4854	R2D21ind	106684
1306615	402	12	CB4854	R2D21ind	106695
1306624	362	8	CB4854	R2D21ind	106704
1306851	822	22	CB4854	R2D21ind	106931
1314590	1242	9	CB4854	R2D21ind	114670
1315203	561	11	CB4854	R2D21ind	115283
1315788	335	3	CB4854	R2D21ind	115868
1316161	563	5	CB4854	R2D21ind	116241
1316255	792	20	CB4854	R2D21ind	116335
1316367	1138	14	CB4854	R2D21ind	116447
1316454	807	10	CB4854	R2D21ind	116534
1316586	2417	48	CB4854	R2D21ind	116666
1316769	652	8	CB4854	R2D21ind	116849
1316850	279	6	CB4854	R2D21ind	116930
1316957	1220	12	CB4854	R2D21ind	117037
1317086	182	3	CB4854	R2D21ind	117166
1320909	2171	0	CB4854	R2D24ind	997
1321124	2169	8	CB4854	R2D24ind	1212
1321149	1792	2	CB4854	R2D24ind	1237
1321172	1814	2	CB4854	R2D24ind	1260
1321474	1402	4	CB4854	R2D24ind	1562
1321929	7876	8	CB4854	R2D24ind	2017
1323591	1804	0	CB4854	R2D24ind	3679
1325071	3233	0	CB4854	R2D24ind	5159
1325175	1759	2	CB4854	R2D24ind	5263
1325277	2687	4	CB4854	R2D24ind	5365
1325537	3403	2	CB4854	R2D24ind	5625
1325583	7530	10	CB4854	R2D24ind	5671
1325637	2929	6	CB4854	R2D24ind	5725
1325708	971	0	CB4854	R2D24ind	5796
1325779	5496	4	CB4854	R2D24ind	5867
1328995	6877	20	CB4854	R2D24ind	9083
1329075	1	0	CB4854	R2D24ind	9163
1329236	3980	6	CB4854	R2D24ind	9324
1329928	1803	0	CB4854	R2D24ind	10016
1330180	954	0	CB4854	R2D24ind	10268
1330316	8309	0	CB4854	R2D24ind	10404
1330325	932	0	CB4854	R2D24ind	10413
1330696	4283	0	CB4854	R2D24ind	10784
1330799	2850	2	CB4854	R2D24ind	10887
1331139	2968	0	CB4854	R2D24ind	11227
1331143	3351	0	CB4854	R2D24ind	11231
1331190	761	0	CB4854	R2D24ind	11278
1331621	1537	2	CB4854	R2D24ind	11709
1331658	1608	0	CB4854	R2D24ind	11746
1331785	785	0	CB4854	R2D24ind	11873
1331829	1656	0	CB4854	R2D24ind	11917
1331853	2101	1	CB4854	R2D24ind	11941
1331864	6877	6	CB4854	R2D24ind	11952
1331902	6297	0	CB4854	R2D24ind	11990
1331905	4402	0	CB4854	R2D24ind	11993
1331962	1310	0	CB4854	R2D24ind	12050
1332366	4407	0	CB4854	R2D24ind	12454
1332393	647	4	CB4854	R2D24ind	12481
1332491	6203	0	CB4854	R2D24ind	12579
1332525	1518	2	CB4854	R2D24ind	12613
1332618	1761	0	CB4854	R2D24ind	12706
1332717	992	0	CB4854	R2D24ind	12805
1332733	38338	22	CB4854	R2D24ind	12821
1332747	1865	1	CB4854	R2D24ind	12835
1332789	879	0	CB4854	R2D24ind	12877
1343330	1600	2	CB4854	R2D24ind	23418
1346250	3058	0	CB4854	R2D24ind	26338
1346887	0	0	CB4854	R2D24ind	26975
1346896	554	0	CB4854	R2D24ind	26984
1346998	3764	0	CB4854	R2D24ind	27086
1351471	1412	2	CB4854	R2D24ind	31559
1351486	2798	0	CB4854	R2D24ind	31574
1351532	73	0	CB4854	R2D24ind	31620
1351887	5117	3	CB4854	R2D24ind	31975
1355045	3197	0	CB4854	R2D24ind	35133
1355250	2266	0	CB4854	R2D24ind	35338
1355261	8829	10	CB4854	R2D24ind	35349
1355537	2448	1	CB4854	R2D24ind	35625
1355584	7702	2	CB4854	R2D24ind	35672
1355599	5562	0	CB4854	R2D24ind	35687
1355629	2813	2	CB4854	R2D24ind	35717
1355641	1893	0	CB4854	R2D24ind	35729
1355685	912	0	CB4854	R2D24ind	35773
1359050	1793	0	CB4854	R2D24ind	39138
1359233	3914	0	CB4854	R2D24ind	39321
1360286	3526	2	CB4854	R2D24ind	40374
1360383	1093	0	CB4854	R2D24ind	40471
1361138	3012	0	CB4854	R2D24ind	41226
1361139	3416	0	CB4854	R2D24ind	41227
1361146	1722	2	CB4854	R2D24ind	41234
1361385	1269	0	CB4854	R2D24ind	41473
1361855	3158	0	CB4854	R2D24ind	41943
1361974	1734	6	CB4854	R2D24ind	42062
1361991	983	0	CB4854	R2D24ind	42079
1362004	794	0	CB4854	R2D24ind	42092
1362176	3111	0	CB4854	R2D24ind	42264
1362472	606	0	CB4854	R2D24ind	42560
1362505	599	3	CB4854	R2D24ind	42593
1362513	6277	4	CB4854	R2D24ind	42601
1362529	1619	0	CB4854	R2D24ind	42617
1362533	915	0	CB4854	R2D24ind	42621
1362733	38417	11	CB4854	R2D24ind	42821
1366601	938	10	CB4854	R2D24ind	46689
1366605	2648	0	CB4854	R2D24ind	46693
1376183	1744	0	CB4854	R2D24ind	56271
1376342	1202	0	CB4854	R2D24ind	56430
1376740	1911	0	CB4854	R2D24ind	56828
1376979	2204	0	CB4854	R2D24ind	57067
1376998	3777	0	CB4854	R2D24ind	57086
1381121	2183	8	CB4854	R2D24ind	61209
1381169	1812	2	CB4854	R2D24ind	61257
1381557	3746	0	CB4854	R2D24ind	61645
1381579	3345	6	CB4854	R2D24ind	61667
1381876	3414	8	CB4854	R2D24ind	61964
1385049	1361	0	CB4854	R2D24ind	65137
1385360	1920	0	CB4854	R2D24ind	65448
1385542	3024	0	CB4854	R2D24ind	65630
1385546	4078	4	CB4854	R2D24ind	65634
1385581	7691	0	CB4854	R2D24ind	65669
1385631	2916	0	CB4854	R2D24ind	65719
1385676	2432	0	CB4854	R2D24ind	65764
1385802	2358	0	CB4854	R2D24ind	65890
1385844	496	0	CB4854	R2D24ind	65932
1389343	1894	1	CB4854	R2D24ind	69431
1389822	18155	72	CB4854	R2D24ind	69910
1389837	3816	0	CB4854	R2D24ind	69925
1390033	7040	3	CB4854	R2D24ind	70121
1390892	3155	0	CB4854	R2D24ind	70980
1390907	1352	4	CB4854	R2D24ind	70995
1391331	2630	1	CB4854	R2D24ind	71419
1391512	845	0	CB4854	R2D24ind	71600
1391645	1503	1	CB4854	R2D24ind	71733
1392004	940	0	CB4854	R2D24ind	72092
1392032	1595	0	CB4854	R2D24ind	72120
1392415	5855	0	CB4854	R2D24ind	72503
1392422	1705	1	CB4854	R2D24ind	72510
1392755	3934	2	CB4854	R2D24ind	72843
1396580	9697	3	CB4854	R2D24ind	76668
1406068	4945	2	CB4854	R2D24ind	86156
1406185	15	0	CB4854	R2D24ind	86273
1406241	1611	3	CB4854	R2D24ind	86329
1411480	2479	0	CB4854	R2D24ind	91568
1411758	691	2	CB4854	R2D24ind	91846
1411769	1628	0	CB4854	R2D24ind	91857
1411836	2250	2	CB4854	R2D24ind	91924
1415175	685	0	CB4854	R2D24ind	95263
1415202	11285	10	CB4854	R2D24ind	95290
1415216	1054	0	CB4854	R2D24ind	95304
1415471	870	0	CB4854	R2D24ind	95559
1415537	719	0	CB4854	R2D24ind	95625
1415542	4023	8	CB4854	R2D24ind	95630
1415548	3284	20	CB4854	R2D24ind	95636
1415672	2476	0	CB4854	R2D24ind	95760
1415786	1531	0	CB4854	R2D24ind	95874
1415864	775	2	CB4854	R2D24ind	95952
1415896	1737	2	CB4854	R2D24ind	95984
1418850	1764	7	CB4854	R2D24ind	98938
1418884	1428	0	CB4854	R2D24ind	98972
1419335	2905	0	CB4854	R2D24ind	99423
1419375	4971	3	CB4854	R2D24ind	99463
1419530	1777	0	CB4854	R2D24ind	99618
1419821	18086	72	CB4854	R2D24ind	99909
1419825	17933	72	CB4854	R2D24ind	99913
1420245	1090	0	CB4854	R2D24ind	100333
1420322	863	0	CB4854	R2D24ind	100410
1420323	863	0	CB4854	R2D24ind	100411
1420342	738	0	CB4854	R2D24ind	100430
1421136	3375	6	CB4854	R2D24ind	101224
1421138	3978	8	CB4854	R2D24ind	101226
1421139	4081	0	CB4854	R2D24ind	101227
1421140	4081	0	CB4854	R2D24ind	101228
1421687	1569	1	CB4854	R2D24ind	101775
1421922	3778	0	CB4854	R2D24ind	102010
1422006	1025	0	CB4854	R2D24ind	102094
1422013	385	0	CB4854	R2D24ind	102101
1422038	1135	0	CB4854	R2D24ind	102126
1422355	1501	0	CB4854	R2D24ind	102443
1422428	2041	0	CB4854	R2D24ind	102516
1422430	1348	0	CB4854	R2D24ind	102518
1422446	1716	2	CB4854	R2D24ind	102534
1422502	1734	2	CB4854	R2D24ind	102590
1422707	1802	2	CB4854	R2D24ind	102795
1422884	1853	1	CB4854	R2D24ind	102972
1422885	1044	3	CB4854	R2D24ind	102973
1424612	5897	0	CB4854	R2D24ind	104700
1426413	962	7	CB4854	R2D24ind	106501
1426596	947	10	CB4854	R2D24ind	106684
1426607	2035	1	CB4854	R2D24ind	106695
1426616	1126	0	CB4854	R2D24ind	106704
1426843	4192	4	CB4854	R2D24ind	106931
1434582	3870	0	CB4854	R2D24ind	114670
1435195	1498	1	CB4854	R2D24ind	115283
1435780	799	0	CB4854	R2D24ind	115868
1436153	2115	0	CB4854	R2D24ind	116241
1436247	2437	4	CB4854	R2D24ind	116335
1436359	3394	4	CB4854	R2D24ind	116447
1436446	1743	2	CB4854	R2D24ind	116534
1436578	13040	18	CB4854	R2D24ind	116666
1436761	2170	0	CB4854	R2D24ind	116849
1436842	2	0	CB4854	R2D24ind	116930
1436949	6144	2	CB4854	R2D24ind	117037
1437078	607	0	CB4854	R2D24ind	117166
1440901	2442	53	CB4854	R2D7ind	997
1441116	2684	42	CB4854	R2D7ind	1212
1441141	1206	16	CB4854	R2D7ind	1237
1441164	956	36	CB4854	R2D7ind	1260
1441466	1230	48	CB4854	R2D7ind	1562
1441921	8970	104	CB4854	R2D7ind	2017
1443583	1046	12	CB4854	R2D7ind	3679
1445063	3537	73	CB4854	R2D7ind	5159
1445167	1889	38	CB4854	R2D7ind	5263
1445269	601	4	CB4854	R2D7ind	5365
1445529	3246	80	CB4854	R2D7ind	5625
1445575	7151	86	CB4854	R2D7ind	5671
1445629	3150	84	CB4854	R2D7ind	5725
1445700	965	8	CB4854	R2D7ind	5796
1445771	6840	24	CB4854	R2D7ind	5867
1448987	9387	96	CB4854	R2D7ind	9083
1449067	0	0	CB4854	R2D7ind	9163
1449228	3915	22	CB4854	R2D7ind	9324
1449920	1453	8	CB4854	R2D7ind	10016
1450172	1226	32	CB4854	R2D7ind	10268
1450308	5170	40	CB4854	R2D7ind	10404
1450317	860	4	CB4854	R2D7ind	10413
1450688	3789	87	CB4854	R2D7ind	10784
1450791	2808	20	CB4854	R2D7ind	10887
1451131	3454	44	CB4854	R2D7ind	11227
1451135	2922	24	CB4854	R2D7ind	11231
1451182	1455	55	CB4854	R2D7ind	11278
1451613	2087	38	CB4854	R2D7ind	11709
1451650	1820	18	CB4854	R2D7ind	11746
1451777	1738	25	CB4854	R2D7ind	11873
1451821	2213	26	CB4854	R2D7ind	11917
1451845	1201	13	CB4854	R2D7ind	11941
1451856	2829	30	CB4854	R2D7ind	11952
1451894	3798	33	CB4854	R2D7ind	11990
1451897	4410	46	CB4854	R2D7ind	11993
1451954	1187	17	CB4854	R2D7ind	12050
1452358	4596	50	CB4854	R2D7ind	12454
1452385	695	4	CB4854	R2D7ind	12481
1452483	4055	45	CB4854	R2D7ind	12579
1452517	1480	10	CB4854	R2D7ind	12613
1452610	2235	36	CB4854	R2D7ind	12706
1452709	937	4	CB4854	R2D7ind	12805
1452725	23158	253	CB4854	R2D7ind	12821
1452739	1316	16	CB4854	R2D7ind	12835
1452781	1028	27	CB4854	R2D7ind	12877
1463322	1264	26	CB4854	R2D7ind	23418
1466242	1962	16	CB4854	R2D7ind	26338
1466879	2	0	CB4854	R2D7ind	26975
1466888	728	0	CB4854	R2D7ind	26984
1466990	3685	15	CB4854	R2D7ind	27086
1471463	1232	48	CB4854	R2D7ind	31559
1471478	1664	56	CB4854	R2D7ind	31574
1471524	134	2	CB4854	R2D7ind	31620
1471879	3988	18	CB4854	R2D7ind	31975
1475037	3025	14	CB4854	R2D7ind	35133
1475242	2098	42	CB4854	R2D7ind	35338
1475253	6565	40	CB4854	R2D7ind	35349
1475529	2243	44	CB4854	R2D7ind	35625
1475576	6056	59	CB4854	R2D7ind	35672
1475591	5241	72	CB4854	R2D7ind	35687
1475621	3199	91	CB4854	R2D7ind	35717
1475633	2281	10	CB4854	R2D7ind	35729
1475677	858	17	CB4854	R2D7ind	35773
1479042	3030	30	CB4854	R2D7ind	39138
1479225	3872	18	CB4854	R2D7ind	39321
1480278	3625	66	CB4854	R2D7ind	40374
1480375	902	11	CB4854	R2D7ind	40471
1481130	3488	42	CB4854	R2D7ind	41226
1481131	2968	33	CB4854	R2D7ind	41227
1481138	1454	14	CB4854	R2D7ind	41234
1481377	1332	32	CB4854	R2D7ind	41473
1481847	4371	68	CB4854	R2D7ind	41943
1481966	1848	66	CB4854	R2D7ind	42062
1481983	764	9	CB4854	R2D7ind	42079
1481996	596	13	CB4854	R2D7ind	42092
1482168	3988	33	CB4854	R2D7ind	42264
1482464	2859	9	CB4854	R2D7ind	42560
1482497	343	12	CB4854	R2D7ind	42593
1482505	7685	228	CB4854	R2D7ind	42601
1482521	1403	27	CB4854	R2D7ind	42617
1482525	1190	20	CB4854	R2D7ind	42621
1482725	23221	263	CB4854	R2D7ind	42821
1486593	1200	4	CB4854	R2D7ind	46689
1486597	2946	4	CB4854	R2D7ind	46693
1496175	1541	34	CB4854	R2D7ind	56271
1496334	1571	26	CB4854	R2D7ind	56430
1496732	3484	84	CB4854	R2D7ind	56828
1496971	2258	32	CB4854	R2D7ind	57067
1496990	3690	15	CB4854	R2D7ind	57086
1501113	2689	42	CB4854	R2D7ind	61209
1501161	956	34	CB4854	R2D7ind	61257
1501549	2709	39	CB4854	R2D7ind	61645
1501571	4919	54	CB4854	R2D7ind	61667
1501868	4846	60	CB4854	R2D7ind	61964
1505041	1780	61	CB4854	R2D7ind	65137
1505352	1749	0	CB4854	R2D7ind	65448
1505534	2550	27	CB4854	R2D7ind	65630
1505538	3888	32	CB4854	R2D7ind	65634
1505573	6006	20	CB4854	R2D7ind	65669
1505623	3138	81	CB4854	R2D7ind	65719
1505668	4164	40	CB4854	R2D7ind	65764
1505794	2626	37	CB4854	R2D7ind	65890
1505836	472	11	CB4854	R2D7ind	65932
1509335	545	3	CB4854	R2D7ind	69431
1509814	7446	45	CB4854	R2D7ind	69910
1509829	3152	114	CB4854	R2D7ind	69925
1510025	8113	117	CB4854	R2D7ind	70121
1510884	2946	20	CB4854	R2D7ind	70980
1510899	1395	28	CB4854	R2D7ind	70995
1511323	1192	4	CB4854	R2D7ind	71419
1511504	851	16	CB4854	R2D7ind	71600
1511637	1327	23	CB4854	R2D7ind	71733
1511996	779	11	CB4854	R2D7ind	72092
1512024	2121	38	CB4854	R2D7ind	72120
1512407	2865	12	CB4854	R2D7ind	72503
1512414	447	3	CB4854	R2D7ind	72510
1512747	3748	52	CB4854	R2D7ind	72843
1516572	8440	66	CB4854	R2D7ind	76668
1526060	5358	58	CB4854	R2D7ind	86156
1526177	567	18	CB4854	R2D7ind	86273
1526233	4302	68	CB4854	R2D7ind	86329
1531472	2282	45	CB4854	R2D7ind	91568
1531750	1692	42	CB4854	R2D7ind	91846
1531761	1594	17	CB4854	R2D7ind	91857
1531828	1835	56	CB4854	R2D7ind	91924
1535167	407	13	CB4854	R2D7ind	95263
1535194	8412	100	CB4854	R2D7ind	95290
1535208	968	18	CB4854	R2D7ind	95304
1535463	475	1	CB4854	R2D7ind	95559
1535529	869	23	CB4854	R2D7ind	95625
1535534	3866	28	CB4854	R2D7ind	95630
1535540	4292	80	CB4854	R2D7ind	95636
1535664	4210	40	CB4854	R2D7ind	95760
1535778	1541	6	CB4854	R2D7ind	95874
1535856	792	10	CB4854	R2D7ind	95952
1535888	1795	34	CB4854	R2D7ind	95984
1538842	2107	16	CB4854	R2D7ind	98938
1538876	1425	28	CB4854	R2D7ind	98972
1539327	4330	105	CB4854	R2D7ind	99423
1539367	3656	39	CB4854	R2D7ind	99463
1539522	656	18	CB4854	R2D7ind	99618
1539813	7425	45	CB4854	R2D7ind	99909
1539817	7425	45	CB4854	R2D7ind	99913
1540237	1072	5	CB4854	R2D7ind	100333
1540314	1077	0	CB4854	R2D7ind	100410
1540315	1077	0	CB4854	R2D7ind	100411
1540334	544	10	CB4854	R2D7ind	100430
1541128	2926	24	CB4854	R2D7ind	101224
1541130	2404	48	CB4854	R2D7ind	101226
1541131	2407	48	CB4854	R2D7ind	101227
1541132	2407	48	CB4854	R2D7ind	101228
1541679	1145	3	CB4854	R2D7ind	101775
1541914	2766	12	CB4854	R2D7ind	102010
1541998	1154	21	CB4854	R2D7ind	102094
1542005	575	13	CB4854	R2D7ind	102101
1542030	1292	19	CB4854	R2D7ind	102126
1542347	2038	26	CB4854	R2D7ind	102443
1542420	2814	51	CB4854	R2D7ind	102516
1542422	1499	13	CB4854	R2D7ind	102518
1542438	2189	48	CB4854	R2D7ind	102534
1542494	1340	8	CB4854	R2D7ind	102590
1542699	2070	56	CB4854	R2D7ind	102795
1542876	1944	26	CB4854	R2D7ind	102972
1542877	1722	40	CB4854	R2D7ind	102973
1544604	5547	20	CB4854	R2D7ind	104700
1546405	894	12	CB4854	R2D7ind	106501
1546588	1210	4	CB4854	R2D7ind	106684
1546599	2785	57	CB4854	R2D7ind	106695
1546608	1627	35	CB4854	R2D7ind	106704
1546835	3861	20	CB4854	R2D7ind	106931
1554574	4419	78	CB4854	R2D7ind	114670
1555187	1569	15	CB4854	R2D7ind	115283
1555772	697	0	CB4854	R2D7ind	115868
1556145	2761	33	CB4854	R2D7ind	116241
1556239	3802	26	CB4854	R2D7ind	116335
1556351	670	2	CB4854	R2D7ind	116447
1556438	1168	62	CB4854	R2D7ind	116534
1556570	7370	168	CB4854	R2D7ind	116666
1556753	2964	43	CB4854	R2D7ind	116849
1556834	1	0	CB4854	R2D7ind	116930
1556941	7868	124	CB4854	R2D7ind	117037
1557070	575	8	CB4854	R2D7ind	117166
1560893	1188	2	CB4854	RID16ind	997
1561108	1006	8	CB4854	RID16ind	1212
1561133	712	12	CB4854	RID16ind	1237
1561156	458	22	CB4854	RID16ind	1260
1561458	818	14	CB4854	RID16ind	1562
1561913	2825	0	CB4854	RID16ind	2017
1563575	520	14	CB4854	RID16ind	3679
1565055	1254	46	CB4854	RID16ind	5159
1565159	710	18	CB4854	RID16ind	5263
1565261	463	5	CB4854	RID16ind	5365
1565521	1088	22	CB4854	RID16ind	5625
1565567	3693	32	CB4854	RID16ind	5671
1565621	816	27	CB4854	RID16ind	5725
1565692	262	0	CB4854	RID16ind	5796
1565763	1572	16	CB4854	RID16ind	5867
1568979	2824	56	CB4854	RID16ind	9083
1569059	0	0	CB4854	RID16ind	9163
1569220	1874	16	CB4854	RID16ind	9324
1569912	326	10	CB4854	RID16ind	10016
1570164	186	0	CB4854	RID16ind	10268
1570300	2690	0	CB4854	RID16ind	10404
1570309	222	0	CB4854	RID16ind	10413
1570680	1488	9	CB4854	RID16ind	10784
1570783	890	0	CB4854	RID16ind	10887
1571123	1208	8	CB4854	RID16ind	11227
1571127	1161	12	CB4854	RID16ind	11231
1571174	147	1	CB4854	RID16ind	11278
1571605	640	21	CB4854	RID16ind	11709
1571642	484	4	CB4854	RID16ind	11746
1571769	218	10	CB4854	RID16ind	11873
1571813	527	4	CB4854	RID16ind	11917
1571837	639	2	CB4854	RID16ind	11941
1571848	3156	75	CB4854	RID16ind	11952
1571886	1346	30	CB4854	RID16ind	11990
1571889	1736	40	CB4854	RID16ind	11993
1571946	368	1	CB4854	RID16ind	12050
1572350	1370	6	CB4854	RID16ind	12454
1572377	195	0	CB4854	RID16ind	12481
1572475	1570	95	CB4854	RID16ind	12579
1572509	426	0	CB4854	RID16ind	12613
1572602	646	8	CB4854	RID16ind	12706
1572701	314	2	CB4854	RID16ind	12805
1572717	7600	143	CB4854	RID16ind	12821
1572731	679	17	CB4854	RID16ind	12835
1572773	297	1	CB4854	RID16ind	12877
1583314	554	10	CB4854	RID16ind	23418
1586234	1244	20	CB4854	RID16ind	26338
1586871	0	0	CB4854	RID16ind	26975
1586880	212	1	CB4854	RID16ind	26984
1586982	714	24	CB4854	RID16ind	27086
1591455	818	14	CB4854	RID16ind	31559
1591470	1168	14	CB4854	RID16ind	31574
1591516	20	0	CB4854	RID16ind	31620
1591871	2163	9	CB4854	RID16ind	31975
1595029	1053	4	CB4854	RID16ind	35133
1595234	808	0	CB4854	RID16ind	35338
1595245	3762	20	CB4854	RID16ind	35349
1595521	694	4	CB4854	RID16ind	35625
1595568	2917	14	CB4854	RID16ind	35672
1595583	2696	54	CB4854	RID16ind	35687
1595613	958	14	CB4854	RID16ind	35717
1595625	716	22	CB4854	RID16ind	35729
1595669	200	0	CB4854	RID16ind	35773
1599034	700	12	CB4854	RID16ind	39138
1599217	1870	16	CB4854	RID16ind	39321
1600270	1534	32	CB4854	RID16ind	40374
1600367	443	0	CB4854	RID16ind	40471
1601122	1215	8	CB4854	RID16ind	41226
1601123	1163	12	CB4854	RID16ind	41227
1601130	690	24	CB4854	RID16ind	41234
1601369	304	0	CB4854	RID16ind	41473
1601839	992	12	CB4854	RID16ind	41943
1601958	756	54	CB4854	RID16ind	42062
1601975	279	8	CB4854	RID16ind	42079
1601988	347	7	CB4854	RID16ind	42092
1602160	1153	37	CB4854	RID16ind	42264
1602456	134	6	CB4854	RID16ind	42560
1602489	201	4	CB4854	RID16ind	42593
1602497	1985	8	CB4854	RID16ind	42601
1602513	490	18	CB4854	RID16ind	42617
1602517	406	1	CB4854	RID16ind	42621
1602717	7600	44	CB4854	RID16ind	42821
1606585	194	2	CB4854	RID16ind	46689
1606589	760	16	CB4854	RID16ind	46693
1616167	430	0	CB4854	RID16ind	56271
1616326	395	6	CB4854	RID16ind	56430
1616724	877	13	CB4854	RID16ind	56828
1616963	930	36	CB4854	RID16ind	57067
1616982	714	24	CB4854	RID16ind	57086
1621105	1006	8	CB4854	RID16ind	61209
1621153	458	20	CB4854	RID16ind	61257
1621541	1374	0	CB4854	RID16ind	61645
1621563	905	6	CB4854	RID16ind	61667
1621860	1056	36	CB4854	RID16ind	61964
1625033	566	34	CB4854	RID16ind	65137
1625344	519	3	CB4854	RID16ind	65448
1625526	642	12	CB4854	RID16ind	65630
1625530	656	28	CB4854	RID16ind	65634
1625565	2899	0	CB4854	RID16ind	65669
1625615	816	24	CB4854	RID16ind	65719
1625660	1136	4	CB4854	RID16ind	65764
1625786	1090	8	CB4854	RID16ind	65890
1625828	125	0	CB4854	RID16ind	65932
1629327	945	24	CB4854	RID16ind	69431
1629806	3039	27	CB4854	RID16ind	69910
1629821	1008	42	CB4854	RID16ind	69925
1630017	2150	0	CB4854	RID16ind	70121
1630876	1376	10	CB4854	RID16ind	70980
1630891	588	2	CB4854	RID16ind	70995
1631315	807	8	CB4854	RID16ind	71419
1631496	259	0	CB4854	RID16ind	71600
1631629	620	12	CB4854	RID16ind	71733
1631988	453	1	CB4854	RID16ind	72092
1632016	607	15	CB4854	RID16ind	72120
1632399	972	0	CB4854	RID16ind	72503
1632406	604	6	CB4854	RID16ind	72510
1632739	1068	14	CB4854	RID16ind	72843
1636564	2589	36	CB4854	RID16ind	76668
1646052	2108	24	CB4854	RID16ind	86156
1646169	342	8	CB4854	RID16ind	86273
1646225	371	3	CB4854	RID16ind	86329
1651464	758	0	CB4854	RID16ind	91568
1651742	214	6	CB4854	RID16ind	91846
1651753	560	10	CB4854	RID16ind	91857
1651820	990	26	CB4854	RID16ind	91924
1655159	330	1	CB4854	RID16ind	95263
1655186	2168	42	CB4854	RID16ind	95290
1655200	242	0	CB4854	RID16ind	95304
1655455	239	0	CB4854	RID16ind	95559
1655521	236	7	CB4854	RID16ind	95625
1655526	655	32	CB4854	RID16ind	95630
1655532	1464	4	CB4854	RID16ind	95636
1655656	1163	4	CB4854	RID16ind	95760
1655770	433	1	CB4854	RID16ind	95874
1655848	187	6	CB4854	RID16ind	95952
1655880	476	4	CB4854	RID16ind	95984
1658834	742	3	CB4854	RID16ind	98938
1658868	565	12	CB4854	RID16ind	98972
1659319	645	0	CB4854	RID16ind	99423
1659359	1169	27	CB4854	RID16ind	99463
1659514	402	0	CB4854	RID16ind	99618
1659805	3033	27	CB4854	RID16ind	99909
1659809	3033	27	CB4854	RID16ind	99913
1660229	282	0	CB4854	RID16ind	100333
1660306	148	0	CB4854	RID16ind	100410
1660307	148	0	CB4854	RID16ind	100411
1660326	100	0	CB4854	RID16ind	100430
1661120	1161	12	CB4854	RID16ind	101224
1661122	1484	156	CB4854	RID16ind	101226
1661123	1484	156	CB4854	RID16ind	101227
1661124	1484	156	CB4854	RID16ind	101228
1661671	421	6	CB4854	RID16ind	101775
1661906	1148	24	CB4854	RID16ind	102010
1661990	365	14	CB4854	RID16ind	102094
1661997	144	13	CB4854	RID16ind	102101
1662022	457	15	CB4854	RID16ind	102126
1662339	326	6	CB4854	RID16ind	102443
1662412	545	15	CB4854	RID16ind	102516
1662414	381	1	CB4854	RID16ind	102518
1662430	404	0	CB4854	RID16ind	102534
1662486	456	2	CB4854	RID16ind	102590
1662691	433	13	CB4854	RID16ind	102795
1662868	570	14	CB4854	RID16ind	102972
1662869	322	10	CB4854	RID16ind	102973
1664596	1480	32	CB4854	RID16ind	104700
1666397	377	7	CB4854	RID16ind	106501
1666580	194	0	CB4854	RID16ind	106684
1666591	530	25	CB4854	RID16ind	106695
1666600	552	2	CB4854	RID16ind	106704
1666827	1129	18	CB4854	RID16ind	106931
1674566	1467	27	CB4854	RID16ind	114670
1675179	378	5	CB4854	RID16ind	115283
1675764	208	4	CB4854	RID16ind	115868
1676137	822	9	CB4854	RID16ind	116241
1676231	788	12	CB4854	RID16ind	116335
1676343	1918	14	CB4854	RID16ind	116447
1676430	504	8	CB4854	RID16ind	116534
1676562	2288	18	CB4854	RID16ind	116666
1676745	1109	21	CB4854	RID16ind	116849
1676826	2	0	CB4854	RID16ind	116930
1676933	2438	20	CB4854	RID16ind	117037
1677062	237	0	CB4854	RID16ind	117166
1680885	1262	5	CB4854	RID21ind	997
1681100	1222	2	CB4854	RID21ind	1212
1681125	584	2	CB4854	RID21ind	1237
1681148	624	0	CB4854	RID21ind	1260
1681450	792	10	CB4854	RID21ind	1562
1681905	3504	12	CB4854	RID21ind	2017
1683567	470	0	CB4854	RID21ind	3679
1685047	1349	16	CB4854	RID21ind	5159
1685151	674	28	CB4854	RID21ind	5263
1685253	741	1	CB4854	RID21ind	5365
1685513	1418	8	CB4854	RID21ind	5625
1685559	4442	24	CB4854	RID21ind	5671
1685613	1068	0	CB4854	RID21ind	5725
1685684	293	0	CB4854	RID21ind	5796
1685755	2394	0	CB4854	RID21ind	5867
1688971	3010	23	CB4854	RID21ind	9083
1689051	0	0	CB4854	RID21ind	9163
1689212	2065	24	CB4854	RID21ind	9324
1689904	634	0	CB4854	RID21ind	10016
1690156	299	0	CB4854	RID21ind	10268
1690292	3511	0	CB4854	RID21ind	10404
1690301	334	8	CB4854	RID21ind	10413
1690672	1971	6	CB4854	RID21ind	10784
1690775	1026	4	CB4854	RID21ind	10887
1691115	1342	0	CB4854	RID21ind	11227
1691119	1248	12	CB4854	RID21ind	11231
1691166	277	10	CB4854	RID21ind	11278
1691597	692	0	CB4854	RID21ind	11709
1691634	728	8	CB4854	RID21ind	11746
1691761	327	5	CB4854	RID21ind	11873
1691805	871	5	CB4854	RID21ind	11917
1691829	852	1	CB4854	RID21ind	11941
[truncated: 83,996 more rows]

## Sheet: TraitData_GWAS
strain	RADseq_TraitValue
AB1	-0.00108956
AB4	-0.000735581
CB4851	-1.28279e-05
CB4852	-9.76726e-05
CB4853	-0.000104916
CB4854	-0.000834588
CB4856	-0.000926858
CB4857	-0.000486995
CB4858	-0.000279677
CB4932	8.24621e-05
CX11262	-0.000776708
CX11264	-0.00102306
CX11271	-0.000285448
CX11285	-0.000454118
CX11292	0.000365799
CX11307	-0.000483986
CX11314	-0.000528437
CX11315	0.00111057
DL200	0.005747
DL226	-0.000764146
DL238	-0.000804199
ED3005	0.00139496
ED3011	-0.000241451
ED3012	-0.000347688
ED3017	0.002837
ED3040	-2.54153e-05
ED3046	-0.000153265
ED3048	0.000259088
ED3049	-0.000428888
ED3052	0.00285457
ED3073	-0.000480596
ED3077	0.0158527
EG4347	0.000265527
EG4349	0.000949259
EG4724	-0.000240064
EG4725	0.000711111
EG4946	-0.00118965
JT11398	-0.000251866
JU1088	-0.000542719
JU1172	-0.000573628
JU1200	0.000643843
JU1212	-0.000501071
JU1213	0.00010362
JU1242	-0.000508404
JU1246	-0.000352744
JU1395	-0.000812441
JU1400	-9.71602e-05
JU1409	-0.000496307
JU1440	-0.00046671
JU1491	-0.00018339
JU1530	-0.000394825
JU1568	-9.76493e-06
JU1580	0.000636567
JU1581	-0.00117858
JU1586	-0.000505315
JU1652	0.00459811
JU1896	0.0014952
JU258	-0.000978538
JU310	-0.000783759
JU311	-0.000460506
JU323	-0.000451522
JU346	-0.000320575
JU360	-0.000889179
JU363	0.000173825
JU367	-0.000317346
JU393	-0.00097683
JU394	8.55359e-05
JU397	-1.13891e-05
JU406	7.69507e-05
JU440	-0.000588908
JU561	-0.000947311
JU642	-0.000175764
JU751	-0.000343356
JU774	0.000156211
JU775	-0.00013356
JU778	-0.000466356
JU782	-0.000251516
JU792	-0.000126172
JU830	-0.000421824
JU847	0.000694595
KR314	-0.000739883
LKC34	0.000101218
LSJ1	0.000228846
MY1	-0.000355746
MY10	-0.000267622
MY16	-0.00108497
MY18	0.000116325
MY23	-0.000536114
PB303	-0.00161896
PB306	-0.000679825
PS2025	-0.00247968
PX174	-0.000170046
PX179	-0.000586876
QX1211	-0.000186515
QX1233	-0.000967571
WN2002	-0.000671692

## Sheet: GWAS_interval_summary
biotype	gene_count	genes_w_variants	genes_w_MODIFIER_variants	genes_w_LOW_variants	genes_w_MODERATE_variants	genes_w_HIGH_variants	variants	interval
protein_coding	145	145	140	132	127	39	12550	III:86993-925945
pseudogene	7	9	9	6	0	1	357	III:86993-925945
lincRNA	2	17	17	2	0	2	129	III:86993-925945
snoRNA	5	2	2	0	0	0	3	III:86993-925945
ncRNA	25	0	0	0	0	0	0	III:86993-925945
piRNA	5	0	0	0	0	0	0	III:86993-925945
tRNA	1	0	0	0	0	0	0	III:86993-925945
transposon_protein_coding	2	0	0	0	0	0	0	III:86993-925945

## Sheet: GWAS_interval_variants_unfilter
CHROM	POS	REF	ALT	allele_set	aaf	call_rate	is_snp	is_indel	is_transition	nucl_diversity	num_called	num_het	num_hom_alt	num_hom_ref	ANN
III	86993	T	['C']	{'T', 'C'}	0.0531915	1	TRUE	FALSE	TRUE	0.101263	94	0	5	89	[['C', 'missense_variant', 'MODERATE', 'F54C4.4', 'WBGene00018795', 'transcript', 'F54C4.4', 'protein_coding', '2/3', 'c.199A>G', 'p.Ser67Gly', '321/585', '199/360', '67/119', '', '']]
III	87012	C	['A']	{'A', 'C'}	0.0638298	1	TRUE	FALSE	FALSE	0.12015	94	0	6	88	[['A', 'synonymous_variant', 'LOW', 'F54C4.4', 'WBGene00018795', 'transcript', 'F54C4.4', 'protein_coding', '2/3', 'c.180G>T', 'p.Ser60Ser', '302/585', '180/360', '60/119', '', '']]
III	87018	G	['A']	{'A', 'G'}	0.0638298	1	TRUE	FALSE	TRUE	0.12015	94	0	6	88	[['A', 'synonymous_variant', 'LOW', 'F54C4.4', 'WBGene00018795', 'transcript', 'F54C4.4', 'protein_coding', '2/3', 'c.174C>T', 'p.Ala58Ala', '296/585', '174/360', '58/119', '', '']]
III	87071	G	['C']	{'G', 'C'}	0.0638298	1	TRUE	FALSE	FALSE	0.12015	94	0	6	88	[['C', 'missense_variant', 'MODERATE', 'F54C4.4', 'WBGene00018795', 'transcript', 'F54C4.4', 'protein_coding', '2/3', 'c.121C>G', 'p.Pro41Ala', '243/585', '121/360', '41/119', '', '']]
III	87083	C	['A']	{'A', 'C'}	0.0638298	1	TRUE	FALSE	FALSE	0.12015	94	0	6	88	[['A', 'missense_variant', 'MODERATE', 'F54C4.4', 'WBGene00018795', 'transcript', 'F54C4.4', 'protein_coding', '2/3', 'c.109G>T', 'p.Ala37Ser', '231/585', '109/360', '37/119', '', '']]
III	87143	GA	['GAA', 'G']	{'GAA', 'GA', 'G'}	0.048913	0.978723	FALSE	TRUE	FALSE	0.0935495	92	1	4	87	[['G', 'intron_variant', 'MODIFIER', 'F54C4.4', 'WBGene00018795', 'transcript', 'F54C4.4', 'protein_coding', '1/2', 'c.74-26delT', '', '', '', '', '', ''], ['GAA', 'intron_variant', 'MODIFIER', 'F54C4.4', 'WBGene00018795', 'transcript', 'F54C4.4', 'protein_coding', '1/2', 'c.74-27_74-26insT', '', '', '', '', '', '']]
III	87173	G	['A']	{'A', 'G'}	0.0537634	0.989362	TRUE	FALSE	TRUE	0.102296	93	0	5	88	[['A', 'intron_variant', 'MODIFIER', 'F54C4.4', 'WBGene00018795', 'transcript', 'F54C4.4', 'protein_coding', '1/2', 'c.73+14C>T', '', '', '', '', '', '']]
III	87212	C	['T']	{'T', 'C'}	0.0638298	1	TRUE	FALSE	TRUE	0.12015	94	0	6	88	[['T', 'synonymous_variant', 'LOW', 'F54C4.4', 'WBGene00018795', 'transcript', 'F54C4.4', 'protein_coding', '1/3', 'c.48G>A', 'p.Gln16Gln', '170/585', '48/360', '16/119', '', '']]
III	87227	CATG	['C']	{'CATG', 'C'}	0.0638298	1	FALSE	TRUE	FALSE	0.12015	94	0	6	88	[['C', 'disruptive_inframe_deletion', 'MODERATE', 'F54C4.4', 'WBGene00018795', 'transcript', 'F54C4.4', 'protein_coding', '1/3', 'c.30_32delCAT', 'p.Met11del', '154/585', '30/360', '10/119', '', '']]
III	87245	G	['A']	{'A', 'G'}	0.0531915	1	TRUE	FALSE	TRUE	0.101263	94	0	5	89	[['A', 'synonymous_variant', 'LOW', 'F54C4.4', 'WBGene00018795', 'transcript', 'F54C4.4', 'protein_coding', '1/3', 'c.15C>T', 'p.Phe5Phe', '137/585', '15/360', '5/119', '', '']]
III	87254	T	['C']	{'T', 'C'}	0.0531915	1	TRUE	FALSE	TRUE	0.101263	94	0	5	89	[['C', 'synonymous_variant', 'LOW', 'F54C4.4', 'WBGene00018795', 'transcript', 'F54C4.4', 'protein_coding', '1/3', 'c.6A>G', 'p.Glu2Glu', '128/585', '6/360', '2/119', '', '']]
III	87261	G	['C']	{'G', 'C'}	0.0531915	1	TRUE	FALSE	FALSE	0.101263	94	0	5	89	[['C', '5_prime_UTR_variant', 'MODIFIER', 'F54C4.4', 'WBGene00018795', 'transcript', 'F54C4.4', 'protein_coding', '1/3', 'c.-2C>G', '', '', '', '', '2', '']]
III	87264	T	['G']	{'T', 'G'}	0.0531915	1	TRUE	FALSE	FALSE	0.101263	94	0	5	89	[['G', '5_prime_UTR_variant', 'MODIFIER', 'F54C4.4', 'WBGene00018795', 'transcript', 'F54C4.4', 'protein_coding', '1/3', 'c.-5A>C', '', '', '', '', '5', '']]
III	87269	G	['A']	{'A', 'G'}	0.117021	1	TRUE	FALSE	TRUE	0.20776	94	0	11	83	[['A', '5_prime_UTR_variant', 'MODIFIER', 'F54C4.4', 'WBGene00018795', 'transcript', 'F54C4.4', 'protein_coding', '1/3', 'c.-10C>T', '', '', '', '', '10', '']]
III	87285	T	['A']	{'T', 'A'}	0.0638298	1	TRUE	FALSE	FALSE	0.12015	94	0	6	88	[['A', '5_prime_UTR_variant', 'MODIFIER', 'F54C4.4', 'WBGene00018795', 'transcript', 'F54C4.4', 'protein_coding', '1/3', 'c.-26A>T', '', '', '', '', '26', '']]
III	87289	A	['T']	{'T', 'A'}	0.148936	1	TRUE	FALSE	FALSE	0.254864	94	0	14	80	[['T', '5_prime_UTR_variant', 'MODIFIER', 'F54C4.4', 'WBGene00018795', 'transcript', 'F54C4.4', 'protein_coding', '1/3', 'c.-30T>A', '', '', '', '', '30', '']]
III	87291	T	['C']	{'T', 'C'}	0.0638298	1	TRUE	FALSE	TRUE	0.12015	94	0	6	88	[['C', '5_prime_UTR_variant', 'MODIFIER', 'F54C4.4', 'WBGene00018795', 'transcript', 'F54C4.4', 'protein_coding', '1/3', 'c.-32A>G', '', '', '', '', '32', '']]
III	87293	A	['G']	{'A', 'G'}	0.117021	1	TRUE	FALSE	TRUE	0.20776	94	0	11	83	[['G', '5_prime_UTR_variant', 'MODIFIER', 'F54C4.4', 'WBGene00018795', 'transcript', 'F54C4.4', 'protein_coding', '1/3', 'c.-34T>C', '', '', '', '', '34', '']]
III	87300	G	['T']	{'T', 'G'}	0.0638298	1	TRUE	FALSE	FALSE	0.12015	94	0	6	88	[['T', '5_prime_UTR_variant', 'MODIFIER', 'F54C4.4', 'WBGene00018795', 'transcript', 'F54C4.4', 'protein_coding', '1/3', 'c.-41C>A', '', '', '', '', '41', '']]
III	87303	A	['G']	{'A', 'G'}	0.117021	1	TRUE	FALSE	TRUE	0.20776	94	0	11	83	[['G', '5_prime_UTR_variant', 'MODIFIER', 'F54C4.4', 'WBGene00018795', 'transcript', 'F54C4.4', 'protein_coding', '1/3', 'c.-44T>C', '', '', '', '', '44', '']]
III	87315	G	['C']	{'G', 'C'}	0.0531915	1	TRUE	FALSE	FALSE	0.101263	94	0	5	89	[['C', '5_prime_UTR_variant', 'MODIFIER', 'F54C4.4', 'WBGene00018795', 'transcript', 'F54C4.4', 'protein_coding', '1/3', 'c.-56C>G', '', '', '', '', '56', '']]
III	87362	G	['A']	{'A', 'G'}	0.0638298	1	TRUE	FALSE	TRUE	0.12015	94	0	6	88	[['A', '5_prime_UTR_variant', 'MODIFIER', 'F54C4.4', 'WBGene00018795', 'transcript', 'F54C4.4', 'protein_coding', '1/3', 'c.-103C>T', '', '', '', '', '103', '']]
III	87388	A	['T']	{'T', 'A'}	0.0106383	1	TRUE	FALSE	FALSE	0.0211628	94	0	1	93
III	87391	G	['C']	{'G', 'C'}	0.0638298	1	TRUE	FALSE	FALSE	0.12015	94	0	6	88
III	87403	T	['C']	{'T', 'C'}	0.0674157	0.946809	TRUE	FALSE	TRUE	0.126452	89	0	6	83
III	87403	T	['TG']	{'TG', 'T'}	0.0568182	0.93617	FALSE	TRUE	FALSE	0.107792	88	0	5	83
III	87405	G	['A']	{'A', 'G'}	0.0638298	1	TRUE	FALSE	TRUE	0.12015	94	0	6	88
III	87445	T	['C']	{'T', 'C'}	0.0212766	1	TRUE	FALSE	TRUE	0.0418705	94	0	2	92
III	87478	G	['T']	{'T', 'G'}	0.0561798	0.946809	TRUE	FALSE	FALSE	0.106646	89	0	5	84
III	87480	T	['A']	{'T', 'A'}	0.0561798	0.946809	TRUE	FALSE	FALSE	0.106646	89	0	5	84
III	87487	G	['GC']	{'GC', 'G'}	0.0393258	0.946809	FALSE	TRUE	FALSE	0.0759855	89	1	3	85
III	87495	G	['T']	{'T', 'G'}	0.0561798	0.946809	TRUE	FALSE	FALSE	0.106646	89	0	5	84
III	87548	A	['G']	{'A', 'G'}	0.0638298	1	TRUE	FALSE	TRUE	0.12015	94	0	6	88
III	87554	TC	['T']	{'T', 'TC'}	0.0319149	1	FALSE	TRUE	FALSE	0.0621231	94	0	3	91
III	87555	C	['T']	{'T', 'C'}	0.0860215	0.989362	TRUE	FALSE	TRUE	0.158094	93	0	8	85
III	87559	G	['T']	{'T', 'G'}	0.0638298	1	TRUE	FALSE	FALSE	0.12015	94	0	6	88	[['T', '5_prime_UTR_variant', 'MODIFIER', 'mrpl-40', 'WBGene00018793', 'transcript', 'F54C4.1', 'protein_coding', '1/5', 'c.-5G>T', '', '', '', '', '5', '']]
III	87572	C	['T']	{'T', 'C'}	0.0319149	1	TRUE	FALSE	TRUE	0.0621231	94	0	3	91	[['T', 'synonymous_variant', 'LOW', 'mrpl-40', 'WBGene00018793', 'transcript', 'F54C4.1', 'protein_coding', '1/5', 'c.9C>T', 'p.Ser3Ser', '14/666', '9/570', '3/189', '', '']]
III	87632	A	['G']	{'A', 'G'}	0.0638298	1	TRUE	FALSE	TRUE	0.12015	94	0	6	88	[['G', 'synonymous_variant', 'LOW', 'mrpl-40', 'WBGene00018793', 'transcript', 'F54C4.1', 'protein_coding', '1/5', 'c.69A>G', 'p.Thr23Thr', '74/666', '69/570', '23/189', '', '']]
III	87641	C	['T']	{'T', 'C'}	0.0638298	1	TRUE	FALSE	TRUE	0.12015	94	0	6	88	[['T', 'synonymous_variant', 'LOW', 'mrpl-40', 'WBGene00018793', 'transcript', 'F54C4.1', 'protein_coding', '1/5', 'c.78C>T', 'p.Ala26Ala', '83/666', '78/570', '26/189', '', '']]
III	87692	G	['T']	{'T', 'G'}	0.0319149	1	TRUE	FALSE	FALSE	0.0621231	94	0	3	91	[['T', 'splice_region_variant&intron_variant', 'LOW', 'mrpl-40', 'WBGene00018793', 'transcript', 'F54C4.1', 'protein_coding', '1/4', 'c.123+6G>T', '', '', '', '', '', '']]
III	87699	A	['G']	{'A', 'G'}	0.0638298	1	TRUE	FALSE	TRUE	0.12015	94	0	6	88	[['G', 'intron_variant', 'MODIFIER', 'mrpl-40', 'WBGene00018793', 'transcript', 'F54C4.1', 'protein_coding', '1/4', 'c.123+13A>G', '', '', '', '', '', '']]
III	87702	G	['A']	{'A', 'G'}	0.0638298	1	TRUE	FALSE	TRUE	0.12015	94	0	6	88	[['A', 'intron_variant', 'MODIFIER', 'mrpl-40', 'WBGene00018793', 'transcript', 'F54C4.1', 'protein_coding', '1/4', 'c.123+16G>A', '', '', '', '', '', '']]
III	87708	C	['T']	{'T', 'C'}	0.0425532	1	TRUE	FALSE	TRUE	0.0819206	94	0	4	90	[['T', 'intron_variant', 'MODIFIER', 'mrpl-40', 'WBGene00018793', 'transcript', 'F54C4.1', 'protein_coding', '1/4', 'c.123+22C>T', '', '', '', '', '', '']]
III	87724	A	['G']	{'A', 'G'}	0.0638298	1	TRUE	FALSE	TRUE	0.12015	94	0	6	88	[['G', 'intron_variant', 'MODIFIER', 'mrpl-40', 'WBGene00018793', 'transcript', 'F54C4.1', 'protein_coding', '1/4', 'c.123+38A>G', '', '', '', '', '', '']]
III	87758	T	['A']	{'T', 'A'}	0.0319149	1	TRUE	FALSE	FALSE	0.0621231	94	0	3	91	[['A', 'splice_region_variant&intron_variant', 'LOW', 'mrpl-40', 'WBGene00018793', 'transcript', 'F54C4.1', 'protein_coding', '1/4', 'c.124-7T>A', '', '', '', '', '', '']]
III	87770	A	['G']	{'A', 'G'}	0.0638298	1	TRUE	FALSE	TRUE	0.12015	94	0	6	88	[['G', 'synonymous_variant', 'LOW', 'mrpl-40', 'WBGene00018793', 'transcript', 'F54C4.1', 'protein_coding', '2/5', 'c.129A>G', 'p.Ala43Ala', '134/666', '129/570', '43/189', '', '']]
III	87788	A	['G']	{'A', 'G'}	0.0638298	1	TRUE	FALSE	TRUE	0.12015	94	0	6	88	[['G', 'synonymous_variant', 'LOW', 'mrpl-40', 'WBGene00018793', 'transcript', 'F54C4.1', 'protein_coding', '2/5', 'c.147A>G', 'p.Arg49Arg', '152/666', '147/570', '49/189', '', '']]
III	87818	T	['C']	{'T', 'C'}	0.0638298	1	TRUE	FALSE	TRUE	0.12015	94	0	6	88	[['C', 'synonymous_variant', 'LOW', 'mrpl-40', 'WBGene00018793', 'transcript', 'F54C4.1', 'protein_coding', '2/5', 'c.177T>C', 'p.Arg59Arg', '182/666', '177/570', '59/189', '', '']]
III	87857	T	['C']	{'T', 'C'}	0.0638298	1	TRUE	FALSE	TRUE	0.12015	94	0	6	88	[['C', 'synonymous_variant', 'LOW', 'mrpl-40', 'WBGene00018793', 'transcript', 'F54C4.1', 'protein_coding', '2/5', 'c.216T>C', 'p.Asp72Asp', '221/666', '216/570', '72/189', '', '']]
III	87911	T	['C']	{'T', 'C'}	0.0638298	1	TRUE	FALSE	TRUE	0.12015	94	0	6	88	[['C', 'intron_variant', 'MODIFIER', 'mrpl-40', 'WBGene00018793', 'transcript', 'F54C4.1', 'protein_coding', '2/4', 'c.254+16T>C', '', '', '', '', '', '']]
III	87912	C	['T']	{'T', 'C'}	0.0638298	1	TRUE	FALSE	TRUE	0.12015	94	0	6	88	[['T', 'intron_variant', 'MODIFIER', 'mrpl-40', 'WBGene00018793', 'transcript', 'F54C4.1', 'protein_coding', '2/4', 'c.254+17C>T', '', '', '', '', '', '']]
III	87913	T	['G']	{'T', 'G'}	0.117021	1	TRUE	FALSE	FALSE	0.20776	94	0	11	83	[['G', 'intron_variant', 'MODIFIER', 'mrpl-40', 'WBGene00018793', 'transcript', 'F54C4.1', 'protein_coding', '2/4', 'c.254+18T>G', '', '', '', '', '', '']]
III	87932	C	['T']	{'T', 'C'}	0.117021	1	TRUE	FALSE	TRUE	0.20776	94	0	11	83	[['T', 'splice_region_variant&intron_variant', 'LOW', 'mrpl-40', 'WBGene00018793', 'transcript', 'F54C4.1', 'protein_coding', '2/4', 'c.255-7C>T', '', '', '', '', '', '']]
III	87935	A	['G', 'T']	{'A', 'G'}	0.0638298	1	TRUE	FALSE	FALSE	0.12015	94	0	6	88	[['G', 'splice_region_variant&intron_variant', 'LOW', 'mrpl-40', 'WBGene00018793', 'transcript', 'F54C4.1', 'protein_coding', '2/4', 'c.255-4A>G', '', '', '', '', '', ''], ['T', 'splice_region_variant&intron_variant', 'LOW', 'mrpl-40', 'WBGene00018793', 'transcript', 'F54C4.1', 'protein_coding', '2/4', 'c.255-4A>T', '', '', '', '', '', '']]
III	87945	C	['G']	{'G', 'C'}	0.0638298	1	TRUE	FALSE	FALSE	0.12015	94	0	6	88	[['G', 'synonymous_variant', 'LOW', 'mrpl-40', 'WBGene00018793', 'transcript', 'F54C4.1', 'protein_coding', '3/5', 'c.261C>G', 'p.Arg87Arg', '266/666', '261/570', '87/189', '', '']]
III	87956	G	['C']	{'G', 'C'}	0.0638298	1	TRUE	FALSE	FALSE	0.12015	94	0	6	88	[['C', 'missense_variant', 'MODERATE', 'mrpl-40', 'WBGene00018793', 'transcript', 'F54C4.1', 'protein_coding', '3/5', 'c.272G>C', 'p.Arg91Pro', '277/666', '272/570', '91/189', '', '']]
III	87966	C	['A']	{'A', 'C'}	0.0638298	1	TRUE	FALSE	FALSE	0.12015	94	0	6	88	[['A', 'synonymous_variant', 'LOW', 'mrpl-40', 'WBGene00018793', 'transcript', 'F54C4.1', 'protein_coding', '3/5', 'c.282C>A', 'p.Leu94Leu', '287/666', '282/570', '94/189', '', '']]
III	87969	C	['T']	{'T', 'C'}	0.159574	1	TRUE	FALSE	TRUE	0.269655	94	0	15	79	[['T', 'synonymous_variant', 'LOW', 'mrpl-40', 'WBGene00018793', 'transcript', 'F54C4.1', 'protein_coding', '3/5', 'c.285C>T', 'p.Thr95Thr', '290/666', '285/570', '95/189', '', '']]
III	87993	C	['A']	{'A', 'C'}	0.0638298	1	TRUE	FALSE	FALSE	0.12015	94	0	6	88	[['A', 'synonymous_variant', 'LOW', 'mrpl-40', 'WBGene00018793', 'transcript', 'F54C4.1', 'protein_coding', '3/5', 'c.309C>A', 'p.Ala103Ala', '314/666', '309/570', '103/189', '', '']]
III	88002	G	['T']	{'T', 'G'}	0.0638298	1	TRUE	FALSE	FALSE	0.12015	94	0	6	88	[['T', 'synonymous_variant', 'LOW', 'mrpl-40', 'WBGene00018793', 'transcript', 'F54C4.1', 'protein_coding', '3/5', 'c.318G>T', 'p.Leu106Leu', '323/666', '318/570', '106/189', '', '']]
III	88009	A	['G']	{'A', 'G'}	0.0638298	1	TRUE	FALSE	TRUE	0.12015	94	0	6	88	[['G', 'splice_region_variant&intron_variant', 'LOW', 'mrpl-40', 'WBGene00018793', 'transcript', 'F54C4.1', 'protein_coding', '3/4', 'c.321+4A>G', '', '', '', '', '', '']]
III	88015	T	['TG']	{'TG', 'T'}	0.0549451	0.968085	FALSE	TRUE	FALSE	0.104426	91	0	5	86	[['TG', 'intron_variant', 'MODIFIER', 'mrpl-40', 'WBGene00018793', 'transcript', 'F54C4.1', 'protein_coding', '3/4', 'c.321+10_321+11insG', '', '', '', '', '', '']]
III	88028	T	['G']	{'T', 'G'}	0.0434783	0.978723	TRUE	FALSE	FALSE	0.0836303	92	0	4	88	[['G', 'intron_variant', 'MODIFIER', 'mrpl-40', 'WBGene00018793', 'transcript', 'F54C4.1', 'protein_coding', '3/4', 'c.322-20T>G', '', '', '', '', '', '']]
III	88029	C	['A']	{'A', 'C'}	0.0434783	0.978723	TRUE	FALSE	FALSE	0.0836303	92	0	4	88	[['A', 'intron_variant', 'MODIFIER', 'mrpl-40', 'WBGene00018793', 'transcript', 'F54C4.1', 'protein_coding', '3/4', 'c.322-19C>A', '', '', '', '', '', '']]
III	88056	A	['G']	{'A', 'G'}	0.0638298	1	TRUE	FALSE	TRUE	0.12015	94	0	6	88	[['G', 'synonymous_variant', 'LOW', 'mrpl-40', 'WBGene00018793', 'transcript', 'F54C4.1', 'protein_coding', '4/5', 'c.330A>G', 'p.Thr110Thr', '335/666', '330/570', '110/189', '', '']]
III	88074	G	['A']	{'A', 'G'}	0.0638298	1	TRUE	FALSE	TRUE	0.12015	94	0	6	88	[['A', 'synonymous_variant', 'LOW', 'mrpl-40', 'WBGene00018793', 'transcript', 'F54C4.1', 'protein_coding', '4/5', 'c.348G>A', 'p.Leu116Leu', '353/666', '348/570', '116/189', '', '']]
III	88080	G	['A']	{'A', 'G'}	0.0638298	1	TRUE	FALSE	TRUE	0.12015	94	0	6	88	[['A', 'synonymous_variant', 'LOW', 'mrpl-40', 'WBGene00018793', 'transcript', 'F54C4.1', 'protein_coding', '4/5', 'c.354G>A', 'p.Gln118Gln', '359/666', '354/570', '118/189', '', '']]
III	88086	T	['C']	{'T', 'C'}	0.0638298	1	TRUE	FALSE	TRUE	0.12015	94	0	6	88	[['C', 'synonymous_variant', 'LOW', 'mrpl-40', 'WBGene00018793', 'transcript', 'F54C4.1', 'protein_coding', '4/5', 'c.360T>C', 'p.Asp120Asp', '365/666', '360/570', '120/189', '', '']]
III	88152	A	['T']	{'T', 'A'}	0.117021	1	TRUE	FALSE	FALSE	0.20776	94	0	11	83	[['T', 'missense_variant', 'MODERATE', 'mrpl-40', 'WBGene00018793', 'transcript', 'F54C4.1', 'protein_coding', '4/5', 'c.426A>T', 'p.Lys142Asn', '431/666', '426/570', '142/189', '', '']]
III	88182	A	['C']	{'A', 'C'}	0.0638298	1	TRUE	FALSE	FALSE	0.12015	94	0	6	88	[['C', 'synonymous_variant', 'LOW', 'mrpl-40', 'WBGene00018793', 'transcript', 'F54C4.1', 'protein_coding', '4/5', 'c.456A>C', 'p.Pro152Pro', '461/666', '456/570', '152/189', '', '']]
III	88191	G	['C']	{'G', 'C'}	0.0531915	1	TRUE	FALSE	FALSE	0.101263	94	0	5	89	[['C', 'missense_variant', 'MODERATE', 'mrpl-40', 'WBGene00018793', 'transcript', 'F54C4.1', 'protein_coding', '4/5', 'c.465G>C', 'p.Lys155Asn', '470/666', '465/570', '155/189', '', '']]
III	88228	A	['G']	{'A', 'G'}	0.0555556	0.957447	TRUE	FALSE	TRUE	0.105525	90	0	5	85	[['G', 'intron_variant', 'MODIFIER', 'mrpl-40', 'WBGene00018793', 'transcript', 'F54C4.1', 'protein_coding', '4/4', 'c.486+16A>G', '', '', '', '', '', '']]
III	88257	A	['T']	{'T', 'A'}	0.0568182	0.93617	TRUE	FALSE	FALSE	0.107792	88	0	5	83	[['T', 'intron_variant', 'MODIFIER', 'mrpl-40', 'WBGene00018793', 'transcript', 'F54C4.1', 'protein_coding', '4/4', 'c.486+45A>T', '', '', '', '', '', '']]
III	88295	A	['G']	{'A', 'G'}	0.0689655	0.925532	TRUE	FALSE	TRUE	0.129161	87	0	6	81	[['G', 'intron_variant', 'MODIFIER', 'mrpl-40', 'WBGene00018793', 'transcript', 'F54C4.1', 'protein_coding', '4/4', 'c.486+83A>G', '', '', '', '', '', '']]
III	88473	C	['G']	{'G', 'C'}	0.0581395	0.914894	TRUE	FALSE	FALSE	0.110159	86	0	5	81	[['G', 'intron_variant', 'MODIFIER', 'mrpl-40', 'WBGene00018793', 'transcript', 'F54C4.1', 'protein_coding', '4/4', 'c.486+261C>G', '', '', '', '', '', '']]
III	88512	C	['T', 'A']	{'T', 'A', 'C'}	0.0274725	0.968085	TRUE	FALSE	FALSE	0.0537308	91	1	2	88	[['A', 'intron_variant', 'MODIFIER', 'mrpl-40', 'WBGene00018793', 'transcript', 'F54C4.1', 'protein_coding', '4/4', 'c.486+300C>A', '', '', '', '', '', ''], ['T', 'intron_variant', 'MODIFIER', 'mrpl-40', 'WBGene00018793', 'transcript', 'F54C4.1', 'protein_coding', '4/4', 'c.486+300C>T', '', '', '', '', '', '']]
III	88522	GAAAAAATTCACT	['G']	{'GAAAAAATTCACT', 'G'}	0.103261	0.978723	FALSE	TRUE	FALSE	0.186208	92	1	9	82	[['G', 'intron_variant', 'MODIFIER', 'mrpl-40', 'WBGene00018793', 'transcript', 'F54C4.1', 'protein_coding', '4/4', 'c.486+311_486+322delAAAAAATTCACT', '', '', '', '', '', '']]
III	88528	A	['T']	{'T', 'A'}	0.0549451	0.968085	TRUE	FALSE	FALSE	0.104426	91	0	5	86	[['T', 'intron_variant', 'MODIFIER', 'mrpl-40', 'WBGene00018793', 'transcript', 'F54C4.1', 'protein_coding', '4/4', 'c.486+316A>T', '', '', '', '', '', '']]
III	88529	T	['A']	{'T', 'A'}	0.0549451	0.968085	TRUE	FALSE	FALSE	0.104426	91	0	5	86	[['A', 'intron_variant', 'MODIFIER', 'mrpl-40', 'WBGene00018793', 'transcript', 'F54C4.1', 'protein_coding', '4/4', 'c.486+317T>A', '', '', '', '', '', '']]
III	88534	T	['A']	{'T', 'A'}	0.0432099	0.861702	TRUE	FALSE	FALSE	0.0831991	81	1	3	77	[['A', 'intron_variant', 'MODIFIER', 'mrpl-40', 'WBGene00018793', 'transcript', 'F54C4.1', 'protein_coding', '4/4', 'c.486+322T>A', '', '', '', '', '', '']]
III	88547	T	['A']	{'T', 'A'}	0.0934066	0.968085	TRUE	FALSE	FALSE	0.170299	91	1	8	82	[['A', 'intron_variant', 'MODIFIER', 'mrpl-40', 'WBGene00018793', 'transcript', 'F54C4.1', 'protein_coding', '4/4', 'c.486+335T>A', '', '', '', '', '', '']]
III	88555	G	['A']	{'A', 'G'}	0.0833333	0.957447	TRUE	FALSE	TRUE	0.153631	90	1	7	82	[['A', 'intron_variant', 'MODIFIER', 'mrpl-40', 'WBGene00018793', 'transcript', 'F54C4.1', 'protein_coding', '4/4', 'c.486+343G>A', '', '', '', '', '', '']]
III	88609	G	['A']	{'A', 'G'}	0.0652174	0.978723	TRUE	FALSE	TRUE	0.122594	92	0	6	86	[['A', 'intron_variant', 'MODIFIER', 'mrpl-40', 'WBGene00018793', 'transcript', 'F54C4.1', 'protein_coding', '4/4', 'c.486+397G>A', '', '', '', '', '', '']]
III	88618	G	['T']	{'T', 'G'}	0.0652174	0.978723	TRUE	FALSE	FALSE	0.122594	92	0	6	86	[['T', 'intron_variant', 'MODIFIER', 'mrpl-40', 'WBGene00018793', 'transcript', 'F54C4.1', 'protein_coding', '4/4', 'c.486+406G>T', '', '', '', '', '', '']]
III	88626	G	['A']	{'A', 'G'}	0.0652174	0.978723	TRUE	FALSE	TRUE	0.122594	92	0	6	86	[['A', 'intron_variant', 'MODIFIER', 'mrpl-40', 'WBGene00018793', 'transcript', 'F54C4.1', 'protein_coding', '4/4', 'c.486+414G>A', '', '', '', '', '', '']]
III	88716	C	['G']	{'G', 'C'}	0.0537634	0.989362	TRUE	FALSE	FALSE	0.102296	93	0	5	88	[['G', 'intron_variant', 'MODIFIER', 'mrpl-40', 'WBGene00018793', 'transcript', 'F54C4.1', 'protein_coding', '4/4', 'c.487-353C>G', '', '', '', '', '', '']]
III	88717	C	['A']	{'A', 'C'}	0.0537634	0.989362	TRUE	FALSE	FALSE	0.102296	93	0	5	88	[['A', 'intron_variant', 'MODIFIER', 'mrpl-40', 'WBGene00018793', 'transcript', 'F54C4.1', 'protein_coding', '4/4', 'c.487-352C>A', '', '', '', '', '', '']]
III	88734	C	['CAA']	{'CAA', 'C'}	0.0215054	0.989362	FALSE	TRUE	FALSE	0.0423133	93	2	1	90	[['CAA', 'intron_variant', 'MODIFIER', 'mrpl-40', 'WBGene00018793', 'transcript', 'F54C4.1', 'protein_coding', '4/4', 'c.487-335_487-334insAA', '', '', '', '', '', '']]
III	88761	A	['G']	{'A', 'G'}	0.0543478	0.978723	TRUE	FALSE	TRUE	0.10335	92	0	5	87	[['G', 'intron_variant', 'MODIFIER', 'mrpl-40', 'WBGene00018793', 'transcript', 'F54C4.1', 'protein_coding', '4/4', 'c.487-308A>G', '', '', '', '', '', '']]
III	88762	T	['A']	{'T', 'A'}	0.0652174	0.978723	TRUE	FALSE	FALSE	0.122594	92	0	6	86	[['A', 'intron_variant', 'MODIFIER', 'mrpl-40', 'WBGene00018793', 'transcript', 'F54C4.1', 'protein_coding', '4/4', 'c.487-307T>A', '', '', '', '', '', '']]
III	88833	A	['G']	{'A', 'G'}	0.0224719	0.946809	TRUE	FALSE	TRUE	0.0441821	89	0	2	87	[['G', 'intron_variant', 'MODIFIER', 'mrpl-40', 'WBGene00018793', 'transcript', 'F54C4.1', 'protein_coding', '4/4', 'c.487-236A>G', '', '', '', '', '', '']]
III	88858	C	['T']	{'T', 'C'}	0.0326087	0.978723	TRUE	FALSE	TRUE	0.0634355	92	0	3	89	[['T', 'intron_variant', 'MODIFIER', 'mrpl-40', 'WBGene00018793', 'transcript', 'F54C4.1', 'protein_coding', '4/4', 'c.487-211C>T', '', '', '', '', '', '']]
III	88869	A	['T']	{'T', 'A'}	0.0217391	0.978723	TRUE	FALSE	FALSE	0.0427655	92	0	2	90	[['T', 'intron_variant', 'MODIFIER', 'mrpl-40', 'WBGene00018793', 'transcript', 'F54C4.1', 'protein_coding', '4/4', 'c.487-200A>T', '', '', '', '', '', '']]
III	88908	C	['A']	{'A', 'C'}	0.0322581	0.989362	TRUE	FALSE	FALSE	0.0627724	93	0	3	90	[['A', 'intron_variant', 'MODIFIER', 'mrpl-40', 'WBGene00018793', 'transcript', 'F54C4.1', 'protein_coding', '4/4', 'c.487-161C>A', '', '', '', '', '', '']]
III	88927	T	['C']	{'T', 'C'}	0.0108696	0.978723	TRUE	FALSE	TRUE	0.0216203	92	0	1	91	[['C', 'intron_variant', 'MODIFIER', 'mrpl-40', 'WBGene00018793', 'transcript', 'F54C4.1', 'protein_coding', '4/4', 'c.487-142T>C', '', '', '', '', '', '']]
III	88980	A	['T']	{'T', 'A'}	0.0879121	0.968085	TRUE	FALSE	FALSE	0.161253	91	0	8	83	[['T', 'intron_variant', 'MODIFIER', 'mrpl-40', 'WBGene00018793', 'transcript', 'F54C4.1', 'protein_coding', '4/4', 'c.487-89A>T', '', '', '', '', '', '']]
III	88986	T	['A']	{'T', 'A'}	0.0604396	0.968085	TRUE	FALSE	FALSE	0.114201	91	1	5	85	[['A', 'intron_variant', 'MODIFIER', 'mrpl-40', 'WBGene00018793', 'transcript', 'F54C4.1', 'protein_coding', '4/4', 'c.487-83T>A', '', '', '', '', '', '']]
III	88988	T	['A']	{'T', 'A'}	0.0604396	0.968085	TRUE	FALSE	FALSE	0.114201	91	1	5	85	[['A', 'intron_variant', 'MODIFIER', 'mrpl-40', 'WBGene00018793', 'transcript', 'F54C4.1', 'protein_coding', '4/4', 'c.487-81T>A', '', '', '', '', '', '']]
III	88989	T	['C']	{'T', 'C'}	0.0549451	0.968085	TRUE	FALSE	TRUE	0.104426	91	0	5	86	[['C', 'intron_variant', 'MODIFIER', 'mrpl-40', 'WBGene00018793', 'transcript', 'F54C4.1', 'protein_coding', '4/4', 'c.487-80T>C', '', '', '', '', '', '']]
III	88990	T	['A']	{'T', 'A'}	0.0604396	0.968085	TRUE	FALSE	FALSE	0.114201	91	1	5	85	[['A', 'intron_variant', 'MODIFIER', 'mrpl-40', 'WBGene00018793', 'transcript', 'F54C4.1', 'protein_coding', '4/4', 'c.487-79T>A', '', '', '', '', '', '']]
III	88991	T	['A']	{'T', 'A'}	0.0549451	0.968085	TRUE	FALSE	FALSE	0.104426	91	0	5	86	[['A', 'intron_variant', 'MODIFIER', 'mrpl-40', 'WBGene00018793', 'transcript', 'F54C4.1', 'protein_coding', '4/4', 'c.487-78T>A', '', '', '', '', '', '']]
III	88992	T	['A']	{'T', 'A'}	0.164835	0.968085	TRUE	FALSE	FALSE	0.27685	91	0	15	76	[['A', 'intron_variant', 'MODIFIER', 'mrpl-40', 'WBGene00018793', 'transcript', 'F54C4.1', 'protein_coding', '4/4', 'c.487-77T>A', '', '', '', '', '', '']]
III	88993	A	['T']	{'T', 'A'}	0.021978	0.968085	TRUE	FALSE	FALSE	0.0432275	91	0	2	89	[['T', 'intron_variant', 'MODIFIER', 'mrpl-40', 'WBGene00018793', 'transcript', 'F54C4.1', 'protein_coding', '4/4', 'c.487-76A>T', '', '', '', '', '', '']]
III	89011	CA	['C']	{'CA', 'C'}	0.0107527	0.989362	FALSE	TRUE	FALSE	0.0213891	93	0	1	92	[['C', 'intron_variant', 'MODIFIER', 'mrpl-40', 'WBGene00018793', 'transcript', 'F54C4.1', 'protein_coding', '4/4', 'c.487-57delA', '', '', '', '', '', '']]
III	89048	A	['T']	{'T', 'A'}	0.0215054	0.989362	TRUE	FALSE	FALSE	0.0423133	93	0	2	91	[['T', 'intron_variant', 'MODIFIER', 'mrpl-40', 'WBGene00018793', 'transcript', 'F54C4.1', 'protein_coding', '4/4', 'c.487-21A>T', '', '', '', '', '', '']]
III	89054	T	['A', 'C']	{'T', 'A', 'C'}	0.0537634	0.989362	TRUE	FALSE	FALSE	0.102296	93	0	5	88	[['A', 'intron_variant', 'MODIFIER', 'mrpl-40', 'WBGene00018793', 'transcript', 'F54C4.1', 'protein_coding', '4/4', 'c.487-15T>A', '', '', '', '', '', ''], ['C', 'intron_variant', 'MODIFIER', 'mrpl-40', 'WBGene00018793', 'transcript', 'F54C4.1', 'protein_coding', '4/4', 'c.487-15T>C', '', '', '', '', '', '']]
III	89092	T	['C']	{'T', 'C'}	0.0638298	1	TRUE	FALSE	TRUE	0.12015	94	0	6	88	[['C', 'synonymous_variant', 'LOW', 'mrpl-40', 'WBGene00018793', 'transcript', 'F54C4.1', 'protein_coding', '5/5', 'c.510T>C', 'p.Ile170Ile', '515/666', '510/570', '170/189', '', '']]
III	89110	G	['C']	{'G', 'C'}	0.0638298	1	TRUE	FALSE	FALSE	0.12015	94	0	6	88	[['C', 'synonymous_variant', 'LOW', 'mrpl-40', 'WBGene00018793', 'transcript', 'F54C4.1', 'protein_coding', '5/5', 'c.528G>C', 'p.Pro176Pro', '533/666', '528/570', '176/189', '', '']]
III	89157	G	['C']	{'G', 'C'}	0.0638298	1	TRUE	FALSE	FALSE	0.12015	94	0	6	88	[['C', '3_prime_UTR_variant', 'MODIFIER', 'mrpl-40', 'WBGene00018793', 'transcript', 'F54C4.1', 'protein_coding', '5/5', 'c.*5G>C', '', '', '', '', '5', '']]
III	89158	A	['G']	{'A', 'G'}	0.0638298	1	TRUE	FALSE	TRUE	0.12015	94	0	6	88	[['G', '3_prime_UTR_variant', 'MODIFIER', 'mrpl-40', 'WBGene00018793', 'transcript', 'F54C4.1', 'protein_coding', '5/5', 'c.*6A>G', '', '', '', '', '6', '']]
III	89207	G	['T']	{'T', 'G'}	0.0638298	1	TRUE	FALSE	FALSE	0.12015	94	0	6	88	[['T', '3_prime_UTR_variant', 'MODIFIER', 'mrpl-40', 'WBGene00018793', 'transcript', 'F54C4.1', 'protein_coding', '5/5', 'c.*55G>T', '', '', '', '', '55', '']]
III	89218	AC	['A']	{'A', 'AC'}	0.0842697	0.946809	FALSE	TRUE	FALSE	0.155209	89	3	6	80	[['A', '3_prime_UTR_variant', 'MODIFIER', 'mrpl-40', 'WBGene00018793', 'transcript', 'F54C4.1', 'protein_coding', '5/5', 'c.*67delC', '', '', '', '', '67', '']]
III	89223	T	['G']	{'T', 'G'}	0.0638298	1	TRUE	FALSE	FALSE	0.12015	94	0	6	88	[['G', '3_prime_UTR_variant', 'MODIFIER', 'mrpl-40', 'WBGene00018793', 'transcript', 'F54C4.1', 'protein_coding', '5/5', 'c.*71T>G', '', '', '', '', '71', '']]
III	89247	A	['T', 'C']	{'T', 'A'}	0.0638298	1	TRUE	FALSE	FALSE	0.12015	94	0	6	88
III	89250	GA	['GAA', 'G']	{'GAA', 'GA', 'G'}	0.0434783	0.978723	FALSE	TRUE	FALSE	0.0836303	92	0	4	88
III	89258	T	['A']	{'T', 'A'}	0.0531915	1	TRUE	FALSE	FALSE	0.101263	94	0	5	89
III	89259	A	['G']	{'A', 'G'}	0.0638298	1	TRUE	FALSE	TRUE	0.12015	94	0	6	88
III	89290	T	['A', 'G']	{'T', 'A', 'G'}	0.0957447	1	TRUE	FALSE	FALSE	0.174081	94	0	9	85
III	89293	A	['G']	{'A', 'G'}	0.0319149	1	TRUE	FALSE	TRUE	0.0621231	94	0	3	91
III	89348	G	['A']	{'A', 'G'}	0.0638298	1	TRUE	FALSE	TRUE	0.12015	94	0	6	88
III	89351	A	['G']	{'A', 'G'}	0.0638298	1	TRUE	FALSE	TRUE	0.12015	94	0	6	88
III	89353	T	['A']	{'T', 'A'}	0.0638298	1	TRUE	FALSE	FALSE	0.12015	94	0	6	88
III	89360	C	['T']	{'T', 'C'}	0.0744681	1	TRUE	FALSE	TRUE	0.138582	94	0	7	87
III	89361	A	['G']	{'A', 'G'}	0.0638298	1	TRUE	FALSE	TRUE	0.12015	94	0	6	88
III	89381	T	['G']	{'T', 'G'}	0.0537634	0.989362	TRUE	FALSE	FALSE	0.102296	93	0	5	88
III	89392	A	['G']	{'A', 'G'}	0.0537634	0.989362	TRUE	FALSE	TRUE	0.102296	93	0	5	88
III	89409	C	['T']	{'T', 'C'}	0.0537634	0.989362	TRUE	FALSE	TRUE	0.102296	93	0	5	88
III	89416	C	['A']	{'A', 'C'}	0.0537634	0.989362	TRUE	FALSE	FALSE	0.102296	93	0	5	88
III	89454	C	['G']	{'G', 'C'}	0.0531915	1	TRUE	FALSE	FALSE	0.101263	94	0	5	89	[['G', 'splice_region_variant', 'LOW', 'pat-4', 'WBGene00003931', 'transcript', 'C29F9.7', 'protein_coding', '8/8', 'c.*189G>C', '', '', '', '', '', ''], ['G', '3_prime_UTR_variant', 'MODIFIER', 'pat-4', 'WBGene00003931', 'transcript', 'C29F9.7', 'protein_coding', '8/8', 'c.*189G>C', '', '', '', '', '189', '']]
III	89478	T	['TTTCA']	{'TTTCA', 'T'}	0.0319149	1	FALSE	TRUE	FALSE	0.0621231	94	0	3	91	[['TTTCA', '3_prime_UTR_variant', 'MODIFIER', 'pat-4', 'WBGene00003931', 'transcript', 'C29F9.7', 'protein_coding', '8/8', 'c.*161_*164dupTGAA', '', '', '', '', '164', '']]
III	89482	A	['ATTCG']	{'ATTCG', 'A'}	0.0106383	1	FALSE	TRUE	FALSE	0.0211628	94	0	1	93	[['ATTCG', '3_prime_UTR_variant', 'MODIFIER', 'pat-4', 'WBGene00003931', 'transcript', 'C29F9.7', 'protein_coding', '8/8', 'c.*160_*161insCGAA', '', '', '', '', '160', '']]
III	89486	A	['C']	{'A', 'C'}	0.0212766	1	TRUE	FALSE	FALSE	0.0418705	94	0	2	92	[['C', '3_prime_UTR_variant', 'MODIFIER', 'pat-4', 'WBGene00003931', 'transcript', 'C29F9.7', 'protein_coding', '8/8', 'c.*157T>G', '', '', '', '', '157', '']]
III	89492	C	['A']	{'A', 'C'}	0.0638298	1	TRUE	FALSE	FALSE	0.12015	94	0	6	88	[['A', '3_prime_UTR_variant', 'MODIFIER', 'pat-4', 'WBGene00003931', 'transcript', 'C29F9.7', 'protein_coding', '8/8', 'c.*151G>T', '', '', '', '', '151', '']]
III	89506	A	['G']	{'A', 'G'}	0.0638298	1	TRUE	FALSE	TRUE	0.12015	94	0	6	88	[['G', '3_prime_UTR_variant', 'MODIFIER', 'pat-4', 'WBGene00003931', 'transcript', 'C29F9.7', 'protein_coding', '8/8', 'c.*137T>C', '', '', '', '', '137', '']]
III	89513	C	['A', 'T']	{'A', 'C'}	0.0638298	1	TRUE	FALSE	FALSE	0.12015	94	0	6	88	[['A', '3_prime_UTR_variant', 'MODIFIER', 'pat-4', 'WBGene00003931', 'transcript', 'C29F9.7', 'protein_coding', '8/8', 'c.*130G>T', '', '', '', '', '130', ''], ['T', '3_prime_UTR_variant', 'MODIFIER', 'pat-4', 'WBGene00003931', 'transcript', 'C29F9.7', 'protein_coding', '8/8', 'c.*130G>A', '', '', '', '', '130', '']]
III	89526	T	['C']	{'T', 'C'}	0.0638298	1	TRUE	FALSE	TRUE	0.12015	94	0	6	88	[['C', '3_prime_UTR_variant', 'MODIFIER', 'pat-4', 'WBGene00003931', 'transcript', 'C29F9.7', 'protein_coding', '8/8', 'c.*117A>G', '', '', '', '', '117', '']]
III	89531	A	['T']	{'T', 'A'}	0.0638298	1	TRUE	FALSE	FALSE	0.12015	94	0	6	88	[['T', '3_prime_UTR_variant', 'MODIFIER', 'pat-4', 'WBGene00003931', 'transcript', 'C29F9.7', 'protein_coding', '8/8', 'c.*112T>A', '', '', '', '', '112', '']]
III	89532	G	['C', 'A']	{'G', 'C'}	0.0638298	1	TRUE	FALSE	FALSE	0.12015	94	0	6	88	[['A', '3_prime_UTR_variant', 'MODIFIER', 'pat-4', 'WBGene00003931', 'transcript', 'C29F9.7', 'protein_coding', '8/8', 'c.*111C>T', '', '', '', '', '111', ''], ['C', '3_prime_UTR_variant', 'MODIFIER', 'pat-4', 'WBGene00003931', 'transcript', 'C29F9.7', 'protein_coding', '8/8', 'c.*111C>G', '', '', '', '', '111', '']]
III	89573	T	['TG']	{'TG', 'T'}	0.0638298	1	FALSE	TRUE	FALSE	0.12015	94	0	6	88	[['TG', '3_prime_UTR_variant', 'MODIFIER', 'pat-4', 'WBGene00003931', 'transcript', 'C29F9.7', 'protein_coding', '8/8', 'c.*69dupC', '', '', '', '', '69', '']]
III	89601	T	['A']	{'T', 'A'}	0.0113636	0.93617	TRUE	FALSE	FALSE	0.0225974	88	0	1	87	[['A', '3_prime_UTR_variant', 'MODIFIER', 'pat-4', 'WBGene00003931', 'transcript', 'C29F9.7', 'protein_coding', '8/8', 'c.*42A>T', '', '', '', '', '42', '']]
III	89602	A	['T']	{'T', 'A'}	0.0212766	1	TRUE	FALSE	FALSE	0.0418705	94	0	2	92	[['T', '3_prime_UTR_variant', 'MODIFIER', 'pat-4', 'WBGene00003931', 'transcript', 'C29F9.7', 'protein_coding', '8/8', 'c.*41T>A', '', '', '', '', '41', '']]
III	89611	G	['T']	{'T', 'G'}	0.0638298	1	TRUE	FALSE	FALSE	0.12015	94	0	6	88	[['T', '3_prime_UTR_variant', 'MODIFIER', 'pat-4', 'WBGene00003931', 'transcript', 'C29F9.7', 'protein_coding', '8/8', 'c.*32C>A', '', '', '', '', '32', '']]
III	89615	A	['G']	{'A', 'G'}	0.0638298	1	TRUE	FALSE	TRUE	0.12015	94	0	6	88	[['G', '3_prime_UTR_variant', 'MODIFIER', 'pat-4', 'WBGene00003931', 'transcript', 'C29F9.7', 'protein_coding', '8/8', 'c.*28T>C', '', '', '', '', '28', '']]
III	89619	C	['A']	{'A', 'C'}	0.117021	1	TRUE	FALSE	FALSE	0.20776	94	0	11	83	[['A', '3_prime_UTR_variant', 'MODIFIER', 'pat-4', 'WBGene00003931', 'transcript', 'C29F9.7', 'protein_coding', '8/8', 'c.*24G>T', '', '', '', '', '24', '']]
III	89630	C	['T']	{'T', 'C'}	0.0561798	0.946809	TRUE	FALSE	TRUE	0.106646	89	0	5	84	[['T', '3_prime_UTR_variant', 'MODIFIER', 'pat-4', 'WBGene00003931', 'transcript', 'C29F9.7', 'protein_coding', '8/8', 'c.*13G>A', '', '', '', '', '13', '']]
III	89637	G	['A']	{'A', 'G'}	0.0638298	1	TRUE	FALSE	TRUE	0.12015	94	0	6	88	[['A', '3_prime_UTR_variant', 'MODIFIER', 'pat-4', 'WBGene00003931', 'transcript', 'C29F9.7', 'protein_coding', '8/8', 'c.*6C>T', '', '', '', '', '6', '']]
III	89649	T	['C']	{'T', 'C'}	0.0638298	1	TRUE	FALSE	TRUE	0.12015	94	0	6	88	[['C', 'missense_variant', 'MODERATE', 'pat-4', 'WBGene00003931', 'transcript', 'C29F9.7', 'protein_coding', '8/8', 'c.1395A>G', 'p.Ile465Met', '1401/1597', '1395/1401', '465/466', '', '']]
III	89650	A	['G']	{'A', 'G'}	0.117021	1	TRUE	FALSE	TRUE	0.20776	94	0	11	83	[['G', 'missense_variant', 'MODERATE', 'pat-4', 'WBGene00003931', 'transcript', 'C29F9.7', 'protein_coding', '8/8', 'c.1394T>C', 'p.Ile465Thr', '1400/1597', '1394/1401', '465/466', '', '']]
III	89661	T	['C']	{'T', 'C'}	0.0638298	1	TRUE	FALSE	TRUE	0.12015	94	0	6	88	[['C', 'synonymous_variant', 'LOW', 'pat-4', 'WBGene00003931', 'transcript', 'C29F9.7', 'protein_coding', '8/8', 'c.1383A>G', 'p.Leu461Leu', '1389/1597', '1383/1401', '461/466', '', '']]
III	89694	A	['G']	{'A', 'G'}	0.0638298	1	TRUE	FALSE	TRUE	0.12015	94	0	6	88	[['G', 'synonymous_variant', 'LOW', 'pat-4', 'WBGene00003931', 'transcript', 'C29F9.7', 'protein_coding', '8/8', 'c.1350T>C', 'p.Arg450Arg', '1356/1597', '1350/1401', '450/466', '', '']]
III	89721	G	['A']	{'A', 'G'}	0.0638298	1	TRUE	FALSE	TRUE	0.12015	94	0	6	88	[['A', 'synonymous_variant', 'LOW', 'pat-4', 'WBGene00003931', 'transcript', 'C29F9.7', 'protein_coding', '8/8', 'c.1323C>T', 'p.Asn441Asn', '1329/1597', '1323/1401', '441/466', '', '']]
III	89739	A	['G']	{'A', 'G'}	0.0638298	1	TRUE	FALSE	TRUE	0.12015	94	0	6	88	[['G', 'synonymous_variant', 'LOW', 'pat-4', 'WBGene00003931', 'transcript', 'C29F9.7', 'protein_coding', '8/8', 'c.1305T>C', 'p.Asn435Asn', '1311/1597', '1305/1401', '435/466', '', '']]
III	89742	A	['T']	{'T', 'A'}	0.0531915	1	TRUE	FALSE	FALSE	0.101263	94	0	5	89	[['T', 'synonymous_variant', 'LOW', 'pat-4', 'WBGene00003931', 'transcript', 'C29F9.7', 'protein_coding', '8/8', 'c.1302T>A', 'p.Arg434Arg', '1308/1597', '1302/1401', '434/466', '', '']]
III	89743	C	['T']	{'T', 'C'}	0.0531915	1	TRUE	FALSE	TRUE	0.101263	94	0	5	89	[['T', 'missense_variant', 'MODERATE', 'pat-4', 'WBGene00003931', 'transcript', 'C29F9.7', 'protein_coding', '8/8', 'c.1301G>A', 'p.Arg434His', '1307/1597', '1301/1401', '434/466', '', '']]
III	89744	G	['T']	{'T', 'G'}	0.0531915	1	TRUE	FALSE	FALSE	0.101263	94	0	5	89	[['T', 'missense_variant', 'MODERATE', 'pat-4', 'WBGene00003931', 'transcript', 'C29F9.7', 'protein_coding', '8/8', 'c.1300C>A', 'p.Arg434Ser', '1306/1597', '1300/1401', '434/466', '', '']]
III	89745	G	['T', 'A']	{'T', 'G'}	0.0531915	1	TRUE	FALSE	FALSE	0.101263	94	0	5	89	[['A', 'synonymous_variant', 'LOW', 'pat-4', 'WBGene00003931', 'transcript', 'C29F9.7', 'protein_coding', '8/8', 'c.1299C>T', 'p.Ala433Ala', '1305/1597', '1299/1401', '433/466', '', ''], ['T', 'synonymous_variant', 'LOW', 'pat-4', 'WBGene00003931', 'transcript', 'C29F9.7', 'protein_coding', '8/8', 'c.1299C>A', 'p.Ala433Ala', '1305/1597', '1299/1401', '433/466', '', '']]
III	89754	A	['G']	{'A', 'G'}	0.0638298	1	TRUE	FALSE	TRUE	0.12015	94	0	6	88	[['G', 'synonymous_variant', 'LOW', 'pat-4', 'WBGene00003931', 'transcript', 'C29F9.7', 'protein_coding', '8/8', 'c.1290T>C', 'p.Pro430Pro', '1296/1597', '1290/1401', '430/466', '', '']]
III	89757	G	['C', 'T']	{'T', 'G', 'C'}	0.117021	1	TRUE	FALSE	FALSE	0.20776	94	0	11	83	[['C', 'synonymous_variant', 'LOW', 'pat-4', 'WBGene00003931', 'transcript', 'C29F9.7', 'protein_coding', '8/8', 'c.1287C>G', 'p.Pro429Pro', '1293/1597', '1287/1401', '429/466', '', ''], ['T', 'synonymous_variant', 'LOW', 'pat-4', 'WBGene00003931', 'transcript', 'C29F9.7', 'protein_coding', '8/8', 'c.1287C>A', 'p.Pro429Pro', '1293/1597', '1287/1401', '429/466', '', '']]
III	89760	A	['G']	{'A', 'G'}	0.0638298	1	TRUE	FALSE	TRUE	0.12015	94	0	6	88	[['G', 'synonymous_variant', 'LOW', 'pat-4', 'WBGene00003931', 'transcript', 'C29F9.7', 'protein_coding', '8/8', 'c.1284T>C', 'p.Ile428Ile', '1290/1597', '1284/1401', '428/466', '', '']]
III	89763	G	['T']	{'T', 'G'}	0.159574	1	TRUE	FALSE	FALSE	0.269655	94	0	15	79	[['T', 'missense_variant', 'MODERATE', 'pat-4', 'WBGene00003931', 'transcript', 'C29F9.7', 'protein_coding', '8/8', 'c.1281C>A', 'p.His427Gln', '1287/1597', '1281/1401', '427/466', '', '']]
III	89784	A	['G']	{'A', 'G'}	0.0531915	1	TRUE	FALSE	TRUE	0.101263	94	0	5	89	[['G', 'synonymous_variant', 'LOW', 'pat-4', 'WBGene00003931', 'transcript', 'C29F9.7', 'protein_coding', '8/8', 'c.1260T>C', 'p.Ala420Ala', '1266/1597', '1260/1401', '420/466', '', '']]
III	89796	T	['A']	{'T', 'A'}	0.0638298	1	TRUE	FALSE	FALSE	0.12015	94	0	6	88	[['A', 'splice_region_variant&intron_variant', 'LOW', 'pat-4', 'WBGene00003931', 'transcript', 'C29F9.7', 'protein_coding', '7/7', 'c.1255-7A>T', '', '', '', '', '', '']]
III	89798	A	['G']	{'A', 'G'}	0.0638298	1	TRUE	FALSE	TRUE	0.12015	94	0	6	88	[['G', 'intron_variant', 'MODIFIER', 'pat-4', 'WBGene00003931', 'transcript', 'C29F9.7', 'protein_coding', '7/7', 'c.1255-9T>C', '', '', '', '', '', '']]
III	89799	A	['G']	{'A', 'G'}	0.0638298	1	TRUE	FALSE	TRUE	0.12015	94	0	6	88	[['G', 'intron_variant', 'MODIFIER', 'pat-4', 'WBGene00003931', 'transcript', 'C29F9.7', 'protein_coding', '7/7', 'c.1255-10T>C', '', '', '', '', '', '']]
III	89800	T	['G']	{'T', 'G'}	0.117021	1	TRUE	FALSE	FALSE	0.20776	94	0	11	83	[['G', 'intron_variant', 'MODIFIER', 'pat-4', 'WBGene00003931', 'transcript', 'C29F9.7', 'protein_coding', '7/7', 'c.1255-11A>C', '', '', '', '', '', '']]
III	89835	A	['G']	{'A', 'G'}	0.0638298	1	TRUE	FALSE	TRUE	0.12015	94	0	6	88	[['G', 'intron_variant', 'MODIFIER', 'pat-4', 'WBGene00003931', 'transcript', 'C29F9.7', 'protein_coding', '7/7', 'c.1255-46T>C', '', '', '', '', '', '']]
III	89840	G	['A']	{'A', 'G'}	0.0638298	1	TRUE	FALSE	TRUE	0.12015	94	0	6	88	[['A', 'intron_variant', 'MODIFIER', 'pat-4', 'WBGene00003931', 'transcript', 'C29F9.7', 'protein_coding', '7/7', 'c.1255-51C>T', '', '', '', '', '', '']]
III	89850	G	['C', 'A']	{'G', 'C'}	0.0638298	1	TRUE	FALSE	FALSE	0.12015	94	0	6	88	[['A', 'intron_variant', 'MODIFIER', 'pat-4', 'WBGene00003931', 'transcript', 'C29F9.7', 'protein_coding', '7/7', 'c.1255-61C>T', '', '', '', '', '', ''], ['C', 'intron_variant', 'MODIFIER', 'pat-4', 'WBGene00003931', 'transcript', 'C29F9.7', 'protein_coding', '7/7', 'c.1255-61C>G', '', '', '', '', '', '']]
III	89854	A	['G', 'T']	{'T', 'A', 'G'}	0.0851064	1	TRUE	FALSE	FALSE	0.156559	94	0	8	86	[['G', 'intron_variant', 'MODIFIER', 'pat-4', 'WBGene00003931', 'transcript', 'C29F9.7', 'protein_coding', '7/7', 'c.1255-65T>C', '', '', '', '', '', ''], ['T', 'intron_variant', 'MODIFIER', 'pat-4', 'WBGene00003931', 'transcript', 'C29F9.7', 'protein_coding', '7/7', 'c.1255-65T>A', '', '', '', '', '', '']]
III	89855	A	['T']	{'T', 'A'}	0.0212766	1	TRUE	FALSE	FALSE	0.0418705	94	0	2	92	[['T', 'intron_variant', 'MODIFIER', 'pat-4', 'WBGene00003931', 'transcript', 'C29F9.7', 'protein_coding', '7/7', 'c.1255-66T>A', '', '', '', '', '', '']]
III	89856	G	['A']	{'A', 'G'}	0.0212766	1	TRUE	FALSE	TRUE	0.0418705	94	0	2	92	[['A', 'intron_variant', 'MODIFIER', 'pat-4', 'WBGene00003931', 'transcript', 'C29F9.7', 'protein_coding', '7/7', 'c.1255-67C>T', '', '', '', '', '', '']]
III	89867	A	['G']	{'A', 'G'}	0.0638298	1	TRUE	FALSE	TRUE	0.12015	94	0	6	88	[['G', 'intron_variant', 'MODIFIER', 'pat-4', 'WBGene00003931', 'transcript', 'C29F9.7', 'protein_coding', '7/7', 'c.1255-78T>C', '', '', '', '', '', '']]
III	89888	T	['C']	{'T', 'C'}	0.0638298	1	TRUE	FALSE	TRUE	0.12015	94	0	6	88	[['C', 'intron_variant', 'MODIFIER', 'pat-4', 'WBGene00003931', 'transcript', 'C29F9.7', 'protein_coding', '7/7', 'c.1255-99A>G', '', '', '', '', '', '']]
III	89901	G	['A']	{'A', 'G'}	0.117021	1	TRUE	FALSE	TRUE	0.20776	94	0	11	83	[['A', 'intron_variant', 'MODIFIER', 'pat-4', 'WBGene00003931', 'transcript', 'C29F9.7', 'protein_coding', '7/7', 'c.1255-112C>T', '', '', '', '', '', '']]
III	89903	C	['A']	{'A', 'C'}	0.0638298	1	TRUE	FALSE	FALSE	0.12015	94	0	6	88	[['A', 'intron_variant', 'MODIFIER', 'pat-4', 'WBGene00003931', 'transcript', 'C29F9.7', 'protein_coding', '7/7', 'c.1255-114G>T', '', '', '', '', '', '']]
III	89918	T	['C']	{'T', 'C'}	0.117021	1	TRUE	FALSE	TRUE	0.20776	94	0	11	83	[['C', 'intron_variant', 'MODIFIER', 'pat-4', 'WBGene00003931', 'transcript', 'C29F9.7', 'protein_coding', '7/7', 'c.1255-129A>G', '', '', '', '', '', '']]
III	89944	G	['T']	{'T', 'G'}	0.0851064	1	TRUE	FALSE	FALSE	0.156559	94	0	8	86	[['T', 'intron_variant', 'MODIFIER', 'pat-4', 'WBGene00003931', 'transcript', 'C29F9.7', 'protein_coding', '7/7', 'c.1255-155C>A', '', '', '', '', '', '']]
III	89990	T	['C']	{'T', 'C'}	0.0106383	1	TRUE	FALSE	TRUE	0.0211628	94	0	1	93	[['C', 'intron_variant', 'MODIFIER', 'pat-4', 'WBGene00003931', 'transcript', 'C29F9.7', 'protein_coding', '7/7', 'c.1255-201A>G', '', '', '', '', '', '']]
III	90045	A	['T']	{'T', 'A'}	0.0212766	1	TRUE	FALSE	FALSE	0.0418705	94	0	2	92	[['T', 'intron_variant', 'MODIFIER', 'pat-4', 'WBGene00003931', 'transcript', 'C29F9.7', 'protein_coding', '7/7', 'c.1255-256T>A', '', '', '', '', '', '']]
III	90061	A	['C']	{'A', 'C'}	0.0212766	1	TRUE	FALSE	FALSE	0.0418705	94	0	2	92	[['C', 'intron_variant', 'MODIFIER', 'pat-4', 'WBGene00003931', 'transcript', 'C29F9.7', 'protein_coding', '7/7', 'c.1255-272T>G', '', '', '', '', '', '']]
III	90066	G	['T']	{'T', 'G'}	0.0638298	1	TRUE	FALSE	FALSE	0.12015	94	0	6	88	[['T', 'intron_variant', 'MODIFIER', 'pat-4', 'WBGene00003931', 'transcript', 'C29F9.7', 'protein_coding', '7/7', 'c.1255-277C>A', '', '', '', '', '', '']]
III	90072	A	['C']	{'A', 'C'}	0.0638298	1	TRUE	FALSE	FALSE	0.12015	94	0	6	88	[['C', 'intron_variant', 'MODIFIER', 'pat-4', 'WBGene00003931', 'transcript', 'C29F9.7', 'protein_coding', '7/7', 'c.1255-283T>G', '', '', '', '', '', '']]
III	90080	GTTC	['G']	{'G', 'GTTC'}	0.0212766	1	FALSE	TRUE	FALSE	0.0418705	94	0	2	92	[['G', 'intron_variant', 'MODIFIER', 'pat-4', 'WBGene00003931', 'transcript', 'C29F9.7', 'protein_coding', '7/7', 'c.1255-294_1255-292delGAA', '', '', '', '', '', '']]
III	90082	T	['A']	{'T', 'A'}	0.0652174	0.978723	TRUE	FALSE	FALSE	0.122594	92	0	6	86	[['A', 'intron_variant', 'MODIFIER', 'pat-4', 'WBGene00003931', 'transcript', 'C29F9.7', 'protein_coding', '7/7', 'c.1255-293A>T', '', '', '', '', '', '']]
III	90091	A	['C']	{'A', 'C'}	0.0638298	1	TRUE	FALSE	FALSE	0.12015	94	0	6	88	[['C', 'intron_variant', 'MODIFIER', 'pat-4', 'WBGene00003931', 'transcript', 'C29F9.7', 'protein_coding', '7/7', 'c.1255-302T>G', '', '', '', '', '', '']]
III	90095	C	['T']	{'T', 'C'}	0.0212766	1	TRUE	FALSE	TRUE	0.0418705	94	0	2	92	[['T', 'intron_variant', 'MODIFIER', 'pat-4', 'WBGene00003931', 'transcript', 'C29F9.7', 'protein_coding', '7/7', 'c.1255-306G>A', '', '', '', '', '', '']]
III	90107	T	['A', 'C']	{'T', 'A'}	0.0531915	1	TRUE	FALSE	FALSE	0.101263	94	0	5	89	[['A', 'intron_variant', 'MODIFIER', 'pat-4', 'WBGene00003931', 'transcript', 'C29F9.7', 'protein_coding', '7/7', 'c.1254+317A>T', '', '', '', '', '', ''], ['C', 'intron_variant', 'MODIFIER', 'pat-4', 'WBGene00003931', 'transcript', 'C29F9.7', 'protein_coding', '7/7', 'c.1254+317A>G', '', '', '', '', '', '']]
III	90108	G	['A']	{'A', 'G'}	0.0531915	1	TRUE	FALSE	TRUE	0.101263	94	0	5	89	[['A', 'intron_variant', 'MODIFIER', 'pat-4', 'WBGene00003931', 'transcript', 'C29F9.7', 'protein_coding', '7/7', 'c.1254+316C>T', '', '', '', '', '', '']]
III	90112	G	['T']	{'T', 'G'}	0.106383	1	TRUE	FALSE	FALSE	0.191148	94	0	10	84	[['T', 'intron_variant', 'MODIFIER', 'pat-4', 'WBGene00003931', 'transcript', 'C29F9.7', 'protein_coding', '7/7', 'c.1254+312C>A', '', '', '', '', '', '']]
III	90131	C	['A']	{'A', 'C'}	0.0638298	1	TRUE	FALSE	FALSE	0.12015	94	0	6	88	[['A', 'intron_variant', 'MODIFIER', 'pat-4', 'WBGene00003931', 'transcript', 'C29F9.7', 'protein_coding', '7/7', 'c.1254+293G>T', '', '', '', '', '', '']]
III	90139	T	['G']	{'T', 'G'}	0.106383	1	TRUE	FALSE	FALSE	0.191148	94	0	10	84	[['G', 'intron_variant', 'MODIFIER', 'pat-4', 'WBGene00003931', 'transcript', 'C29F9.7', 'protein_coding', '7/7', 'c.1254+285A>C', '', '', '', '', '', '']]
III	90140	T	['C']	{'T', 'C'}	0.0638298	1	TRUE	FALSE	TRUE	0.12015	94	0	6	88	[['C', 'intron_variant', 'MODIFIER', 'pat-4', 'WBGene00003931', 'transcript', 'C29F9.7', 'protein_coding', '7/7', 'c.1254+284A>G', '', '', '', '', '', '']]
III	90141	C	['T']	{'T', 'C'}	0.0537634	0.989362	TRUE	FALSE	TRUE	0.102296	93	0	5	88	[['T', 'intron_variant', 'MODIFIER', 'pat-4', 'WBGene00003931', 'transcript', 'C29F9.7', 'protein_coding', '7/7', 'c.1254+283G>A', '', '', '', '', '', '']]
III	90144	T	['A']	{'T', 'A'}	0.0638298	1	TRUE	FALSE	FALSE	0.12015	94	0	6	88	[['A', 'intron_variant', 'MODIFIER', 'pat-4', 'WBGene00003931', 'transcript', 'C29F9.7', 'protein_coding', '7/7', 'c.1254+280A>T', '', '', '', '', '', '']]
III	90151	G	['T']	{'T', 'G'}	0.0638298	1	TRUE	FALSE	FALSE	0.12015	94	0	6	88	[['T', 'intron_variant', 'MODIFIER', 'pat-4', 'WBGene00003931', 'transcript', 'C29F9.7', 'protein_coding', '7/7', 'c.1254+273C>A', '', '', '', '', '', '']]
III	90153	C	['T']	{'T', 'C'}	0.0666667	0.957447	TRUE	FALSE	TRUE	0.12514	90	0	6	84	[['T', 'intron_variant', 'MODIFIER', 'pat-4', 'WBGene00003931', 'transcript', 'C29F9.7', 'protein_coding', '7/7', 'c.1254+271G>A', '', '', '', '', '', '']]
III	90157	C	['T', 'G']	{'T', 'G', 'C'}	0.106383	1	TRUE	FALSE	FALSE	0.191148	94	2	9	83	[['G', 'intron_variant', 'MODIFIER', 'pat-4', 'WBGene00003931', 'transcript', 'C29F9.7', 'protein_coding', '7/7', 'c.1254+267G>C', '', '', '', '', '', ''], ['T', 'intron_variant', 'MODIFIER', 'pat-4', 'WBGene00003931', 'transcript', 'C29F9.7', 'protein_coding', '7/7', 'c.1254+267G>A', '', '', '', '', '', '']]
III	90170	T	['G']	{'T', 'G'}	0.0638298	1	TRUE	FALSE	FALSE	0.12015	94	0	6	88	[['G', 'intron_variant', 'MODIFIER', 'pat-4', 'WBGene00003931', 'transcript', 'C29F9.7', 'protein_coding', '7/7', 'c.1254+254A>C', '', '', '', '', '', '']]
III	90173	C	['G']	{'G', 'C'}	0.0638298	1	TRUE	FALSE	FALSE	0.12015	94	0	6	88	[['G', 'intron_variant', 'MODIFIER', 'pat-4', 'WBGene00003931', 'transcript', 'C29F9.7', 'protein_coding', '7/7', 'c.1254+251G>C', '', '', '', '', '', '']]
III	90174	G	['A']	{'A', 'G'}	0.0638298	1	TRUE	FALSE	TRUE	0.12015	94	0	6	88	[['A', 'intron_variant', 'MODIFIER', 'pat-4', 'WBGene00003931', 'transcript', 'C29F9.7', 'protein_coding', '7/7', 'c.1254+250C>T', '', '', '', '', '', '']]
III	90185	A	['T']	{'T', 'A'}	0.0531915	1	TRUE	FALSE	FALSE	0.101263	94	0	5	89	[['T', 'intron_variant', 'MODIFIER', 'pat-4', 'WBGene00003931', 'transcript', 'C29F9.7', 'protein_coding', '7/7', 'c.1254+239T>A', '', '', '', '', '', '']]
III	90187	C	['T']	{'T', 'C'}	0.0638298	1	TRUE	FALSE	TRUE	0.12015	94	0	6	88	[['T', 'intron_variant', 'MODIFIER', 'pat-4', 'WBGene00003931', 'transcript', 'C29F9.7', 'protein_coding', '7/7', 'c.1254+237G>A', '', '', '', '', '', '']]
III	90189	C	['T']	{'T', 'C'}	0.0638298	1	TRUE	FALSE	TRUE	0.12015	94	0	6	88	[['T', 'intron_variant', 'MODIFIER', 'pat-4', 'WBGene00003931', 'transcript', 'C29F9.7', 'protein_coding', '7/7', 'c.1254+235G>A', '', '', '', '', '', '']]
III	90215	C	['T']	{'T', 'C'}	0.0638298	1	TRUE	FALSE	TRUE	0.12015	94	0	6	88	[['T', 'intron_variant', 'MODIFIER', 'pat-4', 'WBGene00003931', 'transcript', 'C29F9.7', 'protein_coding', '7/7', 'c.1254+209G>A', '', '', '', '', '', '']]
III	90220	TA	['T', 'TCA']	{'TA', 'T'}	0.0212766	1	FALSE	TRUE	FALSE	0.0418705	94	0	2	92	[['TCA', 'intron_variant', 'MODIFIER', 'pat-4', 'WBGene00003931', 'transcript', 'C29F9.7', 'protein_coding', '7/7', 'c.1254+203_1254+204insG', '', '', '', '', '', ''], ['T', 'intron_variant', 'MODIFIER', 'pat-4', 'WBGene00003931', 'transcript', 'C29F9.7', 'protein_coding', '7/7', 'c.1254+203delT', '', '', '', '', '', '']]
III	90229	T	['A']	{'T', 'A'}	0.0638298	1	TRUE	FALSE	FALSE	0.12015	94	0	6	88	[['A', 'intron_variant', 'MODIFIER', 'pat-4', 'WBGene00003931', 'transcript', 'C29F9.7', 'protein_coding', '7/7', 'c.1254+195A>T', '', '', '', '', '', '']]
III	90241	G	['A']	{'A', 'G'}	0.117021	1	TRUE	FALSE	TRUE	0.20776	94	0	11	83	[['A', 'intron_variant', 'MODIFIER', 'pat-4', 'WBGene00003931', 'transcript', 'C29F9.7', 'protein_coding', '7/7', 'c.1254+183C>T', '', '', '', '', '', '']]
III	90242	T	['C']	{'T', 'C'}	0.0638298	1	TRUE	FALSE	TRUE	0.12015	94	0	6	88	[['C', 'intron_variant', 'MODIFIER', 'pat-4', 'WBGene00003931', 'transcript', 'C29F9.7', 'protein_coding', '7/7', 'c.1254+182A>G', '', '', '', '', '', '']]
III	90247	A	['G']	{'A', 'G'}	0.0638298	1	TRUE	FALSE	TRUE	0.12015	94	0	6	88	[['G', 'intron_variant', 'MODIFIER', 'pat-4', 'WBGene00003931', 'transcript', 'C29F9.7', 'protein_coding', '7/7', 'c.1254+177T>C', '', '', '', '', '', '']]
III	90252	C	['T']	{'T', 'C'}	0.0531915	1	TRUE	FALSE	TRUE	0.101263	94	0	5	89	[['T', 'intron_variant', 'MODIFIER', 'pat-4', 'WBGene00003931', 'transcript', 'C29F9.7', 'protein_coding', '7/7', 'c.1254+172G>A', '', '', '', '', '', '']]
III	90259	T	['A']	{'T', 'A'}	0.0531915	1	TRUE	FALSE	FALSE	0.101263	94	0	5	89	[['A', 'intron_variant', 'MODIFIER', 'pat-4', 'WBGene00003931', 'transcript', 'C29F9.7', 'protein_coding', '7/7', 'c.1254+165A>T', '', '', '', '', '', '']]
III	90273	AAC	['A']	{'A', 'AAC'}	0.0384615	0.968085	FALSE	TRUE	FALSE	0.0743731	91	1	3	87	[['A', 'intron_variant', 'MODIFIER', 'pat-4', 'WBGene00003931', 'transcript', 'C29F9.7', 'protein_coding', '7/7', 'c.1254+149_1254+150delGT', '', '', '', '', '', '']]
III	90282	GA	['G']	{'GA', 'G'}	0.032967	0.968085	FALSE	TRUE	FALSE	0.0641127	91	0	3	88	[['G', 'intron_variant', 'MODIFIER', 'pat-4', 'WBGene00003931', 'transcript', 'C29F9.7', 'protein_coding', '7/7', 'c.1254+141delT', '', '', '', '', '', '']]
III	90296	A	['G']	{'A', 'G'}	0.0549451	0.968085	TRUE	FALSE	TRUE	0.104426	91	0	5	86	[['G', 'intron_variant', 'MODIFIER', 'pat-4', 'WBGene00003931', 'transcript', 'C29F9.7', 'protein_coding', '7/7', 'c.1254+128T>C', '', '', '', '', '', '']]
III	90309	T	['C']	{'T', 'C'}	0.0531915	1	TRUE	FALSE	TRUE	0.101263	94	0	5	89	[['C', 'intron_variant', 'MODIFIER', 'pat-4', 'WBGene00003931', 'transcript', 'C29F9.7', 'protein_coding', '7/7', 'c.1254+115A>G', '', '', '', '', '', '']]
III	90315	C	['A', 'T']	{'T', 'A', 'C'}	0.0957447	1	TRUE	FALSE	FALSE	0.174081	94	0	9	85	[['A', 'intron_variant', 'MODIFIER', 'pat-4', 'WBGene00003931', 'transcript', 'C29F9.7', 'protein_coding', '7/7', 'c.1254+109G>T', '', '', '', '', '', ''], ['T', 'intron_variant', 'MODIFIER', 'pat-4', 'WBGene00003931', 'transcript', 'C29F9.7', 'protein_coding', '7/7', 'c.1254+109G>A', '', '', '', '', '', '']]
III	90319	A	['G']	{'A', 'G'}	0.0319149	1	TRUE	FALSE	TRUE	0.0621231	94	0	3	91	[['G', 'intron_variant', 'MODIFIER', 'pat-4', 'WBGene00003931', 'transcript', 'C29F9.7', 'protein_coding', '7/7', 'c.1254+105T>C', '', '', '', '', '', '']]
III	90381	C	['G']	{'G', 'C'}	0.0638298	1	TRUE	FALSE	FALSE	0.12015	94	0	6	88	[['G', 'intron_variant', 'MODIFIER', 'pat-4', 'WBGene00003931', 'transcript', 'C29F9.7', 'protein_coding', '7/7', 'c.1254+43G>C', '', '', '', '', '', '']]
III	90382	A	['C']	{'A', 'C'}	0.0638298	1	TRUE	FALSE	FALSE	0.12015	94	0	6	88	[['C', 'intron_variant', 'MODIFIER', 'pat-4', 'WBGene00003931', 'transcript', 'C29F9.7', 'protein_coding', '7/7', 'c.1254+42T>G', '', '', '', '', '', '']]
III	90393	C	['T']	{'T', 'C'}	0.0531915	1	TRUE	FALSE	TRUE	0.101263	94	0	5	89	[['T', 'intron_variant', 'MODIFIER', 'pat-4', 'WBGene00003931', 'transcript', 'C29F9.7', 'protein_coding', '7/7', 'c.1254+31G>A', '', '', '', '', '', '']]
III	90411	A	['C']	{'A', 'C'}	0.0638298	1	TRUE	FALSE	FALSE	0.12015	94	0	6	88	[['C', 'intron_variant', 'MODIFIER', 'pat-4', 'WBGene00003931', 'transcript', 'C29F9.7', 'protein_coding', '7/7', 'c.1254+13T>G', '', '', '', '', '', '']]
III	90412	A	['C']	{'A', 'C'}	0.148936	1	TRUE	FALSE	FALSE	0.254864	94	0	14	80	[['C', 'intron_variant', 'MODIFIER', 'pat-4', 'WBGene00003931', 'transcript', 'C29F9.7', 'protein_coding', '7/7', 'c.1254+12T>G', '', '', '', '', '', '']]
III	90413	C	['A', 'T']	{'A', 'C'}	0.0638298	1	TRUE	FALSE	FALSE	0.12015	94	0	6	88	[['A', 'intron_variant', 'MODIFIER', 'pat-4', 'WBGene00003931', 'transcript', 'C29F9.7', 'protein_coding', '7/7', 'c.1254+11G>T', '', '', '', '', '', ''], ['T', 'intron_variant', 'MODIFIER', 'pat-4', 'WBGene00003931', 'transcript', 'C29F9.7', 'protein_coding', '7/7', 'c.1254+11G>A', '', '', '', '', '', '']]
III	90416	T	['C']	{'T', 'C'}	0.0638298	1	TRUE	FALSE	TRUE	0.12015	94	0	6	88	[['C', 'splice_region_variant&intron_variant', 'LOW', 'pat-4', 'WBGene00003931', 'transcript', 'C29F9.7', 'protein_coding', '7/7', 'c.1254+8A>G', '', '', '', '', '', '']]
III	90417	C	['G']	{'G', 'C'}	0.0638298	1	TRUE	FALSE	FALSE	0.12015	94	0	6	88	[['G', 'splice_region_variant&intron_variant', 'LOW', 'pat-4', 'WBGene00003931', 'transcript', 'C29F9.7', 'protein_coding', '7/7', 'c.1254+7G>C', '', '', '', '', '', '']]
III	90436	T	['C']	{'T', 'C'}	0.148936	1	TRUE	FALSE	TRUE	0.254864	94	0	14	80	[['C', 'synonymous_variant', 'LOW', 'pat-4', 'WBGene00003931', 'transcript', 'C29F9.7', 'protein_coding', '7/8', 'c.1242A>G', 'p.Glu414Glu', '1248/1597', '1242/1401', '414/466', '', '']]
III	90442	T	['A']	{'T', 'A'}	0.0638298	1	TRUE	FALSE	FALSE	0.12015	94	0	6	88	[['A', 'synonymous_variant', 'LOW', 'pat-4', 'WBGene00003931', 'transcript', 'C29F9.7', 'protein_coding', '7/8', 'c.1236A>T', 'p.Pro412Pro', '1242/1597', '1236/1401', '412/466', '', '']]
III	90463	G	['A']	{'A', 'G'}	0.0638298	1	TRUE	FALSE	TRUE	0.12015	94	0	6	88	[['A', 'synonymous_variant', 'LOW', 'pat-4', 'WBGene00003931', 'transcript', 'C29F9.7', 'protein_coding', '7/8', 'c.1215C>T', 'p.Val405Val', '1221/1597', '1215/1401', '405/466', '', '']]
III	90523	A	['G']	{'A', 'G'}	0.0638298	1	TRUE	FALSE	TRUE	0.12015	94	0	6	88	[['G', 'synonymous_variant', 'LOW', 'pat-4', 'WBGene00003931', 'transcript', 'C29F9.7', 'protein_coding', '7/8', 'c.1155T>C', 'p.Ile385Ile', '1161/1597', '1155/1401', '385/466', '', '']]
III	90538	T	['C']	{'T', 'C'}	0.0638298	1	TRUE	FALSE	TRUE	0.12015	94	0	6	88	[['C', 'synonymous_variant', 'LOW', 'pat-4', 'WBGene00003931', 'transcript', 'C29F9.7', 'protein_coding', '7/8', 'c.1140A>G', 'p.Pro380Pro', '1146/1597', '1140/1401', '380/466', '', '']]
III	90547	T	['C']	{'T', 'C'}	0.0638298	1	TRUE	FALSE	TRUE	0.12015	94	0	6	88	[['C', 'synonymous_variant', 'LOW', 'pat-4', 'WBGene00003931', 'transcript', 'C29F9.7', 'protein_coding', '7/8', 'c.1131A>G', 'p.Ser377Ser', '1137/1597', '1131/1401', '377/466', '', '']]
III	90574	A	['T', 'C']	{'T', 'A', 'C'}	0.117021	1	TRUE	FALSE	FALSE	0.20776	94	0	11	83	[['C', 'synonymous_variant', 'LOW', 'pat-4', 'WBGene00003931', 'transcript', 'C29F9.7', 'protein_coding', '7/8', 'c.1104T>G', 'p.Pro368Pro', '1110/1597', '1104/1401', '368/466', '', ''], ['T', 'synonymous_variant', 'LOW', 'pat-4', 'WBGene00003931', 'transcript', 'C29F9.7', 'protein_coding', '7/8', 'c.1104T>A', 'p.Pro368Pro', '1110/1597', '1104/1401', '368/466', '', '']]
III	90595	C	['T']	{'T', 'C'}	0.0638298	1	TRUE	FALSE	TRUE	0.12015	94	0	6	88	[['T', 'synonymous_variant', 'LOW', 'pat-4', 'WBGene00003931', 'transcript', 'C29F9.7', 'protein_coding', '7/8', 'c.1083G>A', 'p.Glu361Glu', '1089/1597', '1083/1401', '361/466', '', '']]
III	90616	A	['G']	{'A', 'G'}	0.148936	1	TRUE	FALSE	TRUE	0.254864	94	0	14	80	[['G', 'synonymous_variant', 'LOW', 'pat-4', 'WBGene00003931', 'transcript', 'C29F9.7', 'protein_coding', '7/8', 'c.1062T>C', 'p.Asp354Asp', '1068/1597', '1062/1401', '354/466', '', '']]
III	90625	T	['G']	{'T', 'G'}	0.0638298	1	TRUE	FALSE	FALSE	0.12015	94	0	6	88	[['G', 'synonymous_variant', 'LOW', 'pat-4', 'WBGene00003931', 'transcript', 'C29F9.7', 'protein_coding', '7/8', 'c.1053A>C', 'p.Ser351Ser', '1059/1597', '1053/1401', '351/466', '', '']]
III	90634	G	['C']	{'G', 'C'}	0.0638298	1	TRUE	FALSE	FALSE	0.12015	94	0	6	88	[['C', 'synonymous_variant', 'LOW', 'pat-4', 'WBGene00003931', 'transcript', 'C29F9.7', 'protein_coding', '7/8', 'c.1044C>G', 'p.Ala348Ala', '1050/1597', '1044/1401', '348/466', '', '']]
III	90667	G	['C']	{'G', 'C'}	0.0638298	1	TRUE	FALSE	FALSE	0.12015	94	0	6	88	[['C', 'synonymous_variant', 'LOW', 'pat-4', 'WBGene00003931', 'transcript', 'C29F9.7', 'protein_coding', '7/8', 'c.1011C>G', 'p.Ser337Ser', '1017/1597', '1011/1401', '337/466', '', '']]
III	90690	C	['T']	{'T', 'C'}	0.0638298	1	TRUE	FALSE	TRUE	0.12015	94	0	6	88	[['T', 'splice_region_variant&intron_variant', 'LOW', 'pat-4', 'WBGene00003931', 'transcript', 'C29F9.7', 'protein_coding', '6/7', 'c.996-8G>A', '', '', '', '', '', '']]
III	90699	A	['T']	{'T', 'A'}	0.0638298	1	TRUE	FALSE	FALSE	0.12015	94	0	6	88	[['T', 'intron_variant', 'MODIFIER', 'pat-4', 'WBGene00003931', 'transcript', 'C29F9.7', 'protein_coding', '6/7', 'c.996-17T>A', '', '', '', '', '', '']]
III	90709	T	['C']	{'T', 'C'}	0.0638298	1	TRUE	FALSE	TRUE	0.12015	94	0	6	88	[['C', 'intron_variant', 'MODIFIER', 'pat-4', 'WBGene00003931', 'transcript', 'C29F9.7', 'protein_coding', '6/7', 'c.996-27A>G', '', '', '', '', '', '']]
III	90750	T	['TA', 'TG']	{'TA', 'T'}	0.0543478	0.978723	FALSE	TRUE	FALSE	0.10335	92	0	5	87	[['TA', 'intron_variant', 'MODIFIER', 'pat-4', 'WBGene00003931', 'transcript', 'C29F9.7', 'protein_coding', '6/7', 'c.996-69_996-68insT', '', '', '', '', '', ''], ['TG', 'intron_variant', 'MODIFIER', 'pat-4', 'WBGene00003931', 'transcript', 'C29F9.7', 'protein_coding', '6/7', 'c.996-69_996-68insC', '', '', '', '', '', '']]
III	90763	G	['A']	{'A', 'G'}	0.021978	0.968085	TRUE	FALSE	TRUE	0.0432275	91	0	2	89	[['A', 'intron_variant', 'MODIFIER', 'pat-4', 'WBGene00003931', 'transcript', 'C29F9.7', 'protein_coding', '6/7', 'c.996-81C>T', '', '', '', '', '', '']]
III	90764	G	['A']	{'A', 'G'}	0.0222222	0.957447	TRUE	FALSE	TRUE	0.0436996	90	0	2	88	[['A', 'intron_variant', 'MODIFIER', 'pat-4', 'WBGene00003931', 'transcript', 'C29F9.7', 'protein_coding', '6/7', 'c.996-82C>T', '', '', '', '', '', '']]
III	90767	A	['T']	{'T', 'A'}	0.021978	0.968085	TRUE	FALSE	FALSE	0.0432275	91	0	2	89	[['T', 'intron_variant', 'MODIFIER', 'pat-4', 'WBGene00003931', 'transcript', 'C29F9.7', 'protein_coding', '6/7', 'c.996-85T>A', '', '', '', '', '', '']]
III	90768	A	['T']	{'T', 'A'}	0.0604396	0.968085	TRUE	FALSE	FALSE	0.114201	91	1	5	85	[['T', 'intron_variant', 'MODIFIER', 'pat-4', 'WBGene00003931', 'transcript', 'C29F9.7', 'protein_coding', '6/7', 'c.996-86T>A', '', '', '', '', '', '']]
III	90779	A	['T']	{'T', 'A'}	0.0744681	1	TRUE	FALSE	FALSE	0.138582	94	2	6	86	[['T', 'intron_variant', 'MODIFIER', 'pat-4', 'WBGene00003931', 'transcript', 'C29F9.7', 'protein_coding', '6/7', 'c.996-97T>A', '', '', '', '', '', '']]
III	90806	T	['A']	{'T', 'A'}	0.735955	0.946809	TRUE	FALSE	FALSE	0.390846	89	1	65	23	[['A', 'intron_variant', 'MODIFIER', 'pat-4', 'WBGene00003931', 'transcript', 'C29F9.7', 'protein_coding', '6/7', 'c.996-124A>T', '', '', '', '', '', '']]
III	90812	T	['A']	{'T', 'A'}	0.0384615	0.829787	TRUE	FALSE	FALSE	0.0744417	78	0	3	75	[['A', 'intron_variant', 'MODIFIER', 'pat-4', 'WBGene00003931', 'transcript', 'C29F9.7', 'protein_coding', '6/7', 'c.996-130A>T', '', '', '', '', '', '']]
III	90826	GCCCCAAA	['G']	{'G', 'GCCCCAAA'}	0.0384615	0.829787	FALSE	TRUE	FALSE	0.0744417	78	0	3	75	[['G', 'intron_variant', 'MODIFIER', 'pat-4', 'WBGene00003931', 'transcript', 'C29F9.7', 'protein_coding', '6/7', 'c.996-151_996-145delTTTGGGG', '', '', '', '', '', '']]
III	90848	T	['A']	{'T', 'A'}	0.0625	0.851064	TRUE	FALSE	FALSE	0.117925	80	0	5	75	[['A', 'intron_variant', 'MODIFIER', 'pat-4', 'WBGene00003931', 'transcript', 'C29F9.7', 'protein_coding', '6/7', 'c.996-166A>T', '', '', '', '', '', '']]
III	90887	C	['T']	{'T', 'C'}	0.0625	0.851064	TRUE	FALSE	TRUE	0.117925	80	0	5	75	[['T', 'intron_variant', 'MODIFIER', 'pat-4', 'WBGene00003931', 'transcript', 'C29F9.7', 'protein_coding', '6/7', 'c.996-205G>A', '', '', '', '', '', '']]
III	90909	A	['G']	{'A', 'G'}	0.0595238	0.893617	TRUE	FALSE	TRUE	0.112632	84	0	5	79	[['G', 'intron_variant', 'MODIFIER', 'pat-4', 'WBGene00003931', 'transcript', 'C29F9.7', 'protein_coding', '6/7', 'c.995+190T>C', '', '', '', '', '', '']]
III	90926	G	['A', 'T']	{'A', 'G'}	0.0384615	0.829787	TRUE	FALSE	FALSE	0.0744417	78	0	3	75	[['A', 'intron_variant', 'MODIFIER', 'pat-4', 'WBGene00003931', 'transcript', 'C29F9.7', 'protein_coding', '6/7', 'c.995+173C>T', '', '', '', '', '', ''], ['T', 'intron_variant', 'MODIFIER', 'pat-4', 'WBGene00003931', 'transcript', 'C29F9.7', 'protein_coding', '6/7', 'c.995+173C>A', '', '', '', '', '', '']]
III	90957	G	['A']	{'A', 'G'}	0.0128205	0.829787	TRUE	FALSE	TRUE	0.0254756	78	0	1	77	[['A', 'intron_variant', 'MODIFIER', 'pat-4', 'WBGene00003931', 'transcript', 'C29F9.7', 'protein_coding', '6/7', 'c.995+142C>T', '', '', '', '', '', '']]
III	90996	A	['T']	{'T', 'A'}	0.0641026	0.829787	TRUE	FALSE	FALSE	0.120761	78	0	5	73	[['T', 'intron_variant', 'MODIFIER', 'pat-4', 'WBGene00003931', 'transcript', 'C29F9.7', 'protein_coding', '6/7', 'c.995+103T>A', '', '', '', '', '', '']]
III	91026	A	['G']	{'A', 'G'}	0.0595238	0.893617	TRUE	FALSE	TRUE	0.112632	84	0	5	79	[['G', 'intron_variant', 'MODIFIER', 'pat-4', 'WBGene00003931', 'transcript', 'C29F9.7', 'protein_coding', '6/7', 'c.995+73T>C', '', '', '', '', '', '']]
III	91045	A	['G']	{'A', 'G'}	0.0714286	0.893617	TRUE	FALSE	TRUE	0.133447	84	0	6	78	[['G', 'intron_variant', 'MODIFIER', 'pat-4', 'WBGene00003931', 'transcript', 'C29F9.7', 'protein_coding', '6/7', 'c.995+54T>C', '', '', '', '', '', '']]
III	91048	A	['C']	{'A', 'C'}	0.0714286	0.893617	TRUE	FALSE	FALSE	0.133447	84	0	6	78	[['C', 'intron_variant', 'MODIFIER', 'pat-4', 'WBGene00003931', 'transcript', 'C29F9.7', 'protein_coding', '6/7', 'c.995+51T>G', '', '', '', '', '', '']]
III	91050	T	['A']	{'T', 'A'}	0.0714286	0.893617	TRUE	FALSE	FALSE	0.133447	84	0	6	78	[['A', 'intron_variant', 'MODIFIER', 'pat-4', 'WBGene00003931', 'transcript', 'C29F9.7', 'protein_coding', '6/7', 'c.995+49A>T', '', '', '', '', '', '']]
III	91056	C	['T']	{'T', 'C'}	0.0714286	0.893617	TRUE	FALSE	TRUE	0.133447	84	0	6	78	[['T', 'intron_variant', 'MODIFIER', 'pat-4', 'WBGene00003931', 'transcript', 'C29F9.7', 'protein_coding', '6/7', 'c.995+43G>A', '', '', '', '', '', '']]
III	91058	T	['C']	{'T', 'C'}	0.0238095	0.893617	TRUE	FALSE	TRUE	0.0467636	84	0	2	82	[['C', 'intron_variant', 'MODIFIER', 'pat-4', 'WBGene00003931', 'transcript', 'C29F9.7', 'protein_coding', '6/7', 'c.995+41A>G', '', '', '', '', '', '']]
III	91064	G	['A']	{'A', 'G'}	0.0714286	0.893617	TRUE	FALSE	TRUE	0.133447	84	0	6	78	[['A', 'intron_variant', 'MODIFIER', 'pat-4', 'WBGene00003931', 'transcript', 'C29F9.7', 'protein_coding', '6/7', 'c.995+35C>T', '', '', '', '', '', '']]
III	91065	G	['A']	{'A', 'G'}	0.0714286	0.893617	TRUE	FALSE	TRUE	0.133447	84	0	6	78	[['A', 'intron_variant', 'MODIFIER', 'pat-4', 'WBGene00003931', 'transcript', 'C29F9.7', 'protein_coding', '6/7', 'c.995+34C>T', '', '', '', '', '', '']]
III	91071	T	['A']	{'T', 'A'}	0.0714286	0.893617	TRUE	FALSE	FALSE	0.133447	84	0	6	78	[['A', 'intron_variant', 'MODIFIER', 'pat-4', 'WBGene00003931', 'transcript', 'C29F9.7', 'protein_coding', '6/7', 'c.995+28A>T', '', '', '', '', '', '']]
III	91082	C	['A']	{'A', 'C'}	0.130952	0.893617	TRUE	FALSE	FALSE	0.228971	84	0	11	73	[['A', 'intron_variant', 'MODIFIER', 'pat-4', 'WBGene00003931', 'transcript', 'C29F9.7', 'protein_coding', '6/7', 'c.995+17G>T', '', '', '', '', '', '']]
III	91085	T	['C']	{'T', 'C'}	0.0714286	0.893617	TRUE	FALSE	TRUE	0.133447	84	0	6	78	[['C', 'intron_variant', 'MODIFIER', 'pat-4', 'WBGene00003931', 'transcript', 'C29F9.7', 'protein_coding', '6/7', 'c.995+14A>G', '', '', '', '', '', '']]
III	91089	C	['T']	{'T', 'C'}	0.0595238	0.893617	TRUE	FALSE	TRUE	0.112632	84	0	5	79	[['T', 'intron_variant', 'MODIFIER', 'pat-4', 'WBGene00003931', 'transcript', 'C29F9.7', 'protein_coding', '6/7', 'c.995+10G>A', '', '', '', '', '', '']]
III	91143	A	['G']	{'A', 'G'}	0.0714286	0.893617	TRUE	FALSE	TRUE	0.133447	84	0	6	78	[['G', 'synonymous_variant', 'LOW', 'pat-4', 'WBGene00003931', 'transcript', 'C29F9.7', 'protein_coding', '6/8', 'c.951T>C', 'p.Ala317Ala', '957/1597', '951/1401', '317/466', '', '']]
III	91146	A	['G']	{'A', 'G'}	0.0714286	0.893617	TRUE	FALSE	TRUE	0.133447	84	0	6	78	[['G', 'synonymous_variant', 'LOW', 'pat-4', 'WBGene00003931', 'transcript', 'C29F9.7', 'protein_coding', '6/8', 'c.948T>C', 'p.Ile316Ile', '954/1597', '948/1401', '316/466', '', '']]
III	91158	G	['A']	{'A', 'G'}	0.0714286	0.893617	TRUE	FALSE	TRUE	0.133447	84	0	6	78	[['A', 'synonymous_variant', 'LOW', 'pat-4', 'WBGene00003931', 'transcript', 'C29F9.7', 'protein_coding', '6/8', 'c.936C>T', 'p.Phe312Phe', '942/1597', '936/1401', '312/466', '', '']]
III	91191	A	['G']	{'A', 'G'}	0.0714286	0.893617	TRUE	FALSE	TRUE	0.133447	84	0	6	78	[['G', 'splice_region_variant&synonymous_variant', 'LOW', 'pat-4', 'WBGene00003931', 'transcript', 'C29F9.7', 'protein_coding', '6/8', 'c.903T>C', 'p.Ser301Ser', '909/1597', '903/1401', '301/466', '', '']]
III	91196	C	['T']	{'T', 'C'}	0.0714286	0.893617	TRUE	FALSE	TRUE	0.133447	84	0	6	78	[['T', 'splice_region_variant&intron_variant', 'LOW', 'pat-4', 'WBGene00003931', 'transcript', 'C29F9.7', 'protein_coding', '5/7', 'c.902-4G>A', '', '', '', '', '', '']]
III	91199	T	['C']	{'T', 'C'}	0.0714286	0.893617	TRUE	FALSE	TRUE	0.133447	84	0	6	78	[['C', 'splice_region_variant&intron_variant', 'LOW', 'pat-4', 'WBGene00003931', 'transcript', 'C29F9.7', 'protein_coding', '5/7', 'c.902-7A>G', '', '', '', '', '', '']]
III	91200	A	['G']	{'A', 'G'}	0.0714286	0.893617	TRUE	FALSE	TRUE	0.133447	84	0	6	78	[['G', 'splice_region_variant&intron_variant', 'LOW', 'pat-4', 'WBGene00003931', 'transcript', 'C29F9.7', 'protein_coding', '5/7', 'c.902-8T>C', '', '', '', '', '', '']]
III	91209	A	['C']	{'A', 'C'}	0.0714286	0.893617	TRUE	FALSE	FALSE	0.133447	84	0	6	78	[['C', 'intron_variant', 'MODIFIER', 'pat-4', 'WBGene00003931', 'transcript', 'C29F9.7', 'protein_coding', '5/7', 'c.902-17T>G', '', '', '', '', '', '']]
III	91226	C	['T']	{'T', 'C'}	0.0632911	0.840426	TRUE	FALSE	TRUE	0.119326	79	0	5	74	[['T', 'intron_variant', 'MODIFIER', 'pat-4', 'WBGene00003931', 'transcript', 'C29F9.7', 'protein_coding', '5/7', 'c.902-34G>A', '', '', '', '', '', '']]
III	91267	C	['T']	{'T', 'C'}	0.0714286	0.893617	TRUE	FALSE	TRUE	0.133447	84	0	6	78	[['T', 'intron_variant', 'MODIFIER', 'pat-4', 'WBGene00003931', 'transcript', 'C29F9.7', 'protein_coding', '5/7', 'c.902-75G>A', '', '', '', '', '', '']]
III	91268	G	['T']	{'T', 'G'}	0.0714286	0.893617	TRUE	FALSE	FALSE	0.133447	84	0	6	78	[['T', 'intron_variant', 'MODIFIER', 'pat-4', 'WBGene00003931', 'transcript', 'C29F9.7', 'protein_coding', '5/7', 'c.902-76C>A', '', '', '', '', '', '']]
III	91271	A	['G']	{'A', 'G'}	0.0714286	0.893617	TRUE	FALSE	TRUE	0.133447	84	0	6	78	[['G', 'intron_variant', 'MODIFIER', 'pat-4', 'WBGene00003931', 'transcript', 'C29F9.7', 'protein_coding', '5/7', 'c.902-79T>C', '', '', '', '', '', '']]
III	91272	A	['G']	{'A', 'G'}	0.0595238	0.893617	TRUE	FALSE	TRUE	0.112632	84	0	5	79	[['G', 'intron_variant', 'MODIFIER', 'pat-4', 'WBGene00003931', 'transcript', 'C29F9.7', 'protein_coding', '5/7', 'c.902-80T>C', '', '', '', '', '', '']]
III	91283	A	['G']	{'A', 'G'}	0.0595238	0.893617	TRUE	FALSE	TRUE	0.112632	84	0	5	79	[['G', 'intron_variant', 'MODIFIER', 'pat-4', 'WBGene00003931', 'transcript', 'C29F9.7', 'protein_coding', '5/7', 'c.902-91T>C', '', '', '', '', '', '']]
III	91306	C	['T']	{'T', 'C'}	0.0238095	0.893617	TRUE	FALSE	TRUE	0.0467636	84	0	2	82	[['T', 'intron_variant', 'MODIFIER', 'pat-4', 'WBGene00003931', 'transcript', 'C29F9.7', 'protein_coding', '5/7', 'c.902-114G>A', '', '', '', '', '', '']]
III	91309	G	['C']	{'G', 'C'}	0.0714286	0.893617	TRUE	FALSE	FALSE	0.133447	84	0	6	78	[['C', 'intron_variant', 'MODIFIER', 'pat-4', 'WBGene00003931', 'transcript', 'C29F9.7', 'protein_coding', '5/7', 'c.902-117C>G', '', '', '', '', '', '']]
III	91310	C	['A']	{'A', 'C'}	0.0714286	0.893617	TRUE	FALSE	FALSE	0.133447	84	0	6	78	[['A', 'intron_variant', 'MODIFIER', 'pat-4', 'WBGene00003931', 'transcript', 'C29F9.7', 'protein_coding', '5/7', 'c.902-118G>T', '', '', '', '', '', '']]
III	91324	A	['G']	{'A', 'G'}	0.107143	0.893617	TRUE	FALSE	TRUE	0.192472	84	0	9	75	[['G', 'intron_variant', 'MODIFIER', 'pat-4', 'WBGene00003931', 'transcript', 'C29F9.7', 'protein_coding', '5/7', 'c.902-132T>C', '', '', '', '', '', '']]
III	91348	A	['G']	{'A', 'G'}	0.0714286	0.893617	TRUE	FALSE	TRUE	0.133447	84	0	6	78	[['G', 'intron_variant', 'MODIFIER', 'pat-4', 'WBGene00003931', 'transcript', 'C29F9.7', 'protein_coding', '5/7', 'c.902-156T>C', '', '', '', '', '', '']]
III	91357	G	['C']	{'G', 'C'}	0.0714286	0.893617	TRUE	FALSE	FALSE	0.133447	84	0	6	78	[['C', 'intron_variant', 'MODIFIER', 'pat-4', 'WBGene00003931', 'transcript', 'C29F9.7', 'protein_coding', '5/7', 'c.902-165C>G', '', '', '', '', '', '']]
III	91359	T	['C']	{'T', 'C'}	0.0714286	0.893617	TRUE	FALSE	TRUE	0.133447	84	0	6	78	[['C', 'intron_variant', 'MODIFIER', 'pat-4', 'WBGene00003931', 'transcript', 'C29F9.7', 'protein_coding', '5/7', 'c.902-167A>G', '', '', '', '', '', '']]
III	91373	T	['C']	{'T', 'C'}	0.0714286	0.893617	TRUE	FALSE	TRUE	0.133447	84	0	6	78	[['C', 'intron_variant', 'MODIFIER', 'pat-4', 'WBGene00003931', 'transcript', 'C29F9.7', 'protein_coding', '5/7', 'c.902-181A>G', '', '', '', '', '', '']]
III	91406	A	['G']	{'A', 'G'}	0.0595238	0.893617	TRUE	FALSE	TRUE	0.112632	84	0	5	79	[['G', 'intron_variant', 'MODIFIER', 'pat-4', 'WBGene00003931', 'transcript', 'C29F9.7', 'protein_coding', '5/7', 'c.901+201T>C', '', '', '', '', '', '']]
III	91408	A	['G']	{'A', 'G'}	0.0357143	0.893617	TRUE	FALSE	TRUE	0.06929	84	0	3	81	[['G', 'intron_variant', 'MODIFIER', 'pat-4', 'WBGene00003931', 'transcript', 'C29F9.7', 'protein_coding', '5/7', 'c.901+199T>C', '', '', '', '', '', '']]
III	91412	A	['T']	{'T', 'A'}	0.0714286	0.893617	TRUE	FALSE	FALSE	0.133447	84	0	6	78	[['T', 'intron_variant', 'MODIFIER', 'pat-4', 'WBGene00003931', 'transcript', 'C29F9.7', 'protein_coding', '5/7', 'c.901+195T>A', '', '', '', '', '', '']]
III	91417	T	['G']	{'T', 'G'}	0.0714286	0.893617	TRUE	FALSE	FALSE	0.133447	84	0	6	78	[['G', 'intron_variant', 'MODIFIER', 'pat-4', 'WBGene00003931', 'transcript', 'C29F9.7', 'protein_coding', '5/7', 'c.901+190A>C', '', '', '', '', '', '']]
III	91422	G	['A']	{'A', 'G'}	0.0714286	0.893617	TRUE	FALSE	TRUE	0.133447	84	0	6	78	[['A', 'intron_variant', 'MODIFIER', 'pat-4', 'WBGene00003931', 'transcript', 'C29F9.7', 'protein_coding', '5/7', 'c.901+185C>T', '', '', '', '', '', '']]
III	91425	T	['C']	{'T', 'C'}	0.0714286	0.893617	TRUE	FALSE	TRUE	0.133447	84	0	6	78	[['C', 'intron_variant', 'MODIFIER', 'pat-4', 'WBGene00003931', 'transcript', 'C29F9.7', 'protein_coding', '5/7', 'c.901+182A>G', '', '', '', '', '', '']]
III	91429	C	['T']	{'T', 'C'}	0.0714286	0.893617	TRUE	FALSE	TRUE	0.133447	84	0	6	78	[['T', 'intron_variant', 'MODIFIER', 'pat-4', 'WBGene00003931', 'transcript', 'C29F9.7', 'protein_coding', '5/7', 'c.901+178G>A', '', '', '', '', '', '']]
III	91434	C	['A']	{'A', 'C'}	0.0714286	0.893617	TRUE	FALSE	FALSE	0.133447	84	0	6	78	[['A', 'intron_variant', 'MODIFIER', 'pat-4', 'WBGene00003931', 'transcript', 'C29F9.7', 'protein_coding', '5/7', 'c.901+173G>T', '', '', '', '', '', '']]
III	91437	A	['G']	{'A', 'G'}	0.0714286	0.893617	TRUE	FALSE	TRUE	0.133447	84	0	6	78	[['G', 'intron_variant', 'MODIFIER', 'pat-4', 'WBGene00003931', 'transcript', 'C29F9.7', 'protein_coding', '5/7', 'c.901+170T>C', '', '', '', '', '', '']]
III	91438	G	['A']	{'A', 'G'}	0.0714286	0.893617	TRUE	FALSE	TRUE	0.133447	84	0	6	78	[['A', 'intron_variant', 'MODIFIER', 'pat-4', 'WBGene00003931', 'transcript', 'C29F9.7', 'protein_coding', '5/7', 'c.901+169C>T', '', '', '', '', '', '']]
III	91463	T	['C']	{'T', 'C'}	0.0714286	0.893617	TRUE	FALSE	TRUE	0.133447	84	0	6	78	[['C', 'intron_variant', 'MODIFIER', 'pat-4', 'WBGene00003931', 'transcript', 'C29F9.7', 'protein_coding', '5/7', 'c.901+144A>G', '', '', '', '', '', '']]
III	91474	A	['T']	{'T', 'A'}	0.0714286	0.893617	TRUE	FALSE	FALSE	0.133447	84	0	6	78	[['T', 'intron_variant', 'MODIFIER', 'pat-4', 'WBGene00003931', 'transcript', 'C29F9.7', 'protein_coding', '5/7', 'c.901+133T>A', '', '', '', '', '', '']]
III	91476	A	['AAG']	{'A', 'AAG'}	0.0714286	0.893617	FALSE	TRUE	FALSE	0.133447	84	0	6	78	[['AAG', 'intron_variant', 'MODIFIER', 'pat-4', 'WBGene00003931', 'transcript', 'C29F9.7', 'protein_coding', '5/7', 'c.901+130_901+131insCT', '', '', '', '', '', '']]
III	91483	GA	['G', 'GAA']	{'GAA', 'GA', 'G'}	0.0481928	0.882979	FALSE	TRUE	FALSE	0.0922965	83	0	4	79	[['G', 'intron_variant', 'MODIFIER', 'pat-4', 'WBGene00003931', 'transcript', 'C29F9.7', 'protein_coding', '5/7', 'c.901+123delT', '', '', '', '', '', ''], ['GAA', 'intron_variant', 'MODIFIER', 'pat-4', 'WBGene00003931', 'transcript', 'C29F9.7', 'protein_coding', '5/7', 'c.901+122_901+123insT', '', '', '', '', '', '']]
III	91509	A	['T']	{'T', 'A'}	0.0512821	0.829787	TRUE	FALSE	FALSE	0.0979322	78	0	4	74	[['T', 'intron_variant', 'MODIFIER', 'pat-4', 'WBGene00003931', 'transcript', 'C29F9.7', 'protein_coding', '5/7', 'c.901+98T>A', '', '', '', '', '', '']]
III	91553	C	['A']	{'A', 'C'}	0.060241	0.882979	TRUE	FALSE	FALSE	0.11391	83	0	5	78	[['A', 'intron_variant', 'MODIFIER', 'pat-4', 'WBGene00003931', 'transcript', 'C29F9.7', 'protein_coding', '5/7', 'c.901+54G>T', '', '', '', '', '', '']]
III	91566	T	['C']	{'T', 'C'}	0.0963855	0.882979	TRUE	FALSE	TRUE	0.175246	83	0	8	75	[['C', 'intron_variant', 'MODIFIER', 'pat-4', 'WBGene00003931', 'transcript', 'C29F9.7', 'protein_coding', '5/7', 'c.901+41A>G', '', '', '', '', '', '']]
III	91583	T	['C']	{'T', 'C'}	0.659341	0.968085	TRUE	FALSE	TRUE	0.451703	91	0	60	31	[['C', 'intron_variant', 'MODIFIER', 'pat-4', 'WBGene00003931', 'transcript', 'C29F9.7', 'protein_coding', '5/7', 'c.901+24A>G', '', '', '', '', '', '']]
III	91588	G	['A']	{'A', 'G'}	0.0659341	0.968085	TRUE	FALSE	TRUE	0.123854	91	0	6	85	[['A', 'intron_variant', 'MODIFIER', 'pat-4', 'WBGene00003931', 'transcript', 'C29F9.7', 'protein_coding', '5/7', 'c.901+19C>T', '', '', '', '', '', '']]
III	91596	T	['C']	{'T', 'C'}	0.0659341	0.968085	TRUE	FALSE	TRUE	0.123854	91	0	6	85	[['C', 'intron_variant', 'MODIFIER', 'pat-4', 'WBGene00003931', 'transcript', 'C29F9.7', 'protein_coding', '5/7', 'c.901+11A>G', '', '', '', '', '', '']]
III	91597	C	['T']	{'T', 'C'}	0.0549451	0.968085	TRUE	FALSE	TRUE	0.104426	91	0	5	86	[['T', 'intron_variant', 'MODIFIER', 'pat-4', 'WBGene00003931', 'transcript', 'C29F9.7', 'protein_coding', '5/7', 'c.901+10G>A', '', '', '', '', '', '']]
III	91677	T	['C']	{'T', 'C'}	0.0659341	0.968085	TRUE	FALSE	TRUE	0.123854	91	0	6	85	[['C', 'synonymous_variant', 'LOW', 'pat-4', 'WBGene00003931', 'transcript', 'C29F9.7', 'protein_coding', '5/8', 'c.831A>G', 'p.Pro277Pro', '837/1597', '831/1401', '277/466', '', '']]
III	91689	C	['A', 'G']	{'A', 'G', 'C'}	0.0879121	0.968085	TRUE	FALSE	FALSE	0.161253	91	0	8	83	[['A', 'synonymous_variant', 'LOW', 'pat-4', 'WBGene00003931', 'transcript', 'C29F9.7', 'protein_coding', '5/8', 'c.819G>T', 'p.Ala273Ala', '825/1597', '819/1401', '273/466', '', ''], ['G', 'synonymous_variant', 'LOW', 'pat-4', 'WBGene00003931', 'transcript', 'C29F9.7', 'protein_coding', '5/8', 'c.819G>C', 'p.Ala273Ala', '825/1597', '819/1401', '273/466', '', '']]
III	91695	G	['T']	{'T', 'G'}	0.0659341	0.968085	TRUE	FALSE	FALSE	0.123854	91	0	6	85	[['T', 'synonymous_variant', 'LOW', 'pat-4', 'WBGene00003931', 'transcript', 'C29F9.7', 'protein_coding', '5/8', 'c.813C>A', 'p.Leu271Leu', '819/1597', '813/1401', '271/466', '', '']]
III	91697	G	['A']	{'A', 'G'}	0.0659341	0.968085	TRUE	FALSE	TRUE	0.123854	91	0	6	85	[['A', 'missense_variant', 'MODERATE', 'pat-4', 'WBGene00003931', 'transcript', 'C29F9.7', 'protein_coding', '5/8', 'c.811C>T', 'p.Leu271Phe', '817/1597', '811/1401', '271/466', '', '']]
III	91740	A	['G']	{'A', 'G'}	0.0659341	0.968085	TRUE	FALSE	TRUE	0.123854	91	0	6	85	[['G', 'synonymous_variant', 'LOW', 'pat-4', 'WBGene00003931', 'transcript', 'C29F9.7', 'protein_coding', '5/8', 'c.768T>C', 'p.Phe256Phe', '774/1597', '768/1401', '256/466', '', '']]
III	91806	A	['G']	{'A', 'G'}	0.0659341	0.968085	TRUE	FALSE	TRUE	0.123854	91	0	6	85	[['G', 'synonymous_variant', 'LOW', 'pat-4', 'WBGene00003931', 'transcript', 'C29F9.7', 'protein_coding', '5/8', 'c.702T>C', 'p.Ile234Ile', '708/1597', '702/1401', '234/466', '', '']]
III	91809	A	['G']	{'A', 'G'}	0.0659341	0.968085	TRUE	FALSE	TRUE	0.123854	91	0	6	85	[['G', 'synonymous_variant', 'LOW', 'pat-4', 'WBGene00003931', 'transcript', 'C29F9.7', 'protein_coding', '5/8', 'c.699T>C', 'p.Asp233Asp', '705/1597', '699/1401', '233/466', '', '']]
III	91827	T	['G']	{'T', 'G'}	0.0659341	0.968085	TRUE	FALSE	FALSE	0.123854	91	0	6	85	[['G', 'synonymous_variant', 'LOW', 'pat-4', 'WBGene00003931', 'transcript', 'C29F9.7', 'protein_coding', '5/8', 'c.681A>C', 'p.Gly227Gly', '687/1597', '681/1401', '227/466', '', '']]
III	91836	C	['G']	{'G', 'C'}	0.120879	0.968085	TRUE	FALSE	FALSE	0.213709	91	0	11	80	[['G', 'synonymous_variant', 'LOW', 'pat-4', 'WBGene00003931', 'transcript', 'C29F9.7', 'protein_coding', '5/8', 'c.672G>C', 'p.Leu224Leu', '678/1597', '672/1401', '224/466', '', '']]
III	91851	T	['C']	{'T', 'C'}	0.0659341	0.968085	TRUE	FALSE	TRUE	0.123854	91	0	6	85	[['C', 'synonymous_variant', 'LOW', 'pat-4', 'WBGene00003931', 'transcript', 'C29F9.7', 'protein_coding', '5/8', 'c.657A>G', 'p.Ser219Ser', '663/1597', '657/1401', '219/466', '', '']]
III	91857	A	['G']	{'A', 'G'}	0.0659341	0.968085	TRUE	FALSE	TRUE	0.123854	91	0	6	85	[['G', 'synonymous_variant', 'LOW', 'pat-4', 'WBGene00003931', 'transcript', 'C29F9.7', 'protein_coding', '5/8', 'c.651T>C', 'p.Ala217Ala', '657/1597', '651/1401', '217/466', '', '']]
III	91869	C	['T']	{'T', 'C'}	0.0804598	0.925532	TRUE	FALSE	TRUE	0.148827	87	0	7	80	[['T', 'splice_region_variant&intron_variant', 'LOW', 'pat-4', 'WBGene00003931', 'transcript', 'C29F9.7', 'protein_coding', '4/7', 'c.646-7G>A', '', '', '', '', '', '']]
III	91933	T	['C']	{'T', 'C'}	0.0568182	0.93617	TRUE	FALSE	TRUE	0.107792	88	0	5	83	[['C', 'intron_variant', 'MODIFIER', 'pat-4', 'WBGene00003931', 'transcript', 'C29F9.7', 'protein_coding', '4/7', 'c.646-71A>G', '', '', '', '', '', '']]
III	91942	A	['G']	{'A', 'G'}	0.0568182	0.93617	TRUE	FALSE	TRUE	0.107792	88	0	5	83	[['G', 'intron_variant', 'MODIFIER', 'pat-4', 'WBGene00003931', 'transcript', 'C29F9.7', 'protein_coding', '4/7', 'c.646-80T>C', '', '', '', '', '', '']]
III	91974	CA	['C']	{'CA', 'C'}	0.0344828	0.925532	FALSE	TRUE	FALSE	0.0669723	87	0	3	84	[['C', 'intron_variant', 'MODIFIER', 'pat-4', 'WBGene00003931', 'transcript', 'C29F9.7', 'protein_coding', '4/7', 'c.646-113delT', '', '', '', '', '', '']]
III	92011	TCA	['TA', 'T']	{'TCA', 'TA'}	0.0574713	0.925532	FALSE	TRUE	FALSE	0.108963	87	0	5	82	[['TA', 'intron_variant', 'MODIFIER', 'pat-4', 'WBGene00003931', 'transcript', 'C29F9.7', 'protein_coding', '4/7', 'c.646-150delG', '', '', '', '', '', ''], ['T', 'intron_variant', 'MODIFIER', 'pat-4', 'WBGene00003931', 'transcript', 'C29F9.7', 'protein_coding', '4/7', 'c.646-151_646-150delTG', '', '', '', '', '', '']]
III	92047	T	['C']	{'T', 'C'}	0.0337079	0.946809	TRUE	FALSE	TRUE	0.0655113	89	0	3	86	[['C', 'intron_variant', 'MODIFIER', 'pat-4', 'WBGene00003931', 'transcript', 'C29F9.7', 'protein_coding', '4/7', 'c.646-185A>G', '', '', '', '', '', '']]
III	92077	C	['T']	{'T', 'C'}	0.0674157	0.946809	TRUE	FALSE	TRUE	0.126452	89	0	6	83	[['T', 'intron_variant', 'MODIFIER', 'pat-4', 'WBGene00003931', 'transcript', 'C29F9.7', 'protein_coding', '4/7', 'c.646-215G>A', '', '', '', '', '', '']]
III	92094	A	['G']	{'A', 'G'}	0.0340909	0.93617	TRUE	FALSE	TRUE	0.0662338	88	0	3	85	[['G', 'intron_variant', 'MODIFIER', 'pat-4', 'WBGene00003931', 'transcript', 'C29F9.7', 'protein_coding', '4/7', 'c.646-232T>C', '', '', '', '', '', '']]
III	92103	T	['A']	{'T', 'A'}	0.0227273	0.93617	TRUE	FALSE	FALSE	0.0446753	88	0	2	86	[['A', 'intron_variant', 'MODIFIER', 'pat-4', 'WBGene00003931', 'transcript', 'C29F9.7', 'protein_coding', '4/7', 'c.646-241A>T', '', '', '', '', '', '']]
III	92113	T	['C']	{'T', 'C'}	0.0568182	0.93617	TRUE	FALSE	TRUE	0.107792	88	0	5	83	[['C', 'intron_variant', 'MODIFIER', 'pat-4', 'WBGene00003931', 'transcript', 'C29F9.7', 'protein_coding', '4/7', 'c.646-251A>G', '', '', '', '', '', '']]
III	92155	A	['T']	{'T', 'A'}	0.0568182	0.93617	TRUE	FALSE	FALSE	0.107792	88	0	5	83	[['T', 'intron_variant', 'MODIFIER', 'pat-4', 'WBGene00003931', 'transcript', 'C29F9.7', 'protein_coding', '4/7', 'c.646-293T>A', '', '', '', '', '', '']]
III	92162	G	['A']	{'A', 'G'}	0.0340909	0.93617	TRUE	FALSE	TRUE	0.0662338	88	0	3	85	[['A', 'intron_variant', 'MODIFIER', 'pat-4', 'WBGene00003931', 'transcript', 'C29F9.7', 'protein_coding', '4/7', 'c.646-300C>T', '', '', '', '', '', '']]
III	92178	C	['A']	{'A', 'C'}	0.0888889	0.957447	TRUE	FALSE	FALSE	0.16288	90	0	8	82	[['A', 'intron_variant', 'MODIFIER', 'pat-4', 'WBGene00003931', 'transcript', 'C29F9.7', 'protein_coding', '4/7', 'c.645+314G>T', '', '', '', '', '', '']]
III	92180	A	['T']	{'T', 'A'}	0.0555556	0.957447	TRUE	FALSE	FALSE	0.105525	90	0	5	85	[['T', 'intron_variant', 'MODIFIER', 'pat-4', 'WBGene00003931', 'transcript', 'C29F9.7', 'protein_coding', '4/7', 'c.645+312T>A', '', '', '', '', '', '']]
III	92254	G	['A']	{'A', 'G'}	0.0111111	0.957447	TRUE	FALSE	TRUE	0.0220981	90	0	1	89	[['A', 'intron_variant', 'MODIFIER', 'pat-4', 'WBGene00003931', 'transcript', 'C29F9.7', 'protein_coding', '4/7', 'c.645+238C>T', '', '', '', '', '', '']]
III	92260	G	['A']	{'A', 'G'}	0.0555556	0.957447	TRUE	FALSE	TRUE	0.105525	90	0	5	85	[['A', 'intron_variant', 'MODIFIER', 'pat-4', 'WBGene00003931', 'transcript', 'C29F9.7', 'protein_coding', '4/7', 'c.645+232C>T', '', '', '', '', '', '']]
III	92262	A	['C']	{'A', 'C'}	0.0888889	0.957447	TRUE	FALSE	FALSE	0.16288	90	0	8	82	[['C', 'intron_variant', 'MODIFIER', 'pat-4', 'WBGene00003931', 'transcript', 'C29F9.7', 'protein_coding', '4/7', 'c.645+230T>G', '', '', '', '', '', '']]
III	92292	A	['G']	{'A', 'G'}	0.0555556	0.957447	TRUE	FALSE	TRUE	0.105525	90	0	5	85	[['G', 'intron_variant', 'MODIFIER', 'pat-4', 'WBGene00003931', 'transcript', 'C29F9.7', 'protein_coding', '4/7', 'c.645+200T>C', '', '', '', '', '', '']]
III	92293	C	['T', 'A']	{'T', 'A', 'C'}	0.0888889	0.957447	TRUE	FALSE	FALSE	0.16288	90	0	8	82	[['A', 'intron_variant', 'MODIFIER', 'pat-4', 'WBGene00003931', 'transcript', 'C29F9.7', 'protein_coding', '4/7', 'c.645+199G>T', '', '', '', '', '', ''], ['T', 'intron_variant', 'MODIFIER', 'pat-4', 'WBGene00003931', 'transcript', 'C29F9.7', 'protein_coding', '4/7', 'c.645+199G>A', '', '', '', '', '', '']]
III	92316	T	['A']	{'T', 'A'}	0.0555556	0.957447	TRUE	FALSE	FALSE	0.105525	90	0	5	85	[['A', 'intron_variant', 'MODIFIER', 'pat-4', 'WBGene00003931', 'transcript', 'C29F9.7', 'protein_coding', '4/7', 'c.645+176A>T', '', '', '', '', '', '']]
III	92407	T	['C']	{'T', 'C'}	0.0555556	0.957447	TRUE	FALSE	TRUE	0.105525	90	0	5	85	[['C', 'intron_variant', 'MODIFIER', 'pat-4', 'WBGene00003931', 'transcript', 'C29F9.7', 'protein_coding', '4/7', 'c.645+85A>G', '', '', '', '', '', '']]
III	92408	C	['T']	{'T', 'C'}	0.0555556	0.957447	TRUE	FALSE	TRUE	0.105525	90	0	5	85	[['T', 'intron_variant', 'MODIFIER', 'pat-4', 'WBGene00003931', 'transcript', 'C29F9.7', 'protein_coding', '4/7', 'c.645+84G>A', '', '', '', '', '', '']]
III	92414	C	['A']	{'A', 'C'}	0.0111111	0.957447	TRUE	FALSE	FALSE	0.0220981	90	0	1	89	[['A', 'intron_variant', 'MODIFIER', 'pat-4', 'WBGene00003931', 'transcript', 'C29F9.7', 'protein_coding', '4/7', 'c.645+78G>T', '', '', '', '', '', '']]
III	92442	C	['T']	{'T', 'C'}	0.0333333	0.957447	TRUE	FALSE	TRUE	0.0648045	90	0	3	87	[['T', 'intron_variant', 'MODIFIER', 'pat-4', 'WBGene00003931', 'transcript', 'C29F9.7', 'protein_coding', '4/7', 'c.645+50G>A', '', '', '', '', '', '']]
III	92482	T	['A', 'G']	{'T', 'A'}	0.0659341	0.968085	TRUE	FALSE	FALSE	0.123854	91	0	6	85	[['A', 'intron_variant', 'MODIFIER', 'pat-4', 'WBGene00003931', 'transcript', 'C29F9.7', 'protein_coding', '4/7', 'c.645+10A>T', '', '', '', '', '', ''], ['G', 'intron_variant', 'MODIFIER', 'pat-4', 'WBGene00003931', 'transcript', 'C29F9.7', 'protein_coding', '4/7', 'c.645+10A>C', '', '', '', '', '', '']]
III	92513	G	['T']	{'T', 'G'}	0.0659341	0.968085	TRUE	FALSE	FALSE	0.123854	91	0	6	85	[['T', 'synonymous_variant', 'LOW', 'pat-4', 'WBGene00003931', 'transcript', 'C29F9.7', 'protein_coding', '4/8', 'c.624C>A', 'p.Ser208Ser', '630/1597', '624/1401', '208/466', '', '']]
III	92516	G	['C']	{'G', 'C'}	0.0659341	0.968085	TRUE	FALSE	FALSE	0.123854	91	0	6	85	[['C', 'synonymous_variant', 'LOW', 'pat-4', 'WBGene00003931', 'transcript', 'C29F9.7', 'protein_coding', '4/8', 'c.621C>G', 'p.Val207Val', '627/1597', '621/1401', '207/466', '', '']]
III	92519	G	['A']	{'A', 'G'}	0.0659341	0.968085	TRUE	FALSE	TRUE	0.123854	91	0	6	85	[['A', 'synonymous_variant', 'LOW', 'pat-4', 'WBGene00003931', 'transcript', 'C29F9.7', 'protein_coding', '4/8', 'c.618C>T', 'p.Asp206Asp', '624/1597', '618/1401', '206/466', '', '']]
III	92528	G	['A']	{'A', 'G'}	0.0659341	0.968085	TRUE	FALSE	TRUE	0.123854	91	0	6	85	[['A', 'synonymous_variant', 'LOW', 'pat-4', 'WBGene00003931', 'transcript', 'C29F9.7', 'protein_coding', '4/8', 'c.609C>T', 'p.Thr203Thr', '615/1597', '609/1401', '203/466', '', '']]
III	92543	T	['C']	{'T', 'C'}	0.0659341	0.968085	TRUE	FALSE	TRUE	0.123854	91	0	6	85	[['C', 'synonymous_variant', 'LOW', 'pat-4', 'WBGene00003931', 'transcript', 'C29F9.7', 'protein_coding', '4/8', 'c.594A>G', 'p.Thr198Thr', '600/1597', '594/1401', '198/466', '', '']]
III	92546	G	['A']	{'A', 'G'}	0.0659341	0.968085	TRUE	FALSE	TRUE	0.123854	91	0	6	85	[['A', 'synonymous_variant', 'LOW', 'pat-4', 'WBGene00003931', 'transcript', 'C29F9.7', 'protein_coding', '4/8', 'c.591C>T', 'p.Ala197Ala', '597/1597', '591/1401', '197/466', '', '']]
III	92570	A	['C', 'G']	{'A', 'C'}	0.0659341	0.968085	TRUE	FALSE	FALSE	0.123854	91	0	6	85	[['C', 'synonymous_variant', 'LOW', 'pat-4', 'WBGene00003931', 'transcript', 'C29F9.7', 'protein_coding', '4/8', 'c.567T>G', 'p.Gly189Gly', '573/1597', '567/1401', '189/466', '', ''], ['G', 'synonymous_variant', 'LOW', 'pat-4', 'WBGene00003931', 'transcript', 'C29F9.7', 'protein_coding', '4/8', 'c.567T>C', 'p.Gly189Gly', '573/1597', '567/1401', '189/466', '', '']]
III	92591	G	['A']	{'A', 'G'}	0.0659341	0.968085	TRUE	FALSE	TRUE	0.123854	91	0	6	85	[['A', 'synonymous_variant', 'LOW', 'pat-4', 'WBGene00003931', 'transcript', 'C29F9.7', 'protein_coding', '4/8', 'c.546C>T', 'p.Phe182Phe', '552/1597', '546/1401', '182/466', '', '']]
III	92606	A	['G']	{'A', 'G'}	0.0659341	0.968085	TRUE	FALSE	TRUE	0.123854	91	0	6	85	[['G', 'synonymous_variant', 'LOW', 'pat-4', 'WBGene00003931', 'transcript', 'C29F9.7', 'protein_coding', '4/8', 'c.531T>C', 'p.Asn177Asn', '537/1597', '531/1401', '177/466', '', '']]
III	92621	A	['G']	{'A', 'G'}	0.0659341	0.968085	TRUE	FALSE	TRUE	0.123854	91	0	6	85	[['G', 'synonymous_variant', 'LOW', 'pat-4', 'WBGene00003931', 'transcript', 'C29F9.7', 'protein_coding', '4/8', 'c.516T>C', 'p.His172His', '522/1597', '516/1401', '172/466', '', '']]
III	92640	A	['G']	{'A', 'G'}	0.0444444	0.957447	TRUE	FALSE	TRUE	0.0854128	90	0	4	86	[['G', 'splice_region_variant&intron_variant', 'LOW', 'pat-4', 'WBGene00003931', 'transcript', 'C29F9.7', 'protein_coding', '3/7', 'c.500-3T>C', '', '', '', '', '', '']]
III	92655	T	['A']	{'T', 'A'}	0.0659341	0.968085	TRUE	FALSE	FALSE	0.123854	91	0	6	85	[['A', 'intron_variant', 'MODIFIER', 'pat-4', 'WBGene00003931', 'transcript', 'C29F9.7', 'protein_coding', '3/7', 'c.500-18A>T', '', '', '', '', '', '']]
III	92688	A	['T']	{'T', 'A'}	0.0344828	0.925532	TRUE	FALSE	FALSE	0.0669723	87	0	3	84	[['T', 'intron_variant', 'MODIFIER', 'pat-4', 'WBGene00003931', 'transcript', 'C29F9.7', 'protein_coding', '3/7', 'c.500-51T>A', '', '', '', '', '', '']]
III	92694	A	['T']	{'T', 'A'}	0.0352941	0.904255	TRUE	FALSE	FALSE	0.0684998	85	0	3	82	[['T', 'intron_variant', 'MODIFIER', 'pat-4', 'WBGene00003931', 'transcript', 'C29F9.7', 'protein_coding', '3/7', 'c.500-57T>A', '', '', '', '', '', '']]
III	92695	C	['T']	{'T', 'C'}	0.0352941	0.904255	TRUE	FALSE	TRUE	0.0684998	85	0	3	82	[['T', 'intron_variant', 'MODIFIER', 'pat-4', 'WBGene00003931', 'transcript', 'C29F9.7', 'protein_coding', '3/7', 'c.500-58G>A', '', '', '', '', '', '']]
III	92735	A	['C']	{'A', 'C'}	0.0659341	0.968085	TRUE	FALSE	FALSE	0.123854	91	0	6	85	[['C', 'intron_variant', 'MODIFIER', 'pat-4', 'WBGene00003931', 'transcript', 'C29F9.7', 'protein_coding', '3/7', 'c.500-98T>G', '', '', '', '', '', '']]
III	92744	C	['G']	{'G', 'C'}	0.0659341	0.968085	TRUE	FALSE	FALSE	0.123854	91	0	6	85	[['G', 'intron_variant', 'MODIFIER', 'pat-4', 'WBGene00003931', 'transcript', 'C29F9.7', 'protein_coding', '3/7', 'c.500-107G>C', '', '', '', '', '', '']]
III	92749	T	['A']	{'T', 'A'}	0.0659341	0.968085	TRUE	FALSE	FALSE	0.123854	91	0	6	85	[['A', 'intron_variant', 'MODIFIER', 'pat-4', 'WBGene00003931', 'transcript', 'C29F9.7', 'protein_coding', '3/7', 'c.500-112A>T', '', '', '', '', '', '']]
III	92751	T	['A']	{'T', 'A'}	0.0659341	0.968085	TRUE	FALSE	FALSE	0.123854	91	0	6	85	[['A', 'intron_variant', 'MODIFIER', 'pat-4', 'WBGene00003931', 'transcript', 'C29F9.7', 'protein_coding', '3/7', 'c.500-114A>T', '', '', '', '', '', '']]
III	92761	T	['A']	{'T', 'A'}	0.0549451	0.968085	TRUE	FALSE	FALSE	0.104426	91	0	5	86	[['A', 'intron_variant', 'MODIFIER', 'pat-4', 'WBGene00003931', 'transcript', 'C29F9.7', 'protein_coding', '3/7', 'c.500-124A>T', '', '', '', '', '', '']]
III	92775	T	['G']	{'T', 'G'}	0.120879	0.968085	TRUE	FALSE	FALSE	0.213709	91	0	11	80	[['G', 'intron_variant', 'MODIFIER', 'pat-4', 'WBGene00003931', 'transcript', 'C29F9.7', 'protein_coding', '3/7', 'c.500-138A>C', '', '', '', '', '', '']]
III	92793	T	['A']	{'T', 'A'}	0.120879	0.968085	TRUE	FALSE	FALSE	0.213709	91	0	11	80	[['A', 'intron_variant', 'MODIFIER', 'pat-4', 'WBGene00003931', 'transcript', 'C29F9.7', 'protein_coding', '3/7', 'c.500-156A>T', '', '', '', '', '', '']]
III	92810	C	['T']	{'T', 'C'}	0.0659341	0.968085	TRUE	FALSE	TRUE	0.123854	91	0	6	85	[['T', 'intron_variant', 'MODIFIER', 'pat-4', 'WBGene00003931', 'transcript', 'C29F9.7', 'protein_coding', '3/7', 'c.500-173G>A', '', '', '', '', '', '']]
III	92860	G	['C']	{'G', 'C'}	0.0581395	0.914894	TRUE	FALSE	FALSE	0.110159	86	0	5	81	[['C', 'intron_variant', 'MODIFIER', 'pat-4', 'WBGene00003931', 'transcript', 'C29F9.7', 'protein_coding', '3/7', 'c.500-223C>G', '', '', '', '', '', '']]
III	92864	T	['C']	{'T', 'C'}	0.0581395	0.914894	TRUE	FALSE	TRUE	0.110159	86	0	5	81	[['C', 'intron_variant', 'MODIFIER', 'pat-4', 'WBGene00003931', 'transcript', 'C29F9.7', 'protein_coding', '3/7', 'c.500-227A>G', '', '', '', '', '', '']]
III	92878	T	['C']	{'T', 'C'}	0.0581395	0.914894	TRUE	FALSE	TRUE	0.110159	86	0	5	81	[['C', 'intron_variant', 'MODIFIER', 'pat-4', 'WBGene00003931', 'transcript', 'C29F9.7', 'protein_coding', '3/7', 'c.500-241A>G', '', '', '', '', '', '']]
III	92881	A	['G']	{'A', 'G'}	0.0581395	0.914894	TRUE	FALSE	TRUE	0.110159	86	0	5	81	[['G', 'intron_variant', 'MODIFIER', 'pat-4', 'WBGene00003931', 'transcript', 'C29F9.7', 'protein_coding', '3/7', 'c.500-244T>C', '', '', '', '', '', '']]
III	92999	G	['A']	{'A', 'G'}	0.120879	0.968085	TRUE	FALSE	TRUE	0.213709	91	0	11	80	[['A', 'intron_variant', 'MODIFIER', 'pat-4', 'WBGene00003931', 'transcript', 'C29F9.7', 'protein_coding', '3/7', 'c.499+135C>T', '', '', '', '', '', '']]
III	93012	T	['A']	{'T', 'A'}	0.0549451	0.968085	TRUE	FALSE	FALSE	0.104426	91	0	5	86	[['A', 'intron_variant', 'MODIFIER', 'pat-4', 'WBGene00003931', 'transcript', 'C29F9.7', 'protein_coding', '3/7', 'c.499+122A>T', '', '', '', '', '', '']]
III	93015	A	['G']	{'A', 'G'}	0.0549451	0.968085	TRUE	FALSE	TRUE	0.104426	91	0	5	86	[['G', 'intron_variant', 'MODIFIER', 'pat-4', 'WBGene00003931', 'transcript', 'C29F9.7', 'protein_coding', '3/7', 'c.499+119T>C', '', '', '', '', '', '']]
III	93021	G	['T']	{'T', 'G'}	0.120879	0.968085	TRUE	FALSE	FALSE	0.213709	91	0	11	80	[['T', 'intron_variant', 'MODIFIER', 'pat-4', 'WBGene00003931', 'transcript', 'C29F9.7', 'protein_coding', '3/7', 'c.499+113C>A', '', '', '', '', '', '']]
III	93088	G	['A']	{'A', 'G'}	0.0568182	0.93617	TRUE	FALSE	TRUE	0.107792	88	0	5	83	[['A', 'intron_variant', 'MODIFIER', 'pat-4', 'WBGene00003931', 'transcript', 'C29F9.7', 'protein_coding', '3/7', 'c.499+46C>T', '', '', '', '', '', '']]
III	93092	A	['C']	{'A', 'C'}	0.0561798	0.946809	TRUE	FALSE	FALSE	0.106646	89	0	5	84	[['C', 'intron_variant', 'MODIFIER', 'pat-4', 'WBGene00003931', 'transcript', 'C29F9.7', 'protein_coding', '3/7', 'c.499+42T>G', '', '', '', '', '', '']]
III	93110	G	['C', 'A']	{'G', 'C'}	0.0561798	0.946809	TRUE	FALSE	FALSE	0.106646	89	0	5	84	[['A', 'intron_variant', 'MODIFIER', 'pat-4', 'WBGene00003931', 'transcript', 'C29F9.7', 'protein_coding', '3/7', 'c.499+24C>T', '', '', '', '', '', ''], ['C', 'intron_variant', 'MODIFIER', 'pat-4', 'WBGene00003931', 'transcript', 'C29F9.7', 'protein_coding', '3/7', 'c.499+24C>G', '', '', '', '', '', '']]
III	93131	T	['C']	{'T', 'C'}	0.120879	0.968085	TRUE	FALSE	TRUE	0.213709	91	0	11	80	[['C', 'splice_region_variant&intron_variant', 'LOW', 'pat-4', 'WBGene00003931', 'transcript', 'C29F9.7', 'protein_coding', '3/7', 'c.499+3A>G', '', '', '', '', '', '']]
III	93138	A	['T']	{'T', 'A'}	0.0659341	0.968085	TRUE	FALSE	FALSE	0.123854	91	0	6	85	[['T', 'synonymous_variant', 'LOW', 'pat-4', 'WBGene00003931', 'transcript', 'C29F9.7', 'protein_coding', '3/8', 'c.495T>A', 'p.Ile165Ile', '501/1597', '495/1401', '165/466', '', '']]
III	93144	G	['A']	{'A', 'G'}	0.0659341	0.968085	TRUE	FALSE	TRUE	0.123854	91	0	6	85	[['A', 'synonymous_variant', 'LOW', 'pat-4', 'WBGene00003931', 'transcript', 'C29F9.7', 'protein_coding', '3/8', 'c.489C>T', 'p.Asn163Asn', '495/1597', '489/1401', '163/466', '', '']]
III	93171	C	['A', 'T']	{'T', 'A', 'C'}	0.0769231	0.968085	TRUE	FALSE	FALSE	0.142796	91	0	7	84	[['A', 'synonymous_variant', 'LOW', 'pat-4', 'WBGene00003931', 'transcript', 'C29F9.7', 'protein_coding', '3/8', 'c.462G>T', 'p.Leu154Leu', '468/1597', '462/1401', '154/466', '', ''], ['T', 'synonymous_variant', 'LOW', 'pat-4', 'WBGene00003931', 'transcript', 'C29F9.7', 'protein_coding', '3/8', 'c.462G>A', 'p.Leu154Leu', '468/1597', '462/1401', '154/466', '', '']]
III	93174	T	['C']	{'T', 'C'}	0.0659341	0.968085	TRUE	FALSE	TRUE	0.123854	91	0	6	85	[['C', 'synonymous_variant', 'LOW', 'pat-4', 'WBGene00003931', 'transcript', 'C29F9.7', 'protein_coding', '3/8', 'c.459A>G', 'p.Pro153Pro', '465/1597', '459/1401', '153/466', '', '']]
III	93183	T	['C']	{'T', 'C'}	0.0549451	0.968085	TRUE	FALSE	TRUE	0.104426	91	0	5	86	[['C', 'synonymous_variant', 'LOW', 'pat-4', 'WBGene00003931', 'transcript', 'C29F9.7', 'protein_coding', '3/8', 'c.450A>G', 'p.Gly150Gly', '456/1597', '450/1401', '150/466', '', '']]
III	93195	G	['A']	{'A', 'G'}	0.0549451	0.968085	TRUE	FALSE	TRUE	0.104426	91	0	5	86	[['A', 'synonymous_variant', 'LOW', 'pat-4', 'WBGene00003931', 'transcript', 'C29F9.7', 'protein_coding', '3/8', 'c.438C>T', 'p.Cys146Cys', '444/1597', '438/1401', '146/466', '', '']]
III	93210	G	['A']	{'A', 'G'}	0.0549451	0.968085	TRUE	FALSE	TRUE	0.104426	91	0	5	86	[['A', 'synonymous_variant', 'LOW', 'pat-4', 'WBGene00003931', 'transcript', 'C29F9.7', 'protein_coding', '3/8', 'c.423C>T', 'p.Ala141Ala', '429/1597', '423/1401', '141/466', '', '']]
III	93236	G	['A']	{'A', 'G'}	0.0588235	0.904255	TRUE	FALSE	TRUE	0.111382	85	0	5	80	[['A', 'splice_region_variant&intron_variant', 'LOW', 'pat-4', 'WBGene00003931', 'transcript', 'C29F9.7', 'protein_coding', '2/7', 'c.403-6C>T', '', '', '', '', '', '']]
III	93299	T	['C']	{'T', 'C'}	0.0659341	0.968085	TRUE	FALSE	TRUE	0.123854	91	0	6	85	[['C', 'intron_variant', 'MODIFIER', 'pat-4', 'WBGene00003931', 'transcript', 'C29F9.7', 'protein_coding', '2/7', 'c.403-69A>G', '', '', '', '', '', '']]
III	93303	A	['G']	{'A', 'G'}	0.0659341	0.968085	TRUE	FALSE	TRUE	0.123854	91	0	6	85	[['G', 'intron_variant', 'MODIFIER', 'pat-4', 'WBGene00003931', 'transcript', 'C29F9.7', 'protein_coding', '2/7', 'c.403-73T>C', '', '', '', '', '', '']]
III	93321	C	['T']	{'T', 'C'}	0.0659341	0.968085	TRUE	FALSE	TRUE	0.123854	91	0	6	85	[['T', 'intron_variant', 'MODIFIER', 'pat-4', 'WBGene00003931', 'transcript', 'C29F9.7', 'protein_coding', '2/7', 'c.403-91G>A', '', '', '', '', '', '']]
III	93322	G	['A']	{'A', 'G'}	0.0659341	0.968085	TRUE	FALSE	TRUE	0.123854	91	0	6	85	[['A', 'intron_variant', 'MODIFIER', 'pat-4', 'WBGene00003931', 'transcript', 'C29F9.7', 'protein_coding', '2/7', 'c.403-92C>T', '', '', '', '', '', '']]
III	93330	A	['G']	{'A', 'G'}	0.0659341	0.968085	TRUE	FALSE	TRUE	0.123854	91	0	6	85	[['G', 'intron_variant', 'MODIFIER', 'pat-4', 'WBGene00003931', 'transcript', 'C29F9.7', 'protein_coding', '2/7', 'c.403-100T>C', '', '', '', '', '', '']]
III	93339	C	['A']	{'A', 'C'}	0.0659341	0.968085	TRUE	FALSE	FALSE	0.123854	91	0	6	85	[['A', 'intron_variant', 'MODIFIER', 'pat-4', 'WBGene00003931', 'transcript', 'C29F9.7', 'protein_coding', '2/7', 'c.403-109G>T', '', '', '', '', '', '']]
III	93344	T	['A']	{'T', 'A'}	0.0659341	0.968085	TRUE	FALSE	FALSE	0.123854	91	0	6	85	[['A', 'intron_variant', 'MODIFIER', 'pat-4', 'WBGene00003931', 'transcript', 'C29F9.7', 'protein_coding', '2/7', 'c.403-114A>T', '', '', '', '', '', '']]
III	93368	C	['T']	{'T', 'C'}	0.0659341	0.968085	TRUE	FALSE	TRUE	0.123854	91	0	6	85	[['T', 'intron_variant', 'MODIFIER', 'pat-4', 'WBGene00003931', 'transcript', 'C29F9.7', 'protein_coding', '2/7', 'c.403-138G>A', '', '', '', '', '', '']]
III	93375	A	['G']	{'A', 'G'}	0.010989	0.968085	TRUE	FALSE	TRUE	0.0218566	91	0	1	90	[['G', 'intron_variant', 'MODIFIER', 'pat-4', 'WBGene00003931', 'transcript', 'C29F9.7', 'protein_coding', '2/7', 'c.403-145T>C', '', '', '', '', '', '']]
III	93429	G	['A']	{'A', 'G'}	0.0555556	0.957447	TRUE	FALSE	TRUE	0.105525	90	0	5	85	[['A', 'intron_variant', 'MODIFIER', 'pat-4', 'WBGene00003931', 'transcript', 'C29F9.7', 'protein_coding', '2/7', 'c.403-199C>T', '', '', '', '', '', '']]
III	93437	A	['T']	{'T', 'A'}	0.0555556	0.957447	TRUE	FALSE	FALSE	0.105525	90	0	5	85	[['T', 'intron_variant', 'MODIFIER', 'pat-4', 'WBGene00003931', 'transcript', 'C29F9.7', 'protein_coding', '2/7', 'c.403-207T>A', '', '', '', '', '', '']]
III	93440	A	['G']	{'A', 'G'}	0.0111111	0.957447	TRUE	FALSE	TRUE	0.0220981	90	0	1	89	[['G', 'intron_variant', 'MODIFIER', 'pat-4', 'WBGene00003931', 'transcript', 'C29F9.7', 'protein_coding', '2/7', 'c.403-210T>C', '', '', '', '', '', '']]
III	93455	G	['A']	{'A', 'G'}	0.0555556	0.957447	TRUE	FALSE	TRUE	0.105525	90	0	5	85	[['A', 'intron_variant', 'MODIFIER', 'pat-4', 'WBGene00003931', 'transcript', 'C29F9.7', 'protein_coding', '2/7', 'c.403-225C>T', '', '', '', '', '', '']]
III	93490	C	['T']	{'T', 'C'}	0.0555556	0.957447	TRUE	FALSE	TRUE	0.105525	90	0	5	85	[['T', 'intron_variant', 'MODIFIER', 'pat-4', 'WBGene00003931', 'transcript', 'C29F9.7', 'protein_coding', '2/7', 'c.403-260G>A', '', '', '', '', '', '']]
III	93499	TAA	['T']	{'T', 'TAA'}	0.0111111	0.957447	FALSE	TRUE	FALSE	0.0220981	90	0	1	89	[['T', 'intron_variant', 'MODIFIER', 'pat-4', 'WBGene00003931', 'transcript', 'C29F9.7', 'protein_coding', '2/7', 'c.403-271_403-270delTT', '', '', '', '', '', '']]
III	93517	A	['T']	{'T', 'A'}	0.0449438	0.946809	TRUE	FALSE	FALSE	0.0863328	89	0	4	85	[['T', 'intron_variant', 'MODIFIER', 'pat-4', 'WBGene00003931', 'transcript', 'C29F9.7', 'protein_coding', '2/7', 'c.403-287T>A', '', '', '', '', '', '']]
III	93539	C	['T']	{'T', 'C'}	0.0555556	0.957447	TRUE	FALSE	TRUE	0.105525	90	0	5	85	[['T', 'intron_variant', 'MODIFIER', 'pat-4', 'WBGene00003931', 'transcript', 'C29F9.7', 'protein_coding', '2/7', 'c.402+301G>A', '', '', '', '', '', '']]
III	93580	C	['G']	{'G', 'C'}	0.10989	0.968085	TRUE	FALSE	FALSE	0.196709	91	0	10	81	[['G', 'intron_variant', 'MODIFIER', 'pat-4', 'WBGene00003931', 'transcript', 'C29F9.7', 'protein_coding', '2/7', 'c.402+260G>C', '', '', '', '', '', '']]
III	93586	T	['A']	{'T', 'A'}	0.10989	0.968085	TRUE	FALSE	FALSE	0.196709	91	0	10	81	[['A', 'intron_variant', 'MODIFIER', 'pat-4', 'WBGene00003931', 'transcript', 'C29F9.7', 'protein_coding', '2/7', 'c.402+254A>T', '', '', '', '', '', '']]
III	93589	T	['G']	{'T', 'G'}	0.0549451	0.968085	TRUE	FALSE	FALSE	0.104426	91	0	5	86	[['G', 'intron_variant', 'MODIFIER', 'pat-4', 'WBGene00003931', 'transcript', 'C29F9.7', 'protein_coding', '2/7', 'c.402+251A>C', '', '', '', '', '', '']]
III	93638	A	['T']	{'T', 'A'}	0.0549451	0.968085	TRUE	FALSE	FALSE	0.104426	91	0	5	86	[['T', 'intron_variant', 'MODIFIER', 'pat-4', 'WBGene00003931', 'transcript', 'C29F9.7', 'protein_coding', '2/7', 'c.402+202T>A', '', '', '', '', '', '']]
III	93651	T	['A']	{'T', 'A'}	0.0549451	0.968085	TRUE	FALSE	FALSE	0.104426	91	0	5	86	[['A', 'intron_variant', 'MODIFIER', 'pat-4', 'WBGene00003931', 'transcript', 'C29F9.7', 'protein_coding', '2/7', 'c.402+189A>T', '', '', '', '', '', '']]
III	93660	C	['A']	{'A', 'C'}	0.0549451	0.968085	TRUE	FALSE	FALSE	0.104426	91	0	5	86	[['A', 'intron_variant', 'MODIFIER', 'pat-4', 'WBGene00003931', 'transcript', 'C29F9.7', 'protein_coding', '2/7', 'c.402+180G>T', '', '', '', '', '', '']]
III	93698	T	['A']	{'T', 'A'}	0.021978	0.968085	TRUE	FALSE	FALSE	0.0432275	91	0	2	89	[['A', 'intron_variant', 'MODIFIER', 'pat-4', 'WBGene00003931', 'transcript', 'C29F9.7', 'protein_coding', '2/7', 'c.402+142A>T', '', '', '', '', '', '']]
III	93752	C	['T']	{'T', 'C'}	0.0549451	0.968085	TRUE	FALSE	TRUE	0.104426	91	0	5	86	[['T', 'intron_variant', 'MODIFIER', 'pat-4', 'WBGene00003931', 'transcript', 'C29F9.7', 'protein_coding', '2/7', 'c.402+88G>A', '', '', '', '', '', '']]
III	93828	C	['T']	{'T', 'C'}	0.032967	0.968085	TRUE	FALSE	TRUE	0.0641127	91	0	3	88	[['T', 'intron_variant', 'MODIFIER', 'pat-4', 'WBGene00003931', 'transcript', 'C29F9.7', 'protein_coding', '2/7', 'c.402+12G>A', '', '', '', '', '', '']]
III	93870	A	['T', 'G']	{'T', 'A'}	0.0659341	0.968085	TRUE	FALSE	FALSE	0.123854	91	0	6	85	[['G', 'synonymous_variant', 'LOW', 'pat-4', 'WBGene00003931', 'transcript', 'C29F9.7', 'protein_coding', '2/8', 'c.372T>C', 'p.Ala124Ala', '378/1597', '372/1401', '124/466', '', ''], ['T', 'synonymous_variant', 'LOW', 'pat-4', 'WBGene00003931', 'transcript', 'C29F9.7', 'protein_coding', '2/8', 'c.372T>A', 'p.Ala124Ala', '378/1597', '372/1401', '124/466', '', '']]
III	93882	T	['C']	{'T', 'C'}	0.0659341	0.968085	TRUE	FALSE	TRUE	0.123854	91	0	6	85	[['C', 'synonymous_variant', 'LOW', 'pat-4', 'WBGene00003931', 'transcript', 'C29F9.7', 'protein_coding', '2/8', 'c.360A>G', 'p.Pro120Pro', '366/1597', '360/1401', '120/466', '', '']]
III	93885	A	['T']	{'T', 'A'}	0.0659341	0.968085	TRUE	FALSE	FALSE	0.123854	91	0	6	85	[['T', 'synonymous_variant', 'LOW', 'pat-4', 'WBGene00003931', 'transcript', 'C29F9.7', 'protein_coding', '2/8', 'c.357T>A', 'p.Thr119Thr', '363/1597', '357/1401', '119/466', '', '']]
III	93918	G	['A']	{'A', 'G'}	0.0659341	0.968085	TRUE	FALSE	TRUE	0.123854	91	0	6	85	[['A', 'synonymous_variant', 'LOW', 'pat-4', 'WBGene00003931', 'transcript', 'C29F9.7', 'protein_coding', '2/8', 'c.324C>T', 'p.Ala108Ala', '330/1597', '324/1401', '108/466', '', '']]
III	93921	T	['C']	{'T', 'C'}	0.0659341	0.968085	TRUE	FALSE	TRUE	0.123854	91	0	6	85	[['C', 'synonymous_variant', 'LOW', 'pat-4', 'WBGene00003931', 'transcript', 'C29F9.7', 'protein_coding', '2/8', 'c.321A>G', 'p.Lys107Lys', '327/1597', '321/1401', '107/466', '', '']]
III	93954	G	['A']	{'A', 'G'}	0.0549451	0.968085	TRUE	FALSE	TRUE	0.104426	91	0	5	86	[['A', 'synonymous_variant', 'LOW', 'pat-4', 'WBGene00003931', 'transcript', 'C29F9.7', 'protein_coding', '2/8', 'c.288C>T', 'p.His96His', '294/1597', '288/1401', '96/466', '', '']]
III	93969	C	['T']	{'T', 'C'}	0.0659341	0.968085	TRUE	FALSE	TRUE	0.123854	91	0	6	85	[['T', 'synonymous_variant', 'LOW', 'pat-4', 'WBGene00003931', 'transcript', 'C29F9.7', 'protein_coding', '2/8', 'c.273G>A', 'p.Ala91Ala', '279/1597', '273/1401', '91/466', '', '']]
III	93974	A	['G']	{'A', 'G'}	0.0659341	0.968085	TRUE	FALSE	TRUE	0.123854	91	0	6	85	[['G', 'synonymous_variant', 'LOW', 'pat-4', 'WBGene00003931', 'transcript', 'C29F9.7', 'protein_coding', '2/8', 'c.268T>C', 'p.Leu90Leu', '274/1597', '268/1401', '90/466', '', '']]
III	94002	C	['T']	{'T', 'C'}	0.0659341	0.968085	TRUE	FALSE	TRUE	0.123854	91	0	6	85	[['T', 'synonymous_variant', 'LOW', 'pat-4', 'WBGene00003931', 'transcript', 'C29F9.7', 'protein_coding', '2/8', 'c.240G>A', 'p.Thr80Thr', '246/1597', '240/1401', '80/466', '', '']]
III	94047	C	['T']	{'T', 'C'}	0.0659341	0.968085	TRUE	FALSE	TRUE	0.123854	91	0	6	85	[['T', 'synonymous_variant', 'LOW', 'pat-4', 'WBGene00003931', 'transcript', 'C29F9.7', 'protein_coding', '2/8', 'c.195G>A', 'p.Ala65Ala', '201/1597', '195/1401', '65/466', '', '']]
III	94067	C	['A']	{'A', 'C'}	0.0659341	0.968085	TRUE	FALSE	FALSE	0.123854	91	0	6	85	[['A', 'missense_variant', 'MODERATE', 'pat-4', 'WBGene00003931', 'transcript', 'C29F9.7', 'protein_coding', '2/8', 'c.175G>T', 'p.Ala59Ser', '181/1597', '175/1401', '59/466', '', '']]
III	94080	C	['T']	{'T', 'C'}	0.0659341	0.968085	TRUE	FALSE	TRUE	0.123854	91	0	6	85	[['T', 'synonymous_variant', 'LOW', 'pat-4', 'WBGene00003931', 'transcript', 'C29F9.7', 'protein_coding', '2/8', 'c.162G>A', 'p.Leu54Leu', '168/1597', '162/1401', '54/466', '', '']]
III	94083	T	['G', 'A']	{'T', 'G'}	0.0659341	0.968085	TRUE	FALSE	FALSE	0.123854	91	0	6	85	[['A', 'synonymous_variant', 'LOW', 'pat-4', 'WBGene00003931', 'transcript', 'C29F9.7', 'protein_coding', '2/8', 'c.159A>T', 'p.Ser53Ser', '165/1597', '159/1401', '53/466', '', ''], ['G', 'synonymous_variant', 'LOW', 'pat-4', 'WBGene00003931', 'transcript', 'C29F9.7', 'protein_coding', '2/8', 'c.159A>C', 'p.Ser53Ser', '165/1597', '159/1401', '53/466', '', '']]
III	94133	A	['G']	{'A', 'G'}	0.120879	0.968085	TRUE	FALSE	TRUE	0.213709	91	0	11	80	[['G', 'synonymous_variant', 'LOW', 'pat-4', 'WBGene00003931', 'transcript', 'C29F9.7', 'protein_coding', '2/8', 'c.109T>C', 'p.Leu37Leu', '115/1597', '109/1401', '37/466', '', '']]
III	94140	G	['A', 'T']	{'A', 'G'}	0.120879	0.968085	TRUE	FALSE	FALSE	0.213709	91	0	11	80	[['A', 'synonymous_variant', 'LOW', 'pat-4', 'WBGene00003931', 'transcript', 'C29F9.7', 'protein_coding', '2/8', 'c.102C>T', 'p.Arg34Arg', '108/1597', '102/1401', '34/466', '', ''], ['T', 'synonymous_variant', 'LOW', 'pat-4', 'WBGene00003931', 'transcript', 'C29F9.7', 'protein_coding', '2/8', 'c.102C>A', 'p.Arg34Arg', '108/1597', '102/1401', '34/466', '', '']]
III	94165	C	['T']	{'T', 'C'}	0.0581395	0.914894	TRUE	FALSE	TRUE	0.110159	86	0	5	81	[['T', 'intron_variant', 'MODIFIER', 'pat-4', 'WBGene00003931', 'transcript', 'C29F9.7', 'protein_coding', '1/7', 'c.97-20G>A', '', '', '', '', '', '']]
III	94168	A	['G']	{'A', 'G'}	0.0581395	0.914894	TRUE	FALSE	TRUE	0.110159	86	0	5	81	[['G', 'intron_variant', 'MODIFIER', 'pat-4', 'WBGene00003931', 'transcript', 'C29F9.7', 'protein_coding', '1/7', 'c.97-23T>C', '', '', '', '', '', '']]
III	94170	T	['A']	{'T', 'A'}	0.0581395	0.914894	TRUE	FALSE	FALSE	0.110159	86	0	5	81	[['A', 'intron_variant', 'MODIFIER', 'pat-4', 'WBGene00003931', 'transcript', 'C29F9.7', 'protein_coding', '1/7', 'c.97-25A>T', '', '', '', '', '', '']]
III	94171	C	['T']	{'T', 'C'}	0.0581395	0.914894	TRUE	FALSE	TRUE	0.110159	86	0	5	81	[['T', 'intron_variant', 'MODIFIER', 'pat-4', 'WBGene00003931', 'transcript', 'C29F9.7', 'protein_coding', '1/7', 'c.97-26G>A', '', '', '', '', '', '']]
III	94175	A	['T']	{'T', 'A'}	0.0581395	0.914894	TRUE	FALSE	FALSE	0.110159	86	0	5	81	[['T', 'intron_variant', 'MODIFIER', 'pat-4', 'WBGene00003931', 'transcript', 'C29F9.7', 'protein_coding', '1/7', 'c.97-30T>A', '', '', '', '', '', '']]
III	94185	G	['A']	{'A', 'G'}	0.0581395	0.914894	TRUE	FALSE	TRUE	0.110159	86	0	5	81	[['A', 'intron_variant', 'MODIFIER', 'pat-4', 'WBGene00003931', 'transcript', 'C29F9.7', 'protein_coding', '1/7', 'c.97-40C>T', '', '', '', '', '', '']]
III	94187	G	['T']	{'T', 'G'}	0.0581395	0.914894	TRUE	FALSE	FALSE	0.110159	86	0	5	81	[['T', 'intron_variant', 'MODIFIER', 'pat-4', 'WBGene00003931', 'transcript', 'C29F9.7', 'protein_coding', '1/7', 'c.97-42C>A', '', '', '', '', '', '']]
III	94196	T	['G']	{'T', 'G'}	0.0581395	0.914894	TRUE	FALSE	FALSE	0.110159	86	0	5	81	[['G', 'intron_variant', 'MODIFIER', 'pat-4', 'WBGene00003931', 'transcript', 'C29F9.7', 'protein_coding', '1/7', 'c.97-51A>C', '', '', '', '', '', '']]
III	94319	A	['G']	{'A', 'G'}	0.0238095	0.893617	TRUE	FALSE	TRUE	0.0467636	84	0	2	82	[['G', 'intron_variant', 'MODIFIER', 'pat-4', 'WBGene00003931', 'transcript', 'C29F9.7', 'protein_coding', '1/7', 'c.97-174T>C', '', '', '', '', '', '']]
III	94365	G	['T']	{'T', 'G'}	0.0652174	0.978723	TRUE	FALSE	FALSE	0.122594	92	0	6	86	[['T', 'intron_variant', 'MODIFIER', 'pat-4', 'WBGene00003931', 'transcript', 'C29F9.7', 'protein_coding', '1/7', 'c.97-220C>A', '', '', '', '', '', '']]
III	94370	G	['A']	{'A', 'G'}	0.0652174	0.978723	TRUE	FALSE	TRUE	0.122594	92	0	6	86	[['A', 'intron_variant', 'MODIFIER', 'pat-4', 'WBGene00003931', 'transcript', 'C29F9.7', 'protein_coding', '1/7', 'c.97-225C>T', '', '', '', '', '', '']]
III	94413	AT	['A']	{'A', 'AT'}	0.0111111	0.957447	FALSE	TRUE	FALSE	0.0220981	90	0	1	89	[['A', 'intron_variant', 'MODIFIER', 'pat-4', 'WBGene00003931', 'transcript', 'C29F9.7', 'protein_coding', '1/7', 'c.97-269delA', '', '', '', '', '', '']]
III	94433	T	['A']	{'T', 'A'}	0.0224719	0.946809	TRUE	FALSE	FALSE	0.0441821	89	0	2	87	[['A', 'intron_variant', 'MODIFIER', 'pat-4', 'WBGene00003931', 'transcript', 'C29F9.7', 'protein_coding', '1/7', 'c.96+275A>T', '', '', '', '', '', '']]
III	94439	AT	['A']	{'A', 'AT'}	0.102273	0.93617	FALSE	TRUE	FALSE	0.184675	88	0	9	79	[['A', 'intron_variant', 'MODIFIER', 'pat-4', 'WBGene00003931', 'transcript', 'C29F9.7', 'protein_coding', '1/7', 'c.96+268delA', '', '', '', '', '', '']]
III	94449	T	['C']	{'T', 'C'}	0.0879121	0.968085	TRUE	FALSE	TRUE	0.161253	91	0	8	83	[['C', 'intron_variant', 'MODIFIER', 'pat-4', 'WBGene00003931', 'transcript', 'C29F9.7', 'protein_coding', '1/7', 'c.96+259A>G', '', '', '', '', '', '']]
III	94450	A	['T']	{'T', 'A'}	0.0543478	0.978723	TRUE	FALSE	FALSE	0.10335	92	0	5	87	[['T', 'intron_variant', 'MODIFIER', 'pat-4', 'WBGene00003931', 'transcript', 'C29F9.7', 'protein_coding', '1/7', 'c.96+258T>A', '', '', '', '', '', '']]
III	94453	A	['C']	{'A', 'C'}	0.0543478	0.978723	TRUE	FALSE	FALSE	0.10335	92	0	5	87	[['C', 'intron_variant', 'MODIFIER', 'pat-4', 'WBGene00003931', 'transcript', 'C29F9.7', 'protein_coding', '1/7', 'c.96+255T>G', '', '', '', '', '', '']]
III	94474	A	['T']	{'T', 'A'}	0.0555556	0.957447	TRUE	FALSE	FALSE	0.105525	90	0	5	85	[['T', 'intron_variant', 'MODIFIER', 'pat-4', 'WBGene00003931', 'transcript', 'C29F9.7', 'protein_coding', '1/7', 'c.96+234T>A', '', '', '', '', '', '']]
III	94530	A	['G']	{'A', 'G'}	0.0549451	0.968085	TRUE	FALSE	TRUE	0.104426	91	0	5	86	[['G', 'intron_variant', 'MODIFIER', 'pat-4', 'WBGene00003931', 'transcript', 'C29F9.7', 'protein_coding', '1/7', 'c.96+178T>C', '', '', '', '', '', '']]
III	94535	C	['G']	{'G', 'C'}	0.0989011	0.968085	TRUE	FALSE	FALSE	0.179224	91	0	9	82	[['G', 'intron_variant', 'MODIFIER', 'pat-4', 'WBGene00003931', 'transcript', 'C29F9.7', 'protein_coding', '1/7', 'c.96+173G>C', '', '', '', '', '', '']]
III	94546	C	['T']	{'T', 'C'}	0.0549451	0.968085	TRUE	FALSE	TRUE	0.104426	91	0	5	86	[['T', 'intron_variant', 'MODIFIER', 'pat-4', 'WBGene00003931', 'transcript', 'C29F9.7', 'protein_coding', '1/7', 'c.96+162G>A', '', '', '', '', '', '']]
III	94574	T	['A']	{'T', 'A'}	0.0574713	0.925532	TRUE	FALSE	FALSE	0.108963	87	0	5	82	[['A', 'intron_variant', 'MODIFIER', 'pat-4', 'WBGene00003931', 'transcript', 'C29F9.7', 'protein_coding', '1/7', 'c.96+134A>T', '', '', '', '', '', '']]
III	94576	G	['C']	{'G', 'C'}	0.0574713	0.925532	TRUE	FALSE	FALSE	0.108963	87	0	5	82	[['C', 'intron_variant', 'MODIFIER', 'pat-4', 'WBGene00003931', 'transcript', 'C29F9.7', 'protein_coding', '1/7', 'c.96+132C>G', '', '', '', '', '', '']]
III	94580	TA	['T']	{'TA', 'T'}	0.0344828	0.925532	FALSE	TRUE	FALSE	0.0669723	87	0	3	84	[['T', 'intron_variant', 'MODIFIER', 'pat-4', 'WBGene00003931', 'transcript', 'C29F9.7', 'protein_coding', '1/7', 'c.96+127delT', '', '', '', '', '', '']]
III	94600	C	['A']	{'A', 'C'}	0.0574713	0.925532	TRUE	FALSE	FALSE	0.108963	87	0	5	82	[['A', 'intron_variant', 'MODIFIER', 'pat-4', 'WBGene00003931', 'transcript', 'C29F9.7', 'protein_coding', '1/7', 'c.96+108G>T', '', '', '', '', '', '']]
III	94632	A	['AG']	{'A', 'AG'}	0.0326087	0.978723	FALSE	TRUE	FALSE	0.0634355	92	0	3	89	[['AG', 'intron_variant', 'MODIFIER', 'pat-4', 'WBGene00003931', 'transcript', 'C29F9.7', 'protein_coding', '1/7', 'c.96+75_96+76insC', '', '', '', '', '', '']]
III	94638	C	['T']	{'T', 'C'}	0.0652174	0.978723	TRUE	FALSE	TRUE	0.122594	92	0	6	86	[['T', 'intron_variant', 'MODIFIER', 'pat-4', 'WBGene00003931', 'transcript', 'C29F9.7', 'protein_coding', '1/7', 'c.96+70G>A', '', '', '', '', '', '']]
III	94647	A	['G']	{'A', 'G'}	0.0652174	0.978723	TRUE	FALSE	TRUE	0.122594	92	0	6	86	[['G', 'intron_variant', 'MODIFIER', 'pat-4', 'WBGene00003931', 'transcript', 'C29F9.7', 'protein_coding', '1/7', 'c.96+61T>C', '', '', '', '', '', '']]
III	94648	T	['G']	{'T', 'G'}	0.0543478	0.978723	TRUE	FALSE	FALSE	0.10335	92	0	5	87	[['G', 'intron_variant', 'MODIFIER', 'pat-4', 'WBGene00003931', 'transcript', 'C29F9.7', 'protein_coding', '1/7', 'c.96+60A>C', '', '', '', '', '', '']]
III	94659	C	['T']	{'T', 'C'}	0.0652174	0.978723	TRUE	FALSE	TRUE	0.122594	92	0	6	86	[['T', 'intron_variant', 'MODIFIER', 'pat-4', 'WBGene00003931', 'transcript', 'C29F9.7', 'protein_coding', '1/7', 'c.96+49G>A', '', '', '', '', '', '']]
III	94660	A	['G']	{'A', 'G'}	0.0652174	0.978723	TRUE	FALSE	TRUE	0.122594	92	0	6	86	[['G', 'intron_variant', 'MODIFIER', 'pat-4', 'WBGene00003931', 'transcript', 'C29F9.7', 'protein_coding', '1/7', 'c.96+48T>C', '', '', '', '', '', '']]
III	94673	G	['A']	{'A', 'G'}	0.0652174	0.978723	TRUE	FALSE	TRUE	0.122594	92	0	6	86	[['A', 'intron_variant', 'MODIFIER', 'pat-4', 'WBGene00003931', 'transcript', 'C29F9.7', 'protein_coding', '1/7', 'c.96+35C>T', '', '', '', '', '', '']]
III	94678	T	['C']	{'T', 'C'}	0.0652174	0.978723	TRUE	FALSE	TRUE	0.122594	92	0	6	86	[['C', 'intron_variant', 'MODIFIER', 'pat-4', 'WBGene00003931', 'transcript', 'C29F9.7', 'protein_coding', '1/7', 'c.96+30A>G', '', '', '', '', '', '']]
III	94679	A	['G']	{'A', 'G'}	0.0652174	0.978723	TRUE	FALSE	TRUE	0.122594	92	0	6	86	[['G', 'intron_variant', 'MODIFIER', 'pat-4', 'WBGene00003931', 'transcript', 'C29F9.7', 'protein_coding', '1/7', 'c.96+29T>C', '', '', '', '', '', '']]
III	94682	C	['T']	{'T', 'C'}	0.0543478	0.978723	TRUE	FALSE	TRUE	0.10335	92	0	5	87	[['T', 'intron_variant', 'MODIFIER', 'pat-4', 'WBGene00003931', 'transcript', 'C29F9.7', 'protein_coding', '1/7', 'c.96+26G>A', '', '', '', '', '', '']]
III	94684	C	['T']	{'T', 'C'}	0.0652174	0.978723	TRUE	FALSE	TRUE	0.122594	92	0	6	86	[['T', 'intron_variant', 'MODIFIER', 'pat-4', 'WBGene00003931', 'transcript', 'C29F9.7', 'protein_coding', '1/7', 'c.96+24G>A', '', '', '', '', '', '']]
III	94696	T	['G']	{'T', 'G'}	0.0652174	0.978723	TRUE	FALSE	FALSE	0.122594	92	0	6	86	[['G', 'intron_variant', 'MODIFIER', 'pat-4', 'WBGene00003931', 'transcript', 'C29F9.7', 'protein_coding', '1/7', 'c.96+12A>C', '', '', '', '', '', '']]
III	94744	A	['G']	{'A', 'G'}	0.0543478	0.978723	TRUE	FALSE	TRUE	0.10335	92	0	5	87	[['G', 'synonymous_variant', 'LOW', 'pat-4', 'WBGene00003931', 'transcript', 'C29F9.7', 'protein_coding', '1/8', 'c.60T>C', 'p.Asp20Asp', '66/1597', '60/1401', '20/466', '', '']]
III	94768	T	['C']	{'T', 'C'}	0.119565	0.978723	TRUE	FALSE	TRUE	0.211689	92	0	11	81	[['C', 'synonymous_variant', 'LOW', 'pat-4', 'WBGene00003931', 'transcript', 'C29F9.7', 'protein_coding', '1/8', 'c.36A>G', 'p.Pro12Pro', '42/1597', '36/1401', '12/466', '', '']]
III	94850	T	['TAA', 'TA']	{'TA', 'T', 'TAA'}	0.0574713	0.925532	FALSE	TRUE	FALSE	0.108963	87	0	5	82
III	94892	AAC	['A']	{'A', 'AAC'}	0.0568182	0.93617	FALSE	TRUE	FALSE	0.107792	88	0	5	83
III	94912	A	['G']	{'A', 'G'}	0.0114943	0.925532	TRUE	FALSE	TRUE	0.0228556	87	0	1	86
III	94956	A	['T']	{'T', 'A'}	0.0674157	0.946809	TRUE	FALSE	FALSE	0.126452	89	0	6	83
III	94958	T	['G']	{'T', 'G'}	0.0674157	0.946809	TRUE	FALSE	FALSE	0.126452	89	0	6	83
III	94962	A	['G']	{'A', 'G'}	0.0674157	0.946809	TRUE	FALSE	TRUE	0.126452	89	0	6	83
III	94983	C	['A']	{'A', 'C'}	0.0674157	0.946809	TRUE	FALSE	FALSE	0.126452	89	0	6	83
III	94989	C	['T']	{'T', 'C'}	0.0674157	0.946809	TRUE	FALSE	TRUE	0.126452	89	0	6	83
III	94992	G	['A']	{'A', 'G'}	0.0674157	0.946809	TRUE	FALSE	TRUE	0.126452	89	0	6	83
III	94999	A	['C']	{'A', 'C'}	0.0674157	0.946809	TRUE	FALSE	FALSE	0.126452	89	0	6	83
III	95009	G	['A', 'T']	{'A', 'G'}	0.0674157	0.946809	TRUE	FALSE	FALSE	0.126452	89	0	6	83
III	95031	A	['G']	{'A', 'G'}	0.0227273	0.93617	TRUE	FALSE	TRUE	0.0446753	88	0	2	86
III	95057	A	['T']	{'T', 'A'}	0.0652174	0.978723	TRUE	FALSE	FALSE	0.122594	92	0	6	86
III	95071	T	['G']	{'T', 'G'}	0.0652174	0.978723	TRUE	FALSE	FALSE	0.122594	92	0	6	86
III	95089	G	['T']	{'T', 'G'}	0.0326087	0.978723	TRUE	FALSE	FALSE	0.0634355	92	0	3	89
III	95090	T	['A', 'C']	{'T', 'A'}	0.0652174	0.978723	TRUE	FALSE	FALSE	0.122594	92	0	6	86
III	95108	A	['G']	{'A', 'G'}	0.119565	0.978723	TRUE	FALSE	TRUE	0.211689	92	0	11	81
III	95110	G	['A']	{'A', 'G'}	0.0652174	0.978723	TRUE	FALSE	TRUE	0.122594	92	0	6	86
III	95139	CCCCCG	['C']	{'C', 'CCCCCG'}	0.0434783	0.978723	FALSE	TRUE	FALSE	0.0836303	92	0	4	88
III	95142	CCGCT	['C']	{'C', 'CCGCT'}	0.0561798	0.946809	FALSE	TRUE	FALSE	0.106646	89	0	5	84
III	95143	C	['G']	{'G', 'C'}	0.0581395	0.914894	TRUE	FALSE	FALSE	0.110159	86	0	5	81
III	95146	T	['C']	{'T', 'C'}	0.0574713	0.925532	TRUE	FALSE	TRUE	0.108963	87	0	5	82
III	95151	A	['G']	{'A', 'G'}	0.0652174	0.978723	TRUE	FALSE	TRUE	0.122594	92	0	6	86
III	95153	G	['A']	{'A', 'G'}	0.0652174	0.978723	TRUE	FALSE	TRUE	0.122594	92	0	6	86
III	95168	A	['G']	{'A', 'G'}	0.0652174	0.978723	TRUE	FALSE	TRUE	0.122594	92	0	6	86
III	95170	T	['C', 'G']	{'T', 'G', 'C'}	0.119565	0.978723	TRUE	FALSE	FALSE	0.211689	92	0	11	81
III	95177	G	['T']	{'T', 'G'}	0.0108696	0.978723	TRUE	FALSE	FALSE	0.0216203	92	0	1	91
III	95190	C	['T']	{'T', 'C'}	0.0652174	0.978723	TRUE	FALSE	TRUE	0.122594	92	0	6	86
III	95191	A	['T']	{'T', 'A'}	0.0652174	0.978723	TRUE	FALSE	FALSE	0.122594	92	0	6	86
III	95195	C	['G']	{'G', 'C'}	0.0652174	0.978723	TRUE	FALSE	FALSE	0.122594	92	0	6	86
III	95227	A	['G']	{'A', 'G'}	0.0652174	0.978723	TRUE	FALSE	TRUE	0.122594	92	0	6	86
III	95246	A	['G']	{'A', 'G'}	0.0652174	0.978723	TRUE	FALSE	TRUE	0.122594	92	0	6	86
III	95262	G	['A']	{'A', 'G'}	0.0652174	0.978723	TRUE	FALSE	TRUE	0.122594	92	0	6	86
III	95268	G	['T']	{'T', 'G'}	0.0652174	0.978723	TRUE	FALSE	FALSE	0.122594	92	0	6	86
III	95269	T	['G']	{'T', 'G'}	0.0652174	0.978723	TRUE	FALSE	FALSE	0.122594	92	0	6	86
III	95271	G	['A']	{'A', 'G'}	0.0652174	0.978723	TRUE	FALSE	TRUE	0.122594	92	0	6	86
III	95277	C	['A']	{'A', 'C'}	0.0674157	0.946809	TRUE	FALSE	FALSE	0.126452	89	0	6	83
III	95277	CT	['C']	{'CT', 'C'}	0.0348837	0.914894	FALSE	TRUE	FALSE	0.0677275	86	0	3	83
III	95296	T	['C']	{'T', 'C'}	0.0549451	0.968085	TRUE	FALSE	TRUE	0.104426	91	0	5	86
III	95333	C	['T']	{'T', 'C'}	0.0549451	0.968085	TRUE	FALSE	TRUE	0.104426	91	0	5	86
III	95346	C	['T']	{'T', 'C'}	0.0652174	0.978723	TRUE	FALSE	TRUE	0.122594	92	0	6	86
III	95355	T	['C']	{'T', 'C'}	0.0543478	0.978723	TRUE	FALSE	TRUE	0.10335	92	0	5	87
III	95357	G	['A']	{'A', 'G'}	0.0217391	0.978723	TRUE	FALSE	TRUE	0.0427655	92	0	2	90
III	95360	T	['A']	{'T', 'A'}	0.0652174	0.978723	TRUE	FALSE	FALSE	0.122594	92	0	6	86
III	95365	A	['G']	{'A', 'G'}	0.0652174	0.978723	TRUE	FALSE	TRUE	0.122594	92	0	6	86
III	95380	G	['A']	{'A', 'G'}	0.0652174	0.978723	TRUE	FALSE	TRUE	0.122594	92	0	6	86
III	95382	G	['A']	{'A', 'G'}	0.0652174	0.978723	TRUE	FALSE	TRUE	0.122594	92	0	6	86
III	95387	C	['T']	{'T', 'C'}	0.0652174	0.978723	TRUE	FALSE	TRUE	0.122594	92	0	6	86
III	95405	C	['T']	{'T', 'C'}	0.0652174	0.978723	TRUE	FALSE	TRUE	0.122594	92	0	6	86	[['T', 'missense_variant', 'MODERATE', 'C29F9.8', 'WBGene00016222', 'transcript', 'C29F9.8', 'protein_coding', '8/8', 'c.754G>A', 'p.Val252Ile', '754/765', '754/765', '252/254', '', '']]
III	95431	AT	['A']	{'A', 'AT'}	0.0581395	0.914894	FALSE	TRUE	FALSE	0.110159	86	0	5	81	[['A', 'splice_region_variant&intron_variant', 'LOW', 'C29F9.8', 'WBGene00016222', 'transcript', 'C29F9.8', 'protein_coding', '7/7', 'c.735-8delA', '', '', '', '', '', '']]
III	95461	C	['T']	{'T', 'C'}	0.0652174	0.978723	TRUE	FALSE	TRUE	0.122594	92	0	6	86	[['T', 'intron_variant', 'MODIFIER', 'C29F9.8', 'WBGene00016222', 'transcript', 'C29F9.8', 'protein_coding', '7/7', 'c.734+22G>A', '', '', '', '', '', '']]
III	95467	C	['A']	{'A', 'C'}	0.0652174	0.978723	TRUE	FALSE	FALSE	0.122594	92	0	6	86	[['A', 'intron_variant', 'MODIFIER', 'C29F9.8', 'WBGene00016222', 'transcript', 'C29F9.8', 'protein_coding', '7/7', 'c.734+16G>T', '', '', '', '', '', '']]
III	95473	C	['T']	{'T', 'C'}	0.0652174	0.978723	TRUE	FALSE	TRUE	0.122594	92	0	6	86	[['T', 'intron_variant', 'MODIFIER', 'C29F9.8', 'WBGene00016222', 'transcript', 'C29F9.8', 'protein_coding', '7/7', 'c.734+10G>A', '', '', '', '', '', '']]
III	95485	T	['G']	{'T', 'G'}	0.0108696	0.978723	TRUE	FALSE	FALSE	0.0216203	92	0	1	91	[['G', 'missense_variant&splice_region_variant', 'MODERATE', 'C29F9.8', 'WBGene00016222', 'transcript', 'C29F9.8', 'protein_coding', '7/8', 'c.732A>C', 'p.Glu244Asp', '732/765', '732/765', '244/254', '', '']]
III	95545	A	['G']	{'A', 'G'}	0.0543478	0.978723	TRUE	FALSE	TRUE	0.10335	92	0	5	87	[['G', 'splice_region_variant&intron_variant', 'LOW', 'C29F9.8', 'WBGene00016222', 'transcript', 'C29F9.8', 'protein_coding', '6/7', 'c.678-6T>C', '', '', '', '', '', '']]
III	95582	A	['G']	{'A', 'G'}	0.0543478	0.978723	TRUE	FALSE	TRUE	0.10335	92	0	5	87	[['G', 'intron_variant', 'MODIFIER', 'C29F9.8', 'WBGene00016222', 'transcript', 'C29F9.8', 'protein_coding', '6/7', 'c.677+24T>C', '', '', '', '', '', '']]
III	95622	T	['C']	{'T', 'C'}	0.0543478	0.978723	TRUE	FALSE	TRUE	0.10335	92	0	5	87	[['C', 'missense_variant', 'MODERATE', 'C29F9.8', 'WBGene00016222', 'transcript', 'C29F9.8', 'protein_coding', '6/8', 'c.661A>G', 'p.Lys221Glu', '661/765', '661/765', '221/254', '', '']]
III	95670	G	['A']	{'A', 'G'}	0.119565	0.978723	TRUE	FALSE	TRUE	0.211689	92	0	11	81	[['A', 'missense_variant', 'MODERATE', 'C29F9.8', 'WBGene00016222', 'transcript', 'C29F9.8', 'protein_coding', '6/8', 'c.613C>T', 'p.Leu205Phe', '613/765', '613/765', '205/254', '', '']]
III	95675	A	['T']	{'T', 'A'}	0.0652174	0.978723	TRUE	FALSE	FALSE	0.122594	92	0	6	86	[['T', 'missense_variant', 'MODERATE', 'C29F9.8', 'WBGene00016222', 'transcript', 'C29F9.8', 'protein_coding', '6/8', 'c.608T>A', 'p.Val203Glu', '608/765', '608/765', '203/254', '', '']]
III	95754	G	['A']	{'A', 'G'}	0.127907	0.914894	TRUE	FALSE	TRUE	0.224398	86	0	11	75	[['A', 'intron_variant', 'MODIFIER', 'C29F9.8', 'WBGene00016222', 'transcript', 'C29F9.8', 'protein_coding', '5/7', 'c.597-68C>T', '', '', '', '', '', '']]
III	95773	G	['A']	{'A', 'G'}	0.0581395	0.914894	TRUE	FALSE	TRUE	0.110159	86	0	5	81	[['A', 'intron_variant', 'MODIFIER', 'C29F9.8', 'WBGene00016222', 'transcript', 'C29F9.8', 'protein_coding', '5/7', 'c.597-87C>T', '', '', '', '', '', '']]
III	95787	CAATATTCCA	['C']	{'CAATATTCCA', 'C'}	0.0581395	0.914894	FALSE	TRUE	FALSE	0.110159	86	0	5	81	[['C', 'intron_variant', 'MODIFIER', 'C29F9.8', 'WBGene00016222', 'transcript', 'C29F9.8', 'protein_coding', '5/7', 'c.597-110_597-102delTGGAATATT', '', '', '', '', '', '']]
III	95789	ATATTCCAAAG	['A']	{'A', 'ATATTCCAAAG'}	0.0114943	0.925532	FALSE	TRUE	FALSE	0.0228556	87	0	1	86	[['A', 'intron_variant', 'MODIFIER', 'C29F9.8', 'WBGene00016222', 'transcript', 'C29F9.8', 'protein_coding', '5/7', 'c.597-113_597-104delCTTTGGAATA', '', '', '', '', '', '']]
III	95857	C	['CTT', 'CCTAATTTTAGTTTTTTTACATT']	{'CTT', 'C'}	0.0229885	0.925532	FALSE	TRUE	FALSE	0.0451797	87	0	2	85	[['CCTAATTTTAGTTTTTTTACATT', 'intron_variant', 'MODIFIER', 'C29F9.8', 'WBGene00016222', 'transcript', 'C29F9.8', 'protein_coding', '5/7', 'c.597-172_597-171insAATGTAAAAAAACTAAAATTAG', '', '', '', '', '', ''], ['CTT', 'intron_variant', 'MODIFIER', 'C29F9.8', 'WBGene00016222', 'transcript', 'C29F9.8', 'protein_coding', '5/7', 'c.597-172_597-171insAA', '', '', '', '', '', '']]
III	95885	T	['C']	{'T', 'C'}	0.0574713	0.925532	TRUE	FALSE	TRUE	0.108963	87	0	5	82	[['C', 'intron_variant', 'MODIFIER', 'C29F9.8', 'WBGene00016222', 'transcript', 'C29F9.8', 'protein_coding', '5/7', 'c.597-199A>G', '', '', '', '', '', '']]
III	95932	T	['C']	{'T', 'C'}	0.0568182	0.93617	TRUE	FALSE	TRUE	0.107792	88	0	5	83	[['C', 'intron_variant', 'MODIFIER', 'C29F9.8', 'WBGene00016222', 'transcript', 'C29F9.8', 'protein_coding', '5/7', 'c.597-246A>G', '', '', '', '', '', '']]
III	95943	G	['A']	{'A', 'G'}	0.0978261	0.978723	TRUE	FALSE	TRUE	0.177477	92	0	9	83	[['A', 'intron_variant', 'MODIFIER', 'C29F9.8', 'WBGene00016222', 'transcript', 'C29F9.8', 'protein_coding', '5/7', 'c.597-257C>T', '', '', '', '', '', '']]
III	95951	T	['A']	{'T', 'A'}	0.0652174	0.978723	TRUE	FALSE	FALSE	0.122594	92	0	6	86	[['A', 'intron_variant', 'MODIFIER', 'C29F9.8', 'WBGene00016222', 'transcript', 'C29F9.8', 'protein_coding', '5/7', 'c.597-265A>T', '', '', '', '', '', '']]
III	95965	C	['T']	{'T', 'C'}	0.0652174	0.978723	TRUE	FALSE	TRUE	0.122594	92	0	6	86	[['T', 'intron_variant', 'MODIFIER', 'C29F9.8', 'WBGene00016222', 'transcript', 'C29F9.8', 'protein_coding', '5/7', 'c.597-279G>A', '', '', '', '', '', '']]
III	95984	G	['GCAATTTT']	{'GCAATTTT', 'G'}	0.0543478	0.978723	FALSE	TRUE	FALSE	0.10335	92	0	5	87	[['GCAATTTT', 'intron_variant', 'MODIFIER', 'C29F9.8', 'WBGene00016222', 'transcript', 'C29F9.8', 'protein_coding', '5/7', 'c.597-299_597-298insAAAATTG', '', '', '', '', '', '']]
III	95997	C	['A']	{'A', 'C'}	0.123596	0.946809	TRUE	FALSE	FALSE	0.217863	89	0	11	78	[['A', 'intron_variant', 'MODIFIER', 'C29F9.8', 'WBGene00016222', 'transcript', 'C29F9.8', 'protein_coding', '5/7', 'c.597-311G>T', '', '', '', '', '', '']]
III	95997	CA	['C']	{'CA', 'C'}	0.0375	0.851064	FALSE	TRUE	FALSE	0.0726415	80	0	3	77	[['C', 'intron_variant', 'MODIFIER', 'C29F9.8', 'WBGene00016222', 'transcript', 'C29F9.8', 'protein_coding', '5/7', 'c.597-312delT', '', '', '', '', '', '']]
III	96061	G	['A']	{'A', 'G'}	0.0574713	0.925532	TRUE	FALSE	TRUE	0.108963	87	0	5	82	[['A', 'intron_variant', 'MODIFIER', 'C29F9.8', 'WBGene00016222', 'transcript', 'C29F9.8', 'protein_coding', '5/7', 'c.597-375C>T', '', '', '', '', '', '']]
III	96075	A	['T']	{'T', 'A'}	0.0574713	0.925532	TRUE	FALSE	FALSE	0.108963	87	0	5	82	[['T', 'intron_variant', 'MODIFIER', 'C29F9.8', 'WBGene00016222', 'transcript', 'C29F9.8', 'protein_coding', '5/7', 'c.597-389T>A', '', '', '', '', '', '']]
III	96078	G	['T']	{'T', 'G'}	0.0574713	0.925532	TRUE	FALSE	FALSE	0.108963	87	0	5	82	[['T', 'intron_variant', 'MODIFIER', 'C29F9.8', 'WBGene00016222', 'transcript', 'C29F9.8', 'protein_coding', '5/7', 'c.597-392C>A', '', '', '', '', '', '']]
III	96079	C	['A']	{'A', 'C'}	0.0574713	0.925532	TRUE	FALSE	FALSE	0.108963	87	0	5	82	[['A', 'intron_variant', 'MODIFIER', 'C29F9.8', 'WBGene00016222', 'transcript', 'C29F9.8', 'protein_coding', '5/7', 'c.597-393G>T', '', '', '', '', '', '']]
III	96082	C	['A']	{'A', 'C'}	0.0574713	0.925532	TRUE	FALSE	FALSE	0.108963	87	0	5	82	[['A', 'intron_variant', 'MODIFIER', 'C29F9.8', 'WBGene00016222', 'transcript', 'C29F9.8', 'protein_coding', '5/7', 'c.597-396G>T', '', '', '', '', '', '']]
III	96099	G	['A']	{'A', 'G'}	0.0574713	0.925532	TRUE	FALSE	TRUE	0.108963	87	0	5	82	[['A', 'intron_variant', 'MODIFIER', 'C29F9.8', 'WBGene00016222', 'transcript', 'C29F9.8', 'protein_coding', '5/7', 'c.597-413C>T', '', '', '', '', '', '']]
III	96131	T	['A']	{'T', 'A'}	0.0659341	0.968085	TRUE	FALSE	FALSE	0.123854	91	0	6	85	[['A', 'intron_variant', 'MODIFIER', 'C29F9.8', 'WBGene00016222', 'transcript', 'C29F9.8', 'protein_coding', '5/7', 'c.597-445A>T', '', '', '', '', '', '']]
III	96135	C	['T']	{'T', 'C'}	0.0659341	0.968085	TRUE	FALSE	TRUE	0.123854	91	0	6	85	[['T', 'intron_variant', 'MODIFIER', 'C29F9.8', 'WBGene00016222', 'transcript', 'C29F9.8', 'protein_coding', '5/7', 'c.597-449G>A', '', '', '', '', '', '']]
III	96141	C	['T']	{'T', 'C'}	0.0659341	0.968085	TRUE	FALSE	TRUE	0.123854	91	0	6	85	[['T', 'intron_variant', 'MODIFIER', 'C29F9.8', 'WBGene00016222', 'transcript', 'C29F9.8', 'protein_coding', '5/7', 'c.597-455G>A', '', '', '', '', '', '']]
III	96148	G	['A']	{'A', 'G'}	0.0549451	0.968085	TRUE	FALSE	TRUE	0.104426	91	0	5	86	[['A', 'intron_variant', 'MODIFIER', 'C29F9.8', 'WBGene00016222', 'transcript', 'C29F9.8', 'protein_coding', '5/7', 'c.597-462C>T', '', '', '', '', '', '']]
III	96156	CTA	['C']	{'C', 'CTA'}	0.0581395	0.914894	FALSE	TRUE	FALSE	0.110159	86	0	5	81	[['C', 'intron_variant', 'MODIFIER', 'C29F9.8', 'WBGene00016222', 'transcript', 'C29F9.8', 'protein_coding', '5/7', 'c.597-472_597-471delTA', '', '', '', '', '', '']]
III	96197	A	['C']	{'A', 'C'}	0.0659341	0.968085	TRUE	FALSE	FALSE	0.123854	91	0	6	85	[['C', 'intron_variant', 'MODIFIER', 'C29F9.8', 'WBGene00016222', 'transcript', 'C29F9.8', 'protein_coding', '5/7', 'c.597-511T>G', '', '', '', '', '', '']]
III	96201	T	['A']	{'T', 'A'}	0.0659341	0.968085	TRUE	FALSE	FALSE	0.123854	91	0	6	85	[['A', 'intron_variant', 'MODIFIER', 'C29F9.8', 'WBGene00016222', 'transcript', 'C29F9.8', 'protein_coding', '5/7', 'c.597-515A>T', '', '', '', '', '', '']]
III	96203	A	['T']	{'T', 'A'}	0.0659341	0.968085	TRUE	FALSE	FALSE	0.123854	91	0	6	85	[['T', 'intron_variant', 'MODIFIER', 'C29F9.8', 'WBGene00016222', 'transcript', 'C29F9.8', 'protein_coding', '5/7', 'c.597-517T>A', '', '', '', '', '', '']]
III	96205	G	['A']	{'A', 'G'}	0.0659341	0.968085	TRUE	FALSE	TRUE	0.123854	91	0	6	85	[['A', 'intron_variant', 'MODIFIER', 'C29F9.8', 'WBGene00016222', 'transcript', 'C29F9.8', 'protein_coding', '5/7', 'c.597-519C>T', '', '', '', '', '', '']]
III	96284	T	['C']	{'T', 'C'}	0.120879	0.968085	TRUE	FALSE	TRUE	0.213709	91	0	11	80	[['C', 'intron_variant', 'MODIFIER', 'C29F9.8', 'WBGene00016222', 'transcript', 'C29F9.8', 'protein_coding', '5/7', 'c.596+503A>G', '', '', '', '', '', '']]
III	96292	A	['G']	{'A', 'G'}	0.021978	0.968085	TRUE	FALSE	TRUE	0.0432275	91	0	2	89	[['G', 'intron_variant', 'MODIFIER', 'C29F9.8', 'WBGene00016222', 'transcript', 'C29F9.8', 'protein_coding', '5/7', 'c.596+495T>C', '', '', '', '', '', '']]
III	96314	G	['T', 'A']	{'T', 'A', 'G'}	0.0824176	0.968085	TRUE	FALSE	FALSE	0.152085	91	1	7	83	[['A', 'intron_variant', 'MODIFIER', 'C29F9.8', 'WBGene00016222', 'transcript', 'C29F9.8', 'protein_coding', '5/7', 'c.596+473C>T', '', '', '', '', '', ''], ['T', 'intron_variant', 'MODIFIER', 'C29F9.8', 'WBGene00016222', 'transcript', 'C29F9.8', 'protein_coding', '5/7', 'c.596+473C>A', '', '', '', '', '', '']]
III	96315	G	['T', 'C']	{'T', 'G', 'C'}	0.0824176	0.968085	TRUE	FALSE	FALSE	0.152085	91	1	7	83	[['C', 'intron_variant', 'MODIFIER', 'C29F9.8', 'WBGene00016222', 'transcript', 'C29F9.8', 'protein_coding', '5/7', 'c.596+472C>G', '', '', '', '', '', ''], ['T', 'intron_variant', 'MODIFIER', 'C29F9.8', 'WBGene00016222', 'transcript', 'C29F9.8', 'protein_coding', '5/7', 'c.596+472C>A', '', '', '', '', '', '']]
III	96318	G	['T']	{'T', 'G'}	0.0659341	0.968085	TRUE	FALSE	FALSE	0.123854	91	0	6	85	[['T', 'intron_variant', 'MODIFIER', 'C29F9.8', 'WBGene00016222', 'transcript', 'C29F9.8', 'protein_coding', '5/7', 'c.596+469C>A', '', '', '', '', '', '']]
III	96319	A	['G']	{'A', 'G'}	0.0879121	0.968085	TRUE	FALSE	TRUE	0.161253	91	0	8	83	[['G', 'intron_variant', 'MODIFIER', 'C29F9.8', 'WBGene00016222', 'transcript', 'C29F9.8', 'protein_coding', '5/7', 'c.596+468T>C', '', '', '', '', '', '']]
III	96399	G	['A']	{'A', 'G'}	0.0549451	0.968085	TRUE	FALSE	TRUE	0.104426	91	0	5	86	[['A', 'intron_variant', 'MODIFIER', 'C29F9.8', 'WBGene00016222', 'transcript', 'C29F9.8', 'protein_coding', '5/7', 'c.596+388C>T', '', '', '', '', '', '']]
III	96401	G	['A']	{'A', 'G'}	0.0659341	0.968085	TRUE	FALSE	TRUE	0.123854	91	0	6	85	[['A', 'intron_variant', 'MODIFIER', 'C29F9.8', 'WBGene00016222', 'transcript', 'C29F9.8', 'protein_coding', '5/7', 'c.596+386C>T', '', '', '', '', '', '']]
III	96404	A	['G']	{'A', 'G'}	0.0659341	0.968085	TRUE	FALSE	TRUE	0.123854	91	0	6	85	[['G', 'intron_variant', 'MODIFIER', 'C29F9.8', 'WBGene00016222', 'transcript', 'C29F9.8', 'protein_coding', '5/7', 'c.596+383T>C', '', '', '', '', '', '']]
III	96423	GCA	['G']	{'GCA', 'G'}	0.0659341	0.968085	FALSE	TRUE	FALSE	0.123854	91	0	6	85	[['G', 'intron_variant', 'MODIFIER', 'C29F9.8', 'WBGene00016222', 'transcript', 'C29F9.8', 'protein_coding', '5/7', 'c.596+362_596+363delTG', '', '', '', '', '', '']]
III	96424	CAG	['C']	{'CAG', 'C'}	0.0581395	0.914894	FALSE	TRUE	FALSE	0.110159	86	0	5	81	[['C', 'intron_variant', 'MODIFIER', 'C29F9.8', 'WBGene00016222', 'transcript', 'C29F9.8', 'protein_coding', '5/7', 'c.596+361_596+362delCT', '', '', '', '', '', '']]
III	96458	A	['C']	{'A', 'C'}	0.120879	0.968085	TRUE	FALSE	FALSE	0.213709	91	0	11	80	[['C', 'intron_variant', 'MODIFIER', 'C29F9.8', 'WBGene00016222', 'transcript', 'C29F9.8', 'protein_coding', '5/7', 'c.596+329T>G', '', '', '', '', '', '']]
III	96493	T	['G']	{'T', 'G'}	0.0574713	0.925532	TRUE	FALSE	FALSE	0.108963	87	0	5	82	[['G', 'intron_variant', 'MODIFIER', 'C29F9.8', 'WBGene00016222', 'transcript', 'C29F9.8', 'protein_coding', '5/7', 'c.596+294A>C', '', '', '', '', '', '']]
III	96614	C	['A']	{'A', 'C'}	0.0581395	0.914894	TRUE	FALSE	FALSE	0.110159	86	0	5	81	[['A', 'intron_variant', 'MODIFIER', 'C29F9.8', 'WBGene00016222', 'transcript', 'C29F9.8', 'protein_coding', '5/7', 'c.596+173G>T', '', '', '', '', '', '']]
III	96649	G	['T']	{'T', 'G'}	0.0581395	0.914894	TRUE	FALSE	FALSE	0.110159	86	0	5	81	[['T', 'intron_variant', 'MODIFIER', 'C29F9.8', 'WBGene00016222', 'transcript', 'C29F9.8', 'protein_coding', '5/7', 'c.596+138C>A', '', '', '', '', '', '']]
III	96731	TA	['T']	{'TA', 'T'}	0.0361446	0.882979	FALSE	TRUE	FALSE	0.0700986	83	0	3	80	[['T', 'intron_variant', 'MODIFIER', 'C29F9.8', 'WBGene00016222', 'transcript', 'C29F9.8', 'protein_coding', '5/7', 'c.596+55delT', '', '', '', '', '', '']]
III	96732	A	['AGTTGCCAGCTGACGATATGTTT']	{'AGTTGCCAGCTGACGATATGTTT', 'A'}	0.0361446	0.882979	FALSE	TRUE	FALSE	0.0700986	83	0	3	80	[['AGTTGCCAGCTGACGATATGTTT', 'intron_variant', 'MODIFIER', 'C29F9.8', 'WBGene00016222', 'transcript', 'C29F9.8', 'protein_coding', '5/7', 'c.596+54_596+55insAAACATATCGTCAGCTGGCAAC', '', '', '', '', '', '']]
III	96792	G	['A']	{'A', 'G'}	0.0581395	0.914894	TRUE	FALSE	TRUE	0.110159	86	0	5	81	[['A', 'synonymous_variant', 'LOW', 'C29F9.8', 'WBGene00016222', 'transcript', 'C29F9.8', 'protein_coding', '5/8', 'c.591C>T', 'p.Asn197Asn', '591/765', '591/765', '197/254', '', '']]
III	96849	G	['A']	{'A', 'G'}	0.0666667	0.957447	TRUE	FALSE	TRUE	0.12514	90	0	6	84	[['A', 'synonymous_variant', 'LOW', 'C29F9.8', 'WBGene00016222', 'transcript', 'C29F9.8', 'protein_coding', '5/8', 'c.534C>T', 'p.Pro178Pro', '534/765', '534/765', '178/254', '', '']]
III	96864	C	['T']	{'T', 'C'}	0.0666667	0.957447	TRUE	FALSE	TRUE	0.12514	90	0	6	84	[['T', 'synonymous_variant', 'LOW', 'C29F9.8', 'WBGene00016222', 'transcript', 'C29F9.8', 'protein_coding', '5/8', 'c.519G>A', 'p.Ser173Ser', '519/765', '519/765', '173/254', '', '']]
III	96869	T	['C']	{'T', 'C'}	0.0666667	0.957447	TRUE	FALSE	TRUE	0.12514	90	0	6	84	[['C', 'missense_variant&splice_region_variant', 'MODERATE', 'C29F9.8', 'WBGene00016222', 'transcript', 'C29F9.8', 'protein_coding', '5/8', 'c.514A>G', 'p.Thr172Ala', '514/765', '514/765', '172/254', '', '']]
III	96883	C	['T']	{'T', 'C'}	0.0666667	0.957447	TRUE	FALSE	TRUE	0.12514	90	0	6	84	[['T', 'intron_variant', 'MODIFIER', 'C29F9.8', 'WBGene00016222', 'transcript', 'C29F9.8', 'protein_coding', '4/7', 'c.514-14G>A', '', '', '', '', '', '']]
III	96900	G	['C']	{'G', 'C'}	0.0588235	0.904255	TRUE	FALSE	FALSE	0.111382	85	0	5	80	[['C', 'intron_variant', 'MODIFIER', 'C29F9.8', 'WBGene00016222', 'transcript', 'C29F9.8', 'protein_coding', '4/7', 'c.513+19C>G', '', '', '', '', '', '']]
III	96923	C	['T']	{'T', 'C'}	0.0549451	0.968085	TRUE	FALSE	TRUE	0.104426	91	0	5	86	[['T', 'missense_variant', 'MODERATE', 'C29F9.8', 'WBGene00016222', 'transcript', 'C29F9.8', 'protein_coding', '4/8', 'c.509G>A', 'p.Arg170Lys', '509/765', '509/765', '170/254', '', '']]
III	96958	A	['G']	{'A', 'G'}	0.0659341	0.968085	TRUE	FALSE	TRUE	0.123854	91	0	6	85	[['G', 'synonymous_variant', 'LOW', 'C29F9.8', 'WBGene00016222', 'transcript', 'C29F9.8', 'protein_coding', '4/8', 'c.474T>C', 'p.Thr158Thr', '474/765', '474/765', '158/254', '', '']]
III	96964	C	['T']	{'T', 'C'}	0.0549451	0.968085	TRUE	FALSE	TRUE	0.104426	91	0	5	86	[['T', 'synonymous_variant', 'LOW', 'C29F9.8', 'WBGene00016222', 'transcript', 'C29F9.8', 'protein_coding', '4/8', 'c.468G>A', 'p.Arg156Arg', '468/765', '468/765', '156/254', '', '']]
III	97015	A	['T']	{'T', 'A'}	0.0659341	0.968085	TRUE	FALSE	FALSE	0.123854	91	0	6	85	[['T', 'synonymous_variant', 'LOW', 'C29F9.8', 'WBGene00016222', 'transcript', 'C29F9.8', 'protein_coding', '4/8', 'c.417T>A', 'p.Ile139Ile', '417/765', '417/765', '139/254', '', '']]
III	99593	T	['A']	{'T', 'A'}	0.0555556	0.957447	TRUE	FALSE	FALSE	0.105525	90	0	5	85
III	105647	T	['C']	{'T', 'C'}	0.011236	0.946809	TRUE	FALSE	TRUE	0.022345	89	0	1	88
III	107164	T	['C']	{'T', 'C'}	0.0851064	1	TRUE	FALSE	TRUE	0.156559	94	0	8	86	[['C', 'non_coding_transcript_exon_variant', 'MODIFIER', 'fbxa-57', 'WBGene00016224', 'transcript', 'C29F9.10', 'pseudogene', '2/2', 'n.362A>G', '', '', '', '', '', '']]
III	107168	T	['A']	{'T', 'A'}	0.0851064	1	TRUE	FALSE	FALSE	0.156559	94	0	8	86	[['A', 'non_coding_transcript_exon_variant', 'MODIFIER', 'fbxa-57', 'WBGene00016224', 'transcript', 'C29F9.10', 'pseudogene', '2/2', 'n.358A>T', '', '', '', '', '', '']]
III	107169	G	['A', 'T', 'C']	{'T', 'A', 'G'}	0.12766	1	TRUE	FALSE	FALSE	0.223916	94	4	10	80	[['A', 'non_coding_transcript_exon_variant', 'MODIFIER', 'fbxa-57', 'WBGene00016224', 'transcript', 'C29F9.10', 'pseudogene', '2/2', 'n.357C>T', '', '', '', '', '', ''], ['C', 'non_coding_transcript_exon_variant', 'MODIFIER', 'fbxa-57', 'WBGene00016224', 'transcript', 'C29F9.10', 'pseudogene', '2/2', 'n.357C>G', '', '', '', '', '', ''], ['T', 'non_coding_transcript_exon_variant', 'MODIFIER', 'fbx…
III	107171	T	['A', 'G', 'C']	{'T', 'A'}	0.0797872	1	TRUE	FALSE	FALSE	0.147628	94	1	7	86	[['A', 'non_coding_transcript_exon_variant', 'MODIFIER', 'fbxa-57', 'WBGene00016224', 'transcript', 'C29F9.10', 'pseudogene', '2/2', 'n.355A>T', '', '', '', '', '', ''], ['C', 'non_coding_transcript_exon_variant', 'MODIFIER', 'fbxa-57', 'WBGene00016224', 'transcript', 'C29F9.10', 'pseudogene', '2/2', 'n.355A>G', '', '', '', '', '', ''], ['G', 'non_coding_transcript_exon_variant', 'MODIFIER', 'fbx…
III	107172	G	['A']	{'A', 'G'}	0.0797872	1	TRUE	FALSE	TRUE	0.147628	94	1	7	86	[['A', 'non_coding_transcript_exon_variant', 'MODIFIER', 'fbxa-57', 'WBGene00016224', 'transcript', 'C29F9.10', 'pseudogene', '2/2', 'n.354C>T', '', '', '', '', '', '']]
III	107182	G	['T', 'C', 'A']	{'T', 'A', 'G', 'C'}	0.106383	1	TRUE	FALSE	FALSE	0.191148	94	4	8	82	[['A', 'non_coding_transcript_exon_variant', 'MODIFIER', 'fbxa-57', 'WBGene00016224', 'transcript', 'C29F9.10', 'pseudogene', '2/2', 'n.344C>T', '', '', '', '', '', ''], ['C', 'non_coding_transcript_exon_variant', 'MODIFIER', 'fbxa-57', 'WBGene00016224', 'transcript', 'C29F9.10', 'pseudogene', '2/2', 'n.344C>G', '', '', '', '', '', ''], ['T', 'non_coding_transcript_exon_variant', 'MODIFIER', 'fbx…
III	107199	C	['T', 'A']	{'T', 'C'}	0.0797872	1	TRUE	FALSE	FALSE	0.147628	94	3	6	85	[['A', 'non_coding_transcript_exon_variant', 'MODIFIER', 'fbxa-57', 'WBGene00016224', 'transcript', 'C29F9.10', 'pseudogene', '2/2', 'n.327G>T', '', '', '', '', '', ''], ['T', 'non_coding_transcript_exon_variant', 'MODIFIER', 'fbxa-57', 'WBGene00016224', 'transcript', 'C29F9.10', 'pseudogene', '2/2', 'n.327G>A', '', '', '', '', '', '']]
III	107228	C	['A']	{'A', 'C'}	0.0265957	1	TRUE	FALSE	FALSE	0.0520537	94	3	1	90	[['A', 'non_coding_transcript_exon_variant', 'MODIFIER', 'fbxa-57', 'WBGene00016224', 'transcript', 'C29F9.10', 'pseudogene', '2/2', 'n.298G>T', '', '', '', '', '', '']]
III	107261	T	['C']	{'T', 'C'}	0.0106383	1	TRUE	FALSE	TRUE	0.0211628	94	0	1	93	[['C', 'non_coding_transcript_exon_variant', 'MODIFIER', 'fbxa-57', 'WBGene00016224', 'transcript', 'C29F9.10', 'pseudogene', '2/2', 'n.265A>G', '', '', '', '', '', '']]
III	107268	T	['A', 'G']	{'T', 'A', 'G'}	0.0217391	0.978723	TRUE	FALSE	FALSE	0.0427655	92	0	2	90	[['A', 'non_coding_transcript_exon_variant', 'MODIFIER', 'fbxa-57', 'WBGene00016224', 'transcript', 'C29F9.10', 'pseudogene', '2/2', 'n.258A>T', '', '', '', '', '', ''], ['G', 'non_coding_transcript_exon_variant', 'MODIFIER', 'fbxa-57', 'WBGene00016224', 'transcript', 'C29F9.10', 'pseudogene', '2/2', 'n.258A>C', '', '', '', '', '', '']]
III	107276	G	['A']	{'A', 'G'}	0.0108696	0.978723	TRUE	FALSE	TRUE	0.0216203	92	0	1	91	[['A', 'non_coding_transcript_exon_variant', 'MODIFIER', 'fbxa-57', 'WBGene00016224', 'transcript', 'C29F9.10', 'pseudogene', '2/2', 'n.250C>T', '', '', '', '', '', '']]
III	107286	C	['T', 'A']	{'T', 'A', 'C'}	0.0744681	1	TRUE	FALSE	FALSE	0.138582	94	10	2	82	[['A', 'non_coding_transcript_exon_variant', 'MODIFIER', 'fbxa-57', 'WBGene00016224', 'transcript', 'C29F9.10', 'pseudogene', '2/2', 'n.240G>T', '', '', '', '', '', ''], ['T', 'non_coding_transcript_exon_variant', 'MODIFIER', 'fbxa-57', 'WBGene00016224', 'transcript', 'C29F9.10', 'pseudogene', '2/2', 'n.240G>A', '', '', '', '', '', '']]
III	107287	G	['T']	{'T', 'G'}	0.0638298	1	TRUE	FALSE	FALSE	0.12015	94	10	1	83	[['T', 'non_coding_transcript_exon_variant', 'MODIFIER', 'fbxa-57', 'WBGene00016224', 'transcript', 'C29F9.10', 'pseudogene', '2/2', 'n.239C>A', '', '', '', '', '', '']]
III	107358	C	['T', 'A']	{'T', 'C'}	0.0904255	1	TRUE	FALSE	FALSE	0.165377	94	3	7	84	[['A', 'non_coding_transcript_exon_variant', 'MODIFIER', 'fbxa-57', 'WBGene00016224', 'transcript', 'C29F9.10', 'pseudogene', '2/2', 'n.168G>T', '', '', '', '', '', ''], ['T', 'non_coding_transcript_exon_variant', 'MODIFIER', 'fbxa-57', 'WBGene00016224', 'transcript', 'C29F9.10', 'pseudogene', '2/2', 'n.168G>A', '', '', '', '', '', '']]
III	107442	T	['C', 'G']	{'T', 'C'}	0.0265957	1	TRUE	FALSE	FALSE	0.0520537	94	1	2	91	[['C', 'splice_region_variant&non_coding_transcript_exon_variant', 'LOW', 'fbxa-57', 'WBGene00016224', 'transcript', 'C29F9.10', 'pseudogene', '2/2', 'n.84A>G', '', '', '', '', '', ''], ['G', 'splice_region_variant&non_coding_transcript_exon_variant', 'LOW', 'fbxa-57', 'WBGene00016224', 'transcript', 'C29F9.10', 'pseudogene', '2/2', 'n.84A>C', '', '', '', '', '', '']]
III	107477	T	['C']	{'T', 'C'}	0.0212766	1	TRUE	FALSE	TRUE	0.0418705	94	2	1	91	[['C', 'intron_variant', 'MODIFIER', 'fbxa-57', 'WBGene00016224', 'transcript', 'C29F9.10', 'pseudogene', '1/1', 'n.84-35A>G', '', '', '', '', '', '']]
III	107556	T	['C']	{'T', 'C'}	0.0106383	1	TRUE	FALSE	TRUE	0.0211628	94	0	1	93	[['C', 'intron_variant', 'MODIFIER', 'fbxa-57', 'WBGene00016224', 'transcript', 'C29F9.10', 'pseudogene', '1/1', 'n.84-114A>G', '', '', '', '', '', '']]
III	107559	T	['A']	{'T', 'A'}	0.0106383	1	TRUE	FALSE	FALSE	0.0211628	94	0	1	93	[['A', 'intron_variant', 'MODIFIER', 'fbxa-57', 'WBGene00016224', 'transcript', 'C29F9.10', 'pseudogene', '1/1', 'n.84-117A>T', '', '', '', '', '', '']]
III	107654	A	['G']	{'A', 'G'}	0.0744681	1	TRUE	FALSE	TRUE	0.138582	94	2	6	86	[['G', 'intron_variant', 'MODIFIER', 'fbxa-57', 'WBGene00016224', 'transcript', 'C29F9.10', 'pseudogene', '1/1', 'n.83+163T>C', '', '', '', '', '', '']]
III	107687	GT	['GTCT', 'GTTT', 'GTT', 'G', 'GTTTT']	{'GTTT', 'GT', 'GTCT', 'GTT', 'G'}	0.239362	1	FALSE	TRUE	FALSE	0.366083	94	1	22	71	[['G', 'intron_variant', 'MODIFIER', 'fbxa-57', 'WBGene00016224', 'transcript', 'C29F9.10', 'pseudogene', '1/1', 'n.83+129delA', '', '', '', '', '', ''], ['GTCT', 'intron_variant', 'MODIFIER', 'fbxa-57', 'WBGene00016224', 'transcript', 'C29F9.10', 'pseudogene', '1/1', 'n.83+128_83+129insAG', '', '', '', '', '', ''], ['GTT', 'intron_variant', 'MODIFIER', 'fbxa-57', 'WBGene00016224', 'transcript', …
III	107773	A	['C']	{'A', 'C'}	0.0797872	1	TRUE	FALSE	FALSE	0.147628	94	1	7	86	[['C', 'intron_variant', 'MODIFIER', 'fbxa-57', 'WBGene00016224', 'transcript', 'C29F9.10', 'pseudogene', '1/1', 'n.83+44T>G', '', '', '', '', '', '']]
III	107794	GAA	['GA', 'G']	{'GAA', 'GA', 'G'}	0.0957447	1	FALSE	TRUE	FALSE	0.174081	94	0	9	85	[['G', 'intron_variant', 'MODIFIER', 'fbxa-57', 'WBGene00016224', 'transcript', 'C29F9.10', 'pseudogene', '1/1', 'n.83+21_83+22delTT', '', '', '', '', '', ''], ['GA', 'intron_variant', 'MODIFIER', 'fbxa-57', 'WBGene00016224', 'transcript', 'C29F9.10', 'pseudogene', '1/1', 'n.83+21delT', '', '', '', '', '', '']]
III	107871	T	['C']	{'T', 'C'}	0.0106383	1	TRUE	FALSE	TRUE	0.0211628	94	0	1	93	[['C', 'non_coding_transcript_exon_variant', 'MODIFIER', 'fbxa-57', 'WBGene00016224', 'transcript', 'C29F9.10', 'pseudogene', '1/2', 'n.29A>G', '', '', '', '', '', '']]
III	107930	G	['A', 'T']	{'T', 'G'}	0.0106383	1	TRUE	FALSE	FALSE	0.0211628	94	0	1	93
III	107967	C	['A', 'T']	{'A', 'C'}	0.101064	1	TRUE	FALSE	FALSE	0.182672	94	5	7	82
III	107968	C	['T']	{'T', 'C'}	0.101064	1	TRUE	FALSE	TRUE	0.182672	94	5	7	82
III	107994	CG	['C']	{'CG', 'C'}	0.426136	0.93617	FALSE	TRUE	FALSE	0.491883	88	1	37	50
III	108462	G	['A']	{'A', 'G'}	0.0483871	0.989362	TRUE	FALSE	TRUE	0.0925894	93	7	1	85
III	108510	C	['T']	{'T', 'C'}	0.0319149	1	TRUE	FALSE	TRUE	0.0621231	94	2	2	90
III	108571	T	['A']	{'T', 'A'}	0.0106383	1	TRUE	FALSE	FALSE	0.0211628	94	0	1	93
III	108577	T	['C']	{'T', 'C'}	0.0212766	1	TRUE	FALSE	TRUE	0.0418705	94	0	2	92
III	108603	C	['A']	{'A', 'C'}	0.111702	1	TRUE	FALSE	FALSE	0.199511	94	5	8	81
III	108605	T	['A']	{'T', 'A'}	0.0752688	0.989362	TRUE	FALSE	FALSE	0.139959	93	0	7	86
III	108606	T	['C']	{'T', 'C'}	0.0107527	0.989362	TRUE	FALSE	TRUE	0.0213891	93	0	1	92
III	108608	C	['G']	{'G', 'C'}	0.111702	1	TRUE	FALSE	FALSE	0.199511	94	5	8	81
III	108609	A	['G']	{'A', 'G'}	0.0106383	1	TRUE	FALSE	TRUE	0.0211628	94	0	1	93
III	108612	T	['C']	{'T', 'C'}	0.0106383	1	TRUE	FALSE	TRUE	0.0211628	94	0	1	93
III	108614	T	['C']	{'T', 'C'}	0.0265957	1	TRUE	FALSE	TRUE	0.0520537	94	1	2	91
III	108623	T	['C']	{'T', 'C'}	0.0744681	1	TRUE	FALSE	TRUE	0.138582	94	0	7	87
III	108627	C	['T']	{'T', 'C'}	0.0106383	1	TRUE	FALSE	TRUE	0.0211628	94	0	1	93
III	108644	A	['G', 'C']	{'A', 'C'}	0.0106383	1	TRUE	FALSE	FALSE	0.0211628	94	0	1	93
III	108649	A	['C', 'T', 'G']	{'T', 'A', 'G', 'C'}	0.0691489	1	TRUE	FALSE	FALSE	0.129423	94	9	2	83
III	108659	T	['G']	{'T', 'G'}	0.0106383	1	TRUE	FALSE	FALSE	0.0211628	94	0	1	93
III	108742	C	['T', 'A']	{'T', 'A', 'C'}	0.0212766	1	TRUE	FALSE	FALSE	0.0418705	94	0	2	92
III	108886	G	['GAAAAC']	{'GAAAAC', 'G'}	0.015873	0.670213	FALSE	TRUE	FALSE	0.0314921	63	0	1	62
III	109096	T	['A', 'C']	{'T', 'A', 'C'}	0.037234	1	TRUE	FALSE	FALSE	0.0720787	94	1	3	90
III	109098	G	['T']	{'T', 'G'}	0.0319149	1	TRUE	FALSE	FALSE	0.0621231	94	0	3	91
III	109108	C	['A']	{'A', 'C'}	0.0106383	1	TRUE	FALSE	FALSE	0.0211628	94	0	1	93
III	109120	CACACCAA	['C']	{'CACACCAA', 'C'}	0.016129	0.989362	FALSE	TRUE	FALSE	0.0319093	93	1	1	91
III	109215	TTA	['T']	{'TTA', 'T'}	0.0978261	0.978723	FALSE	TRUE	FALSE	0.177477	92	14	2	76
III	109216	TAA	['TA', 'T']	{'TA', 'TAA'}	0.115385	0.968085	FALSE	TRUE	FALSE	0.20527	91	1	10	80
III	109282	A	['G']	{'A', 'G'}	0.0107527	0.989362	TRUE	FALSE	TRUE	0.0213891	93	0	1	92
III	109321	T	['C']	{'T', 'C'}	0.0106383	1	TRUE	FALSE	TRUE	0.0211628	94	0	1	93
III	109334	C	['T']	{'T', 'C'}	0.0851064	1	TRUE	FALSE	TRUE	0.156559	94	0	8	86	[['T', 'non_coding_transcript_exon_variant', 'MODIFIER', 'fbxa-58', 'WBGene00016225', 'transcript', 'C29F9.11', 'pseudogene', '2/2', 'n.811G>A', '', '', '', '', '', '']]
III	109336	C	['A']	{'A', 'C'}	0.0744681	1	TRUE	FALSE	FALSE	0.138582	94	0	7	87	[['A', 'non_coding_transcript_exon_variant', 'MODIFIER', 'fbxa-58', 'WBGene00016225', 'transcript', 'C29F9.11', 'pseudogene', '2/2', 'n.809G>T', '', '', '', '', '', '']]
III	109351	G	['C', 'T', 'A']	{'T', 'G', 'C'}	0.0376344	0.989362	TRUE	FALSE	FALSE	0.0728277	93	1	3	89	[['A', 'non_coding_transcript_exon_variant', 'MODIFIER', 'fbxa-58', 'WBGene00016225', 'transcript', 'C29F9.11', 'pseudogene', '2/2', 'n.794C>T', '', '', '', '', '', ''], ['C', 'non_coding_transcript_exon_variant', 'MODIFIER', 'fbxa-58', 'WBGene00016225', 'transcript', 'C29F9.11', 'pseudogene', '2/2', 'n.794C>G', '', '', '', '', '', ''], ['T', 'non_coding_transcript_exon_variant', 'MODIFIER', 'fbx…
III	109352	A	['T', 'G']	{'T', 'A'}	0.0215054	0.989362	TRUE	FALSE	FALSE	0.0423133	93	0	2	91	[['G', 'non_coding_transcript_exon_variant', 'MODIFIER', 'fbxa-58', 'WBGene00016225', 'transcript', 'C29F9.11', 'pseudogene', '2/2', 'n.793T>C', '', '', '', '', '', ''], ['T', 'non_coding_transcript_exon_variant', 'MODIFIER', 'fbxa-58', 'WBGene00016225', 'transcript', 'C29F9.11', 'pseudogene', '2/2', 'n.793T>A', '', '', '', '', '', '']]
III	109356	G	['A']	{'A', 'G'}	0.0215054	0.989362	TRUE	FALSE	TRUE	0.0423133	93	0	2	91	[['A', 'non_coding_transcript_exon_variant', 'MODIFIER', 'fbxa-58', 'WBGene00016225', 'transcript', 'C29F9.11', 'pseudogene', '2/2', 'n.789C>T', '', '', '', '', '', '']]
III	109357	A	['T', 'G']	{'T', 'A', 'G'}	0.0322581	0.989362	TRUE	FALSE	FALSE	0.0627724	93	0	3	90	[['G', 'non_coding_transcript_exon_variant', 'MODIFIER', 'fbxa-58', 'WBGene00016225', 'transcript', 'C29F9.11', 'pseudogene', '2/2', 'n.788T>C', '', '', '', '', '', ''], ['T', 'non_coding_transcript_exon_variant', 'MODIFIER', 'fbxa-58', 'WBGene00016225', 'transcript', 'C29F9.11', 'pseudogene', '2/2', 'n.788T>A', '', '', '', '', '', '']]
III	109487	C	['A', 'G']	{'A', 'C'}	0.0681818	0.93617	TRUE	FALSE	FALSE	0.127792	88	0	6	82	[['A', 'non_coding_transcript_exon_variant', 'MODIFIER', 'fbxa-58', 'WBGene00016225', 'transcript', 'C29F9.11', 'pseudogene', '2/2', 'n.658G>T', '', '', '', '', '', ''], ['G', 'non_coding_transcript_exon_variant', 'MODIFIER', 'fbxa-58', 'WBGene00016225', 'transcript', 'C29F9.11', 'pseudogene', '2/2', 'n.658G>C', '', '', '', '', '', '']]
III	109623	C	['T', 'A']	{'T', 'A', 'C'}	0.154255	1	TRUE	FALSE	FALSE	0.262317	94	5	12	77	[['A', 'non_coding_transcript_exon_variant', 'MODIFIER', 'fbxa-58', 'WBGene00016225', 'transcript', 'C29F9.11', 'pseudogene', '1/2', 'n.563G>T', '', '', '', '', '', ''], ['T', 'non_coding_transcript_exon_variant', 'MODIFIER', 'fbxa-58', 'WBGene00016225', 'transcript', 'C29F9.11', 'pseudogene', '1/2', 'n.563G>A', '', '', '', '', '', '']]
III	109765	A	['C']	{'A', 'C'}	0.12766	1	TRUE	FALSE	FALSE	0.223916	94	4	10	80	[['C', 'non_coding_transcript_exon_variant', 'MODIFIER', 'fbxa-58', 'WBGene00016225', 'transcript', 'C29F9.11', 'pseudogene', '1/2', 'n.421T>G', '', '', '', '', '', '']]
III	109767	A	['G']	{'A', 'G'}	0.0159574	1	TRUE	FALSE	TRUE	0.0315736	94	1	1	92	[['G', 'non_coding_transcript_exon_variant', 'MODIFIER', 'fbxa-58', 'WBGene00016225', 'transcript', 'C29F9.11', 'pseudogene', '1/2', 'n.419T>C', '', '', '', '', '', '']]
III	110045	A	['T', 'G']	{'T', 'A'}	0.12234	1	TRUE	FALSE	FALSE	0.215895	94	5	9	80	[['G', 'non_coding_transcript_exon_variant', 'MODIFIER', 'fbxa-58', 'WBGene00016225', 'transcript', 'C29F9.11', 'pseudogene', '1/2', 'n.141T>C', '', '', '', '', '', ''], ['T', 'non_coding_transcript_exon_variant', 'MODIFIER', 'fbxa-58', 'WBGene00016225', 'transcript', 'C29F9.11', 'pseudogene', '1/2', 'n.141T>A', '', '', '', '', '', '']]
III	110078	A	['T']	{'T', 'A'}	0.12766	1	TRUE	FALSE	FALSE	0.223916	94	2	11	81	[['T', 'non_coding_transcript_exon_variant', 'MODIFIER', 'fbxa-58', 'WBGene00016225', 'transcript', 'C29F9.11', 'pseudogene', '1/2', 'n.108T>A', '', '', '', '', '', '']]
III	110079	A	['C']	{'A', 'C'}	0.0265957	1	TRUE	FALSE	FALSE	0.0520537	94	1	2	91	[['C', 'non_coding_transcript_exon_variant', 'MODIFIER', 'fbxa-58', 'WBGene00016225', 'transcript', 'C29F9.11', 'pseudogene', '1/2', 'n.107T>G', '', '', '', '', '', '']]
III	110105	C	['T', 'G', 'A']	{'T', 'A', 'C'}	0.0967742	0.989362	TRUE	FALSE	FALSE	0.175763	93	0	9	84	[['A', 'non_coding_transcript_exon_variant', 'MODIFIER', 'fbxa-58', 'WBGene00016225', 'transcript', 'C29F9.11', 'pseudogene', '1/2', 'n.81G>T', '', '', '', '', '', ''], ['G', 'non_coding_transcript_exon_variant', 'MODIFIER', 'fbxa-58', 'WBGene00016225', 'transcript', 'C29F9.11', 'pseudogene', '1/2', 'n.81G>C', '', '', '', '', '', ''], ['T', 'non_coding_transcript_exon_variant', 'MODIFIER', 'fbxa-…
III	110106	G	['A', 'T']	{'T', 'G'}	0.0860215	0.989362	TRUE	FALSE	FALSE	0.158094	93	0	8	85	[['A', 'non_coding_transcript_exon_variant', 'MODIFIER', 'fbxa-58', 'WBGene00016225', 'transcript', 'C29F9.11', 'pseudogene', '1/2', 'n.80C>T', '', '', '', '', '', ''], ['T', 'non_coding_transcript_exon_variant', 'MODIFIER', 'fbxa-58', 'WBGene00016225', 'transcript', 'C29F9.11', 'pseudogene', '1/2', 'n.80C>A', '', '', '', '', '', '']]
III	110107	T	['C', 'A']	{'T', 'A', 'C'}	0.0967742	0.989362	TRUE	FALSE	FALSE	0.175763	93	0	9	84	[['A', 'non_coding_transcript_exon_variant', 'MODIFIER', 'fbxa-58', 'WBGene00016225', 'transcript', 'C29F9.11', 'pseudogene', '1/2', 'n.79A>T', '', '', '', '', '', ''], ['C', 'non_coding_transcript_exon_variant', 'MODIFIER', 'fbxa-58', 'WBGene00016225', 'transcript', 'C29F9.11', 'pseudogene', '1/2', 'n.79A>G', '', '', '', '', '', '']]
III	110110	C	['G', 'A']	{'A', 'C'}	0.0967742	0.989362	TRUE	FALSE	FALSE	0.175763	93	0	9	84	[['A', 'non_coding_transcript_exon_variant', 'MODIFIER', 'fbxa-58', 'WBGene00016225', 'transcript', 'C29F9.11', 'pseudogene', '1/2', 'n.76G>T', '', '', '', '', '', ''], ['G', 'non_coding_transcript_exon_variant', 'MODIFIER', 'fbxa-58', 'WBGene00016225', 'transcript', 'C29F9.11', 'pseudogene', '1/2', 'n.76G>C', '', '', '', '', '', '']]
III	111230	G	['A', 'T']	{'A', 'G'}	0.0107527	0.989362	TRUE	FALSE	FALSE	0.0213891	93	0	1	92
III	111461	AAG	['A']	{'A', 'AAG'}	0.0111111	0.957447	FALSE	TRUE	FALSE	0.0220981	90	0	1	89
III	111789	C	['T']	{'T', 'C'}	0.0215054	0.989362	TRUE	FALSE	TRUE	0.0423133	93	0	2	91
III	111908	G	['A']	{'A', 'G'}	0.0106383	1	TRUE	FALSE	TRUE	0.0211628	94	0	1	93
III	111975	A	['C']	{'A', 'C'}	0.0212766	1	TRUE	FALSE	FALSE	0.0418705	94	0	2	92
III	111978	G	['T', 'A']	{'T', 'G'}	0.0212766	1	TRUE	FALSE	FALSE	0.0418705	94	0	2	92
III	112579	T	['G']	{'T', 'G'}	0.0106383	1	TRUE	FALSE	FALSE	0.0211628	94	0	1	93
III	112695	G	['A']	{'A', 'G'}	0.0107527	0.989362	TRUE	FALSE	TRUE	0.0213891	93	0	1	92
III	113348	A	['G']	{'A', 'G'}	0.117021	1	TRUE	FALSE	TRUE	0.20776	94	0	11	83
III	113570	C	['A']	{'A', 'C'}	0.0106383	1	TRUE	FALSE	FALSE	0.0211628	94	0	1	93
III	113940	G	['A']	{'A', 'G'}	0.0967742	0.989362	TRUE	FALSE	TRUE	0.175763	93	0	9	84
III	113970	T	['TA']	{'TA', 'T'}	0.0511364	0.93617	FALSE	TRUE	FALSE	0.0975974	88	1	4	83
III	113976	C	['T']	{'T', 'C'}	0.0752688	0.989362	TRUE	FALSE	TRUE	0.139959	93	0	7	86
III	114014	G	['A']	{'A', 'G'}	0.0108696	0.978723	TRUE	FALSE	TRUE	0.0216203	92	0	1	91
III	114041	T	['A']	{'T', 'A'}	0.0543478	0.978723	TRUE	FALSE	FALSE	0.10335	92	0	5	87
III	114053	T	['A']	{'T', 'A'}	0.0543478	0.978723	TRUE	FALSE	FALSE	0.10335	92	0	5	87
III	114081	C	['T']	{'T', 'C'}	0.0543478	0.978723	TRUE	FALSE	TRUE	0.10335	92	0	5	87
III	114106	C	['CT']	{'CT', 'C'}	0.0543478	0.978723	FALSE	TRUE	FALSE	0.10335	92	0	5	87
III	114125	T	['C']	{'T', 'C'}	0.0537634	0.989362	TRUE	FALSE	TRUE	0.102296	93	0	5	88
III	114132	T	['C']	{'T', 'C'}	0.0483871	0.989362	TRUE	FALSE	TRUE	0.0925894	93	1	4	88
III	114139	A	['T']	{'T', 'A'}	0.0537634	0.989362	TRUE	FALSE	FALSE	0.102296	93	0	5	88
III	114148	A	['C']	{'A', 'C'}	0.0543478	0.978723	TRUE	FALSE	FALSE	0.10335	92	0	5	87
III	114195	A	['G']	{'A', 'G'}	0.0543478	0.978723	TRUE	FALSE	TRUE	0.10335	92	0	5	87
III	114205	C	['A']	{'A', 'C'}	0.0543478	0.978723	TRUE	FALSE	FALSE	0.10335	92	0	5	87
III	114220	G	['C']	{'G', 'C'}	0.0543478	0.978723	TRUE	FALSE	FALSE	0.10335	92	0	5	87
III	114297	G	['GA']	{'GA', 'G'}	0.011236	0.946809	FALSE	TRUE	FALSE	0.022345	89	0	1	88
III	114305	G	['GA', 'GAA']	{'GA', 'G'}	0.0337079	0.946809	FALSE	TRUE	FALSE	0.0655113	89	0	3	86
III	114445	C	['T']	{'T', 'C'}	0.0549451	0.968085	TRUE	FALSE	TRUE	0.104426	91	0	5	86
III	114466	T	['A']	{'T', 'A'}	0.0549451	0.968085	TRUE	FALSE	FALSE	0.104426	91	0	5	86
III	114487	C	['T']	{'T', 'C'}	0.0549451	0.968085	TRUE	FALSE	TRUE	0.104426	91	0	5	86
III	114491	T	['G']	{'T', 'G'}	0.0549451	0.968085	TRUE	FALSE	FALSE	0.104426	91	0	5	86
III	114504	C	['CA']	{'CA', 'C'}	0.043956	0.968085	FALSE	TRUE	FALSE	0.0845122	91	2	3	86
III	114523	C	['T']	{'T', 'C'}	0.0319149	1	TRUE	FALSE	TRUE	0.0621231	94	0	3	91
III	114561	T	['C', 'A']	{'T', 'C'}	0.0555556	0.957447	TRUE	FALSE	FALSE	0.105525	90	0	5	85
III	114577	GTTC	['G']	{'G', 'GTTC'}	0.0212766	1	FALSE	TRUE	FALSE	0.0418705	94	0	2	92
III	114580	C	['G']	{'G', 'C'}	0.0957447	1	TRUE	FALSE	FALSE	0.174081	94	0	9	85
III	114590	C	['G']	{'G', 'C'}	0.0638298	1	TRUE	FALSE	FALSE	0.12015	94	0	6	88
III	114594	C	['T']	{'T', 'C'}	0.0531915	1	TRUE	FALSE	TRUE	0.101263	94	0	5	89
III	114600	C	['T']	{'T', 'C'}	0.0106383	1	TRUE	FALSE	TRUE	0.0211628	94	0	1	93
III	114608	T	['A']	{'T', 'A'}	0.0638298	1	TRUE	FALSE	FALSE	0.12015	94	0	6	88
III	114618	A	['G']	{'A', 'G'}	0.0638298	1	TRUE	FALSE	TRUE	0.12015	94	0	6	88
III	114654	G	['T']	{'T', 'G'}	0.0638298	1	TRUE	FALSE	FALSE	0.12015	94	0	6	88
III	114693	G	['A']	{'A', 'G'}	0.0638298	1	TRUE	FALSE	TRUE	0.12015	94	0	6	88
III	114725	C	['A']	{'A', 'C'}	0.0638298	1	TRUE	FALSE	FALSE	0.12015	94	0	6	88
III	114728	C	['T']	{'T', 'C'}	0.0106383	1	TRUE	FALSE	TRUE	0.0211628	94	0	1	93
III	114730	C	['A']	{'A', 'C'}	0.0531915	1	TRUE	FALSE	FALSE	0.101263	94	0	5	89
III	114765	A	['T']	{'T', 'A'}	0.0549451	0.968085	TRUE	FALSE	FALSE	0.104426	91	0	5	86
III	114781	G	['T']	{'T', 'G'}	0.0549451	0.968085	TRUE	FALSE	FALSE	0.104426	91	0	5	86
III	114782	A	['T']	{'T', 'A'}	0.0549451	0.968085	TRUE	FALSE	FALSE	0.104426	91	0	5	86
III	114844	A	['C']	{'A', 'C'}	0.10989	0.968085	TRUE	FALSE	FALSE	0.196709	91	0	10	81
III	114847	T	['A']	{'T', 'A'}	0.0879121	0.968085	TRUE	FALSE	FALSE	0.161253	91	0	8	83
III	114856	G	['A']	{'A', 'G'}	0.0549451	0.968085	TRUE	FALSE	TRUE	0.104426	91	0	5	86
III	114958	G	['A']	{'A', 'G'}	0.0549451	0.968085	TRUE	FALSE	TRUE	0.104426	91	0	5	86	[['A', '5_prime_UTR_variant', 'MODIFIER', 'C29F9.6', 'WBGene00016221', 'transcript', 'C29F9.6.1', 'protein_coding', '1/7', 'c.-117G>A', '', '', '', '', '250', '']]
III	115008	G	['A']	{'A', 'G'}	0.0638298	1	TRUE	FALSE	TRUE	0.12015	94	0	6	88	[['A', 'intron_variant', 'MODIFIER', 'C29F9.6', 'WBGene00016221', 'transcript', 'C29F9.6.1', 'protein_coding', '1/6', 'c.-102+35G>A', '', '', '', '', '', '']]
III	115021	T	['G']	{'T', 'G'}	0.0638298	1	TRUE	FALSE	FALSE	0.12015	94	0	6	88	[['G', 'intron_variant', 'MODIFIER', 'C29F9.6', 'WBGene00016221', 'transcript', 'C29F9.6.1', 'protein_coding', '1/6', 'c.-101-39T>G', '', '', '', '', '', '']]
III	115028	C	['T']	{'T', 'C'}	0.0638298	1	TRUE	FALSE	TRUE	0.12015	94	0	6	88	[['T', 'intron_variant', 'MODIFIER', 'C29F9.6', 'WBGene00016221', 'transcript', 'C29F9.6.1', 'protein_coding', '1/6', 'c.-101-32C>T', '', '', '', '', '', '']]
III	115030	A	['C']	{'A', 'C'}	0.0638298	1	TRUE	FALSE	FALSE	0.12015	94	0	6	88	[['C', 'intron_variant', 'MODIFIER', 'C29F9.6', 'WBGene00016221', 'transcript', 'C29F9.6.1', 'protein_coding', '1/6', 'c.-101-30A>C', '', '', '', '', '', '']]
III	115040	C	['A']	{'A', 'C'}	0.0638298	1	TRUE	FALSE	FALSE	0.12015	94	0	6	88	[['A', 'intron_variant', 'MODIFIER', 'C29F9.6', 'WBGene00016221', 'transcript', 'C29F9.6.1', 'protein_coding', '1/6', 'c.-101-20C>A', '', '', '', '', '', '']]
III	115043	C	['A']	{'A', 'C'}	0.0638298	1	TRUE	FALSE	FALSE	0.12015	94	0	6	88	[['A', 'intron_variant', 'MODIFIER', 'C29F9.6', 'WBGene00016221', 'transcript', 'C29F9.6.1', 'protein_coding', '1/6', 'c.-101-17C>A', '', '', '', '', '', '']]
III	115044	T	['C']	{'T', 'C'}	0.0638298	1	TRUE	FALSE	TRUE	0.12015	94	0	6	88	[['C', 'intron_variant', 'MODIFIER', 'C29F9.6', 'WBGene00016221', 'transcript', 'C29F9.6.1', 'protein_coding', '1/6', 'c.-101-16T>C', '', '', '', '', '', '']]
III	115053	A	['G']	{'A', 'G'}	0.0638298	1	TRUE	FALSE	TRUE	0.12015	94	0	6	88	[['G', 'splice_region_variant&intron_variant', 'LOW', 'C29F9.6', 'WBGene00016221', 'transcript', 'C29F9.6.1', 'protein_coding', '1/6', 'c.-101-7A>G', '', '', '', '', '', '']]
III	115077	A	['AG', 'AGG', 'AGGG']	{'AGG', 'A', 'AG'}	0.0425532	1	FALSE	TRUE	FALSE	0.0819206	94	0	4	90	[['AG', 'splice_region_variant', 'LOW', 'C29F9.6', 'WBGene00016221', 'transcript', 'C29F9.6.1', 'protein_coding', '2/7', 'c.-79dupG', '', '', '', '', '', 'INFO_REALIGN_3_PRIME'], ['AGG', 'splice_region_variant', 'LOW', 'C29F9.6', 'WBGene00016221', 'transcript', 'C29F9.6.1', 'protein_coding', '2/7', 'c.-80_-79dupGG', '', '', '', '', '', 'INFO_REALIGN_3_PRIME'], ['AGGG', 'splice_region_variant', 'L…
III	115081	G	['GGA', 'GGT', 'GGC']	{'GGT', 'G'}	0.0106383	1	FALSE	TRUE	FALSE	0.0211628	94	0	1	93	[['GGA', 'splice_region_variant', 'LOW', 'C29F9.6', 'WBGene00016221', 'transcript', 'C29F9.6.1', 'protein_coding', '2/7', 'c.-79_-78insAG', '', '', '', '', '', 'INFO_REALIGN_3_PRIME'], ['GGC', 'splice_region_variant', 'LOW', 'C29F9.6', 'WBGene00016221', 'transcript', 'C29F9.6.1', 'protein_coding', '2/7', 'c.-79_-78insCG', '', '', '', '', '', 'INFO_REALIGN_3_PRIME'], ['GGT', 'splice_region_variant…
III	115082	G	['GGT', 'GGGT']	{'GGT', 'G'}	0.0106383	1	FALSE	TRUE	FALSE	0.0211628	94	0	1	93	[['GGGT', 'splice_region_variant', 'LOW', 'C29F9.6', 'WBGene00016221', 'transcript', 'C29F9.6.1', 'protein_coding', '2/7', 'c.-79_-78insGGT', '', '', '', '', '', ''], ['GGT', 'splice_region_variant', 'LOW', 'C29F9.6', 'WBGene00016221', 'transcript', 'C29F9.6.1', 'protein_coding', '2/7', 'c.-79_-78insGT', '', '', '', '', '', ''], ['GGGT', 'splice_region_variant&intron_variant', 'LOW', 'C29F9.6', '…
III	115118	A	['G']	{'A', 'G'}	0.0645161	0.989362	TRUE	FALSE	TRUE	0.12136	93	0	6	87	[['G', '5_prime_UTR_variant', 'MODIFIER', 'C29F9.6', 'WBGene00016221', 'transcript', 'C29F9.6.2', 'protein_coding', '1/5', 'c.-90A>G', '', '', '', '', '90', ''], ['G', 'intron_variant', 'MODIFIER', 'C29F9.6', 'WBGene00016221', 'transcript', 'C29F9.6.1', 'protein_coding', '2/6', 'c.-75-15A>G', '', '', '', '', '', ''], ['G', 'intron_variant', 'MODIFIER', 'C29F9.6', 'WBGene00016221', 'transcript', '…
III	115133	A	['C']	{'A', 'C'}	0.0645161	0.989362	TRUE	FALSE	FALSE	0.12136	93	0	6	87	[['C', 'splice_region_variant', 'LOW', 'C29F9.6', 'WBGene00016221', 'transcript', 'C29F9.6.1', 'protein_coding', '3/7', 'c.-75A>C', '', '', '', '', '', ''], ['C', 'splice_region_variant', 'LOW', 'C29F9.6', 'WBGene00016221', 'transcript', 'C29F9.6.3', 'protein_coding', '2/6', 'c.-75A>C', '', '', '', '', '', ''], ['C', '5_prime_UTR_variant', 'MODIFIER', 'C29F9.6', 'WBGene00016221', 'transcript', 'C…
III	115140	T	['G']	{'T', 'G'}	0.0645161	0.989362	TRUE	FALSE	FALSE	0.12136	93	0	6	87	[['G', '5_prime_UTR_variant', 'MODIFIER', 'C29F9.6', 'WBGene00016221', 'transcript', 'C29F9.6.1', 'protein_coding', '3/7', 'c.-68T>G', '', '', '', '', '68', ''], ['G', '5_prime_UTR_variant', 'MODIFIER', 'C29F9.6', 'WBGene00016221', 'transcript', 'C29F9.6.2', 'protein_coding', '1/5', 'c.-68T>G', '', '', '', '', '68', ''], ['G', '5_prime_UTR_variant', 'MODIFIER', 'C29F9.6', 'WBGene00016221', 'trans…
III	115162	G	['T']	{'T', 'G'}	0.0645161	0.989362	TRUE	FALSE	FALSE	0.12136	93	0	6	87	[['T', '5_prime_UTR_variant', 'MODIFIER', 'C29F9.6', 'WBGene00016221', 'transcript', 'C29F9.6.1', 'protein_coding', '3/7', 'c.-46G>T', '', '', '', '', '46', ''], ['T', '5_prime_UTR_variant', 'MODIFIER', 'C29F9.6', 'WBGene00016221', 'transcript', 'C29F9.6.2', 'protein_coding', '1/5', 'c.-46G>T', '', '', '', '', '46', ''], ['T', '5_prime_UTR_variant', 'MODIFIER', 'C29F9.6', 'WBGene00016221', 'trans…
III	115165	T	['G']	{'T', 'G'}	0.0645161	0.989362	TRUE	FALSE	FALSE	0.12136	93	0	6	87	[['G', '5_prime_UTR_variant', 'MODIFIER', 'C29F9.6', 'WBGene00016221', 'transcript', 'C29F9.6.1', 'protein_coding', '3/7', 'c.-43T>G', '', '', '', '', '43', ''], ['G', '5_prime_UTR_variant', 'MODIFIER', 'C29F9.6', 'WBGene00016221', 'transcript', 'C29F9.6.2', 'protein_coding', '1/5', 'c.-43T>G', '', '', '', '', '43', ''], ['G', '5_prime_UTR_variant', 'MODIFIER', 'C29F9.6', 'WBGene00016221', 'trans…
III	115252	C	['T']	{'T', 'C'}	0.032967	0.968085	TRUE	FALSE	TRUE	0.0641127	91	0	3	88	[['T', 'intron_variant', 'MODIFIER', 'C29F9.6', 'WBGene00016221', 'transcript', 'C29F9.6.1', 'protein_coding', '3/6', 'c.25+20C>T', '', '', '', '', '', ''], ['T', 'intron_variant', 'MODIFIER', 'C29F9.6', 'WBGene00016221', 'transcript', 'C29F9.6.2', 'protein_coding', '1/4', 'c.25+20C>T', '', '', '', '', '', ''], ['T', 'intron_variant', 'MODIFIER', 'C29F9.6', 'WBGene00016221', 'transcript', 'C29F9.…
III	115271	A	['T']	{'T', 'A'}	0.0645161	0.989362	TRUE	FALSE	FALSE	0.12136	93	0	6	87	[['T', 'splice_region_variant&intron_variant', 'LOW', 'C29F9.6', 'WBGene00016221', 'transcript', 'C29F9.6.1', 'protein_coding', '3/6', 'c.26-7A>T', '', '', '', '', '', ''], ['T', 'splice_region_variant&intron_variant', 'LOW', 'C29F9.6', 'WBGene00016221', 'transcript', 'C29F9.6.2', 'protein_coding', '1/4', 'c.26-7A>T', '', '', '', '', '', ''], ['T', 'splice_region_variant&intron_variant', 'LOW', '…
III	115274	T	['C']	{'T', 'C'}	0.0645161	0.989362	TRUE	FALSE	TRUE	0.12136	93	0	6	87	[['C', 'splice_region_variant&intron_variant', 'LOW', 'C29F9.6', 'WBGene00016221', 'transcript', 'C29F9.6.1', 'protein_coding', '3/6', 'c.26-4T>C', '', '', '', '', '', ''], ['C', 'splice_region_variant&intron_variant', 'LOW', 'C29F9.6', 'WBGene00016221', 'transcript', 'C29F9.6.2', 'protein_coding', '1/4', 'c.26-4T>C', '', '', '', '', '', ''], ['C', 'splice_region_variant&intron_variant', 'LOW', '…
III	115278	C	['A']	{'A', 'C'}	0.0549451	0.968085	TRUE	FALSE	FALSE	0.104426	91	0	5	86	[['A', 'missense_variant&splice_region_variant', 'MODERATE', 'C29F9.6', 'WBGene00016221', 'transcript', 'C29F9.6.1', 'protein_coding', '4/7', 'c.26C>A', 'p.Thr9Asn', '198/1020', '26/723', '9/240', '', ''], ['A', 'missense_variant&splice_region_variant', 'MODERATE', 'C29F9.6', 'WBGene00016221', 'transcript', 'C29F9.6.2', 'protein_coding', '2/5', 'c.26C>A', 'p.Thr9Asn', '173/995', '26/723', '9/240'…
III	115283	C	['A']	{'A', 'C'}	0.0645161	0.989362	TRUE	FALSE	FALSE	0.12136	93	0	6	87	[['A', 'missense_variant', 'MODERATE', 'C29F9.6', 'WBGene00016221', 'transcript', 'C29F9.6.1', 'protein_coding', '4/7', 'c.31C>A', 'p.His11Asn', '203/1020', '31/723', '11/240', '', ''], ['A', 'missense_variant', 'MODERATE', 'C29F9.6', 'WBGene00016221', 'transcript', 'C29F9.6.2', 'protein_coding', '2/5', 'c.31C>A', 'p.His11Asn', '178/995', '31/723', '11/240', '', ''], ['A', 'missense_variant', 'MO…
III	115297	T	['C']	{'T', 'C'}	0.0645161	0.989362	TRUE	FALSE	TRUE	0.12136	93	0	6	87	[['C', 'synonymous_variant', 'LOW', 'C29F9.6', 'WBGene00016221', 'transcript', 'C29F9.6.1', 'protein_coding', '4/7', 'c.45T>C', 'p.Ile15Ile', '217/1020', '45/723', '15/240', '', ''], ['C', 'synonymous_variant', 'LOW', 'C29F9.6', 'WBGene00016221', 'transcript', 'C29F9.6.2', 'protein_coding', '2/5', 'c.45T>C', 'p.Ile15Ile', '192/995', '45/723', '15/240', '', ''], ['C', 'synonymous_variant', 'LOW', …
III	115317	C	['T']	{'T', 'C'}	0.0537634	0.989362	TRUE	FALSE	TRUE	0.102296	93	0	5	88	[['T', 'missense_variant', 'MODERATE', 'C29F9.6', 'WBGene00016221', 'transcript', 'C29F9.6.1', 'protein_coding', '4/7', 'c.65C>T', 'p.Ser22Phe', '237/1020', '65/723', '22/240', '', ''], ['T', 'missense_variant', 'MODERATE', 'C29F9.6', 'WBGene00016221', 'transcript', 'C29F9.6.2', 'protein_coding', '2/5', 'c.65C>T', 'p.Ser22Phe', '212/995', '65/723', '22/240', '', ''], ['T', 'missense_variant', 'MO…
III	115336	A	['T']	{'T', 'A'}	0.0537634	0.989362	TRUE	FALSE	FALSE	0.102296	93	0	5	88	[['T', 'synonymous_variant', 'LOW', 'C29F9.6', 'WBGene00016221', 'transcript', 'C29F9.6.1', 'protein_coding', '4/7', 'c.84A>T', 'p.Leu28Leu', '256/1020', '84/723', '28/240', '', ''], ['T', 'synonymous_variant', 'LOW', 'C29F9.6', 'WBGene00016221', 'transcript', 'C29F9.6.2', 'protein_coding', '2/5', 'c.84A>T', 'p.Leu28Leu', '231/995', '84/723', '28/240', '', ''], ['T', 'synonymous_variant', 'LOW', …
III	115339	T	['G']	{'T', 'G'}	0.11828	0.989362	TRUE	FALSE	FALSE	0.209706	93	0	11	82	[['G', 'synonymous_variant', 'LOW', 'C29F9.6', 'WBGene00016221', 'transcript', 'C29F9.6.1', 'protein_coding', '4/7', 'c.87T>G', 'p.Ser29Ser', '259/1020', '87/723', '29/240', '', ''], ['G', 'synonymous_variant', 'LOW', 'C29F9.6', 'WBGene00016221', 'transcript', 'C29F9.6.2', 'protein_coding', '2/5', 'c.87T>G', 'p.Ser29Ser', '234/995', '87/723', '29/240', '', ''], ['G', 'synonymous_variant', 'LOW', …
III	115342	T	['A']	{'T', 'A'}	0.11828	0.989362	TRUE	FALSE	FALSE	0.209706	93	0	11	82	[['A', 'synonymous_variant', 'LOW', 'C29F9.6', 'WBGene00016221', 'transcript', 'C29F9.6.1', 'protein_coding', '4/7', 'c.90T>A', 'p.Thr30Thr', '262/1020', '90/723', '30/240', '', ''], ['A', 'synonymous_variant', 'LOW', 'C29F9.6', 'WBGene00016221', 'transcript', 'C29F9.6.2', 'protein_coding', '2/5', 'c.90T>A', 'p.Thr30Thr', '237/995', '90/723', '30/240', '', ''], ['A', 'synonymous_variant', 'LOW', …
III	115395	A	['G']	{'A', 'G'}	0.150538	0.989362	TRUE	FALSE	TRUE	0.257135	93	0	14	79	[['G', 'splice_region_variant&intron_variant', 'LOW', 'C29F9.6', 'WBGene00016221', 'transcript', 'C29F9.6.1', 'protein_coding', '4/6', 'c.135+8A>G', '', '', '', '', '', ''], ['G', 'splice_region_variant&intron_variant', 'LOW', 'C29F9.6', 'WBGene00016221', 'transcript', 'C29F9.6.2', 'protein_coding', '2/4', 'c.135+8A>G', '', '', '', '', '', ''], ['G', 'splice_region_variant&intron_variant', 'LOW',…
III	115402	A	['T']	{'T', 'A'}	0.0645161	0.989362	TRUE	FALSE	FALSE	0.12136	93	0	6	87	[['T', 'intron_variant', 'MODIFIER', 'C29F9.6', 'WBGene00016221', 'transcript', 'C29F9.6.1', 'protein_coding', '4/6', 'c.135+15A>T', '', '', '', '', '', ''], ['T', 'intron_variant', 'MODIFIER', 'C29F9.6', 'WBGene00016221', 'transcript', 'C29F9.6.2', 'protein_coding', '2/4', 'c.135+15A>T', '', '', '', '', '', ''], ['T', 'intron_variant', 'MODIFIER', 'C29F9.6', 'WBGene00016221', 'transcript', 'C29F…
III	115423	C	['T']	{'T', 'C'}	0.0638298	1	TRUE	FALSE	TRUE	0.12015	94	0	6	88	[['T', 'intron_variant', 'MODIFIER', 'C29F9.6', 'WBGene00016221', 'transcript', 'C29F9.6.1', 'protein_coding', '4/6', 'c.135+36C>T', '', '', '', '', '', ''], ['T', 'intron_variant', 'MODIFIER', 'C29F9.6', 'WBGene00016221', 'transcript', 'C29F9.6.2', 'protein_coding', '2/4', 'c.135+36C>T', '', '', '', '', '', ''], ['T', 'intron_variant', 'MODIFIER', 'C29F9.6', 'WBGene00016221', 'transcript', 'C29F…
III	115429	G	['T']	{'T', 'G'}	0.0638298	1	TRUE	FALSE	FALSE	0.12015	94	0	6	88	[['T', 'intron_variant', 'MODIFIER', 'C29F9.6', 'WBGene00016221', 'transcript', 'C29F9.6.1', 'protein_coding', '4/6', 'c.135+42G>T', '', '', '', '', '', ''], ['T', 'intron_variant', 'MODIFIER', 'C29F9.6', 'WBGene00016221', 'transcript', 'C29F9.6.2', 'protein_coding', '2/4', 'c.135+42G>T', '', '', '', '', '', ''], ['T', 'intron_variant', 'MODIFIER', 'C29F9.6', 'WBGene00016221', 'transcript', 'C29F…
III	115433	G	['T']	{'T', 'G'}	0.0638298	1	TRUE	FALSE	FALSE	0.12015	94	0	6	88	[['T', 'intron_variant', 'MODIFIER', 'C29F9.6', 'WBGene00016221', 'transcript', 'C29F9.6.1', 'protein_coding', '4/6', 'c.135+46G>T', '', '', '', '', '', ''], ['T', 'intron_variant', 'MODIFIER', 'C29F9.6', 'WBGene00016221', 'transcript', 'C29F9.6.2', 'protein_coding', '2/4', 'c.135+46G>T', '', '', '', '', '', ''], ['T', 'intron_variant', 'MODIFIER', 'C29F9.6', 'WBGene00016221', 'transcript', 'C29F…
III	115436	G	['A']	{'A', 'G'}	0.0638298	1	TRUE	FALSE	TRUE	0.12015	94	0	6	88	[['A', 'intron_variant', 'MODIFIER', 'C29F9.6', 'WBGene00016221', 'transcript', 'C29F9.6.1', 'protein_coding', '4/6', 'c.135+49G>A', '', '', '', '', '', ''], ['A', 'intron_variant', 'MODIFIER', 'C29F9.6', 'WBGene00016221', 'transcript', 'C29F9.6.2', 'protein_coding', '2/4', 'c.135+49G>A', '', '', '', '', '', ''], ['A', 'intron_variant', 'MODIFIER', 'C29F9.6', 'WBGene00016221', 'transcript', 'C29F…
III	115441	C	['G']	{'G', 'C'}	0.0638298	1	TRUE	FALSE	FALSE	0.12015	94	0	6	88	[['G', 'intron_variant', 'MODIFIER', 'C29F9.6', 'WBGene00016221', 'transcript', 'C29F9.6.1', 'protein_coding', '4/6', 'c.135+54C>G', '', '', '', '', '', ''], ['G', 'intron_variant', 'MODIFIER', 'C29F9.6', 'WBGene00016221', 'transcript', 'C29F9.6.2', 'protein_coding', '2/4', 'c.135+54C>G', '', '', '', '', '', ''], ['G', 'intron_variant', 'MODIFIER', 'C29F9.6', 'WBGene00016221', 'transcript', 'C29F…
III	115506	A	['G']	{'A', 'G'}	0.0638298	1	TRUE	FALSE	TRUE	0.12015	94	0	6	88	[['G', 'intron_variant', 'MODIFIER', 'C29F9.6', 'WBGene00016221', 'transcript', 'C29F9.6.1', 'protein_coding', '4/6', 'c.135+119A>G', '', '', '', '', '', ''], ['G', 'intron_variant', 'MODIFIER', 'C29F9.6', 'WBGene00016221', 'transcript', 'C29F9.6.2', 'protein_coding', '2/4', 'c.135+119A>G', '', '', '', '', '', ''], ['G', 'intron_variant', 'MODIFIER', 'C29F9.6', 'WBGene00016221', 'transcript', 'C2…
III	115549	T	['G']	{'T', 'G'}	0.0212766	1	TRUE	FALSE	FALSE	0.0418705	94	0	2	92	[['G', 'intron_variant', 'MODIFIER', 'C29F9.6', 'WBGene00016221', 'transcript', 'C29F9.6.1', 'protein_coding', '4/6', 'c.135+162T>G', '', '', '', '', '', ''], ['G', 'intron_variant', 'MODIFIER', 'C29F9.6', 'WBGene00016221', 'transcript', 'C29F9.6.2', 'protein_coding', '2/4', 'c.135+162T>G', '', '', '', '', '', ''], ['G', 'intron_variant', 'MODIFIER', 'C29F9.6', 'WBGene00016221', 'transcript', 'C2…
III	115561	G	['A']	{'A', 'G'}	0.0638298	1	TRUE	FALSE	TRUE	0.12015	94	0	6	88	[['A', 'intron_variant', 'MODIFIER', 'C29F9.6', 'WBGene00016221', 'transcript', 'C29F9.6.1', 'protein_coding', '4/6', 'c.135+174G>A', '', '', '', '', '', ''], ['A', 'intron_variant', 'MODIFIER', 'C29F9.6', 'WBGene00016221', 'transcript', 'C29F9.6.2', 'protein_coding', '2/4', 'c.135+174G>A', '', '', '', '', '', ''], ['A', 'intron_variant', 'MODIFIER', 'C29F9.6', 'WBGene00016221', 'transcript', 'C2…
III	115565	G	['A']	{'A', 'G'}	0.0638298	1	TRUE	FALSE	TRUE	0.12015	94	0	6	88	[['A', 'intron_variant', 'MODIFIER', 'C29F9.6', 'WBGene00016221', 'transcript', 'C29F9.6.1', 'protein_coding', '4/6', 'c.135+178G>A', '', '', '', '', '', ''], ['A', 'intron_variant', 'MODIFIER', 'C29F9.6', 'WBGene00016221', 'transcript', 'C29F9.6.2', 'protein_coding', '2/4', 'c.135+178G>A', '', '', '', '', '', ''], ['A', 'intron_variant', 'MODIFIER', 'C29F9.6', 'WBGene00016221', 'transcript', 'C2…
III	115586	G	['T']	{'T', 'G'}	0.0531915	1	TRUE	FALSE	FALSE	0.101263	94	0	5	89	[['T', 'intron_variant', 'MODIFIER', 'C29F9.6', 'WBGene00016221', 'transcript', 'C29F9.6.1', 'protein_coding', '4/6', 'c.135+199G>T', '', '', '', '', '', ''], ['T', 'intron_variant', 'MODIFIER', 'C29F9.6', 'WBGene00016221', 'transcript', 'C29F9.6.2', 'protein_coding', '2/4', 'c.135+199G>T', '', '', '', '', '', ''], ['T', 'intron_variant', 'MODIFIER', 'C29F9.6', 'WBGene00016221', 'transcript', 'C2…
III	115600	A	['C']	{'A', 'C'}	0.0568182	0.93617	TRUE	FALSE	FALSE	0.107792	88	0	5	83	[['C', 'intron_variant', 'MODIFIER', 'C29F9.6', 'WBGene00016221', 'transcript', 'C29F9.6.1', 'protein_coding', '4/6', 'c.136-198A>C', '', '', '', '', '', ''], ['C', 'intron_variant', 'MODIFIER', 'C29F9.6', 'WBGene00016221', 'transcript', 'C29F9.6.2', 'protein_coding', '2/4', 'c.136-198A>C', '', '', '', '', '', ''], ['C', 'intron_variant', 'MODIFIER', 'C29F9.6', 'WBGene00016221', 'transcript', 'C2…
III	115606	G	['T']	{'T', 'G'}	0.0106383	1	TRUE	FALSE	FALSE	0.0211628	94	0	1	93	[['T', 'intron_variant', 'MODIFIER', 'C29F9.6', 'WBGene00016221', 'transcript', 'C29F9.6.1', 'protein_coding', '4/6', 'c.136-192G>T', '', '', '', '', '', ''], ['T', 'intron_variant', 'MODIFIER', 'C29F9.6', 'WBGene00016221', 'transcript', 'C29F9.6.2', 'protein_coding', '2/4', 'c.136-192G>T', '', '', '', '', '', ''], ['T', 'intron_variant', 'MODIFIER', 'C29F9.6', 'WBGene00016221', 'transcript', 'C2…
III	115627	G	['A']	{'A', 'G'}	0.0638298	1	TRUE	FALSE	TRUE	0.12015	94	0	6	88	[['A', 'intron_variant', 'MODIFIER', 'C29F9.6', 'WBGene00016221', 'transcript', 'C29F9.6.1', 'protein_coding', '4/6', 'c.136-171G>A', '', '', '', '', '', ''], ['A', 'intron_variant', 'MODIFIER', 'C29F9.6', 'WBGene00016221', 'transcript', 'C29F9.6.2', 'protein_coding', '2/4', 'c.136-171G>A', '', '', '', '', '', ''], ['A', 'intron_variant', 'MODIFIER', 'C29F9.6', 'WBGene00016221', 'transcript', 'C2…
III	115640	G	['A']	{'A', 'G'}	0.0638298	1	TRUE	FALSE	TRUE	0.12015	94	0	6	88	[['A', 'intron_variant', 'MODIFIER', 'C29F9.6', 'WBGene00016221', 'transcript', 'C29F9.6.1', 'protein_coding', '4/6', 'c.136-158G>A', '', '', '', '', '', ''], ['A', 'intron_variant', 'MODIFIER', 'C29F9.6', 'WBGene00016221', 'transcript', 'C29F9.6.2', 'protein_coding', '2/4', 'c.136-158G>A', '', '', '', '', '', ''], ['A', 'intron_variant', 'MODIFIER', 'C29F9.6', 'WBGene00016221', 'transcript', 'C2…
III	115645	C	['G']	{'G', 'C'}	0.0531915	1	TRUE	FALSE	FALSE	0.101263	94	0	5	89	[['G', 'intron_variant', 'MODIFIER', 'C29F9.6', 'WBGene00016221', 'transcript', 'C29F9.6.1', 'protein_coding', '4/6', 'c.136-153C>G', '', '', '', '', '', ''], ['G', 'intron_variant', 'MODIFIER', 'C29F9.6', 'WBGene00016221', 'transcript', 'C29F9.6.2', 'protein_coding', '2/4', 'c.136-153C>G', '', '', '', '', '', ''], ['G', 'intron_variant', 'MODIFIER', 'C29F9.6', 'WBGene00016221', 'transcript', 'C2…
III	115648	G	['A']	{'A', 'G'}	0.0638298	1	TRUE	FALSE	TRUE	0.12015	94	0	6	88	[['A', 'intron_variant', 'MODIFIER', 'C29F9.6', 'WBGene00016221', 'transcript', 'C29F9.6.1', 'protein_coding', '4/6', 'c.136-150G>A', '', '', '', '', '', ''], ['A', 'intron_variant', 'MODIFIER', 'C29F9.6', 'WBGene00016221', 'transcript', 'C29F9.6.2', 'protein_coding', '2/4', 'c.136-150G>A', '', '', '', '', '', ''], ['A', 'intron_variant', 'MODIFIER', 'C29F9.6', 'WBGene00016221', 'transcript', 'C2…
III	115654	A	['T']	{'T', 'A'}	0.0638298	1	TRUE	FALSE	FALSE	0.12015	94	0	6	88	[['T', 'intron_variant', 'MODIFIER', 'C29F9.6', 'WBGene00016221', 'transcript', 'C29F9.6.1', 'protein_coding', '4/6', 'c.136-144A>T', '', '', '', '', '', ''], ['T', 'intron_variant', 'MODIFIER', 'C29F9.6', 'WBGene00016221', 'transcript', 'C29F9.6.2', 'protein_coding', '2/4', 'c.136-144A>T', '', '', '', '', '', ''], ['T', 'intron_variant', 'MODIFIER', 'C29F9.6', 'WBGene00016221', 'transcript', 'C2…
III	115669	C	['A']	{'A', 'C'}	0.0638298	1	TRUE	FALSE	FALSE	0.12015	94	0	6	88	[['A', 'intron_variant', 'MODIFIER', 'C29F9.6', 'WBGene00016221', 'transcript', 'C29F9.6.1', 'protein_coding', '4/6', 'c.136-129C>A', '', '', '', '', '', ''], ['A', 'intron_variant', 'MODIFIER', 'C29F9.6', 'WBGene00016221', 'transcript', 'C29F9.6.2', 'protein_coding', '2/4', 'c.136-129C>A', '', '', '', '', '', ''], ['A', 'intron_variant', 'MODIFIER', 'C29F9.6', 'WBGene00016221', 'transcript', 'C2…
III	115675	C	['T']	{'T', 'C'}	0.0638298	1	TRUE	FALSE	TRUE	0.12015	94	0	6	88	[['T', 'intron_variant', 'MODIFIER', 'C29F9.6', 'WBGene00016221', 'transcript', 'C29F9.6.1', 'protein_coding', '4/6', 'c.136-123C>T', '', '', '', '', '', ''], ['T', 'intron_variant', 'MODIFIER', 'C29F9.6', 'WBGene00016221', 'transcript', 'C29F9.6.2', 'protein_coding', '2/4', 'c.136-123C>T', '', '', '', '', '', ''], ['T', 'intron_variant', 'MODIFIER', 'C29F9.6', 'WBGene00016221', 'transcript', 'C2…
III	115676	A	['T']	{'T', 'A'}	0.117021	1	TRUE	FALSE	FALSE	0.20776	94	0	11	83	[['T', 'intron_variant', 'MODIFIER', 'C29F9.6', 'WBGene00016221', 'transcript', 'C29F9.6.1', 'protein_coding', '4/6', 'c.136-122A>T', '', '', '', '', '', ''], ['T', 'intron_variant', 'MODIFIER', 'C29F9.6', 'WBGene00016221', 'transcript', 'C29F9.6.2', 'protein_coding', '2/4', 'c.136-122A>T', '', '', '', '', '', ''], ['T', 'intron_variant', 'MODIFIER', 'C29F9.6', 'WBGene00016221', 'transcript', 'C2…
III	115679	T	['C']	{'T', 'C'}	0.0638298	1	TRUE	FALSE	TRUE	0.12015	94	0	6	88	[['C', 'intron_variant', 'MODIFIER', 'C29F9.6', 'WBGene00016221', 'transcript', 'C29F9.6.1', 'protein_coding', '4/6', 'c.136-119T>C', '', '', '', '', '', ''], ['C', 'intron_variant', 'MODIFIER', 'C29F9.6', 'WBGene00016221', 'transcript', 'C29F9.6.2', 'protein_coding', '2/4', 'c.136-119T>C', '', '', '', '', '', ''], ['C', 'intron_variant', 'MODIFIER', 'C29F9.6', 'WBGene00016221', 'transcript', 'C2…
III	115691	T	['A']	{'T', 'A'}	0.0531915	1	TRUE	FALSE	FALSE	0.101263	94	0	5	89	[['A', 'intron_variant', 'MODIFIER', 'C29F9.6', 'WBGene00016221', 'transcript', 'C29F9.6.1', 'protein_coding', '4/6', 'c.136-107T>A', '', '', '', '', '', ''], ['A', 'intron_variant', 'MODIFIER', 'C29F9.6', 'WBGene00016221', 'transcript', 'C29F9.6.2', 'protein_coding', '2/4', 'c.136-107T>A', '', '', '', '', '', ''], ['A', 'intron_variant', 'MODIFIER', 'C29F9.6', 'WBGene00016221', 'transcript', 'C2…
III	115703	A	['G']	{'A', 'G'}	0.0638298	1	TRUE	FALSE	TRUE	0.12015	94	0	6	88	[['G', 'intron_variant', 'MODIFIER', 'C29F9.6', 'WBGene00016221', 'transcript', 'C29F9.6.1', 'protein_coding', '4/6', 'c.136-95A>G', '', '', '', '', '', ''], ['G', 'intron_variant', 'MODIFIER', 'C29F9.6', 'WBGene00016221', 'transcript', 'C29F9.6.2', 'protein_coding', '2/4', 'c.136-95A>G', '', '', '', '', '', ''], ['G', 'intron_variant', 'MODIFIER', 'C29F9.6', 'WBGene00016221', 'transcript', 'C29F…
III	115713	T	['A']	{'T', 'A'}	0.0638298	1	TRUE	FALSE	FALSE	0.12015	94	0	6	88	[['A', 'intron_variant', 'MODIFIER', 'C29F9.6', 'WBGene00016221', 'transcript', 'C29F9.6.1', 'protein_coding', '4/6', 'c.136-85T>A', '', '', '', '', '', ''], ['A', 'intron_variant', 'MODIFIER', 'C29F9.6', 'WBGene00016221', 'transcript', 'C29F9.6.2', 'protein_coding', '2/4', 'c.136-85T>A', '', '', '', '', '', ''], ['A', 'intron_variant', 'MODIFIER', 'C29F9.6', 'WBGene00016221', 'transcript', 'C29F…
III	115718	T	['C']	{'T', 'C'}	0.0638298	1	TRUE	FALSE	TRUE	0.12015	94	0	6	88	[['C', 'intron_variant', 'MODIFIER', 'C29F9.6', 'WBGene00016221', 'transcript', 'C29F9.6.1', 'protein_coding', '4/6', 'c.136-80T>C', '', '', '', '', '', ''], ['C', 'intron_variant', 'MODIFIER', 'C29F9.6', 'WBGene00016221', 'transcript', 'C29F9.6.2', 'protein_coding', '2/4', 'c.136-80T>C', '', '', '', '', '', ''], ['C', 'intron_variant', 'MODIFIER', 'C29F9.6', 'WBGene00016221', 'transcript', 'C29F…
III	115720	A	['T']	{'T', 'A'}	0.0638298	1	TRUE	FALSE	FALSE	0.12015	94	0	6	88	[['T', 'intron_variant', 'MODIFIER', 'C29F9.6', 'WBGene00016221', 'transcript', 'C29F9.6.1', 'protein_coding', '4/6', 'c.136-78A>T', '', '', '', '', '', ''], ['T', 'intron_variant', 'MODIFIER', 'C29F9.6', 'WBGene00016221', 'transcript', 'C29F9.6.2', 'protein_coding', '2/4', 'c.136-78A>T', '', '', '', '', '', ''], ['T', 'intron_variant', 'MODIFIER', 'C29F9.6', 'WBGene00016221', 'transcript', 'C29F…
III	115732	A	['G']	{'A', 'G'}	0.117021	1	TRUE	FALSE	TRUE	0.20776	94	0	11	83	[['G', 'intron_variant', 'MODIFIER', 'C29F9.6', 'WBGene00016221', 'transcript', 'C29F9.6.1', 'protein_coding', '4/6', 'c.136-66A>G', '', '', '', '', '', ''], ['G', 'intron_variant', 'MODIFIER', 'C29F9.6', 'WBGene00016221', 'transcript', 'C29F9.6.2', 'protein_coding', '2/4', 'c.136-66A>G', '', '', '', '', '', ''], ['G', 'intron_variant', 'MODIFIER', 'C29F9.6', 'WBGene00016221', 'transcript', 'C29F…
III	115745	G	['T']	{'T', 'G'}	0.0638298	1	TRUE	FALSE	FALSE	0.12015	94	0	6	88	[['T', 'intron_variant', 'MODIFIER', 'C29F9.6', 'WBGene00016221', 'transcript', 'C29F9.6.1', 'protein_coding', '4/6', 'c.136-53G>T', '', '', '', '', '', ''], ['T', 'intron_variant', 'MODIFIER', 'C29F9.6', 'WBGene00016221', 'transcript', 'C29F9.6.2', 'protein_coding', '2/4', 'c.136-53G>T', '', '', '', '', '', ''], ['T', 'intron_variant', 'MODIFIER', 'C29F9.6', 'WBGene00016221', 'transcript', 'C29F…
III	115754	T	['C']	{'T', 'C'}	0.0319149	1	TRUE	FALSE	TRUE	0.0621231	94	0	3	91	[['C', 'intron_variant', 'MODIFIER', 'C29F9.6', 'WBGene00016221', 'transcript', 'C29F9.6.1', 'protein_coding', '4/6', 'c.136-44T>C', '', '', '', '', '', ''], ['C', 'intron_variant', 'MODIFIER', 'C29F9.6', 'WBGene00016221', 'transcript', 'C29F9.6.2', 'protein_coding', '2/4', 'c.136-44T>C', '', '', '', '', '', ''], ['C', 'intron_variant', 'MODIFIER', 'C29F9.6', 'WBGene00016221', 'transcript', 'C29F…
III	115774	C	['A']	{'A', 'C'}	0.0638298	1	TRUE	FALSE	FALSE	0.12015	94	0	6	88	[['A', 'intron_variant', 'MODIFIER', 'C29F9.6', 'WBGene00016221', 'transcript', 'C29F9.6.1', 'protein_coding', '4/6', 'c.136-24C>A', '', '', '', '', '', ''], ['A', 'intron_variant', 'MODIFIER', 'C29F9.6', 'WBGene00016221', 'transcript', 'C29F9.6.2', 'protein_coding', '2/4', 'c.136-24C>A', '', '', '', '', '', ''], ['A', 'intron_variant', 'MODIFIER', 'C29F9.6', 'WBGene00016221', 'transcript', 'C29F…
III	115776	A	['G']	{'A', 'G'}	0.148936	1	TRUE	FALSE	TRUE	0.254864	94	0	14	80	[['G', 'intron_variant', 'MODIFIER', 'C29F9.6', 'WBGene00016221', 'transcript', 'C29F9.6.1', 'protein_coding', '4/6', 'c.136-22A>G', '', '', '', '', '', ''], ['G', 'intron_variant', 'MODIFIER', 'C29F9.6', 'WBGene00016221', 'transcript', 'C29F9.6.2', 'protein_coding', '2/4', 'c.136-22A>G', '', '', '', '', '', ''], ['G', 'intron_variant', 'MODIFIER', 'C29F9.6', 'WBGene00016221', 'transcript', 'C29F…
III	115789	A	['AT']	{'A', 'AT'}	0.0531915	1	FALSE	TRUE	FALSE	0.101263	94	0	5	89	[['AT', 'splice_region_variant&intron_variant', 'LOW', 'C29F9.6', 'WBGene00016221', 'transcript', 'C29F9.6.1', 'protein_coding', '4/6', 'c.136-9_136-8insT', '', '', '', '', '', ''], ['AT', 'splice_region_variant&intron_variant', 'LOW', 'C29F9.6', 'WBGene00016221', 'transcript', 'C29F9.6.2', 'protein_coding', '2/4', 'c.136-9_136-8insT', '', '', '', '', '', ''], ['AT', 'splice_region_variant&intron…
III	115800	C	['A']	{'A', 'C'}	0.0638298	1	TRUE	FALSE	FALSE	0.12015	94	0	6	88	[['A', 'splice_region_variant&synonymous_variant', 'LOW', 'C29F9.6', 'WBGene00016221', 'transcript', 'C29F9.6.1', 'protein_coding', '5/7', 'c.138C>A', 'p.Ile46Ile', '310/1020', '138/723', '46/240', '', ''], ['A', 'splice_region_variant&synonymous_variant', 'LOW', 'C29F9.6', 'WBGene00016221', 'transcript', 'C29F9.6.2', 'protein_coding', '3/5', 'c.138C>A', 'p.Ile46Ile', '285/995', '138/723', '46/24…
III	115801	G	['A', 'T']	{'T', 'A', 'G'}	0.117021	1	TRUE	FALSE	FALSE	0.20776	94	0	11	83	[['A', 'missense_variant', 'MODERATE', 'C29F9.6', 'WBGene00016221', 'transcript', 'C29F9.6.1', 'protein_coding', '5/7', 'c.139G>A', 'p.Ala47Thr', '311/1020', '139/723', '47/240', '', ''], ['T', 'missense_variant', 'MODERATE', 'C29F9.6', 'WBGene00016221', 'transcript', 'C29F9.6.1', 'protein_coding', '5/7', 'c.139G>T', 'p.Ala47Ser', '311/1020', '139/723', '47/240', '', ''], ['A', 'missense_variant'…
III	115804	G	['C']	{'G', 'C'}	0.0638298	1	TRUE	FALSE	FALSE	0.12015	94	0	6	88	[['C', 'missense_variant', 'MODERATE', 'C29F9.6', 'WBGene00016221', 'transcript', 'C29F9.6.1', 'protein_coding', '5/7', 'c.142G>C', 'p.Glu48Gln', '314/1020', '142/723', '48/240', '', ''], ['C', 'missense_variant', 'MODERATE', 'C29F9.6', 'WBGene00016221', 'transcript', 'C29F9.6.2', 'protein_coding', '3/5', 'c.142G>C', 'p.Glu48Gln', '289/995', '142/723', '48/240', '', ''], ['C', 'missense_variant',…
III	115809	A	['G']	{'A', 'G'}	0.0638298	1	TRUE	FALSE	TRUE	0.12015	94	0	6	88	[['G', 'synonymous_variant', 'LOW', 'C29F9.6', 'WBGene00016221', 'transcript', 'C29F9.6.1', 'protein_coding', '5/7', 'c.147A>G', 'p.Gln49Gln', '319/1020', '147/723', '49/240', '', ''], ['G', 'synonymous_variant', 'LOW', 'C29F9.6', 'WBGene00016221', 'transcript', 'C29F9.6.2', 'protein_coding', '3/5', 'c.147A>G', 'p.Gln49Gln', '294/995', '147/723', '49/240', '', ''], ['G', 'synonymous_variant', 'LO…
III	115812	T	['C']	{'T', 'C'}	0.0638298	1	TRUE	FALSE	TRUE	0.12015	94	0	6	88	[['C', 'synonymous_variant', 'LOW', 'C29F9.6', 'WBGene00016221', 'transcript', 'C29F9.6.1', 'protein_coding', '5/7', 'c.150T>C', 'p.Cys50Cys', '322/1020', '150/723', '50/240', '', ''], ['C', 'synonymous_variant', 'LOW', 'C29F9.6', 'WBGene00016221', 'transcript', 'C29F9.6.2', 'protein_coding', '3/5', 'c.150T>C', 'p.Cys50Cys', '297/995', '150/723', '50/240', '', ''], ['C', 'synonymous_variant', 'LO…
III	115815	T	['A']	{'T', 'A'}	0.0638298	1	TRUE	FALSE	FALSE	0.12015	94	0	6	88	[['A', 'synonymous_variant', 'LOW', 'C29F9.6', 'WBGene00016221', 'transcript', 'C29F9.6.1', 'protein_coding', '5/7', 'c.153T>A', 'p.Pro51Pro', '325/1020', '153/723', '51/240', '', ''], ['A', 'synonymous_variant', 'LOW', 'C29F9.6', 'WBGene00016221', 'transcript', 'C29F9.6.2', 'protein_coding', '3/5', 'c.153T>A', 'p.Pro51Pro', '300/995', '153/723', '51/240', '', ''], ['A', 'synonymous_variant', 'LO…
III	115820	C	['A']	{'A', 'C'}	0.0638298	1	TRUE	FALSE	FALSE	0.12015	94	0	6	88	[['A', 'missense_variant', 'MODERATE', 'C29F9.6', 'WBGene00016221', 'transcript', 'C29F9.6.1', 'protein_coding', '5/7', 'c.158C>A', 'p.Pro53Gln', '330/1020', '158/723', '53/240', '', ''], ['A', 'missense_variant', 'MODERATE', 'C29F9.6', 'WBGene00016221', 'transcript', 'C29F9.6.2', 'protein_coding', '3/5', 'c.158C>A', 'p.Pro53Gln', '305/995', '158/723', '53/240', '', ''], ['A', 'missense_variant',…
III	115822	C	['A']	{'A', 'C'}	0.0638298	1	TRUE	FALSE	FALSE	0.12015	94	0	6	88	[['A', 'missense_variant', 'MODERATE', 'C29F9.6', 'WBGene00016221', 'transcript', 'C29F9.6.1', 'protein_coding', '5/7', 'c.160C>A', 'p.Gln54Lys', '332/1020', '160/723', '54/240', '', ''], ['A', 'missense_variant', 'MODERATE', 'C29F9.6', 'WBGene00016221', 'transcript', 'C29F9.6.2', 'protein_coding', '3/5', 'c.160C>A', 'p.Gln54Lys', '307/995', '160/723', '54/240', '', ''], ['A', 'missense_variant',…
III	115824	G	['T']	{'T', 'G'}	0.0638298	1	TRUE	FALSE	FALSE	0.12015	94	0	6	88	[['T', 'missense_variant', 'MODERATE', 'C29F9.6', 'WBGene00016221', 'transcript', 'C29F9.6.1', 'protein_coding', '5/7', 'c.162G>T', 'p.Gln54His', '334/1020', '162/723', '54/240', '', ''], ['T', 'missense_variant', 'MODERATE', 'C29F9.6', 'WBGene00016221', 'transcript', 'C29F9.6.2', 'protein_coding', '3/5', 'c.162G>T', 'p.Gln54His', '309/995', '162/723', '54/240', '', ''], ['T', 'missense_variant',…
III	115850	G	['C']	{'G', 'C'}	0.0638298	1	TRUE	FALSE	FALSE	0.12015	94	0	6	88	[['C', 'missense_variant', 'MODERATE', 'C29F9.6', 'WBGene00016221', 'transcript', 'C29F9.6.1', 'protein_coding', '5/7', 'c.188G>C', 'p.Gly63Ala', '360/1020', '188/723', '63/240', '', ''], ['C', 'missense_variant', 'MODERATE', 'C29F9.6', 'WBGene00016221', 'transcript', 'C29F9.6.2', 'protein_coding', '3/5', 'c.188G>C', 'p.Gly63Ala', '335/995', '188/723', '63/240', '', ''], ['C', 'missense_variant',…
III	115863	G	['A']	{'A', 'G'}	0.0638298	1	TRUE	FALSE	TRUE	0.12015	94	0	6	88	[['A', 'synonymous_variant', 'LOW', 'C29F9.6', 'WBGene00016221', 'transcript', 'C29F9.6.1', 'protein_coding', '5/7', 'c.201G>A', 'p.Thr67Thr', '373/1020', '201/723', '67/240', '', ''], ['A', 'synonymous_variant', 'LOW', 'C29F9.6', 'WBGene00016221', 'transcript', 'C29F9.6.2', 'protein_coding', '3/5', 'c.201G>A', 'p.Thr67Thr', '348/995', '201/723', '67/240', '', ''], ['A', 'synonymous_variant', 'LO…
III	115866	T	['C']	{'T', 'C'}	0.0638298	1	TRUE	FALSE	TRUE	0.12015	94	0	6	88	[['C', 'synonymous_variant', 'LOW', 'C29F9.6', 'WBGene00016221', 'transcript', 'C29F9.6.1', 'protein_coding', '5/7', 'c.204T>C', 'p.Cys68Cys', '376/1020', '204/723', '68/240', '', ''], ['C', 'synonymous_variant', 'LOW', 'C29F9.6', 'WBGene00016221', 'transcript', 'C29F9.6.2', 'protein_coding', '3/5', 'c.204T>C', 'p.Cys68Cys', '351/995', '204/723', '68/240', '', ''], ['C', 'synonymous_variant', 'LO…
III	115896	C	['A']	{'A', 'C'}	0.0638298	1	TRUE	FALSE	FALSE	0.12015	94	0	6	88	[['A', 'splice_region_variant&intron_variant', 'LOW', 'C29F9.6', 'WBGene00016221', 'transcript', 'C29F9.6.1', 'protein_coding', '5/6', 'c.226+8C>A', '', '', '', '', '', ''], ['A', 'splice_region_variant&intron_variant', 'LOW', 'C29F9.6', 'WBGene00016221', 'transcript', 'C29F9.6.2', 'protein_coding', '3/4', 'c.226+8C>A', '', '', '', '', '', ''], ['A', 'splice_region_variant&intron_variant', 'LOW',…
III	115915	CCCCCCCCAA	['CA', 'C']	{'CA', 'CCCCCCCCAA'}	0.045977	0.925532	FALSE	TRUE	FALSE	0.0882333	87	0	4	83	[['CA', 'intron_variant', 'MODIFIER', 'C29F9.6', 'WBGene00016221', 'transcript', 'C29F9.6.1', 'protein_coding', '5/6', 'c.226+28_227-28delCCCCCCCA', '', '', '', '', '', ''], ['C', 'intron_variant', 'MODIFIER', 'C29F9.6', 'WBGene00016221', 'transcript', 'C29F9.6.1', 'protein_coding', '5/6', 'c.226+28_227-27delCCCCCCCAA', '', '', '', '', '', ''], ['CA', 'intron_variant', 'MODIFIER', 'C29F9.6', 'WBG…
III	115927	G	['A']	{'A', 'G'}	0.0638298	1	TRUE	FALSE	TRUE	0.12015	94	0	6	88	[['A', 'intron_variant', 'MODIFIER', 'C29F9.6', 'WBGene00016221', 'transcript', 'C29F9.6.1', 'protein_coding', '5/6', 'c.227-24G>A', '', '', '', '', '', ''], ['A', 'intron_variant', 'MODIFIER', 'C29F9.6', 'WBGene00016221', 'transcript', 'C29F9.6.2', 'protein_coding', '3/4', 'c.227-24G>A', '', '', '', '', '', ''], ['A', 'intron_variant', 'MODIFIER', 'C29F9.6', 'WBGene00016221', 'transcript', 'C29F…
III	115928	T	['A']	{'T', 'A'}	0.0212766	1	TRUE	FALSE	FALSE	0.0418705	94	0	2	92	[['A', 'intron_variant', 'MODIFIER', 'C29F9.6', 'WBGene00016221', 'transcript', 'C29F9.6.1', 'protein_coding', '5/6', 'c.227-23T>A', '', '', '', '', '', ''], ['A', 'intron_variant', 'MODIFIER', 'C29F9.6', 'WBGene00016221', 'transcript', 'C29F9.6.2', 'protein_coding', '3/4', 'c.227-23T>A', '', '', '', '', '', ''], ['A', 'intron_variant', 'MODIFIER', 'C29F9.6', 'WBGene00016221', 'transcript', 'C29F…
III	115945	T	['C']	{'T', 'C'}	0.0638298	1	TRUE	FALSE	TRUE	0.12015	94	0	6	88	[['C', 'splice_region_variant&intron_variant', 'LOW', 'C29F9.6', 'WBGene00016221', 'transcript', 'C29F9.6.1', 'protein_coding', '5/6', 'c.227-6T>C', '', '', '', '', '', ''], ['C', 'splice_region_variant&intron_variant', 'LOW', 'C29F9.6', 'WBGene00016221', 'transcript', 'C29F9.6.2', 'protein_coding', '3/4', 'c.227-6T>C', '', '', '', '', '', ''], ['C', 'splice_region_variant&intron_variant', 'LOW',…
III	115967	G	['A']	{'A', 'G'}	0.0638298	1	TRUE	FALSE	TRUE	0.12015	94	0	6	88	[['A', 'synonymous_variant', 'LOW', 'C29F9.6', 'WBGene00016221', 'transcript', 'C29F9.6.1', 'protein_coding', '6/7', 'c.243G>A', 'p.Ser81Ser', '415/1020', '243/723', '81/240', '', ''], ['A', 'synonymous_variant', 'LOW', 'C29F9.6', 'WBGene00016221', 'transcript', 'C29F9.6.2', 'protein_coding', '4/5', 'c.243G>A', 'p.Ser81Ser', '390/995', '243/723', '81/240', '', ''], ['A', 'synonymous_variant', 'LO…
III	115970	T	['C']	{'T', 'C'}	0.0638298	1	TRUE	FALSE	TRUE	0.12015	94	0	6	88	[['C', 'synonymous_variant', 'LOW', 'C29F9.6', 'WBGene00016221', 'transcript', 'C29F9.6.1', 'protein_coding', '6/7', 'c.246T>C', 'p.Ser82Ser', '418/1020', '246/723', '82/240', '', ''], ['C', 'synonymous_variant', 'LOW', 'C29F9.6', 'WBGene00016221', 'transcript', 'C29F9.6.2', 'protein_coding', '4/5', 'c.246T>C', 'p.Ser82Ser', '393/995', '246/723', '82/240', '', ''], ['C', 'synonymous_variant', 'LO…
III	115985	C	['T']	{'T', 'C'}	0.0638298	1	TRUE	FALSE	TRUE	0.12015	94	0	6	88	[['T', 'synonymous_variant', 'LOW', 'C29F9.6', 'WBGene00016221', 'transcript', 'C29F9.6.1', 'protein_coding', '6/7', 'c.261C>T', 'p.His87His', '433/1020', '261/723', '87/240', '', ''], ['T', 'synonymous_variant', 'LOW', 'C29F9.6', 'WBGene00016221', 'transcript', 'C29F9.6.2', 'protein_coding', '4/5', 'c.261C>T', 'p.His87His', '408/995', '261/723', '87/240', '', ''], ['T', 'synonymous_variant', 'LO…
III	116000	T	['C']	{'T', 'C'}	0.117021	1	TRUE	FALSE	TRUE	0.20776	94	0	11	83	[['C', 'synonymous_variant', 'LOW', 'C29F9.6', 'WBGene00016221', 'transcript', 'C29F9.6.1', 'protein_coding', '6/7', 'c.276T>C', 'p.Cys92Cys', '448/1020', '276/723', '92/240', '', ''], ['C', 'synonymous_variant', 'LOW', 'C29F9.6', 'WBGene00016221', 'transcript', 'C29F9.6.2', 'protein_coding', '4/5', 'c.276T>C', 'p.Cys92Cys', '423/995', '276/723', '92/240', '', ''], ['C', 'synonymous_variant', 'LO…
III	116015	C	['T']	{'T', 'C'}	0.0638298	1	TRUE	FALSE	TRUE	0.12015	94	0	6	88	[['T', 'synonymous_variant', 'LOW', 'C29F9.6', 'WBGene00016221', 'transcript', 'C29F9.6.1', 'protein_coding', '6/7', 'c.291C>T', 'p.Cys97Cys', '463/1020', '291/723', '97/240', '', ''], ['T', 'synonymous_variant', 'LOW', 'C29F9.6', 'WBGene00016221', 'transcript', 'C29F9.6.2', 'protein_coding', '4/5', 'c.291C>T', 'p.Cys97Cys', '438/995', '291/723', '97/240', '', ''], ['T', 'synonymous_variant', 'LO…
III	116024	T	['C']	{'T', 'C'}	0.0638298	1	TRUE	FALSE	TRUE	0.12015	94	0	6	88	[['C', 'synonymous_variant', 'LOW', 'C29F9.6', 'WBGene00016221', 'transcript', 'C29F9.6.1', 'protein_coding', '6/7', 'c.300T>C', 'p.Cys100Cys', '472/1020', '300/723', '100/240', '', ''], ['C', 'synonymous_variant', 'LOW', 'C29F9.6', 'WBGene00016221', 'transcript', 'C29F9.6.2', 'protein_coding', '4/5', 'c.300T>C', 'p.Cys100Cys', '447/995', '300/723', '100/240', '', ''], ['C', 'synonymous_variant',…
III	116028	G	['A']	{'A', 'G'}	0.0638298	1	TRUE	FALSE	TRUE	0.12015	94	0	6	88	[['A', 'missense_variant', 'MODERATE', 'C29F9.6', 'WBGene00016221', 'transcript', 'C29F9.6.1', 'protein_coding', '6/7', 'c.304G>A', 'p.Ala102Thr', '476/1020', '304/723', '102/240', '', ''], ['A', 'missense_variant', 'MODERATE', 'C29F9.6', 'WBGene00016221', 'transcript', 'C29F9.6.2', 'protein_coding', '4/5', 'c.304G>A', 'p.Ala102Thr', '451/995', '304/723', '102/240', '', ''], ['A', 'missense_varia…
III	116036	G	['A']	{'A', 'G'}	0.0638298	1	TRUE	FALSE	TRUE	0.12015	94	0	6	88	[['A', 'synonymous_variant', 'LOW', 'C29F9.6', 'WBGene00016221', 'transcript', 'C29F9.6.1', 'protein_coding', '6/7', 'c.312G>A', 'p.Arg104Arg', '484/1020', '312/723', '104/240', '', ''], ['A', 'synonymous_variant', 'LOW', 'C29F9.6', 'WBGene00016221', 'transcript', 'C29F9.6.2', 'protein_coding', '4/5', 'c.312G>A', 'p.Arg104Arg', '459/995', '312/723', '104/240', '', ''], ['A', 'synonymous_variant',…
III	116044	A	['T']	{'T', 'A'}	0.0531915	1	TRUE	FALSE	FALSE	0.101263	94	0	5	89	[['T', 'missense_variant', 'MODERATE', 'C29F9.6', 'WBGene00016221', 'transcript', 'C29F9.6.1', 'protein_coding', '6/7', 'c.320A>T', 'p.Gln107Leu', '492/1020', '320/723', '107/240', '', ''], ['T', 'missense_variant', 'MODERATE', 'C29F9.6', 'WBGene00016221', 'transcript', 'C29F9.6.2', 'protein_coding', '4/5', 'c.320A>T', 'p.Gln107Leu', '467/995', '320/723', '107/240', '', ''], ['T', 'missense_varia…
III	116048	T	['C']	{'T', 'C'}	0.0638298	1	TRUE	FALSE	TRUE	0.12015	94	0	6	88	[['C', 'synonymous_variant', 'LOW', 'C29F9.6', 'WBGene00016221', 'transcript', 'C29F9.6.1', 'protein_coding', '6/7', 'c.324T>C', 'p.Asn108Asn', '496/1020', '324/723', '108/240', '', ''], ['C', 'synonymous_variant', 'LOW', 'C29F9.6', 'WBGene00016221', 'transcript', 'C29F9.6.2', 'protein_coding', '4/5', 'c.324T>C', 'p.Asn108Asn', '471/995', '324/723', '108/240', '', ''], ['C', 'synonymous_variant',…
III	116049	A	['T']	{'T', 'A'}	0.0638298	1	TRUE	FALSE	FALSE	0.12015	94	0	6	88	[['T', 'missense_variant', 'MODERATE', 'C29F9.6', 'WBGene00016221', 'transcript', 'C29F9.6.1', 'protein_coding', '6/7', 'c.325A>T', 'p.Met109Leu', '497/1020', '325/723', '109/240', '', ''], ['T', 'missense_variant', 'MODERATE', 'C29F9.6', 'WBGene00016221', 'transcript', 'C29F9.6.2', 'protein_coding', '4/5', 'c.325A>T', 'p.Met109Leu', '472/995', '325/723', '109/240', '', ''], ['T', 'missense_varia…
III	116051	G	['A']	{'A', 'G'}	0.0638298	1	TRUE	FALSE	TRUE	0.12015	94	0	6	88	[['A', 'missense_variant', 'MODERATE', 'C29F9.6', 'WBGene00016221', 'transcript', 'C29F9.6.1', 'protein_coding', '6/7', 'c.327G>A', 'p.Met109Ile', '499/1020', '327/723', '109/240', '', ''], ['A', 'missense_variant', 'MODERATE', 'C29F9.6', 'WBGene00016221', 'transcript', 'C29F9.6.2', 'protein_coding', '4/5', 'c.327G>A', 'p.Met109Ile', '474/995', '327/723', '109/240', '', ''], ['A', 'missense_varia…
III	116055	G	['A']	{'A', 'G'}	0.0212766	1	TRUE	FALSE	TRUE	0.0418705	94	0	2	92	[['A', 'missense_variant', 'MODERATE', 'C29F9.6', 'WBGene00016221', 'transcript', 'C29F9.6.1', 'protein_coding', '6/7', 'c.331G>A', 'p.Ala111Thr', '503/1020', '331/723', '111/240', '', ''], ['A', 'missense_variant', 'MODERATE', 'C29F9.6', 'WBGene00016221', 'transcript', 'C29F9.6.2', 'protein_coding', '4/5', 'c.331G>A', 'p.Ala111Thr', '478/995', '331/723', '111/240', '', ''], ['A', 'missense_varia…
III	116069	T	['C']	{'T', 'C'}	0.0638298	1	TRUE	FALSE	TRUE	0.12015	94	0	6	88	[['C', 'synonymous_variant', 'LOW', 'C29F9.6', 'WBGene00016221', 'transcript', 'C29F9.6.1', 'protein_coding', '6/7', 'c.345T>C', 'p.Ile115Ile', '517/1020', '345/723', '115/240', '', ''], ['C', 'synonymous_variant', 'LOW', 'C29F9.6', 'WBGene00016221', 'transcript', 'C29F9.6.2', 'protein_coding', '4/5', 'c.345T>C', 'p.Ile115Ile', '492/995', '345/723', '115/240', '', ''], ['C', 'synonymous_variant',…
III	116072	T	['A']	{'T', 'A'}	0.0531915	1	TRUE	FALSE	FALSE	0.101263	94	0	5	89	[['A', 'synonymous_variant', 'LOW', 'C29F9.6', 'WBGene00016221', 'transcript', 'C29F9.6.1', 'protein_coding', '6/7', 'c.348T>A', 'p.Pro116Pro', '520/1020', '348/723', '116/240', '', ''], ['A', 'synonymous_variant', 'LOW', 'C29F9.6', 'WBGene00016221', 'transcript', 'C29F9.6.2', 'protein_coding', '4/5', 'c.348T>A', 'p.Pro116Pro', '495/995', '348/723', '116/240', '', ''], ['A', 'synonymous_variant',…
III	116103	G	['A']	{'A', 'G'}	0.0638298	1	TRUE	FALSE	TRUE	0.12015	94	0	6	88	[['A', 'missense_variant', 'MODERATE', 'C29F9.6', 'WBGene00016221', 'transcript', 'C29F9.6.1', 'protein_coding', '6/7', 'c.379G>A', 'p.Gly127Arg', '551/1020', '379/723', '127/240', '', ''], ['A', 'missense_variant', 'MODERATE', 'C29F9.6', 'WBGene00016221', 'transcript', 'C29F9.6.2', 'protein_coding', '4/5', 'c.379G>A', 'p.Gly127Arg', '526/995', '379/723', '127/240', '', ''], ['A', 'missense_varia…
III	116117	G	['T']	{'T', 'G'}	0.0638298	1	TRUE	FALSE	FALSE	0.12015	94	0	6	88	[['T', 'synonymous_variant', 'LOW', 'C29F9.6', 'WBGene00016221', 'transcript', 'C29F9.6.1', 'protein_coding', '6/7', 'c.393G>T', 'p.Pro131Pro', '565/1020', '393/723', '131/240', '', ''], ['T', 'synonymous_variant', 'LOW', 'C29F9.6', 'WBGene00016221', 'transcript', 'C29F9.6.2', 'protein_coding', '4/5', 'c.393G>T', 'p.Pro131Pro', '540/995', '393/723', '131/240', '', ''], ['T', 'synonymous_variant',…
III	116132	T	['C']	{'T', 'C'}	0.0638298	1	TRUE	FALSE	TRUE	0.12015	94	0	6	88	[['C', 'synonymous_variant', 'LOW', 'C29F9.6', 'WBGene00016221', 'transcript', 'C29F9.6.1', 'protein_coding', '6/7', 'c.408T>C', 'p.Val136Val', '580/1020', '408/723', '136/240', '', ''], ['C', 'synonymous_variant', 'LOW', 'C29F9.6', 'WBGene00016221', 'transcript', 'C29F9.6.2', 'protein_coding', '4/5', 'c.408T>C', 'p.Val136Val', '555/995', '408/723', '136/240', '', ''], ['C', 'synonymous_variant',…
III	116134	C	['A']	{'A', 'C'}	0.0638298	1	TRUE	FALSE	FALSE	0.12015	94	0	6	88	[['A', 'missense_variant', 'MODERATE', 'C29F9.6', 'WBGene00016221', 'transcript', 'C29F9.6.1', 'protein_coding', '6/7', 'c.410C>A', 'p.Pro137Gln', '582/1020', '410/723', '137/240', '', ''], ['A', 'missense_variant', 'MODERATE', 'C29F9.6', 'WBGene00016221', 'transcript', 'C29F9.6.2', 'protein_coding', '4/5', 'c.410C>A', 'p.Pro137Gln', '557/995', '410/723', '137/240', '', ''], ['A', 'missense_varia…
III	116150	G	['C']	{'G', 'C'}	0.0319149	1	TRUE	FALSE	FALSE	0.0621231	94	0	3	91	[['C', 'missense_variant', 'MODERATE', 'C29F9.6', 'WBGene00016221', 'transcript', 'C29F9.6.1', 'protein_coding', '6/7', 'c.426G>C', 'p.Glu142Asp', '598/1020', '426/723', '142/240', '', ''], ['C', 'missense_variant', 'MODERATE', 'C29F9.6', 'WBGene00016221', 'transcript', 'C29F9.6.2', 'protein_coding', '4/5', 'c.426G>C', 'p.Glu142Asp', '573/995', '426/723', '142/240', '', ''], ['C', 'missense_varia…
III	116153	A	['T']	{'T', 'A'}	0.0638298	1	TRUE	FALSE	FALSE	0.12015	94	0	6	88	[['T', 'synonymous_variant', 'LOW', 'C29F9.6', 'WBGene00016221', 'transcript', 'C29F9.6.1', 'protein_coding', '6/7', 'c.429A>T', 'p.Ala143Ala', '601/1020', '429/723', '143/240', '', ''], ['T', 'synonymous_variant', 'LOW', 'C29F9.6', 'WBGene00016221', 'transcript', 'C29F9.6.2', 'protein_coding', '4/5', 'c.429A>T', 'p.Ala143Ala', '576/995', '429/723', '143/240', '', ''], ['T', 'synonymous_variant',…
III	116156	T	['G']	{'T', 'G'}	0.0638298	1	TRUE	FALSE	FALSE	0.12015	94	0	6	88	[['G', 'synonymous_variant', 'LOW', 'C29F9.6', 'WBGene00016221', 'transcript', 'C29F9.6.1', 'protein_coding', '6/7', 'c.432T>G', 'p.Val144Val', '604/1020', '432/723', '144/240', '', ''], ['G', 'synonymous_variant', 'LOW', 'C29F9.6', 'WBGene00016221', 'transcript', 'C29F9.6.2', 'protein_coding', '4/5', 'c.432T>G', 'p.Val144Val', '579/995', '432/723', '144/240', '', ''], ['G', 'synonymous_variant',…
III	116159	T	['C']	{'T', 'C'}	0.0638298	1	TRUE	FALSE	TRUE	0.12015	94	0	6	88	[['C', 'synonymous_variant', 'LOW', 'C29F9.6', 'WBGene00016221', 'transcript', 'C29F9.6.1', 'protein_coding', '6/7', 'c.435T>C', 'p.Ile145Ile', '607/1020', '435/723', '145/240', '', ''], ['C', 'synonymous_variant', 'LOW', 'C29F9.6', 'WBGene00016221', 'transcript', 'C29F9.6.2', 'protein_coding', '4/5', 'c.435T>C', 'p.Ile145Ile', '582/995', '435/723', '145/240', '', ''], ['C', 'synonymous_variant',…
III	116163	A	['C']	{'A', 'C'}	0.0638298	1	TRUE	FALSE	FALSE	0.12015	94	0	6	88	[['C', 'synonymous_variant', 'LOW', 'C29F9.6', 'WBGene00016221', 'transcript', 'C29F9.6.1', 'protein_coding', '6/7', 'c.439A>C', 'p.Arg147Arg', '611/1020', '439/723', '147/240', '', ''], ['C', 'synonymous_variant', 'LOW', 'C29F9.6', 'WBGene00016221', 'transcript', 'C29F9.6.2', 'protein_coding', '4/5', 'c.439A>C', 'p.Arg147Arg', '586/995', '439/723', '147/240', '', ''], ['C', 'synonymous_variant',…
III	116184	C	['T']	{'T', 'C'}	0.0638298	1	TRUE	FALSE	TRUE	0.12015	94	0	6	88	[['T', 'missense_variant', 'MODERATE', 'C29F9.6', 'WBGene00016221', 'transcript', 'C29F9.6.1', 'protein_coding', '6/7', 'c.460C>T', 'p.Leu154Phe', '632/1020', '460/723', '154/240', '', ''], ['T', 'missense_variant', 'MODERATE', 'C29F9.6', 'WBGene00016221', 'transcript', 'C29F9.6.2', 'protein_coding', '4/5', 'c.460C>T', 'p.Leu154Phe', '607/995', '460/723', '154/240', '', ''], ['T', 'missense_varia…
III	116187	C	['A']	{'A', 'C'}	0.0638298	1	TRUE	FALSE	FALSE	0.12015	94	0	6	88	[['A', 'missense_variant', 'MODERATE', 'C29F9.6', 'WBGene00016221', 'transcript', 'C29F9.6.1', 'protein_coding', '6/7', 'c.463C>A', 'p.His155Asn', '635/1020', '463/723', '155/240', '', ''], ['A', 'missense_variant', 'MODERATE', 'C29F9.6', 'WBGene00016221', 'transcript', 'C29F9.6.2', 'protein_coding', '4/5', 'c.463C>A', 'p.His155Asn', '610/995', '463/723', '155/240', '', ''], ['A', 'missense_varia…
III	116194	A	['G']	{'A', 'G'}	0.0638298	1	TRUE	FALSE	TRUE	0.12015	94	0	6	88	[['G', 'missense_variant', 'MODERATE', 'C29F9.6', 'WBGene00016221', 'transcript', 'C29F9.6.1', 'protein_coding', '6/7', 'c.470A>G', 'p.Gln157Arg', '642/1020', '470/723', '157/240', '', ''], ['G', 'missense_variant', 'MODERATE', 'C29F9.6', 'WBGene00016221', 'transcript', 'C29F9.6.2', 'protein_coding', '4/5', 'c.470A>G', 'p.Gln157Arg', '617/995', '470/723', '157/240', '', ''], ['G', 'missense_varia…
III	116221	A	['T']	{'T', 'A'}	0.0531915	1	TRUE	FALSE	FALSE	0.101263	94	0	5	89	[['T', 'missense_variant', 'MODERATE', 'C29F9.6', 'WBGene00016221', 'transcript', 'C29F9.6.1', 'protein_coding', '6/7', 'c.497A>T', 'p.Lys166Met', '669/1020', '497/723', '166/240', '', ''], ['T', 'missense_variant', 'MODERATE', 'C29F9.6', 'WBGene00016221', 'transcript', 'C29F9.6.2', 'protein_coding', '4/5', 'c.497A>T', 'p.Lys166Met', '644/995', '497/723', '166/240', '', ''], ['T', 'missense_varia…
III	116231	G	['C']	{'G', 'C'}	0.0638298	1	TRUE	FALSE	FALSE	0.12015	94	0	6	88	[['C', 'synonymous_variant', 'LOW', 'C29F9.6', 'WBGene00016221', 'transcript', 'C29F9.6.1', 'protein_coding', '6/7', 'c.507G>C', 'p.Ala169Ala', '679/1020', '507/723', '169/240', '', ''], ['C', 'synonymous_variant', 'LOW', 'C29F9.6', 'WBGene00016221', 'transcript', 'C29F9.6.2', 'protein_coding', '4/5', 'c.507G>C', 'p.Ala169Ala', '654/995', '507/723', '169/240', '', ''], ['C', 'synonymous_variant',…
III	116270	T	['C']	{'T', 'C'}	0.117021	1	TRUE	FALSE	TRUE	0.20776	94	0	11	83	[['C', 'synonymous_variant', 'LOW', 'C29F9.6', 'WBGene00016221', 'transcript', 'C29F9.6.1', 'protein_coding', '6/7', 'c.546T>C', 'p.Ser182Ser', '718/1020', '546/723', '182/240', '', ''], ['C', 'synonymous_variant', 'LOW', 'C29F9.6', 'WBGene00016221', 'transcript', 'C29F9.6.2', 'protein_coding', '4/5', 'c.546T>C', 'p.Ser182Ser', '693/995', '546/723', '182/240', '', ''], ['C', 'synonymous_variant',…
III	116300	G	['A']	{'A', 'G'}	0.117021	1	TRUE	FALSE	TRUE	0.20776	94	0	11	83	[['A', 'synonymous_variant', 'LOW', 'C29F9.6', 'WBGene00016221', 'transcript', 'C29F9.6.1', 'protein_coding', '6/7', 'c.576G>A', 'p.Glu192Glu', '748/1020', '576/723', '192/240', '', ''], ['A', 'synonymous_variant', 'LOW', 'C29F9.6', 'WBGene00016221', 'transcript', 'C29F9.6.2', 'protein_coding', '4/5', 'c.576G>A', 'p.Glu192Glu', '723/995', '576/723', '192/240', '', ''], ['A', 'synonymous_variant',…
III	116310	C	['A']	{'A', 'C'}	0.0638298	1	TRUE	FALSE	FALSE	0.12015	94	0	6	88	[['A', 'missense_variant', 'MODERATE', 'C29F9.6', 'WBGene00016221', 'transcript', 'C29F9.6.1', 'protein_coding', '6/7', 'c.586C>A', 'p.Arg196Ser', '758/1020', '586/723', '196/240', '', ''], ['A', 'missense_variant', 'MODERATE', 'C29F9.6', 'WBGene00016221', 'transcript', 'C29F9.6.2', 'protein_coding', '4/5', 'c.586C>A', 'p.Arg196Ser', '733/995', '586/723', '196/240', '', ''], ['A', 'missense_varia…
III	116312	C	['A']	{'A', 'C'}	0.0638298	1	TRUE	FALSE	FALSE	0.12015	94	0	6	88	[['A', 'synonymous_variant', 'LOW', 'C29F9.6', 'WBGene00016221', 'transcript', 'C29F9.6.1', 'protein_coding', '6/7', 'c.588C>A', 'p.Arg196Arg', '760/1020', '588/723', '196/240', '', ''], ['A', 'synonymous_variant', 'LOW', 'C29F9.6', 'WBGene00016221', 'transcript', 'C29F9.6.2', 'protein_coding', '4/5', 'c.588C>A', 'p.Arg196Arg', '735/995', '588/723', '196/240', '', ''], ['A', 'synonymous_variant',…
III	116319	G	['A']	{'A', 'G'}	0.0638298	1	TRUE	FALSE	TRUE	0.12015	94	0	6	88	[['A', 'missense_variant', 'MODERATE', 'C29F9.6', 'WBGene00016221', 'transcript', 'C29F9.6.1', 'protein_coding', '6/7', 'c.595G>A', 'p.Asp199Asn', '767/1020', '595/723', '199/240', '', ''], ['A', 'missense_variant', 'MODERATE', 'C29F9.6', 'WBGene00016221', 'transcript', 'C29F9.6.2', 'protein_coding', '4/5', 'c.595G>A', 'p.Asp199Asn', '742/995', '595/723', '199/240', '', ''], ['A', 'missense_varia…
III	116321	C	['A']	{'A', 'C'}	0.0638298	1	TRUE	FALSE	FALSE	0.12015	94	0	6	88	[['A', 'missense_variant', 'MODERATE', 'C29F9.6', 'WBGene00016221', 'transcript', 'C29F9.6.1', 'protein_coding', '6/7', 'c.597C>A', 'p.Asp199Glu', '769/1020', '597/723', '199/240', '', ''], ['A', 'missense_variant', 'MODERATE', 'C29F9.6', 'WBGene00016221', 'transcript', 'C29F9.6.2', 'protein_coding', '4/5', 'c.597C>A', 'p.Asp199Glu', '744/995', '597/723', '199/240', '', ''], ['A', 'missense_varia…
III	116332	A	['C']	{'A', 'C'}	0.117021	1	TRUE	FALSE	FALSE	0.20776	94	0	11	83	[['C', 'missense_variant', 'MODERATE', 'C29F9.6', 'WBGene00016221', 'transcript', 'C29F9.6.1', 'protein_coding', '6/7', 'c.608A>C', 'p.Glu203Ala', '780/1020', '608/723', '203/240', '', ''], ['C', 'missense_variant', 'MODERATE', 'C29F9.6', 'WBGene00016221', 'transcript', 'C29F9.6.2', 'protein_coding', '4/5', 'c.608A>C', 'p.Glu203Ala', '755/995', '608/723', '203/240', '', ''], ['C', 'missense_varia…
III	116370	G	['A']	{'A', 'G'}	0.0659341	0.968085	TRUE	FALSE	TRUE	0.123854	91	0	6	85	[['A', 'missense_variant', 'MODERATE', 'C29F9.6', 'WBGene00016221', 'transcript', 'C29F9.6.1', 'protein_coding', '6/7', 'c.646G>A', 'p.Ala216Thr', '818/1020', '646/723', '216/240', '', ''], ['A', 'missense_variant', 'MODERATE', 'C29F9.6', 'WBGene00016221', 'transcript', 'C29F9.6.2', 'protein_coding', '4/5', 'c.646G>A', 'p.Ala216Thr', '793/995', '646/723', '216/240', '', ''], ['A', 'missense_varia…
III	116382	C	['T']	{'T', 'C'}	0.117021	1	TRUE	FALSE	TRUE	0.20776	94	0	11	83	[['T', 'splice_region_variant&intron_variant', 'LOW', 'C29F9.6', 'WBGene00016221', 'transcript', 'C29F9.6.1', 'protein_coding', '6/6', 'c.652+6C>T', '', '', '', '', '', ''], ['T', 'splice_region_variant&intron_variant', 'LOW', 'C29F9.6', 'WBGene00016221', 'transcript', 'C29F9.6.2', 'protein_coding', '4/4', 'c.652+6C>T', '', '', '', '', '', ''], ['T', 'splice_region_variant&intron_variant', 'LOW',…
III	116393	G	['A']	{'A', 'G'}	0.117021	1	TRUE	FALSE	TRUE	0.20776	94	0	11	83	[['A', 'intron_variant', 'MODIFIER', 'C29F9.6', 'WBGene00016221', 'transcript', 'C29F9.6.1', 'protein_coding', '6/6', 'c.652+17G>A', '', '', '', '', '', ''], ['A', 'intron_variant', 'MODIFIER', 'C29F9.6', 'WBGene00016221', 'transcript', 'C29F9.6.2', 'protein_coding', '4/4', 'c.652+17G>A', '', '', '', '', '', ''], ['A', 'intron_variant', 'MODIFIER', 'C29F9.6', 'WBGene00016221', 'transcript', 'C29F…
III	116409	A	['T']	{'T', 'A'}	0.0638298	1	TRUE	FALSE	FALSE	0.12015	94	0	6	88	[['T', 'intron_variant', 'MODIFIER', 'C29F9.6', 'WBGene00016221', 'transcript', 'C29F9.6.1', 'protein_coding', '6/6', 'c.653-15A>T', '', '', '', '', '', ''], ['T', 'intron_variant', 'MODIFIER', 'C29F9.6', 'WBGene00016221', 'transcript', 'C29F9.6.2', 'protein_coding', '4/4', 'c.653-15A>T', '', '', '', '', '', ''], ['T', 'intron_variant', 'MODIFIER', 'C29F9.6', 'WBGene00016221', 'transcript', 'C29F…
III	116412	G	['A']	{'A', 'G'}	0.0638298	1	TRUE	FALSE	TRUE	0.12015	94	0	6	88	[['A', 'intron_variant', 'MODIFIER', 'C29F9.6', 'WBGene00016221', 'transcript', 'C29F9.6.1', 'protein_coding', '6/6', 'c.653-12G>A', '', '', '', '', '', ''], ['A', 'intron_variant', 'MODIFIER', 'C29F9.6', 'WBGene00016221', 'transcript', 'C29F9.6.2', 'protein_coding', '4/4', 'c.653-12G>A', '', '', '', '', '', ''], ['A', 'intron_variant', 'MODIFIER', 'C29F9.6', 'WBGene00016221', 'transcript', 'C29F…
III	116415	G	['A']	{'A', 'G'}	0.0531915	1	TRUE	FALSE	TRUE	0.101263	94	0	5	89	[['A', 'intron_variant', 'MODIFIER', 'C29F9.6', 'WBGene00016221', 'transcript', 'C29F9.6.1', 'protein_coding', '6/6', 'c.653-9G>A', '', '', '', '', '', ''], ['A', 'intron_variant', 'MODIFIER', 'C29F9.6', 'WBGene00016221', 'transcript', 'C29F9.6.2', 'protein_coding', '4/4', 'c.653-9G>A', '', '', '', '', '', ''], ['A', 'intron_variant', 'MODIFIER', 'C29F9.6', 'WBGene00016221', 'transcript', 'C29F9.…
III	116416	A	['G']	{'A', 'G'}	0.117021	1	TRUE	FALSE	TRUE	0.20776	94	0	11	83	[['G', 'splice_region_variant&intron_variant', 'LOW', 'C29F9.6', 'WBGene00016221', 'transcript', 'C29F9.6.1', 'protein_coding', '6/6', 'c.653-8A>G', '', '', '', '', '', ''], ['G', 'splice_region_variant&intron_variant', 'LOW', 'C29F9.6', 'WBGene00016221', 'transcript', 'C29F9.6.2', 'protein_coding', '4/4', 'c.653-8A>G', '', '', '', '', '', ''], ['G', 'splice_region_variant&intron_variant', 'LOW',…
III	116418	T	['A']	{'T', 'A'}	0.0531915	1	TRUE	FALSE	FALSE	0.101263	94	0	5	89	[['A', 'splice_region_variant&intron_variant', 'LOW', 'C29F9.6', 'WBGene00016221', 'transcript', 'C29F9.6.1', 'protein_coding', '6/6', 'c.653-6T>A', '', '', '', '', '', ''], ['A', 'splice_region_variant&intron_variant', 'LOW', 'C29F9.6', 'WBGene00016221', 'transcript', 'C29F9.6.2', 'protein_coding', '4/4', 'c.653-6T>A', '', '', '', '', '', ''], ['A', 'splice_region_variant&intron_variant', 'LOW',…
III	116425	G	['A']	{'A', 'G'}	0.117021	1	TRUE	FALSE	TRUE	0.20776	94	0	11	83	[['A', 'splice_region_variant&synonymous_variant', 'LOW', 'C29F9.6', 'WBGene00016221', 'transcript', 'C29F9.6.1', 'protein_coding', '7/7', 'c.654G>A', 'p.Glu218Glu', '826/1020', '654/723', '218/240', '', ''], ['A', 'splice_region_variant&synonymous_variant', 'LOW', 'C29F9.6', 'WBGene00016221', 'transcript', 'C29F9.6.2', 'protein_coding', '5/5', 'c.654G>A', 'p.Glu218Glu', '801/995', '654/723', '21…
III	116431	T	['C']	{'T', 'C'}	0.0638298	1	TRUE	FALSE	TRUE	0.12015	94	0	6	88	[['C', 'synonymous_variant', 'LOW', 'C29F9.6', 'WBGene00016221', 'transcript', 'C29F9.6.1', 'protein_coding', '7/7', 'c.660T>C', 'p.Asp220Asp', '832/1020', '660/723', '220/240', '', ''], ['C', 'synonymous_variant', 'LOW', 'C29F9.6', 'WBGene00016221', 'transcript', 'C29F9.6.2', 'protein_coding', '5/5', 'c.660T>C', 'p.Asp220Asp', '807/995', '660/723', '220/240', '', ''], ['C', 'synonymous_variant',…
III	116432	C	['T']	{'T', 'C'}	0.0531915	1	TRUE	FALSE	TRUE	0.101263	94	0	5	89	[['T', 'missense_variant', 'MODERATE', 'C29F9.6', 'WBGene00016221', 'transcript', 'C29F9.6.1', 'protein_coding', '7/7', 'c.661C>T', 'p.Pro221Ser', '833/1020', '661/723', '221/240', '', ''], ['T', 'missense_variant', 'MODERATE', 'C29F9.6', 'WBGene00016221', 'transcript', 'C29F9.6.2', 'protein_coding', '5/5', 'c.661C>T', 'p.Pro221Ser', '808/995', '661/723', '221/240', '', ''], ['T', 'missense_varia…
III	116434	T	['G']	{'T', 'G'}	0.117021	1	TRUE	FALSE	FALSE	0.20776	94	0	11	83	[['G', 'synonymous_variant', 'LOW', 'C29F9.6', 'WBGene00016221', 'transcript', 'C29F9.6.1', 'protein_coding', '7/7', 'c.663T>G', 'p.Pro221Pro', '835/1020', '663/723', '221/240', '', ''], ['G', 'synonymous_variant', 'LOW', 'C29F9.6', 'WBGene00016221', 'transcript', 'C29F9.6.2', 'protein_coding', '5/5', 'c.663T>G', 'p.Pro221Pro', '810/995', '663/723', '221/240', '', ''], ['G', 'synonymous_variant',…
III	116439	A	['C']	{'A', 'C'}	0.117021	1	TRUE	FALSE	FALSE	0.20776	94	0	11	83	[['C', 'missense_variant', 'MODERATE', 'C29F9.6', 'WBGene00016221', 'transcript', 'C29F9.6.1', 'protein_coding', '7/7', 'c.668A>C', 'p.Glu223Ala', '840/1020', '668/723', '223/240', '', ''], ['C', 'missense_variant', 'MODERATE', 'C29F9.6', 'WBGene00016221', 'transcript', 'C29F9.6.2', 'protein_coding', '5/5', 'c.668A>C', 'p.Glu223Ala', '815/995', '668/723', '223/240', '', ''], ['C', 'missense_varia…
III	116442	T	['C']	{'T', 'C'}	0.117021	1	TRUE	FALSE	TRUE	0.20776	94	0	11	83	[['C', 'missense_variant', 'MODERATE', 'C29F9.6', 'WBGene00016221', 'transcript', 'C29F9.6.1', 'protein_coding', '7/7', 'c.671T>C', 'p.Val224Ala', '843/1020', '671/723', '224/240', '', ''], ['C', 'missense_variant', 'MODERATE', 'C29F9.6', 'WBGene00016221', 'transcript', 'C29F9.6.2', 'protein_coding', '5/5', 'c.671T>C', 'p.Val224Ala', '818/995', '671/723', '224/240', '', ''], ['C', 'missense_varia…
III	116443	G	['T']	{'T', 'G'}	0.117021	1	TRUE	FALSE	FALSE	0.20776	94	0	11	83	[['T', 'synonymous_variant', 'LOW', 'C29F9.6', 'WBGene00016221', 'transcript', 'C29F9.6.1', 'protein_coding', '7/7', 'c.672G>T', 'p.Val224Val', '844/1020', '672/723', '224/240', '', ''], ['T', 'synonymous_variant', 'LOW', 'C29F9.6', 'WBGene00016221', 'transcript', 'C29F9.6.2', 'protein_coding', '5/5', 'c.672G>T', 'p.Val224Val', '819/995', '672/723', '224/240', '', ''], ['T', 'synonymous_variant',…
III	116449	T	['C']	{'T', 'C'}	0.117021	1	TRUE	FALSE	TRUE	0.20776	94	0	11	83	[['C', 'synonymous_variant', 'LOW', 'C29F9.6', 'WBGene00016221', 'transcript', 'C29F9.6.1', 'protein_coding', '7/7', 'c.678T>C', 'p.Asp226Asp', '850/1020', '678/723', '226/240', '', ''], ['C', 'synonymous_variant', 'LOW', 'C29F9.6', 'WBGene00016221', 'transcript', 'C29F9.6.2', 'protein_coding', '5/5', 'c.678T>C', 'p.Asp226Asp', '825/995', '678/723', '226/240', '', ''], ['C', 'synonymous_variant',…
III	116464	T	['C']	{'T', 'C'}	0.117021	1	TRUE	FALSE	TRUE	0.20776	94	0	11	83	[['C', 'synonymous_variant', 'LOW', 'C29F9.6', 'WBGene00016221', 'transcript', 'C29F9.6.1', 'protein_coding', '7/7', 'c.693T>C', 'p.Thr231Thr', '865/1020', '693/723', '231/240', '', ''], ['C', 'synonymous_variant', 'LOW', 'C29F9.6', 'WBGene00016221', 'transcript', 'C29F9.6.2', 'protein_coding', '5/5', 'c.693T>C', 'p.Thr231Thr', '840/995', '693/723', '231/240', '', ''], ['C', 'synonymous_variant',…
III	116481	G	['A']	{'A', 'G'}	0.148936	1	TRUE	FALSE	TRUE	0.254864	94	0	14	80	[['A', 'missense_variant', 'MODERATE', 'C29F9.6', 'WBGene00016221', 'transcript', 'C29F9.6.1', 'protein_coding', '7/7', 'c.710G>A', 'p.Gly237Asp', '882/1020', '710/723', '237/240', '', ''], ['A', 'missense_variant', 'MODERATE', 'C29F9.6', 'WBGene00016221', 'transcript', 'C29F9.6.2', 'protein_coding', '5/5', 'c.710G>A', 'p.Gly237Asp', '857/995', '710/723', '237/240', '', ''], ['A', 'missense_varia…
III	116482	C	['T']	{'T', 'C'}	0.0531915	1	TRUE	FALSE	TRUE	0.101263	94	0	5	89	[['T', 'synonymous_variant', 'LOW', 'C29F9.6', 'WBGene00016221', 'transcript', 'C29F9.6.1', 'protein_coding', '7/7', 'c.711C>T', 'p.Gly237Gly', '883/1020', '711/723', '237/240', '', ''], ['T', 'synonymous_variant', 'LOW', 'C29F9.6', 'WBGene00016221', 'transcript', 'C29F9.6.2', 'protein_coding', '5/5', 'c.711C>T', 'p.Gly237Gly', '858/995', '711/723', '237/240', '', ''], ['T', 'synonymous_variant',…
III	116489	G	['T']	{'T', 'G'}	0.0531915	1	TRUE	FALSE	FALSE	0.101263	94	0	5	89	[['T', 'missense_variant', 'MODERATE', 'C29F9.6', 'WBGene00016221', 'transcript', 'C29F9.6.1', 'protein_coding', '7/7', 'c.718G>T', 'p.Asp240Tyr', '890/1020', '718/723', '240/240', '', ''], ['T', 'missense_variant', 'MODERATE', 'C29F9.6', 'WBGene00016221', 'transcript', 'C29F9.6.2', 'protein_coding', '5/5', 'c.718G>T', 'p.Asp240Tyr', '865/995', '718/723', '240/240', '', ''], ['T', 'missense_varia…
III	116511	A	['T']	{'T', 'A'}	0.117021	1	TRUE	FALSE	FALSE	0.20776	94	0	11	83	[['T', '3_prime_UTR_variant', 'MODIFIER', 'C29F9.6', 'WBGene00016221', 'transcript', 'C29F9.6.1', 'protein_coding', '7/7', 'c.*17A>T', '', '', '', '', '17', ''], ['T', '3_prime_UTR_variant', 'MODIFIER', 'C29F9.6', 'WBGene00016221', 'transcript', 'C29F9.6.2', 'protein_coding', '5/5', 'c.*17A>T', '', '', '', '', '17', ''], ['T', '3_prime_UTR_variant', 'MODIFIER', 'C29F9.6', 'WBGene00016221', 'trans…
III	116513	A	['G']	{'A', 'G'}	0.0531915	1	TRUE	FALSE	TRUE	0.101263	94	0	5	89	[['G', '3_prime_UTR_variant', 'MODIFIER', 'C29F9.6', 'WBGene00016221', 'transcript', 'C29F9.6.1', 'protein_coding', '7/7', 'c.*19A>G', '', '', '', '', '19', ''], ['G', '3_prime_UTR_variant', 'MODIFIER', 'C29F9.6', 'WBGene00016221', 'transcript', 'C29F9.6.2', 'protein_coding', '5/5', 'c.*19A>G', '', '', '', '', '19', ''], ['G', '3_prime_UTR_variant', 'MODIFIER', 'C29F9.6', 'WBGene00016221', 'trans…
III	116529	A	['T']	{'T', 'A'}	0.0659341	0.968085	TRUE	FALSE	FALSE	0.123854	91	0	6	85	[['T', '3_prime_UTR_variant', 'MODIFIER', 'C29F9.6', 'WBGene00016221', 'transcript', 'C29F9.6.1', 'protein_coding', '7/7', 'c.*35A>T', '', '', '', '', '35', ''], ['T', '3_prime_UTR_variant', 'MODIFIER', 'C29F9.6', 'WBGene00016221', 'transcript', 'C29F9.6.2', 'protein_coding', '5/5', 'c.*35A>T', '', '', '', '', '35', ''], ['T', '3_prime_UTR_variant', 'MODIFIER', 'C29F9.6', 'WBGene00016221', 'trans…
III	116530	C	['T']	{'T', 'C'}	0.0659341	0.968085	TRUE	FALSE	TRUE	0.123854	91	0	6	85	[['T', '3_prime_UTR_variant', 'MODIFIER', 'C29F9.6', 'WBGene00016221', 'transcript', 'C29F9.6.1', 'protein_coding', '7/7', 'c.*36C>T', '', '', '', '', '36', ''], ['T', '3_prime_UTR_variant', 'MODIFIER', 'C29F9.6', 'WBGene00016221', 'transcript', 'C29F9.6.2', 'protein_coding', '5/5', 'c.*36C>T', '', '', '', '', '36', ''], ['T', '3_prime_UTR_variant', 'MODIFIER', 'C29F9.6', 'WBGene00016221', 'trans…
III	116633	CA	['C']	{'CA', 'C'}	0.0333333	0.957447	FALSE	TRUE	FALSE	0.0648045	90	0	3	87
III	116878	T	['C']	{'T', 'C'}	0.0638298	1	TRUE	FALSE	TRUE	0.12015	94	0	6	88
III	116900	G	['A']	{'A', 'G'}	0.0645161	0.989362	TRUE	FALSE	TRUE	0.12136	93	0	6	87
III	116934	T	['C']	{'T', 'C'}	0.0322581	0.989362	TRUE	FALSE	TRUE	0.0627724	93	0	3	90
III	116950	C	['T']	{'T', 'C'}	0.0106383	1	TRUE	FALSE	TRUE	0.0211628	94	0	1	93
III	116967	A	['G']	{'A', 'G'}	0.0638298	1	TRUE	FALSE	TRUE	0.12015	94	0	6	88
III	116969	A	['G']	{'A', 'G'}	0.0638298	1	TRUE	FALSE	TRUE	0.12015	94	0	6	88
III	116983	T	['G']	{'T', 'G'}	0.0638298	1	TRUE	FALSE	FALSE	0.12015	94	0	6	88
III	117005	G	['A']	{'A', 'G'}	0.0638298	1	TRUE	FALSE	TRUE	0.12015	94	0	6	88
III	117007	T	['C']	{'T', 'C'}	0.0638298	1	TRUE	FALSE	TRUE	0.12015	94	0	6	88
III	117008	T	['C']	{'T', 'C'}	0.0638298	1	TRUE	FALSE	TRUE	0.12015	94	0	6	88
III	117033	G	['T']	{'T', 'G'}	0.0652174	0.978723	TRUE	FALSE	FALSE	0.122594	92	0	6	86
III	117043	G	['A']	{'A', 'G'}	0.0531915	1	TRUE	FALSE	TRUE	0.101263	94	0	5	89
III	117047	C	['T']	{'T', 'C'}	0.0638298	1	TRUE	FALSE	TRUE	0.12015	94	0	6	88
III	117067	C	['T']	{'T', 'C'}	0.0215054	0.989362	TRUE	FALSE	TRUE	0.0423133	93	0	2	91
III	117089	C	['T']	{'T', 'C'}	0.0537634	0.989362	TRUE	FALSE	TRUE	0.102296	93	0	5	88
III	117091	A	['C', 'G']	{'A', 'G'}	0.0537634	0.989362	TRUE	FALSE	FALSE	0.102296	93	0	5	88
III	117111	C	['A']	{'A', 'C'}	0.0638298	1	TRUE	FALSE	FALSE	0.12015	94	0	6	88
III	117113	C	['T']	{'T', 'C'}	0.0638298	1	TRUE	FALSE	TRUE	0.12015	94	0	6	88
III	117114	G	['A']	{'A', 'G'}	0.0638298	1	TRUE	FALSE	TRUE	0.12015	94	0	6	88
III	117120	C	['A']	{'A', 'C'}	0.0638298	1	TRUE	FALSE	FALSE	0.12015	94	0	6	88
III	117155	A	['G']	{'A', 'G'}	0.0645161	0.989362	TRUE	FALSE	TRUE	0.12136	93	0	6	87
III	117162	C	['T']	{'T', 'C'}	0.0212766	1	TRUE	FALSE	TRUE	0.0418705	94	0	2	92
III	117169	A	['C']	{'A', 'C'}	0.0638298	1	TRUE	FALSE	FALSE	0.12015	94	0	6	88
III	117177	T	['G']	{'T', 'G'}	0.0638298	1	TRUE	FALSE	FALSE	0.12015	94	0	6	88
III	117198	T	['G']	{'T', 'G'}	0.0212766	1	TRUE	FALSE	FALSE	0.0418705	94	0	2	92
III	117203	C	['T']	{'T', 'C'}	0.0531915	1	TRUE	FALSE	TRUE	0.101263	94	0	5	89
III	117211	C	['T']	{'T', 'C'}	0.0106383	1	TRUE	FALSE	TRUE	0.0211628	94	0	1	93
III	117225	A	['C']	{'A', 'C'}	0.0638298	1	TRUE	FALSE	FALSE	0.12015	94	0	6	88
III	117237	C	['A']	{'A', 'C'}	0.0531915	1	TRUE	FALSE	FALSE	0.101263	94	0	5	89
III	117281	C	['A']	{'A', 'C'}	0.117021	1	TRUE	FALSE	FALSE	0.20776	94	0	11	83
III	117285	G	['GT', 'GTC']	{'GT', 'G'}	0.0212766	1	FALSE	TRUE	FALSE	0.0418705	94	0	2	92
III	117286	C	['T']	{'T', 'C'}	0.0319149	1	TRUE	FALSE	TRUE	0.0621231	94	0	3	91
III	117287	CG	['C', 'CGGGG', 'CGGG']	{'CGGGG', 'CG', 'CGGG', 'C'}	0.12234	1	FALSE	TRUE	FALSE	0.215895	94	1	11	82
III	117321	C	['T']	{'T', 'C'}	0.0638298	1	TRUE	FALSE	TRUE	0.12015	94	0	6	88
III	117358	A	['G']	{'A', 'G'}	0.0638298	1	TRUE	FALSE	TRUE	0.12015	94	0	6	88
III	117362	G	['GTA']	{'G', 'GTA'}	0.0638298	1	FALSE	TRUE	FALSE	0.12015	94	0	6	88
III	117382	T	['C']	{'T', 'C'}	0.0638298	1	TRUE	FALSE	TRUE	0.12015	94	0	6	88
III	117384	G	['A']	{'A', 'G'}	0.0106383	1	TRUE	FALSE	TRUE	0.0211628	94	0	1	93
III	117407	C	['T']	{'T', 'C'}	0.0638298	1	TRUE	FALSE	TRUE	0.12015	94	0	6	88
III	117414	T	['A']	{'T', 'A'}	0.414894	1	TRUE	FALSE	FALSE	0.48811	94	0	39	55
III	117423	T	['C']	{'T', 'C'}	0.0319149	1	TRUE	FALSE	TRUE	0.0621231	94	0	3	91
III	117435	T	['G']	{'T', 'G'}	0.0638298	1	TRUE	FALSE	FALSE	0.12015	94	0	6	88
III	117444	A	['G']	{'A', 'G'}	0.0869565	0.978723	TRUE	FALSE	TRUE	0.159658	92	0	8	84
III	117445	G	['C']	{'G', 'C'}	0.0869565	0.978723	TRUE	FALSE	FALSE	0.159658	92	0	8	84
III	117446	A	['C', 'G']	{'A', 'C'}	0.0879121	0.968085	TRUE	FALSE	FALSE	0.161253	91	0	8	83
III	117449	T	['G']	{'T', 'G'}	0.0879121	0.968085	TRUE	FALSE	FALSE	0.161253	91	0	8	83
III	117451	T	['C']	{'T', 'C'}	0.0879121	0.968085	TRUE	FALSE	TRUE	0.161253	91	0	8	83
III	117452	G	['T']	{'T', 'G'}	0.0879121	0.968085	TRUE	FALSE	FALSE	0.161253	91	0	8	83
III	117455	A	['T']	{'T', 'A'}	0.117021	1	TRUE	FALSE	FALSE	0.20776	94	0	11	83
III	117459	T	['C']	{'T', 'C'}	0.0531915	1	TRUE	FALSE	TRUE	0.101263	94	0	5	89
III	117463	T	['G']	{'T', 'G'}	0.0638298	1	TRUE	FALSE	FALSE	0.12015	94	0	6	88
III	117464	C	['T']	{'T', 'C'}	0.0212766	1	TRUE	FALSE	TRUE	0.0418705	94	0	2	92
III	117494	T	['A']	{'T', 'A'}	0.0638298	1	TRUE	FALSE	FALSE	0.12015	94	0	6	88
III	117507	C	['A']	{'A', 'C'}	0.117021	1	TRUE	FALSE	FALSE	0.20776	94	0	11	83
III	117525	G	['C', 'A']	{'G', 'C'}	0.0638298	1	TRUE	FALSE	FALSE	0.12015	94	0	6	88
III	117540	T	['C']	{'T', 'C'}	0.117021	1	TRUE	FALSE	TRUE	0.20776	94	0	11	83
III	117552	A	['C']	{'A', 'C'}	0.0638298	1	TRUE	FALSE	FALSE	0.12015	94	0	6	88
III	117553	G	['A']	{'A', 'G'}	0.0638298	1	TRUE	FALSE	TRUE	0.12015	94	0	6	88
III	117599	T	['C']	{'T', 'C'}	0.0638298	1	TRUE	FALSE	TRUE	0.12015	94	0	6	88
III	117600	C	['A']	{'A', 'C'}	0.0638298	1	TRUE	FALSE	FALSE	0.12015	94	0	6	88
III	117608	T	['C']	{'T', 'C'}	0.0638298	1	TRUE	FALSE	TRUE	0.12015	94	0	6	88
III	117626	T	['C']	{'T', 'C'}	0.0561798	0.946809	TRUE	FALSE	TRUE	0.106646	89	0	5	84
III	117637	C	['T']	{'T', 'C'}	0.0638298	1	TRUE	FALSE	TRUE	0.12015	94	0	6	88
III	117646	T	['C']	{'T', 'C'}	0.0638298	1	TRUE	FALSE	TRUE	0.12015	94	0	6	88
III	117661	T	['G']	{'T', 'G'}	0.0638298	1	TRUE	FALSE	FALSE	0.12015	94	0	6	88
III	117685	A	['G']	{'A', 'G'}	0.0638298	1	TRUE	FALSE	TRUE	0.12015	94	0	6	88
III	117688	C	['A']	{'A', 'C'}	0.0638298	1	TRUE	FALSE	FALSE	0.12015	94	0	6	88
III	117691	G	['A']	{'A', 'G'}	0.0638298	1	TRUE	FALSE	TRUE	0.12015	94	0	6	88
III	117694	C	['G']	{'G', 'C'}	0.0638298	1	TRUE	FALSE	FALSE	0.12015	94	0	6	88
III	117697	A	['C']	{'A', 'C'}	0.117021	1	TRUE	FALSE	FALSE	0.20776	94	0	11	83
III	117698	A	['C']	{'A', 'C'}	0.117021	1	TRUE	FALSE	FALSE	0.20776	94	0	11	83
III	117715	G	['C']	{'G', 'C'}	0.117021	1	TRUE	FALSE	FALSE	0.20776	94	0	11	83	[['C', 'synonymous_variant', 'LOW', 'C29F9.5', 'WBGene00016220', 'transcript', 'C29F9.5', 'protein_coding', '1/4', 'c.9G>C', 'p.Thr3Thr', '9/681', '9/681', '3/226', '', '']]
III	117727	T	['C']	{'T', 'C'}	0.0638298	1	TRUE	FALSE	TRUE	0.12015	94	0	6	88	[['C', 'synonymous_variant', 'LOW', 'C29F9.5', 'WBGene00016220', 'transcript', 'C29F9.5', 'protein_coding', '1/4', 'c.21T>C', 'p.Arg7Arg', '21/681', '21/681', '7/226', '', '']]
III	117733	A	['C']	{'A', 'C'}	0.0638298	1	TRUE	FALSE	FALSE	0.12015	94	0	6	88	[['C', 'synonymous_variant', 'LOW', 'C29F9.5', 'WBGene00016220', 'transcript', 'C29F9.5', 'protein_coding', '1/4', 'c.27A>C', 'p.Leu9Leu', '27/681', '27/681', '9/226', '', '']]
III	117763	C	['T']	{'T', 'C'}	0.0638298	1	TRUE	FALSE	TRUE	0.12015	94	0	6	88	[['T', 'synonymous_variant', 'LOW', 'C29F9.5', 'WBGene00016220', 'transcript', 'C29F9.5', 'protein_coding', '1/4', 'c.57C>T', 'p.Val19Val', '57/681', '57/681', '19/226', '', '']]
III	117778	G	['A']	{'A', 'G'}	0.0319149	1	TRUE	FALSE	TRUE	0.0621231	94	0	3	91	[['A', 'splice_region_variant&intron_variant', 'LOW', 'C29F9.5', 'WBGene00016220', 'transcript', 'C29F9.5', 'protein_coding', '1/3', 'c.69+3G>A', '', '', '', '', '', '']]
III	117820	A	['G']	{'A', 'G'}	0.0638298	1	TRUE	FALSE	TRUE	0.12015	94	0	6	88	[['G', 'missense_variant&splice_region_variant', 'MODERATE', 'C29F9.5', 'WBGene00016220', 'transcript', 'C29F9.5', 'protein_coding', '2/4', 'c.71A>G', 'p.Lys24Arg', '71/681', '71/681', '24/226', '', '']]
III	117821	A	['C']	{'A', 'C'}	0.0638298	1	TRUE	FALSE	FALSE	0.12015	94	0	6	88	[['C', 'missense_variant&splice_region_variant', 'MODERATE', 'C29F9.5', 'WBGene00016220', 'transcript', 'C29F9.5', 'protein_coding', '2/4', 'c.72A>C', 'p.Lys24Asn', '72/681', '72/681', '24/226', '', '']]
III	117822	A	['G']	{'A', 'G'}	0.0319149	1	TRUE	FALSE	TRUE	0.0621231	94	0	3	91	[['G', 'missense_variant', 'MODERATE', 'C29F9.5', 'WBGene00016220', 'transcript', 'C29F9.5', 'protein_coding', '2/4', 'c.73A>G', 'p.Ile25Val', '73/681', '73/681', '25/226', '', '']]
III	117824	C	['T']	{'T', 'C'}	0.0531915	1	TRUE	FALSE	TRUE	0.101263	94	0	5	89	[['T', 'synonymous_variant', 'LOW', 'C29F9.5', 'WBGene00016220', 'transcript', 'C29F9.5', 'protein_coding', '2/4', 'c.75C>T', 'p.Ile25Ile', '75/681', '75/681', '25/226', '', '']]
III	117837	G	['A']	{'A', 'G'}	0.0106383	1	TRUE	FALSE	TRUE	0.0211628	94	0	1	93	[['A', 'missense_variant', 'MODERATE', 'C29F9.5', 'WBGene00016220', 'transcript', 'C29F9.5', 'protein_coding', '2/4', 'c.88G>A', 'p.Glu30Lys', '88/681', '88/681', '30/226', '', '']]
III	117839	G	['A']	{'A', 'G'}	0.0638298	1	TRUE	FALSE	TRUE	0.12015	94	0	6	88	[['A', 'synonymous_variant', 'LOW', 'C29F9.5', 'WBGene00016220', 'transcript', 'C29F9.5', 'protein_coding', '2/4', 'c.90G>A', 'p.Glu30Glu', '90/681', '90/681', '30/226', '', '']]
III	117869	T	['C']	{'T', 'C'}	0.0638298	1	TRUE	FALSE	TRUE	0.12015	94	0	6	88	[['C', 'synonymous_variant', 'LOW', 'C29F9.5', 'WBGene00016220', 'transcript', 'C29F9.5', 'protein_coding', '2/4', 'c.120T>C', 'p.Cys40Cys', '120/681', '120/681', '40/226', '', '']]
III	117920	G	['A']	{'A', 'G'}	0.0638298	1	TRUE	FALSE	TRUE	0.12015	94	0	6	88	[['A', 'synonymous_variant', 'LOW', 'C29F9.5', 'WBGene00016220', 'transcript', 'C29F9.5', 'protein_coding', '2/4', 'c.171G>A', 'p.Ser57Ser', '171/681', '171/681', '57/226', '', '']]
III	117923	C	['T']	{'T', 'C'}	0.0638298	1	TRUE	FALSE	TRUE	0.12015	94	0	6	88	[['T', 'synonymous_variant', 'LOW', 'C29F9.5', 'WBGene00016220', 'transcript', 'C29F9.5', 'protein_coding', '2/4', 'c.174C>T', 'p.Cys58Cys', '174/681', '174/681', '58/226', '', '']]
III	117967	A	['G']	{'A', 'G'}	0.0568182	0.93617	TRUE	FALSE	TRUE	0.107792	88	0	5	83	[['G', 'intron_variant', 'MODIFIER', 'C29F9.5', 'WBGene00016220', 'transcript', 'C29F9.5', 'protein_coding', '2/3', 'c.196+22A>G', '', '', '', '', '', '']]
III	117969	T	['C']	{'T', 'C'}	0.0568182	0.93617	TRUE	FALSE	TRUE	0.107792	88	0	5	83	[['C', 'intron_variant', 'MODIFIER', 'C29F9.5', 'WBGene00016220', 'transcript', 'C29F9.5', 'protein_coding', '2/3', 'c.196+24T>C', '', '', '', '', '', '']]
III	117972	T	['C']	{'T', 'C'}	0.0568182	0.93617	TRUE	FALSE	TRUE	0.107792	88	0	5	83	[['C', 'intron_variant', 'MODIFIER', 'C29F9.5', 'WBGene00016220', 'transcript', 'C29F9.5', 'protein_coding', '2/3', 'c.196+27T>C', '', '', '', '', '', '']]
III	117977	G	['A']	{'A', 'G'}	0.0568182	0.93617	TRUE	FALSE	TRUE	0.107792	88	0	5	83	[['A', 'intron_variant', 'MODIFIER', 'C29F9.5', 'WBGene00016220', 'transcript', 'C29F9.5', 'protein_coding', '2/3', 'c.196+32G>A', '', '', '', '', '', '']]
III	118026	A	['G']	{'A', 'G'}	0.0568182	0.93617	TRUE	FALSE	TRUE	0.107792	88	0	5	83	[['G', 'intron_variant', 'MODIFIER', 'C29F9.5', 'WBGene00016220', 'transcript', 'C29F9.5', 'protein_coding', '2/3', 'c.196+81A>G', '', '', '', '', '', '']]
III	118049	C	['T']	{'T', 'C'}	0.0568182	0.93617	TRUE	FALSE	TRUE	0.107792	88	0	5	83	[['T', 'intron_variant', 'MODIFIER', 'C29F9.5', 'WBGene00016220', 'transcript', 'C29F9.5', 'protein_coding', '2/3', 'c.196+104C>T', '', '', '', '', '', '']]
III	118050	C	['T']	{'T', 'C'}	0.0568182	0.93617	TRUE	FALSE	TRUE	0.107792	88	0	5	83	[['T', 'intron_variant', 'MODIFIER', 'C29F9.5', 'WBGene00016220', 'transcript', 'C29F9.5', 'protein_coding', '2/3', 'c.196+105C>T', '', '', '', '', '', '']]
III	118079	T	['C']	{'T', 'C'}	0.0555556	0.957447	TRUE	FALSE	TRUE	0.105525	90	0	5	85	[['C', 'intron_variant', 'MODIFIER', 'C29F9.5', 'WBGene00016220', 'transcript', 'C29F9.5', 'protein_coding', '2/3', 'c.196+134T>C', '', '', '', '', '', '']]
III	118113	G	['A']	{'A', 'G'}	0.0561798	0.946809	TRUE	FALSE	TRUE	0.106646	89	0	5	84	[['A', 'intron_variant', 'MODIFIER', 'C29F9.5', 'WBGene00016220', 'transcript', 'C29F9.5', 'protein_coding', '2/3', 'c.197-116G>A', '', '', '', '', '', '']]
III	118114	G	['A']	{'A', 'G'}	0.0531915	1	TRUE	FALSE	TRUE	0.101263	94	0	5	89	[['A', 'intron_variant', 'MODIFIER', 'C29F9.5', 'WBGene00016220', 'transcript', 'C29F9.5', 'protein_coding', '2/3', 'c.197-115G>A', '', '', '', '', '', '']]
III	118127	T	['C']	{'T', 'C'}	0.0212766	1	TRUE	FALSE	TRUE	0.0418705	94	0	2	92	[['C', 'intron_variant', 'MODIFIER', 'C29F9.5', 'WBGene00016220', 'transcript', 'C29F9.5', 'protein_coding', '2/3', 'c.197-102T>C', '', '', '', '', '', '']]
III	118152	C	['A']	{'A', 'C'}	0.037234	1	TRUE	FALSE	FALSE	0.0720787	94	3	2	89	[['A', 'intron_variant', 'MODIFIER', 'C29F9.5', 'WBGene00016220', 'transcript', 'C29F9.5', 'protein_coding', '2/3', 'c.197-77C>A', '', '', '', '', '', '']]
III	118155	G	['A']	{'A', 'G'}	0.0531915	1	TRUE	FALSE	TRUE	0.101263	94	0	5	89	[['A', 'intron_variant', 'MODIFIER', 'C29F9.5', 'WBGene00016220', 'transcript', 'C29F9.5', 'protein_coding', '2/3', 'c.197-74G>A', '', '', '', '', '', '']]
III	118167	A	['G']	{'A', 'G'}	0.037234	1	TRUE	FALSE	TRUE	0.0720787	94	3	2	89	[['G', 'intron_variant', 'MODIFIER', 'C29F9.5', 'WBGene00016220', 'transcript', 'C29F9.5', 'protein_coding', '2/3', 'c.197-62A>G', '', '', '', '', '', '']]
III	118230	G	['T']	{'T', 'G'}	0.0638298	1	TRUE	FALSE	FALSE	0.12015	94	0	6	88	[['T', 'splice_region_variant&synonymous_variant', 'LOW', 'C29F9.5', 'WBGene00016220', 'transcript', 'C29F9.5', 'protein_coding', '3/4', 'c.198G>T', 'p.Ser66Ser', '198/681', '198/681', '66/226', '', '']]
III	118242	T	['A']	{'T', 'A'}	0.0638298	1	TRUE	FALSE	FALSE	0.12015	94	0	6	88	[['A', 'synonymous_variant', 'LOW', 'C29F9.5', 'WBGene00016220', 'transcript', 'C29F9.5', 'protein_coding', '3/4', 'c.210T>A', 'p.Ala70Ala', '210/681', '210/681', '70/226', '', '']]
III	118275	A	['G']	{'A', 'G'}	0.0638298	1	TRUE	FALSE	TRUE	0.12015	94	0	6	88	[['G', 'synonymous_variant', 'LOW', 'C29F9.5', 'WBGene00016220', 'transcript', 'C29F9.5', 'protein_coding', '3/4', 'c.243A>G', 'p.Lys81Lys', '243/681', '243/681', '81/226', '', '']]
III	118290	A	['C']	{'A', 'C'}	0.0638298	1	TRUE	FALSE	FALSE	0.12015	94	0	6	88	[['C', 'missense_variant', 'MODERATE', 'C29F9.5', 'WBGene00016220', 'transcript', 'C29F9.5', 'protein_coding', '3/4', 'c.258A>C', 'p.Glu86Asp', '258/681', '258/681', '86/226', '', '']]
III	118296	A	['G']	{'A', 'G'}	0.0638298	1	TRUE	FALSE	TRUE	0.12015	94	0	6	88	[['G', 'synonymous_variant', 'LOW', 'C29F9.5', 'WBGene00016220', 'transcript', 'C29F9.5', 'protein_coding', '3/4', 'c.264A>G', 'p.Pro88Pro', '264/681', '264/681', '88/226', '', '']]
III	118320	G	['A']	{'A', 'G'}	0.0652174	0.978723	TRUE	FALSE	TRUE	0.122594	92	0	6	86	[['A', 'synonymous_variant', 'LOW', 'C29F9.5', 'WBGene00016220', 'transcript', 'C29F9.5', 'protein_coding', '3/4', 'c.288G>A', 'p.Gln96Gln', '288/681', '288/681', '96/226', '', '']]
III	118320	G	['GCGGA']	{'GCGGA', 'G'}	0.0340909	0.93617	FALSE	TRUE	FALSE	0.0662338	88	0	3	85	[['GCGGA', 'frameshift_variant', 'HIGH', 'C29F9.5', 'WBGene00016220', 'transcript', 'C29F9.5', 'protein_coding', '3/4', 'c.290_293dupGGAC', 'p.Ala99fs', '294/681', '294/681', '98/226', '', 'INFO_REALIGN_3_PRIME']]
III	118324	A	['ACGGC']	{'A', 'ACGGC'}	0.0106383	1	FALSE	TRUE	FALSE	0.0211628	94	0	1	93	[['ACGGC', 'frameshift_variant', 'HIGH', 'C29F9.5', 'WBGene00016220', 'transcript', 'C29F9.5', 'protein_coding', '3/4', 'c.293_294insGGCC', 'p.Pro100fs', '294/681', '294/681', '98/226', '', 'INFO_REALIGN_3_PRIME']]
III	118325	C	['CGGAG', 'CGGAA']	{'CGGAG', 'C'}	0.0106383	1	FALSE	TRUE	FALSE	0.0211628	94	0	1	93	[['CGGAA', 'frameshift_variant', 'HIGH', 'C29F9.5', 'WBGene00016220', 'transcript', 'C29F9.5', 'protein_coding', '3/4', 'c.293_294insGGAA', 'p.Ala99fs', '294/681', '294/681', '98/226', '', ''], ['CGGAG', 'frameshift_variant', 'HIGH', 'C29F9.5', 'WBGene00016220', 'transcript', 'C29F9.5', 'protein_coding', '3/4', 'c.293_294insGGAG', 'p.Ala99fs', '294/681', '294/681', '98/226', '', '']]
III	118350	G	['C']	{'G', 'C'}	0.0638298	1	TRUE	FALSE	FALSE	0.12015	94	0	6	88	[['C', 'intron_variant', 'MODIFIER', 'C29F9.5', 'WBGene00016220', 'transcript', 'C29F9.5', 'protein_coding', '3/3', 'c.307+11G>C', '', '', '', '', '', '']]
III	118356	C	['T']	{'T', 'C'}	0.117021	1	TRUE	FALSE	TRUE	0.20776	94	0	11	83	[['T', 'intron_variant', 'MODIFIER', 'C29F9.5', 'WBGene00016220', 'transcript', 'C29F9.5', 'protein_coding', '3/3', 'c.307+17C>T', '', '', '', '', '', '']]
III	118359	C	['T']	{'T', 'C'}	0.0531915	1	TRUE	FALSE	TRUE	0.101263	94	0	5	89	[['T', 'intron_variant', 'MODIFIER', 'C29F9.5', 'WBGene00016220', 'transcript', 'C29F9.5', 'protein_coding', '3/3', 'c.307+20C>T', '', '', '', '', '', '']]
III	118364	C	['T']	{'T', 'C'}	0.117021	1	TRUE	FALSE	TRUE	0.20776	94	0	11	83	[['T', 'intron_variant', 'MODIFIER', 'C29F9.5', 'WBGene00016220', 'transcript', 'C29F9.5', 'protein_coding', '3/3', 'c.307+25C>T', '', '', '', '', '', '']]
III	118376	A	['T', 'G']	{'T', 'A', 'G'}	0.117021	1	TRUE	FALSE	FALSE	0.20776	94	0	11	83	[['G', 'intron_variant', 'MODIFIER', 'C29F9.5', 'WBGene00016220', 'transcript', 'C29F9.5', 'protein_coding', '3/3', 'c.308-18A>G', '', '', '', '', '', ''], ['T', 'intron_variant', 'MODIFIER', 'C29F9.5', 'WBGene00016220', 'transcript', 'C29F9.5', 'protein_coding', '3/3', 'c.308-18A>T', '', '', '', '', '', '']]
III	118379	G	['T']	{'T', 'G'}	0.117021	1	TRUE	FALSE	FALSE	0.20776	94	0	11	83	[['T', 'intron_variant', 'MODIFIER', 'C29F9.5', 'WBGene00016220', 'transcript', 'C29F9.5', 'protein_coding', '3/3', 'c.308-15G>T', '', '', '', '', '', '']]
III	118380	G	['C', 'A']	{'A', 'G', 'C'}	0.117021	1	TRUE	FALSE	FALSE	0.20776	94	0	11	83	[['A', 'intron_variant', 'MODIFIER', 'C29F9.5', 'WBGene00016220', 'transcript', 'C29F9.5', 'protein_coding', '3/3', 'c.308-14G>A', '', '', '', '', '', ''], ['C', 'intron_variant', 'MODIFIER', 'C29F9.5', 'WBGene00016220', 'transcript', 'C29F9.5', 'protein_coding', '3/3', 'c.308-14G>C', '', '', '', '', '', '']]
III	118381	C	['T']	{'T', 'C'}	0.0531915	1	TRUE	FALSE	TRUE	0.101263	94	0	5	89	[['T', 'intron_variant', 'MODIFIER', 'C29F9.5', 'WBGene00016220', 'transcript', 'C29F9.5', 'protein_coding', '3/3', 'c.308-13C>T', '', '', '', '', '', '']]
III	118383	T	['G']	{'T', 'G'}	0.0638298	1	TRUE	FALSE	FALSE	0.12015	94	0	6	88	[['G', 'intron_variant', 'MODIFIER', 'C29F9.5', 'WBGene00016220', 'transcript', 'C29F9.5', 'protein_coding', '3/3', 'c.308-11T>G', '', '', '', '', '', '']]
III	118387	C	['T']	{'T', 'C'}	0.0638298	1	TRUE	FALSE	TRUE	0.12015	94	0	6	88	[['T', 'splice_region_variant&intron_variant', 'LOW', 'C29F9.5', 'WBGene00016220', 'transcript', 'C29F9.5', 'protein_coding', '3/3', 'c.308-7C>T', '', '', '', '', '', '']]
III	118390	T	['C']	{'T', 'C'}	0.0638298	1	TRUE	FALSE	TRUE	0.12015	94	0	6	88	[['C', 'splice_region_variant&intron_variant', 'LOW', 'C29F9.5', 'WBGene00016220', 'transcript', 'C29F9.5', 'protein_coding', '3/3', 'c.308-4T>C', '', '', '', '', '', '']]
III	118395	C	['A']	{'A', 'C'}	0.0638298	1	TRUE	FALSE	FALSE	0.12015	94	0	6	88	[['A', 'missense_variant&splice_region_variant', 'MODERATE', 'C29F9.5', 'WBGene00016220', 'transcript', 'C29F9.5', 'protein_coding', '4/4', 'c.309C>A', 'p.Asp103Glu', '309/681', '309/681', '103/226', '', '']]
III	118402	C	['T']	{'T', 'C'}	0.0531915	1	TRUE	FALSE	TRUE	0.101263	94	0	5	89	[['T', 'missense_variant', 'MODERATE', 'C29F9.5', 'WBGene00016220', 'transcript', 'C29F9.5', 'protein_coding', '4/4', 'c.316C>T', 'p.Pro106Ser', '316/681', '316/681', '106/226', '', '']]
III	118404	T	['C']	{'T', 'C'}	0.0638298	1	TRUE	FALSE	TRUE	0.12015	94	0	6	88	[['C', 'synonymous_variant', 'LOW', 'C29F9.5', 'WBGene00016220', 'transcript', 'C29F9.5', 'protein_coding', '4/4', 'c.318T>C', 'p.Pro106Pro', '318/681', '318/681', '106/226', '', '']]
III	118416	A	['G']	{'A', 'G'}	0.0638298	1	TRUE	FALSE	TRUE	0.12015	94	0	6	88	[['G', 'synonymous_variant', 'LOW', 'C29F9.5', 'WBGene00016220', 'transcript', 'C29F9.5', 'protein_coding', '4/4', 'c.330A>G', 'p.Lys110Lys', '330/681', '330/681', '110/226', '', '']]
III	118419	A	['G', 'C']	{'A', 'G'}	0.0638298	1	TRUE	FALSE	FALSE	0.12015	94	0	6	88	[['C', 'missense_variant', 'MODERATE', 'C29F9.5', 'WBGene00016220', 'transcript', 'C29F9.5', 'protein_coding', '4/4', 'c.333A>C', 'p.Lys111Asn', '333/681', '333/681', '111/226', '', ''], ['G', 'synonymous_variant', 'LOW', 'C29F9.5', 'WBGene00016220', 'transcript', 'C29F9.5', 'protein_coding', '4/4', 'c.333A>G', 'p.Lys111Lys', '333/681', '333/681', '111/226', '', '']]
III	118422	A	['T']	{'T', 'A'}	0.0638298	1	TRUE	FALSE	FALSE	0.12015	94	0	6	88	[['T', 'synonymous_variant', 'LOW', 'C29F9.5', 'WBGene00016220', 'transcript', 'C29F9.5', 'protein_coding', '4/4', 'c.336A>T', 'p.Pro112Pro', '336/681', '336/681', '112/226', '', '']]
III	118431	C	['T']	{'T', 'C'}	0.0638298	1	TRUE	FALSE	TRUE	0.12015	94	0	6	88	[['T', 'synonymous_variant', 'LOW', 'C29F9.5', 'WBGene00016220', 'transcript', 'C29F9.5', 'protein_coding', '4/4', 'c.345C>T', 'p.Asp115Asp', '345/681', '345/681', '115/226', '', '']]
III	118440	G	['C']	{'G', 'C'}	0.0531915	1	TRUE	FALSE	FALSE	0.101263	94	0	5	89	[['C', 'missense_variant', 'MODERATE', 'C29F9.5', 'WBGene00016220', 'transcript', 'C29F9.5', 'protein_coding', '4/4', 'c.354G>C', 'p.Trp118Cys', '354/681', '354/681', '118/226', '', '']]
III	118453	C	['T']	{'T', 'C'}	0.0531915	1	TRUE	FALSE	TRUE	0.101263	94	0	5	89	[['T', 'missense_variant', 'MODERATE', 'C29F9.5', 'WBGene00016220', 'transcript', 'C29F9.5', 'protein_coding', '4/4', 'c.367C>T', 'p.Pro123Ser', '367/681', '367/681', '123/226', '', '']]
III	118458	A	['G']	{'A', 'G'}	0.0638298	1	TRUE	FALSE	TRUE	0.12015	94	0	6	88	[['G', 'synonymous_variant', 'LOW', 'C29F9.5', 'WBGene00016220', 'transcript', 'C29F9.5', 'protein_coding', '4/4', 'c.372A>G', 'p.Lys124Lys', '372/681', '372/681', '124/226', '', '']]
III	118460	C	['G']	{'G', 'C'}	0.0212766	1	TRUE	FALSE	FALSE	0.0418705	94	0	2	92	[['G', 'missense_variant', 'MODERATE', 'C29F9.5', 'WBGene00016220', 'transcript', 'C29F9.5', 'protein_coding', '4/4', 'c.374C>G', 'p.Thr125Ser', '374/681', '374/681', '125/226', '', '']]
III	118470	C	['T']	{'T', 'C'}	0.0638298	1	TRUE	FALSE	TRUE	0.12015	94	0	6	88	[['T', 'synonymous_variant', 'LOW', 'C29F9.5', 'WBGene00016220', 'transcript', 'C29F9.5', 'protein_coding', '4/4', 'c.384C>T', 'p.Ser128Ser', '384/681', '384/681', '128/226', '', '']]
III	118473	A	['G']	{'A', 'G'}	0.117021	1	TRUE	FALSE	TRUE	0.20776	94	0	11	83	[['G', 'synonymous_variant', 'LOW', 'C29F9.5', 'WBGene00016220', 'transcript', 'C29F9.5', 'protein_coding', '4/4', 'c.387A>G', 'p.Glu129Glu', '387/681', '387/681', '129/226', '', '']]
III	118497	A	['C']	{'A', 'C'}	0.0638298	1	TRUE	FALSE	FALSE	0.12015	94	0	6	88	[['C', 'synonymous_variant', 'LOW', 'C29F9.5', 'WBGene00016220', 'transcript', 'C29F9.5', 'protein_coding', '4/4', 'c.411A>C', 'p.Gly137Gly', '411/681', '411/681', '137/226', '', '']]
III	118506	C	['G', 'T']	{'T', 'G', 'C'}	0.117021	1	TRUE	FALSE	FALSE	0.20776	94	0	11	83	[['G', 'synonymous_variant', 'LOW', 'C29F9.5', 'WBGene00016220', 'transcript', 'C29F9.5', 'protein_coding', '4/4', 'c.420C>G', 'p.Ser140Ser', '420/681', '420/681', '140/226', '', ''], ['T', 'synonymous_variant', 'LOW', 'C29F9.5', 'WBGene00016220', 'transcript', 'C29F9.5', 'protein_coding', '4/4', 'c.420C>T', 'p.Ser140Ser', '420/681', '420/681', '140/226', '', '']]
III	118512	G	['T']	{'T', 'G'}	0.0638298	1	TRUE	FALSE	FALSE	0.12015	94	0	6	88	[['T', 'synonymous_variant', 'LOW', 'C29F9.5', 'WBGene00016220', 'transcript', 'C29F9.5', 'protein_coding', '4/4', 'c.426G>T', 'p.Val142Val', '426/681', '426/681', '142/226', '', '']]
III	118521	T	['A']	{'T', 'A'}	0.0638298	1	TRUE	FALSE	FALSE	0.12015	94	0	6	88	[['A', 'synonymous_variant', 'LOW', 'C29F9.5', 'WBGene00016220', 'transcript', 'C29F9.5', 'protein_coding', '4/4', 'c.435T>A', 'p.Gly145Gly', '435/681', '435/681', '145/226', '', '']]
III	118525	C	['T']	{'T', 'C'}	0.0638298	1	TRUE	FALSE	TRUE	0.12015	94	0	6	88	[['T', 'synonymous_variant', 'LOW', 'C29F9.5', 'WBGene00016220', 'transcript', 'C29F9.5', 'protein_coding', '4/4', 'c.439C>T', 'p.Leu147Leu', '439/681', '439/681', '147/226', '', '']]
III	118533	G	['A']	{'A', 'G'}	0.0638298	1	TRUE	FALSE	TRUE	0.12015	94	0	6	88	[['A', 'synonymous_variant', 'LOW', 'C29F9.5', 'WBGene00016220', 'transcript', 'C29F9.5', 'protein_coding', '4/4', 'c.447G>A', 'p.Glu149Glu', '447/681', '447/681', '149/226', '', '']]
III	118536	C	['T']	{'T', 'C'}	0.0638298	1	TRUE	FALSE	TRUE	0.12015	94	0	6	88	[['T', 'synonymous_variant', 'LOW', 'C29F9.5', 'WBGene00016220', 'transcript', 'C29F9.5', 'protein_coding', '4/4', 'c.450C>T', 'p.Ala150Ala', '450/681', '450/681', '150/226', '', '']]
III	118545	T	['G']	{'T', 'G'}	0.0638298	1	TRUE	FALSE	FALSE	0.12015	94	0	6	88	[['G', 'missense_variant', 'MODERATE', 'C29F9.5', 'WBGene00016220', 'transcript', 'C29F9.5', 'protein_coding', '4/4', 'c.459T>G', 'p.Asp153Glu', '459/681', '459/681', '153/226', '', '']]
III	118548	C	['A']	{'A', 'C'}	0.0638298	1	TRUE	FALSE	FALSE	0.12015	94	0	6	88	[['A', 'synonymous_variant', 'LOW', 'C29F9.5', 'WBGene00016220', 'transcript', 'C29F9.5', 'protein_coding', '4/4', 'c.462C>A', 'p.Thr154Thr', '462/681', '462/681', '154/226', '', '']]
III	118575	G	['A']	{'A', 'G'}	0.0638298	1	TRUE	FALSE	TRUE	0.12015	94	0	6	88	[['A', 'synonymous_variant', 'LOW', 'C29F9.5', 'WBGene00016220', 'transcript', 'C29F9.5', 'protein_coding', '4/4', 'c.489G>A', 'p.Glu163Glu', '489/681', '489/681', '163/226', '', '']]
III	118584	C	['T']	{'T', 'C'}	0.0638298	1	TRUE	FALSE	TRUE	0.12015	94	0	6	88	[['T', 'synonymous_variant', 'LOW', 'C29F9.5', 'WBGene00016220', 'transcript', 'C29F9.5', 'protein_coding', '4/4', 'c.498C>T', 'p.Ile166Ile', '498/681', '498/681', '166/226', '', '']]
III	118587	C	['T']	{'T', 'C'}	0.0638298	1	TRUE	FALSE	TRUE	0.12015	94	0	6	88	[['T', 'synonymous_variant', 'LOW', 'C29F9.5', 'WBGene00016220', 'transcript', 'C29F9.5', 'protein_coding', '4/4', 'c.501C>T', 'p.Phe167Phe', '501/681', '501/681', '167/226', '', '']]
III	118596	C	['T']	{'T', 'C'}	0.0638298	1	TRUE	FALSE	TRUE	0.12015	94	0	6	88	[['T', 'synonymous_variant', 'LOW', 'C29F9.5', 'WBGene00016220', 'transcript', 'C29F9.5', 'protein_coding', '4/4', 'c.510C>T', 'p.Ala170Ala', '510/681', '510/681', '170/226', '', '']]
III	118601	A	['C']	{'A', 'C'}	0.117021	1	TRUE	FALSE	FALSE	0.20776	94	0	11	83	[['C', 'missense_variant', 'MODERATE', 'C29F9.5', 'WBGene00016220', 'transcript', 'C29F9.5', 'protein_coding', '4/4', 'c.515A>C', 'p.Lys172Thr', '515/681', '515/681', '172/226', '', '']]
III	118603	C	['T']	{'T', 'C'}	0.0638298	1	TRUE	FALSE	TRUE	0.12015	94	0	6	88	[['T', 'synonymous_variant', 'LOW', 'C29F9.5', 'WBGene00016220', 'transcript', 'C29F9.5', 'protein_coding', '4/4', 'c.517C>T', 'p.Leu173Leu', '517/681', '517/681', '173/226', '', '']]
III	118608	A	['G']	{'A', 'G'}	0.0638298	1	TRUE	FALSE	TRUE	0.12015	94	0	6	88	[['G', 'synonymous_variant', 'LOW', 'C29F9.5', 'WBGene00016220', 'transcript', 'C29F9.5', 'protein_coding', '4/4', 'c.522A>G', 'p.Glu174Glu', '522/681', '522/681', '174/226', '', '']]
III	118610	C	['G']	{'G', 'C'}	0.0638298	1	TRUE	FALSE	FALSE	0.12015	94	0	6	88	[['G', 'missense_variant', 'MODERATE', 'C29F9.5', 'WBGene00016220', 'transcript', 'C29F9.5', 'protein_coding', '4/4', 'c.524C>G', 'p.Ala175Gly', '524/681', '524/681', '175/226', '', '']]
III	118612	T	['C']	{'T', 'C'}	0.0212766	1	TRUE	FALSE	TRUE	0.0418705	94	0	2	92	[['C', 'missense_variant', 'MODERATE', 'C29F9.5', 'WBGene00016220', 'transcript', 'C29F9.5', 'protein_coding', '4/4', 'c.526T>C', 'p.Tyr176His', '526/681', '526/681', '176/226', '', '']]
III	118624	G	['T']	{'T', 'G'}	0.0638298	1	TRUE	FALSE	FALSE	0.12015	94	0	6	88	[['T', 'missense_variant', 'MODERATE', 'C29F9.5', 'WBGene00016220', 'transcript', 'C29F9.5', 'protein_coding', '4/4', 'c.538G>T', 'p.Ala180Ser', '538/681', '538/681', '180/226', '', '']]
III	118638	T	['C']	{'T', 'C'}	0.117021	1	TRUE	FALSE	TRUE	0.20776	94	0	11	83	[['C', 'synonymous_variant', 'LOW', 'C29F9.5', 'WBGene00016220', 'transcript', 'C29F9.5', 'protein_coding', '4/4', 'c.552T>C', 'p.Val184Val', '552/681', '552/681', '184/226', '', '']]
III	118665	A	['G']	{'A', 'G'}	0.0645161	0.989362	TRUE	FALSE	TRUE	0.12136	93	0	6	87	[['G', 'synonymous_variant', 'LOW', 'C29F9.5', 'WBGene00016220', 'transcript', 'C29F9.5', 'protein_coding', '4/4', 'c.579A>G', 'p.Arg193Arg', '579/681', '579/681', '193/226', '', '']]
III	118679	A	['T']	{'T', 'A'}	0.0638298	1	TRUE	FALSE	FALSE	0.12015	94	0	6	88	[['T', 'missense_variant', 'MODERATE', 'C29F9.5', 'WBGene00016220', 'transcript', 'C29F9.5', 'protein_coding', '4/4', 'c.593A>T', 'p.Glu198Val', '593/681', '593/681', '198/226', '', '']]
III	118690	G	['C']	{'G', 'C'}	0.0638298	1	TRUE	FALSE	FALSE	0.12015	94	0	6	88	[['C', 'missense_variant', 'MODERATE', 'C29F9.5', 'WBGene00016220', 'transcript', 'C29F9.5', 'protein_coding', '4/4', 'c.604G>C', 'p.Glu202Gln', '604/681', '604/681', '202/226', '', '']]
III	118698	T	['A']	{'T', 'A'}	0.0638298	1	TRUE	FALSE	FALSE	0.12015	94	0	6	88	[['A', 'missense_variant', 'MODERATE', 'C29F9.5', 'WBGene00016220', 'transcript', 'C29F9.5', 'protein_coding', '4/4', 'c.612T>A', 'p.Asp204Glu', '612/681', '612/681', '204/226', '', '']]
III	118700	G	['A']	{'A', 'G'}	0.0638298	1	TRUE	FALSE	TRUE	0.12015	94	0	6	88	[['A', 'missense_variant', 'MODERATE', 'C29F9.5', 'WBGene00016220', 'transcript', 'C29F9.5', 'protein_coding', '4/4', 'c.614G>A', 'p.Gly205Asp', '614/681', '614/681', '205/226', '', '']]
III	118701	T	['A']	{'T', 'A'}	0.0638298	1	TRUE	FALSE	FALSE	0.12015	94	0	6	88	[['A', 'synonymous_variant', 'LOW', 'C29F9.5', 'WBGene00016220', 'transcript', 'C29F9.5', 'protein_coding', '4/4', 'c.615T>A', 'p.Gly205Gly', '615/681', '615/681', '205/226', '', '']]
III	118702	T	['A']	{'T', 'A'}	0.0638298	1	TRUE	FALSE	FALSE	0.12015	94	0	6	88	[['A', 'missense_variant', 'MODERATE', 'C29F9.5', 'WBGene00016220', 'transcript', 'C29F9.5', 'protein_coding', '4/4', 'c.616T>A', 'p.Ser206Thr', '616/681', '616/681', '206/226', '', '']]
III	118707	G	['A']	{'A', 'G'}	0.0638298	1	TRUE	FALSE	TRUE	0.12015	94	0	6	88	[['A', 'synonymous_variant', 'LOW', 'C29F9.5', 'WBGene00016220', 'transcript', 'C29F9.5', 'protein_coding', '4/4', 'c.621G>A', 'p.Glu207Glu', '621/681', '621/681', '207/226', '', '']]
III	118725	C	['T']	{'T', 'C'}	0.0531915	1	TRUE	FALSE	TRUE	0.101263	94	0	5	89	[['T', 'synonymous_variant', 'LOW', 'C29F9.5', 'WBGene00016220', 'transcript', 'C29F9.5', 'protein_coding', '4/4', 'c.639C>T', 'p.Asp213Asp', '639/681', '639/681', '213/226', '', '']]
III	118730	G	['A']	{'A', 'G'}	0.117021	1	TRUE	FALSE	TRUE	0.20776	94	0	11	83	[['A', 'missense_variant', 'MODERATE', 'C29F9.5', 'WBGene00016220', 'transcript', 'C29F9.5', 'protein_coding', '4/4', 'c.644G>A', 'p.Arg215His', '644/681', '644/681', '215/226', '', '']]
III	118754	A	['T']	{'T', 'A'}	0.117021	1	TRUE	FALSE	FALSE	0.20776	94	0	11	83	[['T', 'missense_variant', 'MODERATE', 'C29F9.5', 'WBGene00016220', 'transcript', 'C29F9.5', 'protein_coding', '4/4', 'c.668A>T', 'p.Tyr223Phe', '668/681', '668/681', '223/226', '', '']]
III	118760	G	['A']	{'A', 'G'}	0.117021	1	TRUE	FALSE	TRUE	0.20776	94	0	11	83	[['A', 'missense_variant', 'MODERATE', 'C29F9.5', 'WBGene00016220', 'transcript', 'C29F9.5', 'protein_coding', '4/4', 'c.674G>A', 'p.Gly225Asp', '674/681', '674/681', '225/226', '', '']]
III	118764	C	['T']	{'T', 'C'}	0.117021	1	TRUE	FALSE	TRUE	0.20776	94	0	11	83	[['T', 'synonymous_variant', 'LOW', 'C29F9.5', 'WBGene00016220', 'transcript', 'C29F9.5', 'protein_coding', '4/4', 'c.678C>T', 'p.Ser226Ser', '678/681', '678/681', '226/226', '', '']]
III	118771	C	['T']	{'T', 'C'}	0.0531915	1	TRUE	FALSE	TRUE	0.101263	94	0	5	89
III	118775	T	['C']	{'T', 'C'}	0.111702	1	TRUE	FALSE	TRUE	0.199511	94	1	10	83
III	118790	T	['C']	{'T', 'C'}	0.0531915	1	TRUE	FALSE	TRUE	0.101263	94	0	5	89
III	118828	C	['A']	{'A', 'C'}	0.0212766	1	TRUE	FALSE	FALSE	0.0418705	94	0	2	92
III	118830	A	['C']	{'A', 'C'}	0.0531915	1	TRUE	FALSE	FALSE	0.101263	94	0	5	89
III	118857	G	['T']	{'T', 'G'}	0.0638298	1	TRUE	FALSE	FALSE	0.12015	94	0	6	88
III	118862	T	['C']	{'T', 'C'}	0.0638298	1	TRUE	FALSE	TRUE	0.12015	94	0	6	88
III	118863	T	['TC']	{'T', 'TC'}	0.0531915	1	FALSE	TRUE	FALSE	0.101263	94	0	5	89
III	118872	G	['C']	{'G', 'C'}	0.0531915	1	TRUE	FALSE	FALSE	0.101263	94	0	5	89
III	118906	G	['A']	{'A', 'G'}	0.0106383	1	TRUE	FALSE	TRUE	0.0211628	94	0	1	93
III	118909	A	['AT']	{'A', 'AT'}	0.585106	1	FALSE	TRUE	FALSE	0.48811	94	0	55	39
III	118960	TTGATG	['T']	{'T', 'TTGATG'}	0.0106383	1	FALSE	TRUE	FALSE	0.0211628	94	0	1	93
III	118979	G	['T']	{'T', 'G'}	0.0561798	0.946809	TRUE	FALSE	FALSE	0.106646	89	0	5	84
III	118983	A	['T']	{'T', 'A'}	0.0561798	0.946809	TRUE	FALSE	FALSE	0.106646	89	0	5	84
III	118992	A	['G']	{'A', 'G'}	0.0561798	0.946809	TRUE	FALSE	TRUE	0.106646	89	0	5	84
III	119026	A	['T']	{'T', 'A'}	0.0561798	0.946809	TRUE	FALSE	FALSE	0.106646	89	0	5	84
III	119034	G	['A']	{'A', 'G'}	0.0561798	0.946809	TRUE	FALSE	TRUE	0.106646	89	0	5	84
III	119052	C	['T']	{'T', 'C'}	0.011236	0.946809	TRUE	FALSE	TRUE	0.022345	89	0	1	88
III	119077	C	['G']	{'G', 'C'}	0.0561798	0.946809	TRUE	FALSE	FALSE	0.106646	89	0	5	84
III	119098	T	['C']	{'T', 'C'}	0.0561798	0.946809	TRUE	FALSE	TRUE	0.106646	89	0	5	84
III	119103	C	['T']	{'T', 'C'}	0.0561798	0.946809	TRUE	FALSE	TRUE	0.106646	89	0	5	84
III	119106	T	['C']	{'T', 'C'}	0.0561798	0.946809	TRUE	FALSE	TRUE	0.106646	89	0	5	84
III	119110	C	['T']	{'T', 'C'}	0.0561798	0.946809	TRUE	FALSE	TRUE	0.106646	89	0	5	84
III	119113	G	['T']	{'T', 'G'}	0.0561798	0.946809	TRUE	FALSE	FALSE	0.106646	89	0	5	84
III	119118	A	['T']	{'T', 'A'}	0.0561798	0.946809	TRUE	FALSE	FALSE	0.106646	89	0	5	84
III	119127	A	['T']	{'T', 'A'}	0.0561798	0.946809	TRUE	FALSE	FALSE	0.106646	89	0	5	84
III	119129	A	['C']	{'A', 'C'}	0.0561798	0.946809	TRUE	FALSE	FALSE	0.106646	89	0	5	84
III	119140	T	['A']	{'T', 'A'}	0.0561798	0.946809	TRUE	FALSE	FALSE	0.106646	89	0	5	84
III	119144	A	['C']	{'A', 'C'}	0.0561798	0.946809	TRUE	FALSE	FALSE	0.106646	89	0	5	84
III	119148	C	['A']	{'A', 'C'}	0.0561798	0.946809	TRUE	FALSE	FALSE	0.106646	89	0	5	84
III	119152	T	['G']	{'T', 'G'}	0.0561798	0.946809	TRUE	FALSE	FALSE	0.106646	89	0	5	84
III	119167	A	['T', 'C']	{'T', 'A'}	0.0561798	0.946809	TRUE	FALSE	FALSE	0.106646	89	0	5	84
III	119205	T	['C']	{'T', 'C'}	0.0505618	0.946809	TRUE	FALSE	TRUE	0.096553	89	1	4	84
III	119215	G	['A']	{'A', 'G'}	0.0505618	0.946809	TRUE	FALSE	TRUE	0.096553	89	1	4	84
III	119218	C	['T']	{'T', 'C'}	0.0505618	0.946809	TRUE	FALSE	TRUE	0.096553	89	1	4	84
III	119223	C	['T']	{'T', 'C'}	0.0505618	0.946809	TRUE	FALSE	TRUE	0.096553	89	1	4	84
III	119225	G	['T']	{'T', 'G'}	0.0505618	0.946809	TRUE	FALSE	FALSE	0.096553	89	1	4	84
III	119332	T	['C']	{'T', 'C'}	0.0222222	0.957447	TRUE	FALSE	TRUE	0.0436996	90	0	2	88
III	119339	C	['T']	{'T', 'C'}	0.0111111	0.957447	TRUE	FALSE	TRUE	0.0220981	90	0	1	89
III	119374	A	['G']	{'A', 'G'}	0.0222222	0.957447	TRUE	FALSE	TRUE	0.0436996	90	0	2	88
III	119378	G	['A']	{'A', 'G'}	0.0555556	0.957447	TRUE	FALSE	TRUE	0.105525	90	0	5	85
III	119396	C	['T']	{'T', 'C'}	0.0555556	0.957447	TRUE	FALSE	TRUE	0.105525	90	0	5	85
III	119503	G	['A']	{'A', 'G'}	0.0555556	0.957447	TRUE	FALSE	TRUE	0.105525	90	0	5	85
III	119512	A	['G']	{'A', 'G'}	0.0555556	0.957447	TRUE	FALSE	TRUE	0.105525	90	0	5	85
III	119534	T	['C']	{'T', 'C'}	0.0555556	0.957447	TRUE	FALSE	TRUE	0.105525	90	0	5	85
III	119540	T	['C']	{'T', 'C'}	0.0555556	0.957447	TRUE	FALSE	TRUE	0.105525	90	0	5	85
III	119569	T	['C']	{'T', 'C'}	0.032967	0.968085	TRUE	FALSE	TRUE	0.0641127	91	0	3	88
III	119597	A	['C']	{'A', 'C'}	0.0638298	1	TRUE	FALSE	FALSE	0.12015	94	0	6	88
III	119610	A	['G']	{'A', 'G'}	0.0531915	1	TRUE	FALSE	TRUE	0.101263	94	0	5	89
III	119611	G	['A']	{'A', 'G'}	0.0531915	1	TRUE	FALSE	TRUE	0.101263	94	0	5	89
III	119619	A	['G']	{'A', 'G'}	0.0638298	1	TRUE	FALSE	TRUE	0.12015	94	0	6	88
III	119624	A	['G']	{'A', 'G'}	0.0638298	1	TRUE	FALSE	TRUE	0.12015	94	0	6	88
III	119625	C	['A']	{'A', 'C'}	0.0638298	1	TRUE	FALSE	FALSE	0.12015	94	0	6	88
III	119656	G	['A']	{'A', 'G'}	0.0531915	1	TRUE	FALSE	TRUE	0.101263	94	0	5	89
III	119701	A	['G']	{'A', 'G'}	0.0537634	0.989362	TRUE	FALSE	TRUE	0.102296	93	0	5	88
III	119713	G	['A']	{'A', 'G'}	0.0531915	1	TRUE	FALSE	TRUE	0.101263	94	0	5	89
III	119714	C	['A']	{'A', 'C'}	0.0531915	1	TRUE	FALSE	FALSE	0.101263	94	0	5	89
III	119715	C	['G']	{'G', 'C'}	0.106383	1	TRUE	FALSE	FALSE	0.191148	94	0	10	84
III	119723	T	['A']	{'T', 'A'}	0.0531915	1	TRUE	FALSE	FALSE	0.101263	94	0	5	89
III	119730	T	['C']	{'T', 'C'}	0.106383	1	TRUE	FALSE	TRUE	0.191148	94	0	10	84
III	119737	A	['G']	{'A', 'G'}	0.0531915	1	TRUE	FALSE	TRUE	0.101263	94	0	5	89
III	119741	A	['C']	{'A', 'C'}	0.106383	1	TRUE	FALSE	FALSE	0.191148	94	0	10	84
III	119750	C	['T']	{'T', 'C'}	0.0212766	1	TRUE	FALSE	TRUE	0.0418705	94	0	2	92
III	119763	A	['G']	{'A', 'G'}	0.117021	1	TRUE	FALSE	TRUE	0.20776	94	0	11	83
III	119764	C	['T']	{'T', 'C'}	0.0212766	1	TRUE	FALSE	TRUE	0.0418705	94	0	2	92
III	119775	A	['G']	{'A', 'G'}	0.117021	1	TRUE	FALSE	TRUE	0.20776	94	0	11	83
III	119780	T	['A']	{'T', 'A'}	0.0531915	1	TRUE	FALSE	FALSE	0.101263	94	0	5	89
III	119781	G	['T']	{'T', 'G'}	0.0531915	1	TRUE	FALSE	FALSE	0.101263	94	0	5	89
III	119791	G	['A']	{'A', 'G'}	0.0531915	1	TRUE	FALSE	TRUE	0.101263	94	0	5	89
III	119793	G	['A']	{'A', 'G'}	0.0531915	1	TRUE	FALSE	TRUE	0.101263	94	0	5	89
III	119799	A	['T']	{'T', 'A'}	0.0561798	0.946809	TRUE	FALSE	FALSE	0.106646	89	0	5	84
III	119836	T	['C']	{'T', 'C'}	0.0555556	0.957447	TRUE	FALSE	TRUE	0.105525	90	0	5	85
III	119839	T	['C']	{'T', 'C'}	0.0555556	0.957447	TRUE	FALSE	TRUE	0.105525	90	0	5	85
III	119842	A	['C']	{'A', 'C'}	0.0555556	0.957447	TRUE	FALSE	FALSE	0.105525	90	0	5	85
III	119859	A	['G']	{'A', 'G'}	0.0555556	0.957447	TRUE	FALSE	TRUE	0.105525	90	0	5	85
III	119943	C	['T']	{'T', 'C'}	0.0337079	0.946809	TRUE	FALSE	TRUE	0.0655113	89	0	3	86
III	120062	T	['C']	{'T', 'C'}	0.0666667	0.957447	TRUE	FALSE	TRUE	0.12514	90	0	6	84
III	120081	G	['GA']	{'GA', 'G'}	0.0666667	0.957447	FALSE	TRUE	FALSE	0.12514	90	0	6	84
III	120185	G	['A']	{'A', 'G'}	0.0691489	1	TRUE	FALSE	TRUE	0.129423	94	1	6	87
III	120188	C	['T']	{'T', 'C'}	0.0638298	1	TRUE	FALSE	TRUE	0.12015	94	0	6	88
III	120226	T	['C']	{'T', 'C'}	0.0638298	1	TRUE	FALSE	TRUE	0.12015	94	0	6	88
III	120230	G	['A']	{'A', 'G'}	0.0638298	1	TRUE	FALSE	TRUE	0.12015	94	0	6	88
III	120233	T	['A']	{'T', 'A'}	0.0638298	1	TRUE	FALSE	FALSE	0.12015	94	0	6	88
III	120240	T	['C']	{'T', 'C'}	0.0638298	1	TRUE	FALSE	TRUE	0.12015	94	0	6	88
III	120263	C	['G']	{'G', 'C'}	0.0638298	1	TRUE	FALSE	FALSE	0.12015	94	0	6	88
III	120264	T	['G']	{'T', 'G'}	0.0638298	1	TRUE	FALSE	FALSE	0.12015	94	0	6	88
III	120265	C	['T']	{'T', 'C'}	0.0638298	1	TRUE	FALSE	TRUE	0.12015	94	0	6	88
III	120268	A	['C']	{'A', 'C'}	0.0638298	1	TRUE	FALSE	FALSE	0.12015	94	0	6	88
III	120273	G	['T']	{'T', 'G'}	0.0638298	1	TRUE	FALSE	FALSE	0.12015	94	0	6	88
III	120279	G	['A']	{'A', 'G'}	0.0638298	1	TRUE	FALSE	TRUE	0.12015	94	0	6	88
III	120296	T	['C']	{'T', 'C'}	0.0638298	1	TRUE	FALSE	TRUE	0.12015	94	0	6	88
III	120304	A	['G']	{'A', 'G'}	0.0638298	1	TRUE	FALSE	TRUE	0.12015	94	0	6	88
III	120333	C	['T']	{'T', 'C'}	0.0638298	1	TRUE	FALSE	TRUE	0.12015	94	0	6	88
III	120356	G	['A']	{'A', 'G'}	0.0638298	1	TRUE	FALSE	TRUE	0.12015	94	0	6	88
III	120357	T	['G']	{'T', 'G'}	0.0638298	1	TRUE	FALSE	FALSE	0.12015	94	0	6	88
III	120365	C	['T']	{'T', 'C'}	0.0638298	1	TRUE	FALSE	TRUE	0.12015	94	0	6	88
III	120372	T	['A']	{'T', 'A'}	0.0691489	1	TRUE	FALSE	FALSE	0.129423	94	1	6	87
III	120375	C	['T']	{'T', 'C'}	0.0638298	1	TRUE	FALSE	TRUE	0.12015	94	0	6	88
III	120433	T	['TC']	{'T', 'TC'}	0.0638298	1	FALSE	TRUE	FALSE	0.12015	94	0	6	88
III	120446	A	['G']	{'A', 'G'}	0.0638298	1	TRUE	FALSE	TRUE	0.12015	94	0	6	88
III	120457	T	['A']	{'T', 'A'}	0.0638298	1	TRUE	FALSE	FALSE	0.12015	94	0	6	88
III	120502	G	['C']	{'G', 'C'}	0.0638298	1	TRUE	FALSE	FALSE	0.12015	94	0	6	88	[['C', 'missense_variant', 'MODERATE', 'pals-24', 'WBGene00016219', 'transcript', 'C29F9.4', 'protein_coding', '1/10', 'c.11G>C', 'p.Arg4Pro', '11/906', '11/906', '4/301', '', '']]
III	120535	C	['T']	{'T', 'C'}	0.0691489	1	TRUE	FALSE	TRUE	0.129423	94	1	6	87	[['T', 'intron_variant', 'MODIFIER', 'pals-24', 'WBGene00016219', 'transcript', 'C29F9.4', 'protein_coding', '1/9', 'c.25+19C>T', '', '', '', '', '', '']]
III	120566	C	['T']	{'T', 'C'}	0.0691489	1	TRUE	FALSE	TRUE	0.129423	94	1	6	87	[['T', 'synonymous_variant', 'LOW', 'pals-24', 'WBGene00016219', 'transcript', 'C29F9.4', 'protein_coding', '2/10', 'c.31C>T', 'p.Leu11Leu', '31/906', '31/906', '11/301', '', '']]
III	120577	T	['C']	{'T', 'C'}	0.0691489	1	TRUE	FALSE	TRUE	0.129423	94	1	6	87	[['C', 'synonymous_variant', 'LOW', 'pals-24', 'WBGene00016219', 'transcript', 'C29F9.4', 'protein_coding', '2/10', 'c.42T>C', 'p.Leu14Leu', '42/906', '42/906', '14/301', '', '']]
III	120581	A	['G']	{'A', 'G'}	0.0691489	1	TRUE	FALSE	TRUE	0.129423	94	1	6	87	[['G', 'missense_variant', 'MODERATE', 'pals-24', 'WBGene00016219', 'transcript', 'C29F9.4', 'protein_coding', '2/10', 'c.46A>G', 'p.Lys16Glu', '46/906', '46/906', '16/301', '', '']]
III	120585	T	['C']	{'T', 'C'}	0.0691489	1	TRUE	FALSE	TRUE	0.129423	94	1	6	87	[['C', 'missense_variant', 'MODERATE', 'pals-24', 'WBGene00016219', 'transcript', 'C29F9.4', 'protein_coding', '2/10', 'c.50T>C', 'p.Ile17Thr', '50/906', '50/906', '17/301', '', '']]
III	120591	T	['C']	{'T', 'C'}	0.0691489	1	TRUE	FALSE	TRUE	0.129423	94	1	6	87	[['C', 'missense_variant&splice_region_variant', 'MODERATE', 'pals-24', 'WBGene00016219', 'transcript', 'C29F9.4', 'protein_coding', '2/10', 'c.56T>C', 'p.Leu19Ser', '56/906', '56/906', '19/301', '', '']]
III	120596	G	['A']	{'A', 'G'}	0.0638298	1	TRUE	FALSE	TRUE	0.12015	94	0	6	88	[['A', 'splice_region_variant&intron_variant', 'LOW', 'pals-24', 'WBGene00016219', 'transcript', 'C29F9.4', 'protein_coding', '2/9', 'c.57+4G>A', '', '', '', '', '', '']]
III	120601	T	['A']	{'T', 'A'}	0.0691489	1	TRUE	FALSE	FALSE	0.129423	94	1	6	87	[['A', 'intron_variant', 'MODIFIER', 'pals-24', 'WBGene00016219', 'transcript', 'C29F9.4', 'protein_coding', '2/9', 'c.57+9T>A', '', '', '', '', '', '']]
III	120604	C	['A']	{'A', 'C'}	0.0691489	1	TRUE	FALSE	FALSE	0.129423	94	1	6	87	[['A', 'intron_variant', 'MODIFIER', 'pals-24', 'WBGene00016219', 'transcript', 'C29F9.4', 'protein_coding', '2/9', 'c.57+12C>A', '', '', '', '', '', '']]
III	120607	G	['A']	{'A', 'G'}	0.0744681	1	TRUE	FALSE	TRUE	0.138582	94	0	7	87	[['A', 'intron_variant', 'MODIFIER', 'pals-24', 'WBGene00016219', 'transcript', 'C29F9.4', 'protein_coding', '2/9', 'c.57+15G>A', '', '', '', '', '', '']]
III	120613	C	['T']	{'T', 'C'}	0.0744681	1	TRUE	FALSE	TRUE	0.138582	94	0	7	87	[['T', 'intron_variant', 'MODIFIER', 'pals-24', 'WBGene00016219', 'transcript', 'C29F9.4', 'protein_coding', '2/9', 'c.57+21C>T', '', '', '', '', '', '']]
III	120614	T	['C']	{'T', 'C'}	0.0744681	1	TRUE	FALSE	TRUE	0.138582	94	0	7	87	[['C', 'intron_variant', 'MODIFIER', 'pals-24', 'WBGene00016219', 'transcript', 'C29F9.4', 'protein_coding', '2/9', 'c.57+22T>C', '', '', '', '', '', '']]
III	120637	G	['A']	{'A', 'G'}	0.0638298	1	TRUE	FALSE	TRUE	0.12015	94	0	6	88	[['A', 'missense_variant&splice_region_variant', 'MODERATE', 'pals-24', 'WBGene00016219', 'transcript', 'C29F9.4', 'protein_coding', '3/10', 'c.58G>A', 'p.Glu20Lys', '58/906', '58/906', '20/301', '', '']]
III	120643	A	['C']	{'A', 'C'}	0.0638298	1	TRUE	FALSE	FALSE	0.12015	94	0	6	88	[['C', 'missense_variant', 'MODERATE', 'pals-24', 'WBGene00016219', 'transcript', 'C29F9.4', 'protein_coding', '3/10', 'c.64A>C', 'p.Thr22Pro', '64/906', '64/906', '22/301', '', '']]
III	120647	A	['C']	{'A', 'C'}	0.0638298	1	TRUE	FALSE	FALSE	0.12015	94	0	6	88	[['C', 'missense_variant', 'MODERATE', 'pals-24', 'WBGene00016219', 'transcript', 'C29F9.4', 'protein_coding', '3/10', 'c.68A>C', 'p.Asn23Thr', '68/906', '68/906', '23/301', '', '']]
III	120655	A	['G']	{'A', 'G'}	0.0638298	1	TRUE	FALSE	TRUE	0.12015	94	0	6	88	[['G', 'missense_variant', 'MODERATE', 'pals-24', 'WBGene00016219', 'transcript', 'C29F9.4', 'protein_coding', '3/10', 'c.76A>G', 'p.Ser26Gly', '76/906', '76/906', '26/301', '', '']]
III	120657	T	['A']	{'T', 'A'}	0.0638298	1	TRUE	FALSE	FALSE	0.12015	94	0	6	88	[['A', 'missense_variant', 'MODERATE', 'pals-24', 'WBGene00016219', 'transcript', 'C29F9.4', 'protein_coding', '3/10', 'c.78T>A', 'p.Ser26Arg', '78/906', '78/906', '26/301', '', '']]
III	120684	A	['G']	{'A', 'G'}	0.0638298	1	TRUE	FALSE	TRUE	0.12015	94	0	6	88	[['G', 'synonymous_variant', 'LOW', 'pals-24', 'WBGene00016219', 'transcript', 'C29F9.4', 'protein_coding', '3/10', 'c.105A>G', 'p.Gln35Gln', '105/906', '105/906', '35/301', '', '']]
III	120705	C	['G']	{'G', 'C'}	0.0638298	1	TRUE	FALSE	FALSE	0.12015	94	0	6	88	[['G', 'splice_region_variant&intron_variant', 'LOW', 'pals-24', 'WBGene00016219', 'transcript', 'C29F9.4', 'protein_coding', '3/9', 'c.119+7C>G', '', '', '', '', '', '']]
III	120708	A	['G']	{'A', 'G'}	0.0638298	1	TRUE	FALSE	TRUE	0.12015	94	0	6	88	[['G', 'intron_variant', 'MODIFIER', 'pals-24', 'WBGene00016219', 'transcript', 'C29F9.4', 'protein_coding', '3/9', 'c.119+10A>G', '', '', '', '', '', '']]
III	120709	A	['C']	{'A', 'C'}	0.0638298	1	TRUE	FALSE	FALSE	0.12015	94	0	6	88	[['C', 'intron_variant', 'MODIFIER', 'pals-24', 'WBGene00016219', 'transcript', 'C29F9.4', 'protein_coding', '3/9', 'c.119+11A>C', '', '', '', '', '', '']]
III	120714	A	['T']	{'T', 'A'}	0.0638298	1	TRUE	FALSE	FALSE	0.12015	94	0	6	88	[['T', 'intron_variant', 'MODIFIER', 'pals-24', 'WBGene00016219', 'transcript', 'C29F9.4', 'protein_coding', '3/9', 'c.119+16A>T', '', '', '', '', '', '']]
III	120718	G	['T']	{'T', 'G'}	0.0638298	1	TRUE	FALSE	FALSE	0.12015	94	0	6	88	[['T', 'intron_variant', 'MODIFIER', 'pals-24', 'WBGene00016219', 'transcript', 'C29F9.4', 'protein_coding', '3/9', 'c.119+20G>T', '', '', '', '', '', '']]
III	120720	C	['A']	{'A', 'C'}	0.0638298	1	TRUE	FALSE	FALSE	0.12015	94	0	6	88	[['A', 'intron_variant', 'MODIFIER', 'pals-24', 'WBGene00016219', 'transcript', 'C29F9.4', 'protein_coding', '3/9', 'c.119+22C>A', '', '', '', '', '', '']]
III	120722	A	['G']	{'A', 'G'}	0.0638298	1	TRUE	FALSE	TRUE	0.12015	94	0	6	88	[['G', 'intron_variant', 'MODIFIER', 'pals-24', 'WBGene00016219', 'transcript', 'C29F9.4', 'protein_coding', '3/9', 'c.120-23A>G', '', '', '', '', '', '']]
III	120726	A	['C']	{'A', 'C'}	0.0645161	0.989362	TRUE	FALSE	FALSE	0.12136	93	0	6	87	[['C', 'intron_variant', 'MODIFIER', 'pals-24', 'WBGene00016219', 'transcript', 'C29F9.4', 'protein_coding', '3/9', 'c.120-19A>C', '', '', '', '', '', '']]
III	120736	G	['C']	{'G', 'C'}	0.0319149	1	TRUE	FALSE	FALSE	0.0621231	94	0	3	91	[['C', 'intron_variant', 'MODIFIER', 'pals-24', 'WBGene00016219', 'transcript', 'C29F9.4', 'protein_coding', '3/9', 'c.120-9G>C', '', '', '', '', '', '']]
III	120854	T	['G']	{'T', 'G'}	0.0645161	0.989362	TRUE	FALSE	FALSE	0.12136	93	0	6	87	[['G', 'intron_variant', 'MODIFIER', 'pals-24', 'WBGene00016219', 'transcript', 'C29F9.4', 'protein_coding', '4/9', 'c.150+79T>G', '', '', '', '', '', '']]
III	120855	T	['C']	{'T', 'C'}	0.0645161	0.989362	TRUE	FALSE	TRUE	0.12136	93	0	6	87	[['C', 'intron_variant', 'MODIFIER', 'pals-24', 'WBGene00016219', 'transcript', 'C29F9.4', 'protein_coding', '4/9', 'c.150+80T>C', '', '', '', '', '', '']]
III	120866	C	['T']	{'T', 'C'}	0.0645161	0.989362	TRUE	FALSE	TRUE	0.12136	93	0	6	87	[['T', 'intron_variant', 'MODIFIER', 'pals-24', 'WBGene00016219', 'transcript', 'C29F9.4', 'protein_coding', '4/9', 'c.150+91C>T', '', '', '', '', '', '']]
III	120876	A	['G']	{'A', 'G'}	0.0645161	0.989362	TRUE	FALSE	TRUE	0.12136	93	0	6	87	[['G', 'intron_variant', 'MODIFIER', 'pals-24', 'WBGene00016219', 'transcript', 'C29F9.4', 'protein_coding', '4/9', 'c.150+101A>G', '', '', '', '', '', '']]
III	120879	A	['C']	{'A', 'C'}	0.0645161	0.989362	TRUE	FALSE	FALSE	0.12136	93	0	6	87	[['C', 'intron_variant', 'MODIFIER', 'pals-24', 'WBGene00016219', 'transcript', 'C29F9.4', 'protein_coding', '4/9', 'c.150+104A>C', '', '', '', '', '', '']]
III	120885	G	['T']	{'T', 'G'}	0.0645161	0.989362	TRUE	FALSE	FALSE	0.12136	93	0	6	87	[['T', 'intron_variant', 'MODIFIER', 'pals-24', 'WBGene00016219', 'transcript', 'C29F9.4', 'protein_coding', '4/9', 'c.150+110G>T', '', '', '', '', '', '']]
III	120895	T	['C']	{'T', 'C'}	0.0645161	0.989362	TRUE	FALSE	TRUE	0.12136	93	0	6	87	[['C', 'intron_variant', 'MODIFIER', 'pals-24', 'WBGene00016219', 'transcript', 'C29F9.4', 'protein_coding', '4/9', 'c.150+120T>C', '', '', '', '', '', '']]
III	120991	A	['T']	{'T', 'A'}	0.107527	0.989362	TRUE	FALSE	FALSE	0.192967	93	0	10	83	[['T', 'intron_variant', 'MODIFIER', 'pals-24', 'WBGene00016219', 'transcript', 'C29F9.4', 'protein_coding', '4/9', 'c.151-166A>T', '', '', '', '', '', '']]
III	121027	C	['A']	{'A', 'C'}	0.0638298	1	TRUE	FALSE	FALSE	0.12015	94	0	6	88	[['A', 'intron_variant', 'MODIFIER', 'pals-24', 'WBGene00016219', 'transcript', 'C29F9.4', 'protein_coding', '4/9', 'c.151-130C>A', '', '', '', '', '', '']]
III	121041	G	['A']	{'A', 'G'}	0.0638298	1	TRUE	FALSE	TRUE	0.12015	94	0	6	88	[['A', 'intron_variant', 'MODIFIER', 'pals-24', 'WBGene00016219', 'transcript', 'C29F9.4', 'protein_coding', '4/9', 'c.151-116G>A', '', '', '', '', '', '']]
III	121050	G	['A']	{'A', 'G'}	0.0106383	1	TRUE	FALSE	TRUE	0.0211628	94	0	1	93	[['A', 'intron_variant', 'MODIFIER', 'pals-24', 'WBGene00016219', 'transcript', 'C29F9.4', 'protein_coding', '4/9', 'c.151-107G>A', '', '', '', '', '', '']]
III	121071	T	['A']	{'T', 'A'}	0.430108	0.989362	TRUE	FALSE	FALSE	0.49288	93	0	40	53	[['A', 'intron_variant', 'MODIFIER', 'pals-24', 'WBGene00016219', 'transcript', 'C29F9.4', 'protein_coding', '4/9', 'c.151-86T>A', '', '', '', '', '', '']]
III	121072	A	['T']	{'T', 'A'}	0.0107527	0.989362	TRUE	FALSE	FALSE	0.0213891	93	0	1	92	[['T', 'intron_variant', 'MODIFIER', 'pals-24', 'WBGene00016219', 'transcript', 'C29F9.4', 'protein_coding', '4/9', 'c.151-85A>T', '', '', '', '', '', '']]
III	121075	T	['A']	{'T', 'A'}	0.0638298	1	TRUE	FALSE	FALSE	0.12015	94	0	6	88	[['A', 'intron_variant', 'MODIFIER', 'pals-24', 'WBGene00016219', 'transcript', 'C29F9.4', 'protein_coding', '4/9', 'c.151-82T>A', '', '', '', '', '', '']]
III	121097	G	['T']	{'T', 'G'}	0.0645161	0.989362	TRUE	FALSE	FALSE	0.12136	93	0	6	87	[['T', 'intron_variant', 'MODIFIER', 'pals-24', 'WBGene00016219', 'transcript', 'C29F9.4', 'protein_coding', '4/9', 'c.151-60G>T', '', '', '', '', '', '']]
III	121141	C	['CA']	{'CA', 'C'}	0.0645161	0.989362	FALSE	TRUE	FALSE	0.12136	93	0	6	87	[['CA', 'intron_variant', 'MODIFIER', 'pals-24', 'WBGene00016219', 'transcript', 'C29F9.4', 'protein_coding', '4/9', 'c.151-16_151-15insA', '', '', '', '', '', '']]
[truncated: 15,497 more rows]

## Sheet: GWAS_interval_variants
CHROM	POS	REF	ALT	effect	nt_change	aa_change	gene_name	gene_id	transcript_biotype	feature_type	impact	num_allele	num_alt_allele	num_strains	trait	peakPOS	log10p	corrected_spearman_cor_p	spearman_cor_p	peak_id	peak	n_variants	max_gene_corr_p
[truncated: 6,805 more rows]

[truncated: 1 more sheets: GWAS_mapping_summary]
